# Supplementary material
Source: Research Square preprint supplement (doi:10.21203/rs.3.rs-9581360/v1)
Supplement: Supplementary file 1 [file 5b0b909a3dfa80389f03f1dd.pdf]

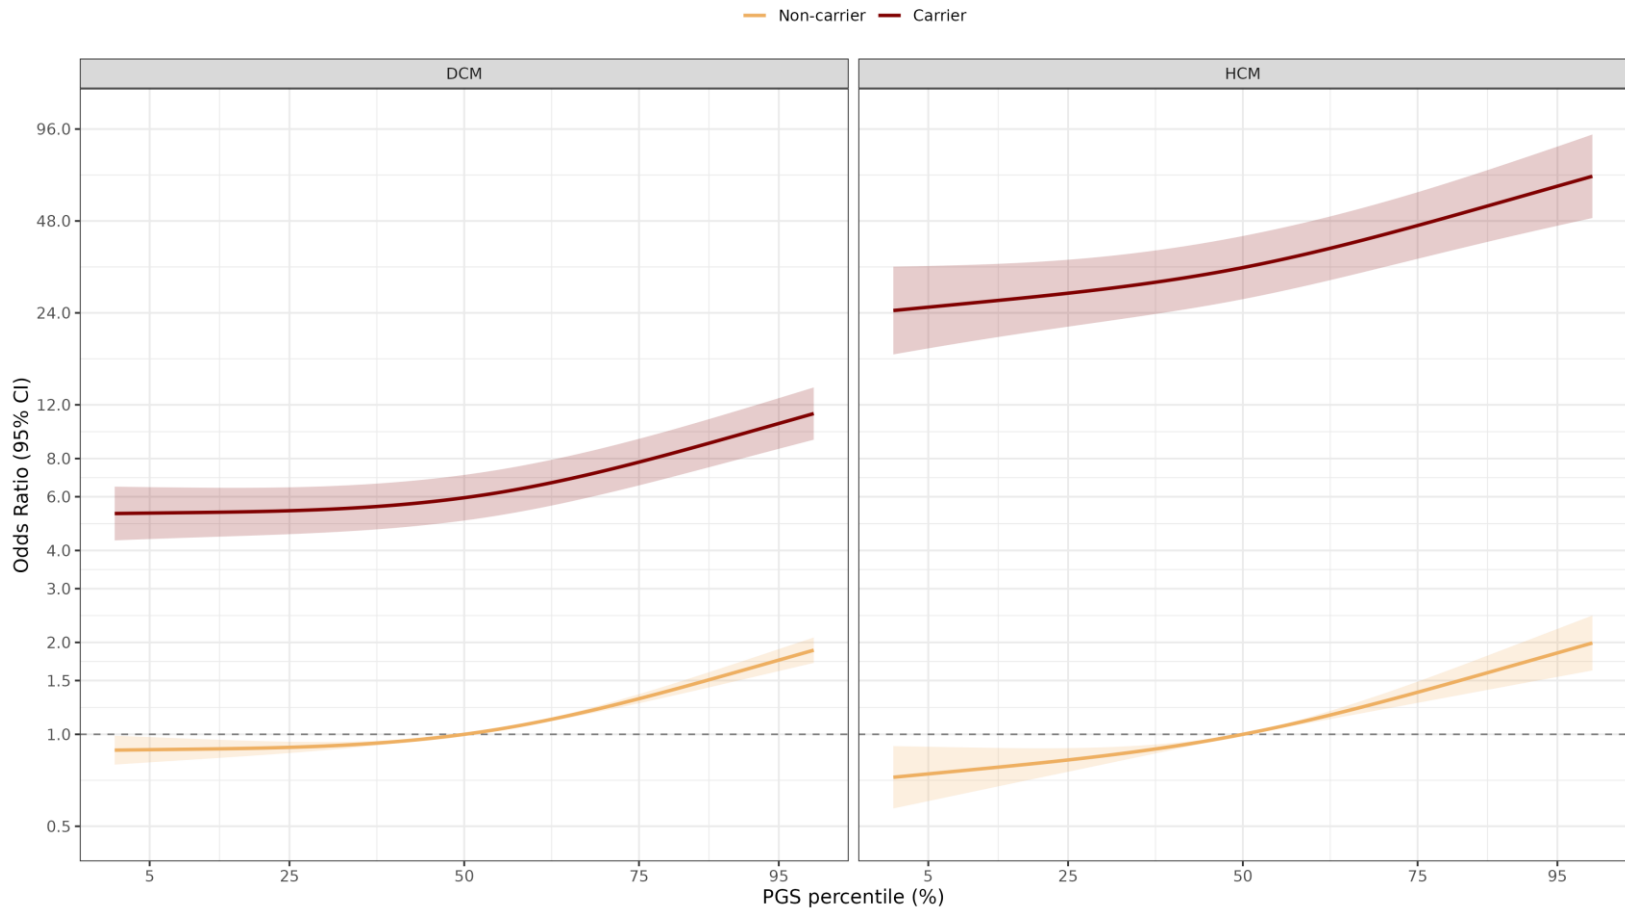

**Supplemental Figure S3. Phenotype specific polygenic risk among monogenic cardiomyopathy variant carriers**

Risk of (A) DCM and (B) HCM across PGS percentiles in carriers of corresponding disease genes. PGS was matched to phenotype (HCM PGS for HCM; DCM PGS for DCM).
