# Supplementary material
Source: Research Square preprint supplement (doi:10.21203/rs.3.rs-9581360/v1)
Supplement: Supplementary file 1 [file 42d104a40e24ccc0d2274901.xlsx]

## Sheet: PVS1 decision and inclusion
Supplemental Table S1: Complete inclusion criteria and ACMG PVS1 criteria application decisions
Gene	Disease	PVS1	PVS1_Strong	PVS1_Mod	PVS1_Supporting
ACTC1	HCM	Do not apply.	Do not apply.	Do not apply.	Do not apply.
BAG3	DCM & Myofibrill Myopathy	PVS1 applied: This frameshifting variant is predicted to undergo NMD and is present on an biologically relevant transcript (Mayo-ODP criteria 2025).	PVS1_Strong applied: (Mayo-ODP criteria 2025).	PVS1_moderate applied: Add rationale from PVS1 flow chart (Mayo-ODP criteria 2025). Last P/LP in the last exon 451Ter.	PVS1_supporting applied: Add rationale from PVS1 flow chart (Mayo-ODP criteria 2025).
DES	DCM & Myofibrill Myopathy	Do not apply.	Do not apply.	PVS1_moderate max. Reduced PVS1 from tree by two levels.(Mayo-ODP criteria 2025)	PVS1_supporting. Reduced PVS1 from tree by two levels.(Mayo-ODP criteria 2025)
DSC2	ARVC	Do not apply.	Do not apply.	PVS1_moderate max. Reduced PVS1 from tree by two levels.(Mayo-ODP criteria 2025)	PVS1_supporting. Reduced PVS1 from tree by two levels.(Mayo-ODP criteria 2025)
DSG2	ARVC	Do not apply.	Do not apply.	PVS1_moderate max. Reduced PVS1 from tree by two levels.(Mayo-ODP criteria 2025)	PVS1_supporting. Reduced PVS1 from tree by two levels.(Mayo-ODP criteria 2025)
DSP	DCM & ARVC	PVS1 applied: This frameshifting variant is predicted to undergo NMD and is present on an biologically relevant transcript (Mayo-ODP criteria 2025). or PVS1 applied to the last known P/LP variant Loss of function variants in DSP have been seen in individuals with DCM and/or ARVC. Additionally, low penetrance has been noted ranging from 5-13% (PMID: 35819174, 31638835, 33684294). Other phenotypes …	PVS1_Strong applied: (Mayo-ODP criteria 2025).	PVS1_moderate applied: Add rationale from PVS1 flow chart (Mayo-ODP criteria 2025). DSP is expressed in two major isoforms generated by alternative splicing of exon 23 of 24: DSP I and DSP II. DSP I is the only isoform expressed in the heart, while both DSP I and II are expressed in other tissues, such as the skin (PMID: 23137101). Therefore, loss-of-function variants identified in exon 23, which…	PVS1_supporting applied: Add rationale from PVS1 flow chart (Mayo-ODP criteria 2025).
FLNC	DCM & Myofibrill Myopathy	PVS1 applied: This frameshifting variant is predicted to undergo NMD and is present on an biologically relevant transcript (Mayo-ODP criteria 2025).	PVS1_Strong applied: (Mayo-ODP criteria 2025).	PVS1_moderate applied: Add rationale from PVS1 flow chart (Mayo-ODP criteria 2025)	PVS1_supporting applied: Add rationale from PVS1 flow chart (Mayo-ODP criteria 2025).
LMNA	DCM	PVS1 applied: This frameshifting variant is predicted to undergo NMD and is present on an biologically relevant transcript (Mayo-ODP criteria 2025).	PVS1_Strong applied: (Mayo-ODP criteria 2025).	PVS1_moderate applied: Add rationale from PVS1 flow chart (Mayo-ODP criteria 2025)	PVS1_supporting applied: Add rationale from PVS1 flow chart (Mayo-ODP criteria 2025).
MYBPC3	HCM	PVS1 applied: This frameshifting variant is predicted to undergo NMD and is present on an biologically relevant transcript (Mayo-ODP criteria 2025).	PVS1_Strong applied: (Mayo-ODP criteria 2025).	PVS1_Moderate applied: (Mayo-ODP criteria 2025).	PVS1_supporting applied: Add rationale from PVS1 flow chart (Mayo-ODP criteria 2025).
MYH7 (ClinGen VCEP)	HCM & DCM	Do not apply.	Do not apply.	Do not apply.	Do not apply.
MYL2	HCM	Do not apply.	Do not apply.	Do not apply.	Do not apply.
MYL3	HCM	Do not apply.	Do not apply.	Do not apply.	Do not apply.
PKP2	ARVC	PVS1 applied: This frameshifting variant is predicted to undergo NMD and is present on an biologically relevant transcript (Mayo-ODP criteria 2025).	PVS1_Strong applied: (Mayo-ODP criteria 2025).	PVS1_moderate applied: Add rationale from PVS1 flow chart (Mayo-ODP criteria 2025)	PVS1_supporting applied: Add rationale from PVS1 flow chart (Mayo-ODP criteria 2025).
PRKAG2	HCM	Do not apply.	Do not apply.	Do not apply.	Do not apply.
RBM20	DCM	Do not apply.	Do not apply.	Do not apply. (PVS1_Moderate is max can be considered, HiScore 1 was internally calculated)	Do not apply. (PVS1_Supporting is max can be considered, HiScore 1 was internally calculated)
SCN5A	DCM (also LongQT 3 & Brugada syndrome)	PVS1 applied: This frameshifting variant is predicted to undergo NMD and is present on an biologically relevant transcript (Mayo-ODP criteria 2025).	PVS1_Strong applied: (Mayo-ODP criteria 2025).	PVS1_moderate applied: Add rationale from PVS1 flow chart (Mayo-ODP criteria 2025)	PVS1_supporting applied: Add rationale from PVS1 flow chart (Mayo-ODP criteria 2025).
TMEM43	ARVC	Do not apply.	Do not apply.	Do not apply.	Do not apply.
TNNC1	DCM	Do not apply.	Do not apply.	Do not apply.	Do not apply.
TNNI3	HCM	Do not apply.	Do not apply.	Do not apply.	Do not apply.
TNNT2	DCM & HCM	Do not apply. HiScore 0.	Do not apply. HiScore 0.	Do not apply. HiScore 0.	Do not apply. HiScore 0.
TPM1	HCM	Do not apply.	Do not apply.	Do not apply. (PVS1_Moderate is max can be considered, HiScore 1)	Do not apply. (PVS1_Supporting is max can be considered, HiScore 1)
TTN	DCM	PVS1 applied: This frameshifting variant is predicted to undergo NMD and is present on an biologically relevant transcript (Mayo-ODP criteria 2025). Within regions Exon PSI>=90% (+/-50bp) chr2:178792147-178807473 chr2:178758934-178789547 chr2:178753074-178753230 chr2:178738032-178741971 chr2:178639649-178642367 chr2:178625223-178636849 chr2:178525939-178622817	PVS1_Strong applied: (Mayo-ODP criteria 2025).	PVS1_moderate applied: Add rationale from PVS1 flow chart (Mayo-ODP criteria 2025)	PVS1_supporting applied: Add rationale from PVS1 flow chart (Mayo-ODP criteria 2025).
