# Supplementary material
Source: Research Square preprint supplement (doi:10.21203/rs.3.rs-9581360/v1)

**Supplemental Figure S1: Variant Annotation and curation workflow.**

Whole-genome sequencing (WGS) data from All of Us participants were processed into a meta-level Variant Annotation Table (VAT). Variants were restricted to a predefined set of 22 ACMG cardiomyopathy-associated genes and prioritized for potential reportability using the internally developed and validated Semi-Automated Variant Interpretation (SAVI) software. Prioritized variants underwent manual review and confirmation of classification using the SAVI user interface. Clinical phenotypes were ascertained through linked electronic health record (EHR) data using International Classification of Diseases, Ninth and Tenth Revision (ICD-9/10), and Current Procedural Terminology (CPT) codes. Curated genetic variants were subsequently correlated with cardiac phenotypes in variant carriers.

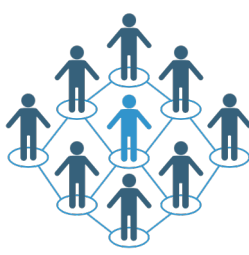

All of Us  
Participants with WGS data  
(n = 414,830)

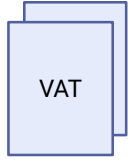

Meta-level Variant  
Annotation Table (VAT)

Subset with Genes of Interest  
(22 ACMG Cardiomyopathy-  
related genes and variants)

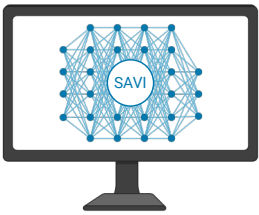

Potentially reportable  
variants prioritized by the  
SAVI software

Manual curation of  
prioritized variants by  
SAVI-UI to confirm  
classification

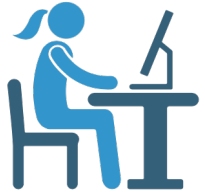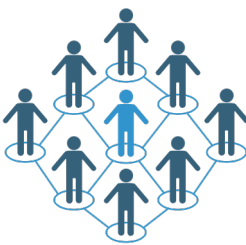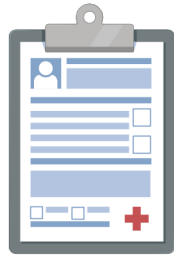

EHR

Clinical phenotype: ICD  
9/10 and CPT codes\*

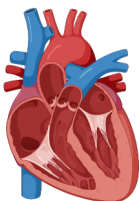

Identification of clinical  
phenotypes in participants  
with curated reportable  
variants

Correlation of P/  
LP variants with  
clinical phenotypes

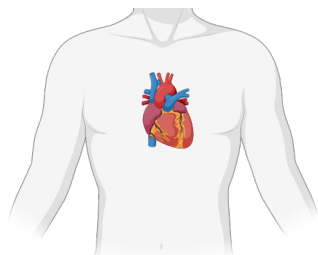

Supplement: Supplementary file 2 [file 5fc7efa5291892c3c09981f8.pdf]
