# Supplementary material
Source: Research Square preprint supplement (doi:10.21203/rs.3.rs-9581360/v1)
Supplement: Supplementary file 2 [file 813b989f32795a85d0057fd8.xlsx]

## Sheet: Population_prev
Supplemental Table S4: Population prevalence of pathogenic and likely pathogenic variants stratified genetic ancestry. *exact number and percentage have been modified to be compliant with AoU's data privacy and reporting guideline
Genetic Ancestry	n	carriers	p	lo	hi
African	84148	880	1.046	0.979	1.117
Admixed Americans	79106	602	0.761	0.703	0.824
East Asian	10099	98	0.97	0.797	1.18
European	234353	2101	0.897	0.859	0.935
Middle Eastern	1545	< 20 *	< 1.3 *	< 0.289 *	< 1.54 *
South Asian	5579	73	1.302	1.037	1.633
