# Supplementary material
Source: Research Square preprint supplement (doi:10.21203/rs.3.rs-9581360/v1)
Supplement: Supplementary file 3 [file a6e64b1c2eb31ad7851f352e.xlsx]

## Sheet: Sheet1
Supplemental Table S5. Main phenotypes (ACHF, NIHF, and NICM) and subtypes (HCM, and DCM) stratified by genetic ancestry, carrier status, and high PGS frequencies. *exact number and percentage have been modified to be compliant with AoU's data privacy and reporting guideline
	genetic_ancestry	n	n_DCM_variant_carriers	percentage_DCM_variant_carriers	n_HCM_variant_carriers	percentage_HCM_variant_carriers	n_ACM_variant_carriers	percentage_ACM_variant_carriers	n_high_PGS	percentage_high_PGS
ACHF	afr	5681	82	1.44341	31	0.545679	<20*	0.264038	415	7.30505
	amr	2704	37	1.36834	<20*	0.369822	<20*	0.0369823	462	17.0858
	eas	<20*	0	0	0	0	0	0	0	0
	eur	12609	189	1.49893	95	0.75343	28	0.222064	1173	9.30288
	mid	<20*	0	0	0	0	0	0	0	0
	sas	<20*	0	0	0	0	0	0	<20*	16.6667
NIHF	afr	4114	62	1.50705	25	0.607681	<20*	0.315994	285	6.92756
	amr	1777	27	1.51941	<20*	0.281373	0	0	309	17.3889
	eas	<20*	0	0	0	0	0	0	0	0
	eur	8508	146	1.71603	71	0.834509	23	0.270334	748	8.79172
	mid	<20*	0	0	0	0	0	0	0	0
	sas	<20*	0	0	0	0	0	0	<20*	20
NICM	afr	2310	53	2.29437	28	1.21212	<20*	0.34632	172	7.44589
	amr	1129	27	2.3915	<20*	0.620018	<20*	0.177148	200	17.7148
	eas	<20*	0	0	0	0	0	0	0	0
	eur	6078	170	2.79697	102	1.67818	27	0.444225	577	9.49325
	mid	<20*	0	0	0	0	0	0	<20*	25
	sas	<20*	0	0	0	0	0	0	0	0
HCM	genetic_ancestry	n	n_DCM_variant_carriers	percentage_DCM_variant_carriers	n_high_PGS	percentage_high_PGS
	afr	<345*	<20*	5.83658	<20*	7.393
	amr	<378*	<20*	5.26316	<20*	6.31579
	eur	771	68	8.81972	44	5.70687
DCM	genetic_ancestry	n	n_DCM_variant_carriers	percentage_DCM_variant_carriers	n_high_PGS	percentage_high_PGS
	afr	1233	35	2.8386	45	3.64963
	amr	<667*	<20*	3.00188	31	5.81614
	eur	2938	106	3.6079	55	1.87202
