# Supplementary material
Source: Research Square preprint supplement (doi:10.21203/rs.3.rs-9581360/v1)
Supplement: Supplementary file 4 [file 9e268ece03246d9b2e0dcced.pdf]

**Supplemental Table S6: Representative list of pathogenic and likely pathogenic variants by ancestry group.**

| Ancestry Group                               | Population (N) |                |                          |                        |
|----------------------------------------------|----------------|----------------|--------------------------|------------------------|
| <b>Overall</b>                               | 414,830        |                |                          |                        |
| Variants by Gene                             | Carriers (n)   | Prevalence (%) | Variant Type             | Variant Classification |
| <b>MYBPC3</b>                                |                |                |                          |                        |
| c.1504C>T (Arg502Trp)                        | 88             | 0.0212         | Nonsynonymous            | Likely Pathogenic      |
| c.1624G>C (Glu542Gln)                        | 51             | 0.0123         | Splice Region   Missense | Likely Pathogenic      |
| c.26-2A>G                                    | 44             | 0.0106         | Splice Acceptor          | Pathogenic             |
| c.3330+5G>C                                  | 43             | 0.0104         | Splice Donor (5th base)  | Pathogenic             |
| c.1591G>C (Gly531Arg)                        | 29             | 0.0070         | Nonsynonymous            | Likely Pathogenic      |
| <b>TTN</b>                                   |                |                |                          |                        |
| c.103945_103946insTTGGG (Arg34649LeufsTer25) | 68             | 0.0164         | Frameshift               | Pathogenic             |
| c.103943_103944del (Tyr34648SerfsTer3)       | 68             | 0.0164         | Frameshift               | Likely Pathogenic      |
| c.61876C>T (Arg20626Ter)                     | 46             | 0.0111         | Stop Gain                | Pathogenic             |
| c.86821+2T>A                                 | 29             | 0.0070         | Splice Donor             | Pathogenic             |
| c.103360del (Glu34454AsnfsTer3)              | 20             | 0.0048         | Frameshift               | Pathogenic             |
| <b>PKP2</b>                                  |                |                |                          |                        |
| c.971_972insCT (p.Ala325TrpfsTer28)          | 62             | 0.0149         | Frameshift               | Pathogenic             |
| c.2014-1G>C                                  | 46             | 0.0111         | Splice Acceptor          | Pathogenic             |
| c.2066_2070del (His689ProfsTer8)             | 31             | 0.0075         | Frameshift               | Pathogenic             |
| c.1237C>T (Arg413Ter)                        | 31             | 0.0075         | Stop Gain                | Pathogenic             |
| c.1511del (Gly504ValfsTer15)                 | 30             | 0.0072         | Frameshift               | Pathogenic             |
| <b>MYH7</b>                                  |                |                |                          |                        |
| c.2606G>A (Arg869His)                        | 34             | 0.0082         | Nonsynonymous            | Likely Pathogenic      |
| c.2389G>A (Ala797Thr)                        | 26             | 0.0063         | Nonsynonymous            | Likely Pathogenic      |
| c.3169G>A (Gly1057Ser)                       | 20             | 0.0048         | Nonsynonymous            | Likely Pathogenic      |
| <b>SCN5A</b>                                 |                |                |                          |                        |
| c.3214G>T (Glu1072Ter)                       | 31             | 0.0075         | Stop Gain                | Likely Pathogenic      |
| c.673C>T (Arg225Trp)                         | 30             | 0.0072         | Nonsynonymous            | Likely Pathogenic      |
| <b>MYL3</b>                                  |                |                |                          |                        |
| c.427G>A (Glu143Lys)                         | 22             | 0.0053         | Nonsynonymous            | Likely Pathogenic      |

\* indicate the variant is unique to this ancestry group

| Ancestry Group             |              | Population (N) |              |                        |
|----------------------------|--------------|----------------|--------------|------------------------|
| <b>South Asians</b>        |              | 5,579          |              |                        |
| Variants by Gene           | Carriers (n) | Prevalence (%) | Variant Type | Variant Classification |
| <b>TTN</b>                 |              |                |              |                        |
| c.77185A>T (Lys25729Ter) * | < 20         | < 0.358        | Stop Gain    | Pathogenic             |

\* indicate the variant is unique to this ancestry group

| Ancestry Group           |              | Population (N) |               |                        |  |
|--------------------------|--------------|----------------|---------------|------------------------|--|
| <b>East Asians</b>       |              | 10,099         |               |                        |  |
| Variants by Gene         | Carriers (n) | Prevalence (%) | Variant Type  | Variant Classification |  |
| <b>MYH7</b>              |              |                |               |                        |  |
| c.4145G>A (Arg1382Gln)   | < 20         | < 0.198        | Nonsynonymous | Likely Pathogenic      |  |
| c.3134G>A (Arg1045His)   | < 20         | < 0.198        | Nonsynonymous | Likely Pathogenic      |  |
| <b>SCN5A</b>             |              |                |               |                        |  |
| c.4279G>T (Ala1427Ser) * | < 20         | < 0.198        | Nonsynonymous | Likely Pathogenic      |  |
| c.674G>A (Arg225Gln)     | < 20         | < 0.198        | Nonsynonymous | Likely Pathogenic      |  |

\* indicate the variant is unique to this ancestry group

| Ancestry Group                         |              | Population (N) |                          |                        |
|----------------------------------------|--------------|----------------|--------------------------|------------------------|
| <b>Admixed Americans</b>               |              | 79,106         |                          |                        |
| Variants by Gene                       | Carriers (n) | Prevalence (%) | Variant Type             | Variant Classification |
| <b>MYBPC3</b>                          |              |                |                          |                        |
| c.1800del(Lys600AsnfsTer2)             | < 20         | < 0.0253       | Frameshift               | Pathogenic             |
| c.3811C>T(Arg1271Ter)                  | < 20         | < 0.0253       | Stop Gain                | Pathogenic             |
| c.3190+5G>A                            | < 20         | < 0.0253       | Splice Donor (5th base)  | Pathogenic             |
| c.1624G>C (Glu542Gln)                  | < 20         | < 0.0253       | Splice Region   Missense | Likely Pathogenic      |
| c.1591G>C (Gly531Arg)                  | < 20         | < 0.0253       | Nonsynonymous            | Likely Pathogenic      |
| c.1483C>G (Arg495Gly)                  | < 20         | < 0.0253       | Nonsynonymous            | Likely Pathogenic      |
| c.926+1G>C *                           | < 20         | < 0.0253       | Splice Donor             | Pathogenic             |
| <b>TTN</b>                             |              |                |                          |                        |
| c.75469C>T (Arg25157Ter)               | < 20         | < 0.0253       | Stop Gain                | Pathogenic             |
| c.103705A>T (Lys34569Ter) *            | < 20         | < 0.0253       | Stop Gain                | Likely Pathogenic      |
| c.75138_75141del (Lys25046AsnfsTer8) * | < 20         | < 0.0253       | Frameshift               | Pathogenic             |
| c.52102+1G>A                           | < 20         | < 0.0253       | Splice Donor             | Pathogenic             |
| c.40963G>T (Glu13655Ter) *             | < 20         | < 0.0253       | Stop Gain                | Pathogenic             |
| c.40723+1G>T                           | < 20         | < 0.0253       | Splice Donor             | Pathogenic             |
| c.13760del (Glu4587GlyfsTer5) *        | < 20         | < 0.0253       | Frameshift               | Likely Pathogenic      |
| c.46855C>T (Gln15619Ter) *             | < 20         | < 0.0253       | Stop Gain                | Likely Pathogenic      |
| <b>PKP2</b>                            |              |                |                          |                        |
| c.1511del (Gly504ValfsTer15)           | 23           | 0.0291         | Frameshift               | Pathogenic             |
| <b>MYH7</b>                            |              |                |                          |                        |
| c.2389G>A (Ala797Thr)                  | < 20         | < 0.0253       | Nonsynonymous            | Likely Pathogenic      |
| c.611G>A (Arg204His)                   | < 20         | < 0.0253       | Nonsynonymous            | Likely Pathogenic      |
| <b>SCN5A</b>                           |              |                |                          |                        |
| c.5461_5464del (Glu182HisfsTer10) *    | < 20         | < 0.0253       | Frameshift               | Likely Pathogenic      |
| c.3214G>T (Glu1072Ter)                 | < 20         | < 0.0253       | Stop Gain                | Likely Pathogenic      |
| <b>DSP</b>                             |              |                |                          |                        |
| c.126T>G (Tyr42Ter)                    | < 20         | < 0.0253       | Stop Gain                | Pathogenic             |
| <b>MYL3</b>                            |              |                |                          |                        |
| c.427G>A (Glu143Lys) *                 | 22           | 0.0278         | Nonsynonymous            | Likely Pathogenic      |

\* indicate the variant is unique to this ancestry group

| Ancestry Group                               | Population (N) |                |                          |                        |
|----------------------------------------------|----------------|----------------|--------------------------|------------------------|
| <b>Africans</b>                              | 84,148         |                |                          |                        |
| Variants by Gene                             | Carriers (n)   | Prevalence (%) | Variant Type             | Variant Classification |
| <b>MYBPC3</b>                                |                |                |                          |                        |
| c.3330+5G>C *                                | 43             | 0.0511         | Splice Donor (5th base)  | Pathogenic             |
| c.3286G>T (Glu1096Ter) *                     | < 20           | < 0.0237       | Stop Gain                | Pathogenic             |
| c.1624G>C (Glu542Gln)                        | < 20           | < 0.0237       | Splice Region   Missense | Likely Pathogenic      |
| c.3815-1G>A *                                | < 20           | < 0.0237       | Splice Acceptor          | Pathogenic             |
| c.1504C>T (Arg502Trp)                        | < 20           | < 0.0237       | Nonsynonymous            | Likely Pathogenic      |
| <b>TTN</b>                                   |                |                |                          |                        |
| c.103945_103946insTTGGG (Arg34649LeufsTer25) | 64             | 0.0761         | Frameshift               | Pathogenic             |
| c.103943_103944del (Tyr34648SerfsTer3)       | 64             | 0.0761         | Frameshift               | Likely Pathogenic      |
| c.9164-2A>T *                                | < 20           | < 0.0237       | Splice Acceptor          | Pathogenic             |
| c.6355G>T (Glu2119Ter)                       | < 20           | < 0.0237       | Stop Gain                | Pathogenic             |
| c.68224+2T>C                                 | < 20           | < 0.0237       | Splice Donor             | Likely Pathogenic      |
| c.57127del (Val19043Ter) *                   | < 20           | < 0.0237       | Frameshift   Stop Gain   | Likely Pathogenic      |
| <b>PKP2</b>                                  |                |                |                          |                        |
| c.971_972insCT (p.Ala325TrpfsTer28)          | 21             | 0.0250         | Frameshift               | Pathogenic             |
| c.1237C>T (Arg413Ter)                        | < 20           | < 0.0237       | Stop Gain                | Pathogenic             |
| c.1557-1G>C *                                | < 20           | < 0.0237       | Splice Acceptor          | Pathogenic             |
| 144_165del (Gln49SerfsTer56) *               | < 20           | < 0.0237       | Frameshift               | Pathogenic             |
| c.2357+1G>A                                  | < 20           | < 0.0237       | Splice Donor             | Pathogenic             |
| c.837_838del (Val280HsfsTer55)               | < 20           | < 0.0237       | Frameshift               | Pathogenic             |
| c.1511del (Gly504ValfsTer15)                 | < 20           | < 0.0237       | Frameshift               | Pathogenic             |
| c.1379-2A>T *                                | < 20           | < 0.0237       | Splice Acceptor          | Pathogenic             |
| c.533dup (His179AlafsTer37) *                | < 20           | < 0.0237       | Frameshift               | Pathogenic             |
| c.190dup (Leu64ProfsTer22) *                 | < 20           | < 0.0237       | Frameshift               | Pathogenic             |
| c.2066_2070del (His689ProfsTer8)             | < 20           | < 0.0237       | Frameshift               | Pathogenic             |
| c.1171-2A>G *                                | < 20           | < 0.0237       | Splice Acceptor          | Pathogenic             |
| c.623del (Thr208LysfsTer55) *                | < 20           | < 0.0237       | Frameshift               | Pathogenic             |
| <b>MYH7</b>                                  |                |                |                          |                        |
| c.2606G>A (Arg869His)                        | 26             | 0.0309         | Nonsynonymous            | Likely Pathogenic      |
| c.1324C>T (Arg442Cys)                        | < 20           | < 0.0237       | Nonsynonymous            | Likely Pathogenic      |
| c.2389G>A (Ala797Thr)                        | < 20           | < 0.0237       | Nonsynonymous            | Likely Pathogenic      |
| <b>SCN5A</b>                                 |                |                |                          |                        |
| c.3214G>T (Glu1072Ter)                       | 22             | 0.0261         | Stop Gain                | Likely Pathogenic      |
| c.673C>T (Arg225Trp)                         | < 20           | < 0.0237       | Nonsynonymous            | Likely Pathogenic      |
| c.2533del (Val845CysfsTer2) *                | < 20           | < 0.0237       | Frameshift               | Pathogenic             |
| c.1099C>T (Arg367Cys)                        | < 20           | < 0.0237       | Nonsynonymous            | Likely Pathogenic      |
| c.3953G>T (Gly1318Val)                       | < 20           | < 0.0237       | Nonsynonymous            | Likely Pathogenic      |
| c.4892G>A (Arg1631His)                       | < 20           | < 0.0237       | Nonsynonymous            | Likely Pathogenic      |
| <b>DES2</b>                                  |                |                |                          |                        |
| c.1048C>T (Arg350Trp)                        | < 20           | < 0.0237       | Nonsynonymous            | Pathogenic             |
| <b>DSP</b>                                   |                |                |                          |                        |
| c.3865C>T (Gln1289Ter) *                     | < 20           | < 0.0237       | Stop Gain                | Likely Pathogenic      |
| <b>FLNC</b>                                  |                |                |                          |                        |
| c.3934_3937dup (Arg1313LeufsTer20) *         | < 20           | < 0.0237       | Frameshift               | Likely Pathogenic      |
| <b>TNNC1</b>                                 |                |                |                          |                        |
| c.23C>T (Ala8Val)                            | < 20           | < 0.0237       | Splice Region   Missense | Likely Pathogenic      |
| <b>TNNI3</b>                                 |                |                |                          |                        |
| c.497C>T (Ser166Phe)                         | < 20           | < 0.0237       | Nonsynonymous            | Likely Pathogenic      |
| c.586G>A (Asp196Asn)                         | < 20           | < 0.0237       | Nonsynonymous            | Likely Pathogenic      |
| c.433C>T (Arg145Trp)                         | < 20           | < 0.0237       | Nonsynonymous            | Pathogenic             |
| <b>TPM1</b>                                  |                |                |                          |                        |
| c.842T>C (Met281Thr) *                       | < 20           | < 0.0237       | Nonsynonymous            | Likely Pathogenic      |

\* indicate the variant is unique to this ancestry group

| Ancestry Group                          | Population (N) |                |                          |                        |
|-----------------------------------------|----------------|----------------|--------------------------|------------------------|
| Europeans                               | 234,353        |                |                          |                        |
| Variants by Gene                        | Carriers (n)   | Prevalence (%) | Variant Type             | Variant Classification |
| <b>MYBPC3</b>                           |                |                |                          |                        |
| c.1504C>T (Arg502Trp)                   | 79             | 0.0337         | Nonsynonymous            | Likely Pathogenic      |
| c.26-2A                                 | 42             | 0.0179         | Splice Acceptor          | Pathogenic             |
| c.1624G>C (Glu542Gln)                   | 36             | 0.0154         | Splice Region   Missense | Likely Pathogenic      |
| c.2373dup (Trp792ValfsTer41)            | < 20           | < 0.0085       | Frameshift               | Pathogenic             |
| c.1591G>C (Gly531Arg)                   | < 20           | < 0.0085       | Nonsynonymous            | Likely Pathogenic      |
| c.3330+2T>G *                           | < 20           | < 0.0085       | Splice Donor (5th base)  | Pathogenic             |
| c.2459G>A (Arg820Gln)                   | < 20           | < 0.0085       | Nonsynonymous            | Pathogenic             |
| c.1624+4A>T                             | < 20           | < 0.0085       | Splice Region   Intron   | Pathogenic             |
| c.927-9G>A                              | < 20           | < 0.0085       | Intron                   | Likely Pathogenic      |
| c.772G>A (Glu258Lys)                    | < 20           | < 0.0085       | Splice Region   Missense | Pathogenic             |
| c.2864_2865del (Pro955ArgfsTer95)       | < 20           | < 0.0085       | Frameshift               | Pathogenic             |
| c.177_187del (Glu60AlafsTer49) *        | < 20           | < 0.0085       | Frameshift               | Pathogenic             |
| c.1928-2A>G                             | < 20           | < 0.0085       | Splice Acceptor          | Pathogenic             |
| c.833del (Gly278GlufsTer22)             | < 20           | < 0.0085       | Frameshift               | Pathogenic             |
| c.821+1G>A                              | < 20           | < 0.0085       | Splice Donor             | Pathogenic             |
| <b>TTN</b>                              |                |                |                          |                        |
| c.61876C>T (Arg20626Ter)                | 45             | 0.0192         | Stop Gain                | Pathogenic             |
| c.86821+2T>A                            | 26             | 0.0111         | Splice Donor             | Pathogenic             |
| c.103360del (Glu34454AsnfsTer3) *       | 20             | 0.0085         | Frameshift               | Pathogenic             |
| c.44816-1G>A *                          | < 20           | < 0.0085       | Splice Acceptor          | Pathogenic             |
| c.49648+2del                            | < 20           | < 0.0085       | Splice Donor             | Pathogenic             |
| c.98299_98300del (Arg32767GlyfsTer2)    | < 20           | < 0.0085       | Frameshift               | Pathogenic             |
| c.8902+1G>A                             | < 20           | < 0.0085       | Splice Donor             | Pathogenic             |
| c.105805del (Thr35269GlnfsTer24) *      | < 20           | < 0.0085       | Frameshift               | Likely Pathogenic      |
| c.12587C>A (Ser4196Ter)                 | < 20           | < 0.0085       | Stop Gain                | Pathogenic             |
| c.67349-2A>C                            | < 20           | < 0.0085       | Splice Acceptor          | Pathogenic             |
| c.45895+1G>T *                          | < 20           | < 0.0085       | Splice Donor             | Likely Pathogenic      |
| c.10303+2T>C                            | < 20           | < 0.0085       | Splice Donor             | Pathogenic             |
| c.4724_4728del (Met1575SerfsTer6) *     | < 20           | < 0.0085       | Stop Gain                | Pathogenic             |
| c.98994del (Lys32998AsnfsTer63)         | < 20           | < 0.0085       | Frameshift               | Pathogenic             |
| c.9220C>T (Arg3074Ter) *                | < 20           | < 0.0085       | Stop Gain                | Pathogenic             |
| c.97050dup (Glu32351ArgfsTer6) *        | < 20           | < 0.0085       | Frameshift               | Pathogenic             |
| c.92317C>T (Arg30773Ter)                | < 20           | < 0.0085       | Stop Gain                | Pathogenic             |
| c.89197+1G>C *                          | < 20           | < 0.0085       | Splice Donor             | Pathogenic             |
| c.88895-5_88895-2del                    | < 20           | < 0.0085       | Splice Acceptor          | Pathogenic             |
| c.86335C>T (Arg28779Ter)                | < 20           | < 0.0085       | Stop Gain                | Pathogenic             |
| c.83064_83073del (Ala27689LeufsTer31) * | < 20           | < 0.0085       | Frameshift               | Likely Pathogenic      |
| c.82036C>T (Gln27346Ter)                | < 20           | < 0.0085       | Stop Gain                | Pathogenic             |
| c.77652_77662del (Glu25884AspfsTer3) *  | < 20           | < 0.0085       | Frameshift               | Likely Pathogenic      |
| c.77648_77649del (Ile25883ArgfsTer7) *  | < 20           | < 0.0085       | Frameshift               | Likely Pathogenic      |
| c.77646del (Ile25883SerfsTer4) *        | < 20           | < 0.0085       | Frameshift               | Likely Pathogenic      |
| c.68224+1G>A *                          | < 20           | < 0.0085       | Splice Donor             | Pathogenic             |
| c.54112del (Glu18038ArgfsTer47) *       | < 20           | < 0.0085       | Frameshift               | Likely Pathogenic      |
| <b>PKP2</b>                             |                |                |                          |                        |
| c.2014-1G>C                             | 44             | 0.0188         | Splice Acceptor          | Pathogenic             |
| c.971_972insCT (Ala325TrpfsTer28)       | 40             | 0.0171         | Frameshift               | Pathogenic             |
| c.2066_2070del (His689ProfsTer8)        | 26             | 0.0111         | Frameshift               | Pathogenic             |
| c.235C>T (Arg79Ter)                     | < 20           | < 0.0085       | Stop Gain                | Pathogenic             |
| c.1237C>T (Arg413Ter)                   | < 20           | < 0.0085       | Stop Gain                | Pathogenic             |
| c.1481G>A (Trp494Ter) *                 | < 20           | < 0.0085       | Stop Gain                | Pathogenic             |
| c.148_151del (Thr50SerfsTer61)          | < 20           | < 0.0085       | Frameshift               | Pathogenic             |
| c.2357+1G>A                             | < 20           | < 0.0085       | Splice Donor             | Pathogenic             |
| c.1780C>T (Gln594Ter) *                 | < 20           | < 0.0085       | Stop Gain                | Pathogenic             |
| <b>MYH7</b>                             |                |                |                          |                        |
| c.3169G>A (Gly1057Ser)                  | < 20           | < 0.0085       | Nonsynonymous            | Likely Pathogenic      |
| c.5135G>A (Arg1712Gln)                  | < 20           | < 0.0085       | Nonsynonymous            | Likely Pathogenic      |
| c.3133C>T (Arg1045Cys) *                | < 20           | < 0.0085       | Nonsynonymous            | Likely Pathogenic      |
| c.1727A>G (His576Arg)                   | < 20           | < 0.0085       | Nonsynonymous            | Likely Pathogenic      |
| c.2389G>A (Ala797Thr)                   | < 20           | < 0.0085       | Nonsynonymous            | Likely Pathogenic      |
| c.2167C>T (Arg723Cys)                   | < 20           | < 0.0085       | Nonsynonymous            | Pathogenic             |
| c.1325G>A (Arg442His)                   | < 20           | < 0.0085       | Nonsynonymous            | Likely Pathogenic      |
| c.427C>T (Arg143Trp)                    | < 20           | < 0.0085       | Nonsynonymous            | Likely Pathogenic      |
| c.2717A>G (Asp906Gly)                   | < 20           | < 0.0085       | Nonsynonymous            | Likely Pathogenic      |
| c.2722C>G (Leu908Val)                   | < 20           | < 0.0085       | Nonsynonymous            | Likely Pathogenic      |
| c.1988G>A (Arg663His)                   | < 20           | < 0.0085       | Nonsynonymous            | Likely Pathogenic      |
| c.2080C>T (Arg694Cys)                   | < 20           | < 0.0085       | Nonsynonymous            | Likely Pathogenic      |
| c.1370T>C (Ile457Thr)                   | < 20           | < 0.0085       | Nonsynonymous            | Likely Pathogenic      |
| c.2608C>T (Arg870Cys)                   | < 20           | < 0.0085       | Nonsynonymous            | Pathogenic             |
| c.4498C>T (Arg1500Trp) *                | < 20           | < 0.0085       | Nonsynonymous            | Likely Pathogenic      |
| c.4145G>A (Arg1382Gln)                  | < 20           | < 0.0085       | Nonsynonymous            | Likely Pathogenic      |
| c.2609G>A (Arg870His)                   | < 20           | < 0.0085       | Nonsynonymous            | Pathogenic             |
| c.1491G>T (Glu497Asp) *                 | < 20           | < 0.0085       | Nonsynonymous            | Likely Pathogenic      |
| <b>SCN5A</b>                            |                |                |                          |                        |
| c.3953G>T (Gly1318Val)                  | < 20           | < 0.0085       | Nonsynonymous            | Likely Pathogenic      |
| c.4842CTT[2];[1] (Phe1615[2];[1])       | < 20           | < 0.0085       | Inframe Deletion         | Likely Pathogenic      |
| c.1338+2T>A                             | < 20           | < 0.0085       | Splice Donor             | Pathogenic             |
| c.673C>T (Arg225Trp)                    | < 20           | < 0.0085       | Nonsynonymous            | Likely Pathogenic      |
| c.2441G>A (Arg814Gln)                   | < 20           | < 0.0085       | Nonsynonymous            | Likely Pathogenic      |
| c.5347G>A (Glu1783Lys)                  | < 20           | < 0.0085       | Nonsynonymous            | Pathogenic             |
| c.1127G>A (Arg376His)                   | < 20           | < 0.0085       | Nonsynonymous            | Likely Pathogenic      |
| c.4892G>A (Arg1631His)                  | < 20           | < 0.0085       | Nonsynonymous            | Likely Pathogenic      |
| <b>DSG2</b>                             |                |                |                          |                        |
| c.523+2T>C *                            | < 20           | < 0.0085       | Splice Donor             | Pathogenic             |
| <b>DSP</b>                              |                |                |                          |                        |
| c.2436+2T>C *                           | < 20           | < 0.0085       | Splice Donor             | Pathogenic             |
| c.478C>T (Arg160Ter)                    | < 20           | < 0.0085       | Stop Gain                | Pathogenic             |
| c.126T>G (Tyr42Ter)                     | < 20           | < 0.0085       | Stop Gain                | Pathogenic             |
| c.3735_3741dup (Asp1248LysfsTer7)       | < 20           | < 0.0085       | Frameshift               | Pathogenic             |
| c.4531C>T (Gln1511Ter) *                | < 20           | < 0.0085       | Stop Gain                | Likely Pathogenic      |
| c.2437-1G>C                             | < 20           | < 0.0085       | Splice Acceptor          | Pathogenic             |
| c.6496C>T (Arg2166Ter)                  | < 20           | < 0.0085       | Stop Gain                | Pathogenic             |
| <b>FLNC</b>                             |                |                |                          |                        |
| c.3791-1G>C *                           | < 20           | < 0.0085       | Splice Acceptor          | Pathogenic             |
| c.5199+1G>T *                           | < 20           | < 0.0085       | Splice Donor             | Pathogenic             |
| <b>LMNA</b>                             |                |                |                          |                        |
| c.1583C>T (Thr528Met) *                 | < 20           | < 0.0085       | Nonsynonymous            | Likely Pathogenic      |
| c.992G>A (Arg331Gln)                    | < 20           | < 0.0085       | Nonsynonymous            | Likely Pathogenic      |
| <b>TNNC1</b>                            |                |                |                          |                        |
| c.23C>T (Ala8Val)                       | < 20           | < 0.0085       | Splice Region   Missense | Likely Pathogenic      |
| <b>TNNI3</b>                            |                |                |                          |                        |
| c.497C>T (Ser166Phe)                    | < 20           | < 0.0085       | Nonsynonymous            | Likely Pathogenic      |
| c.485G>A (Arg162Gln)                    | < 20           | < 0.0085       | Nonsynonymous            | Likely Pathogenic      |
| c.484C>T (Arg162Trp)                    | < 20           | < 0.0085       | Nonsynonymous            | Likely Pathogenic      |
| c.434G>A (Arg145Gln)                    | < 20           | < 0.0085       | Nonsynonymous            | Pathogenic             |
| <b>TNNT2</b>                            |                |                |                          |                        |
| c.430C>T (Arg144Trp)                    | < 20           | < 0.0085       | Nonsynonymous            | Pathogenic             |
| c.452G>A (Arg151Gln)                    | < 20           | < 0.0085       | Nonsynonymous            | Pathogenic             |
