# Supplementary material
Source: Research Square preprint supplement (doi:10.21203/rs.3.rs-9581360/v1)
Supplement: Supplementary file 4 [file cf88f1d64da66a90ea799759.xlsx]

## Sheet: CM_subtype
Supplemental Table S7A: Cardiomyopathy subtypes-specific carrier prevalence estimates, stratified by genetic ancestry. *Certain number and percentage has been modified to be compliant with AoU's data privacy and reporting guideline.
	Genetic Ancestry Group	Total number of participants	Number of Carriers	Carrier Prevalence
	ACM
	European	234353	345	0.00147
	African	84148	195	0.00231
	Admixed American	79106	78	0.00099
	East Asian	10099	< 20 *	< 0.2% *
	Middle Eastern	1545	< 20 *	< 1.3% *
	South Asian	5579	< 20 *	< 0.36% *
	Overall	414830	< 678 *	< 0.16% *
	DCM
	European	234353	1108	0.00473
	African	84148	475	0.00564
	Admixed American	79106	338	0.00427
	East Asian	10099	60	0.00592
	Middle Eastern	1545	< 20 *	< 1.29% *
	South Asian	5579	45	0.00798
	Overall	414830	< 2,046 *	< 0.49% *
	HCM
	European	234353	655	0.00279
	African	84148	212	0.00252
	Admixed American	79106	187	0.00236
	East Asian	10099	31	0.00305
	Middle Eastern	1545	< 20 *	< 1.29% *
	South Asian	5579	25	0.00438
	Overall	414830	< 1130 *	< 0.27% *

## Sheet: gene_variant_anc_prev
Supplemental Table S7B: Gene and variant level-specific carrier prevalence estimates, stratified by genetic ancestry. *prevalence percentage have been modified to be compliant with AoU's data privacy and reporting guideline.
variant	prevalence_perc*	ancestry	annotation	gene	classification	type
11-47342698-G-A	< 0.05	eur	c.1504C>T_p.Arg502Trp	MYBPC3	LIKELY_PATHOGENIC	missense_variant
2-178532669-C-CCCCAA	< 0.05	afr	c.103945_103946insTTGGG_p.Arg34649LeufsTer25	TTN	PATHOGENIC	frameshift_variant
2-178532670-GGT-G	< 0.05	afr	c.103943_103944del_p.Tyr34648SerfsTer3	TTN	LIKELY_PATHOGENIC	frameshift_variant
2-178589849-G-A	< 0.05	eur	c.61876C>T_p.Arg20626Ter	TTN	PATHOGENIC	stop_gained
12-32802557-C-G	< 0.05	eur	c.2014-1G>C_p.?	PKP2	PATHOGENIC	splice_acceptor_variant
11-47333189-C-G	< 0.05	afr	c.3330+5G>C_p.?	MYBPC3	PATHOGENIC	splice_donor_5th_base_variant
11-47351507-T-C	< 0.05	eur	c.26-2A>G_p.?	MYBPC3	PATHOGENIC	splice_acceptor_variant
12-32877908-C-CAG	< 0.05	eur	c.971_972insCT_p.Ala325TrpfsTer28	PKP2	PATHOGENIC	frameshift_variant
11-47342578-C-G	< 0.05	eur	c.1624G>C_p.Glu542Gln	MYBPC3	LIKELY_PATHOGENIC	splice_region_variant|missense_variant
12-32802499-GGGTGT-G	< 0.05	eur	c.2066_2070del_p.His689ProfsTer8	PKP2	PATHOGENIC	frameshift_variant
14-23424842-C-T	< 0.05	afr	c.2606G>A_p.Arg869His	MYH7	LIKELY_PATHOGENIC	missense_variant
2-178559309-A-T	< 0.05	eur	c.86821+2T>A_p.?	TTN	PATHOGENIC	splice_donor_variant
12-32841072-AC-A	< 0.05	amr	c.1511del_p.Gly504ValfsTer15	PKP2	PATHOGENIC	frameshift_variant
3-38580945-C-A	< 0.05	afr	c.3214G>T_p.Glu1072Ter	SCN5A	LIKELY_PATHOGENIC	stop_gained
3-46859529-C-T	< 0.05	amr	c.427G>A_p.Glu143Lys	MYL3	LIKELY_PATHOGENIC	missense_variant
12-32877908-C-CAG	< 0.05	afr	c.971_972insCT_p.Ala325TrpfsTer28	PKP2	PATHOGENIC	frameshift_variant
2-178533254-TC-T	< 0.05	eur	c.103360del_p.Glu34454AsnfsTer3	TTN	PATHOGENIC	frameshift_variant
14-23422256-C-T	< 0.05	eur	c.3169G>A_p.Gly1057Ser	MYH7	LIKELY_PATHOGENIC	missense_variant
3-38613773-G-A	< 0.05	afr	c.673C>T_p.Arg225Trp	SCN5A	LIKELY_PATHOGENIC	missense_variant
11-47337729-A-AC	< 0.05	eur	c.2373dup_p.Trp792ValfsTer41	MYBPC3	PATHOGENIC	frameshift_variant
11-47342611-C-G	< 0.05	eur	c.1591G>C_p.Gly531Arg	MYBPC3	LIKELY_PATHOGENIC	missense_variant
12-32850907-G-A	< 0.05	afr	c.1237C>T_p.Arg413Ter	PKP2	PATHOGENIC	stop_gained
12-32879021-G-A	< 0.05	eur	c.235C>T_p.Arg79Ter	PKP2	PATHOGENIC	stop_gained
12-32824163-C-G	< 0.05	afr	c.1557-1G>C_p.?	PKP2	PATHOGENIC	splice_acceptor_variant
12-32896566-TCCGCAGGCTCTTGACTGTCTGG-T	< 0.05	afr	c.144_165del_p.Gln49SerfsTer56	PKP2	PATHOGENIC	frameshift_variant
2-178622768-C-T	< 0.05	eur	c.44816-1G>A_p.?	TTN	PATHOGENIC	splice_acceptor_variant
14-23415651-C-T	< 0.05	eur	c.5135G>A_p.Arg1712Gln	MYH7	LIKELY_PATHOGENIC	missense_variant
14-23422292-G-A	< 0.05	eur	c.3133C>T_p.Arg1045Cys	MYH7	LIKELY_PATHOGENIC	missense_variant
14-23427746-T-C	< 0.05	eur	c.1727A>G_p.His576Arg	MYH7	LIKELY_PATHOGENIC	missense_variant
19-55154082-G-A	< 0.05	eur	c.497C>T_p.Ser166Phe	TNNI3	LIKELY_PATHOGENIC	missense_variant
2-178613158-TA-T	< 0.05	eur	c.49648+2del_p.?	TTN	PATHOGENIC	splice_donor_variant
3-38562422-C-A	< 0.05	eur	c.3953G>T_p.Gly1318Val	SCN5A	LIKELY_PATHOGENIC	missense_variant
11-47333192-A-C	< 0.05	eur	c.3330+2T>G_p.?	MYBPC3	PATHOGENIC	splice_donor_variant
12-32796108-C-T	< 0.05	afr	c.2357+1G>A_p.?	PKP2	PATHOGENIC	splice_donor_variant
12-32850907-G-A	< 0.05	eur	c.1237C>T_p.Arg413Ter	PKP2	PATHOGENIC	stop_gained
2-178570663-G-A	< 0.05	amr	c.75469C>T_p.Arg25157Ter	TTN	PATHOGENIC	stop_gained
11-47341234-GT-G	< 0.05	amr	c.1800del_p.Lys600AsnfsTer2	MYBPC3	PATHOGENIC	frameshift_variant
12-32841103-C-T	< 0.05	eur	c.1481G>A_p.Trp494Ter	PKP2	PATHOGENIC	stop_gained
12-32878041-ACG-A	< 0.05	afr	c.837_838del_p.Val280HisfsTer55	PKP2	PATHOGENIC	frameshift_variant
14-23425316-C-T	< 0.05	eur	c.2389G>A_p.Ala797Thr	MYH7	LIKELY_PATHOGENIC	missense_variant
14-23425814-G-A	< 0.05	eur	c.2167C>T_p.Arg723Cys	MYH7	PATHOGENIC	missense_variant
14-23429037-C-T	< 0.05	eur	c.1325G>A_p.Arg442His	MYH7	LIKELY_PATHOGENIC	missense_variant
19-55154094-C-T	< 0.05	eur	c.485G>A_p.Arg162Gln	TNNI3	LIKELY_PATHOGENIC	missense_variant
2-178568947-T-A	< 0.05	sas	c.77185A>T_p.Lys25729Ter	TTN	PATHOGENIC	stop_gained
2-178768157-T-A	< 0.05	afr	c.9164-2A>T_p.?	TTN	PATHOGENIC	splice_acceptor_variant
6-7580055-C-T	< 0.05	afr	c.3865C>T_p.Gln1289Ter	DSP	LIKELY_PATHOGENIC	stop_gained
1-201364357-G-A	< 0.05	eur	c.430C>T_p.Arg144Trp	TNNT2	PATHOGENIC	missense_variant
11-47332075-G-A	< 0.05	amr	c.3811C>T_p.Arg1271Ter	MYBPC3	PATHOGENIC	stop_gained
14-23425316-C-T	< 0.05	amr	c.2389G>A_p.Ala797Thr	MYH7	LIKELY_PATHOGENIC	missense_variant
14-23432714-G-A	< 0.05	eur	c.427C>T_p.Arg143Trp	MYH7	LIKELY_PATHOGENIC	missense_variant
2-178539764-CCT-C	< 0.05	eur	c.98299_98300del_p.Arg32767GlyfsTer2	TTN	PATHOGENIC	frameshift_variant
2-178769678-C-T	< 0.05	eur	c.8902+1G>A_p.?	TTN	PATHOGENIC	splice_donor_variant
3-38550904-TCAGA-T	< 0.05	amr	c.5461_5464del_p.Glu1822HisfsTer10	SCN5A	LIKELY_PATHOGENIC	frameshift_variant
3-38551519-GAGA-G	< 0.05	eur	c.4842CTT[2];[1]_p.Phe1615[2];[1]	SCN5A	LIKELY_PATHOGENIC	inframe_deletion
11-47333552-C-T	< 0.05	amr	c.3190+5G>A_p.?	MYBPC3	PATHOGENIC	splice_donor_5th_base_variant
11-47337534-C-T	< 0.05	eur	c.2459G>A_p.Arg820Gln	MYBPC3	PATHOGENIC	missense_variant
11-47342574-T-A	< 0.05	eur	c.1624+4A>T_p.?	MYBPC3	PATHOGENIC	intron_variant|splice_region_variant
14-23424112-T-C	< 0.05	eur	c.2717A>G_p.Asp906Gly	MYH7	LIKELY_PATHOGENIC	missense_variant
11-47342578-C-G	< 0.05	amr	c.1624G>C_p.Glu542Gln	MYBPC3	LIKELY_PATHOGENIC	splice_region_variant|missense_variant
11-47342611-C-G	< 0.05	amr	c.1591G>C_p.Gly531Arg	MYBPC3	LIKELY_PATHOGENIC	missense_variant
14-23424107-G-C	< 0.05	eur	c.2722C>G_p.Leu908Val	MYH7	LIKELY_PATHOGENIC	missense_variant
14-23426833-C-T	< 0.05	eur	c.1988G>A_p.Arg663His	MYH7	LIKELY_PATHOGENIC	missense_variant
18-31521245-T-C	< 0.05	eur	c.523+2T>C_p.?	DSG2	PATHOGENIC	splice_donor_variant
2-178530809-GT-G	< 0.05	eur	c.105805del_p.Thr35269GlnfsTer24	TTN	LIKELY_PATHOGENIC	frameshift_variant
2-178532910-T-A	< 0.05	amr	c.103705A>T_p.Lys34569Ter	TTN	LIKELY_PATHOGENIC	stop_gained
2-178570990-ATTCT-A	< 0.05	amr	c.75138_75141del_p.Lys25046AsnfsTer8	TTN	PATHOGENIC	frameshift_variant
2-178609207-C-T	< 0.05	amr	c.52102+1G>A_p.?	TTN	PATHOGENIC	splice_donor_variant
2-178636764-C-A	< 0.05	amr	c.40963G>T_p.Glu13655Ter	TTN	PATHOGENIC	stop_gained
2-178640540-C-A	< 0.05	amr	c.40723+1G>T_p.?	TTN	PATHOGENIC	splice_donor_variant
2-178740646-G-T	< 0.05	eur	c.12587C>A_p.Ser4196Ter	TTN	PATHOGENIC	stop_gained
2-178775509-C-A	< 0.05	afr	c.6355G>T_p.Glu2119Ter	TTN	PATHOGENIC	stop_gained
3-38585944-AC-A	< 0.05	afr	c.2533del_p.Val845CysfsTer2	SCN5A	PATHOGENIC	frameshift_variant
3-38605949-A-T	< 0.05	eur	c.1338+2T>A_p.?	SCN5A	PATHOGENIC	splice_donor_variant
3-38613773-G-A	< 0.05	eur	c.673C>T_p.Arg225Trp	SCN5A	LIKELY_PATHOGENIC	missense_variant
6-7574797-T-C	< 0.05	eur	c.2436+2T>C_p.?	DSP	PATHOGENIC	splice_donor_variant
7-128845989-G-C	< 0.05	eur	c.3791-1G>C_p.?	FLNC	PATHOGENIC	splice_acceptor_variant
1-156137207-C-T	< 0.05	eur	c.1583C>T_p.Thr528Met	LMNA	LIKELY_PATHOGENIC	missense_variant
1-201364335-C-T	< 0.05	eur	c.452G>A_p.Arg151Gln	TNNT2	PATHOGENIC	missense_variant
11-47333238-C-A	< 0.05	afr	c.3286G>T_p.Glu1096Ter	MYBPC3	PATHOGENIC	stop_gained
11-47342578-C-G	< 0.05	afr	c.1624G>C_p.Glu542Gln	MYBPC3	LIKELY_PATHOGENIC	splice_region_variant|missense_variant
11-47346379-C-T		eur	c.927-9G>A	MYBPC3	LIKELY_PATHOGENIC	intron_variant
11-47348424-C-T	< 0.05	eur	c.772G>A_p.Glu258Lys	MYBPC3	PATHOGENIC	splice_region_variant|missense_variant
14-23426046-G-A	< 0.05	eur	c.2080C>T_p.Arg694Cys	MYH7	LIKELY_PATHOGENIC	missense_variant
14-23428992-A-G	< 0.05	eur	c.1370T>C_p.Ile457Thr	MYH7	LIKELY_PATHOGENIC	missense_variant
14-23431789-C-T	< 0.05	amr	c.611G>A_p.Arg204His	MYH7	LIKELY_PATHOGENIC	missense_variant
2-178579850-T-G	< 0.05	eur	c.67349-2A>C_p.?	TTN	PATHOGENIC	splice_acceptor_variant
2-178620714-C-A	< 0.05	eur	c.45895+1G>T_p.?	TTN	LIKELY_PATHOGENIC	splice_donor_variant
2-178758982-A-G	< 0.05	eur	c.10303+2T>C_p.?	TTN	PATHOGENIC	splice_donor_variant
2-178777234-CTTTCA-C	< 0.05	eur	c.4724_4728del_p.Met1575SerfsTer6	TTN	PATHOGENIC	frameshift_variant
3-38586037-C-T	< 0.05	eur	c.2441G>A_p.Arg814Gln	SCN5A	LIKELY_PATHOGENIC	missense_variant
3-38606710-G-A	< 0.05	afr	c.1099C>T_p.Arg367Cys	SCN5A	LIKELY_PATHOGENIC	missense_variant
3-52453993-G-A	< 0.05	eur	c.23C>T_p.Ala8Val	TNNC1	LIKELY_PATHOGENIC	splice_region_variant|missense_variant
6-7559281-C-T	< 0.05	eur	c.478C>T_p.Arg160Ter	DSP	PATHOGENIC	stop_gained
1-156135956-G-A	< 0.05	eur	c.992G>A_p.Arg331Gln	LMNA	LIKELY_PATHOGENIC	missense_variant
11-47331882-C-T	< 0.05	afr	c.3815-1G>A_p.?	MYBPC3	PATHOGENIC	splice_acceptor_variant
11-47335081-CAG-C	< 0.05	eur	c.2864_2865del_p.Pro955ArgfsTer95	MYBPC3	PATHOGENIC	frameshift_variant
11-47342698-G-A	< 0.05	afr	c.1504C>T_p.Arg502Trp	MYBPC3	LIKELY_PATHOGENIC	missense_variant
11-47342719-G-C	< 0.05	amr	c.1483C>G_p.Arg495Gly	MYBPC3	LIKELY_PATHOGENIC	missense_variant
11-47346626-C-G	< 0.05	amr	c.926+1G>C_p.?	MYBPC3	PATHOGENIC	splice_donor_variant
11-47351343-CGTGTGCCCTCT-C	< 0.05	eur	c.177_187del_p.Glu60AlafsTer49	MYBPC3	PATHOGENIC	frameshift_variant
12-32841072-AC-A	< 0.05	afr	c.1511del_p.Gly504ValfsTer15	PKP2	PATHOGENIC	frameshift_variant
12-32841207-T-A	< 0.05	afr	c.1379-2A>T_p.?	PKP2	PATHOGENIC	splice_acceptor_variant
12-32878346-C-CA	< 0.05	afr	c.533dup_p.His179AlafsTer37	PKP2	PATHOGENIC	frameshift_variant
12-32896541-A-AG	< 0.05	afr	c.190dup_p.Leu64ProfsTer22	PKP2	PATHOGENIC	frameshift_variant
12-32896580-ACTGT-A	< 0.05	eur	c.148_151del_p.Thr50SerfsTer61	PKP2	PATHOGENIC	frameshift_variant
14-23418234-C-T	< 0.05	eas	c.4145G>A_p.Arg1382Gln	MYH7	LIKELY_PATHOGENIC	missense_variant
14-23422291-C-T	< 0.05	eas	c.3134G>A_p.Arg1045His	MYH7	LIKELY_PATHOGENIC	missense_variant
14-23424840-G-A	< 0.05	eur	c.2608C>T_p.Arg870Cys	MYH7	PATHOGENIC	missense_variant
14-23429038-G-A	< 0.05	afr	c.1324C>T_p.Arg442Cys	MYH7	LIKELY_PATHOGENIC	missense_variant
19-55154082-G-A	< 0.05	afr	c.497C>T_p.Ser166Phe	TNNI3	LIKELY_PATHOGENIC	missense_variant
19-55154095-G-A	< 0.05	eur	c.484C>T_p.Arg162Trp	TNNI3	LIKELY_PATHOGENIC	missense_variant
2-178538834-GT-G	< 0.05	eur	c.98994del_p.Lys32998AsnfsTer63	TTN	PATHOGENIC	frameshift_variant
2-178739472-CT-C	< 0.05	amr	c.13760del_p.Glu4587GlyfsTer5	TTN	LIKELY_PATHOGENIC	frameshift_variant
2-178768099-G-A	< 0.05	eur	c.9220C>T_p.Arg3074Ter	TTN	PATHOGENIC	stop_gained
3-38551022-C-T	< 0.05	eur	c.5347G>A_p.Glu1783Lys	SCN5A	PATHOGENIC	missense_variant
3-38562422-C-A	< 0.05	afr	c.3953G>T_p.Gly1318Val	SCN5A	LIKELY_PATHOGENIC	missense_variant
3-38606682-C-T	< 0.05	eur	c.1127G>A_p.Arg376His	SCN5A	LIKELY_PATHOGENIC	missense_variant
6-7542041-T-G	< 0.05	eur	c.126T>G_p.Tyr42Ter	DSP	PATHOGENIC	stop_gained
6-7579922-G-GGAAAATC	< 0.05	eur	c.3735_3741dup_p.Asp1248LysfsTer7	DSP	PATHOGENIC	frameshift_variant
6-7580721-C-T	< 0.05	eur	c.4531C>T_p.Gln1511Ter	DSP	LIKELY_PATHOGENIC	stop_gained
7-128846129-C-CACCT	< 0.05	afr	c.3934_3937dup_p.Arg1313LeufsTer20	FLNC	LIKELY_PATHOGENIC	frameshift_variant
11-47339792-T-C	< 0.05	eur	c.1928-2A>G_p.?	MYBPC3	PATHOGENIC	splice_acceptor_variant
11-47347668-TC-T	< 0.05	eur	c.833del_p.Gly278GlufsTer22	MYBPC3	PATHOGENIC	frameshift_variant
11-47347856-C-T	< 0.05	eur	c.821+1G>A_p.?	MYBPC3	PATHOGENIC	splice_donor_variant
12-32796108-C-T	< 0.05	eur	c.2357+1G>A_p.?	PKP2	PATHOGENIC	splice_donor_variant
12-32802499-GGGTGT-G	< 0.05	afr	c.2066_2070del_p.His689ProfsTer8	PKP2	PATHOGENIC	frameshift_variant
12-32822526-G-A	< 0.05	eur	c.1780C>T_p.Gln594Ter	PKP2	PATHOGENIC	stop_gained
12-32850975-T-C	< 0.05	afr	c.1171-2A>G_p.?	PKP2	PATHOGENIC	splice_acceptor_variant
12-32878256-TG-T	< 0.05	afr	c.623del_p.Thr208LysfsTer55	PKP2	PATHOGENIC	frameshift_variant
14-23417174-G-A	< 0.05	eur	c.4498C>T_p.Arg1500Trp	MYH7	LIKELY_PATHOGENIC	missense_variant
14-23418234-C-T	< 0.05	eur	c.4145G>A_p.Arg1382Gln	MYH7	LIKELY_PATHOGENIC	missense_variant
14-23424839-C-T	< 0.05	eur	c.2609G>A_p.Arg870His	MYH7	PATHOGENIC	missense_variant
14-23425316-C-T	< 0.05	afr	c.2389G>A_p.Ala797Thr	MYH7	LIKELY_PATHOGENIC	missense_variant
14-23428587-C-A	< 0.05	eur	c.1491G>T_p.Glu497Asp	MYH7	LIKELY_PATHOGENIC	missense_variant
15-63064133-T-C	< 0.05	afr	c.842T>C_p.Met281Thr	TPM1	LIKELY_PATHOGENIC	missense_variant
19-55151881-C-T	< 0.05	afr	c.586G>A_p.Asp196Asn	TNNI3	LIKELY_PATHOGENIC	missense_variant
19-55154145-C-T	< 0.05	eur	c.434G>A_p.Arg145Gln	TNNI3	PATHOGENIC	missense_variant
19-55154146-G-A	< 0.05	afr	c.433C>T_p.Arg145Trp	TNNI3	PATHOGENIC	missense_variant
2-178542803-C-CT	< 0.05	eur	c.97050dup_p.Glu32351ArgfsTer6	TTN	PATHOGENIC	frameshift_variant
2-178549309-G-A	< 0.05	eur	c.92317C>T_p.Arg30773Ter	TTN	PATHOGENIC	stop_gained
2-178553913-C-G	< 0.05	eur	c.89197+1G>C_p.?	TTN	PATHOGENIC	splice_donor_variant
2-178554217-CTATT-C	< 0.05	eur	c.88895-5_88895-2del_p.?	TTN	PATHOGENIC	splice_acceptor_variant
2-178559797-G-A	< 0.05	eur	c.86335C>T_p.Arg28779Ter	TTN	PATHOGENIC	stop_gained
2-178563058-TAGCACTTGCA-T	< 0.05	eur	c.83064_83073del_p.Ala27689LeufsTer31	TTN	LIKELY_PATHOGENIC	frameshift_variant
2-178564096-G-A	< 0.05	eur	c.82036C>T_p.Gln27346Ter	TTN	PATHOGENIC	stop_gained
2-178568469-AGAGTTACAATT-A	< 0.05	eur	c.77652_77662del_p.Glu25884AspfsTer3	TTN	LIKELY_PATHOGENIC	frameshift_variant
2-178568482-CGA-C	< 0.05	eur	c.77648_77649del_p.Ile25883ArgfsTer7	TTN	LIKELY_PATHOGENIC	frameshift_variant
2-178568485-TG-T	< 0.05	eur	c.77646del_p.Ile25883SerfsTer4	TTN	LIKELY_PATHOGENIC	frameshift_variant
2-178578804-A-G	< 0.05	afr	c.68224+2T>C_p.?	TTN	LIKELY_PATHOGENIC	splice_donor_variant
2-178578805-C-T	< 0.05	eur	c.68224+1G>A_p.?	TTN	PATHOGENIC	splice_donor_variant
2-178598042-AC-A	< 0.05	afr	c.57127del_p.Val19043Ter	TTN	LIKELY_PATHOGENIC	frameshift_variant|stop_gained
2-178605064-TC-T	< 0.05	eur	c.54112del_p.Glu18038ArgfsTer47	TTN	LIKELY_PATHOGENIC	frameshift_variant
2-178618695-G-A	< 0.05	amr	c.46855C>T_p.Gln15619Ter	TTN	LIKELY_PATHOGENIC	stop_gained
2-219421364-C-T	< 0.05	afr	c.1048C>T_p.Arg350Trp	DES	PATHOGENIC	missense_variant
3-38551477-C-T	< 0.05	afr	c.4892G>A_p.Arg1631His	SCN5A	LIKELY_PATHOGENIC	missense_variant
3-38551477-C-T	< 0.05	eur	c.4892G>A_p.Arg1631His	SCN5A	LIKELY_PATHOGENIC	missense_variant
3-38557248-C-A	< 0.05	eas	c.4279G>T_p.Ala1427Ser	SCN5A	LIKELY_PATHOGENIC	missense_variant
3-38580945-C-A	< 0.05	amr	c.3214G>T_p.Glu1072Ter	SCN5A	LIKELY_PATHOGENIC	stop_gained
3-38613772-C-T	< 0.05	eas	c.674G>A_p.Arg225Gln	SCN5A	LIKELY_PATHOGENIC	missense_variant
3-52453993-G-A	< 0.05	afr	c.23C>T_p.Ala8Val	TNNC1	LIKELY_PATHOGENIC	splice_region_variant|missense_variant
6-7542041-T-G	< 0.05	amr	c.126T>G_p.Tyr42Ter	DSP	PATHOGENIC	stop_gained
6-7575294-G-C	< 0.05	eur	c.2437-1G>C_p.?	DSP	PATHOGENIC	splice_acceptor_variant
6-7583758-C-T	< 0.05	eur	c.6496C>T_p.Arg2166Ter	DSP	PATHOGENIC	stop_gained
7-128849579-G-T	< 0.05	eur	c.5199+1G>T_p.?	FLNC	PATHOGENIC	splice_donor_variant
