# Supplementary material
Source: Research Square preprint supplement (doi:10.21203/rs.3.rs-9581360/v1)
Supplement: Supplementary file 5 [file e22b14a77426ba428b41a91c.xlsx]

## Sheet: Heart Failure
Supplemental Table S2: ICD-9, ICD10, and CPT codes used for phenotype ascertainment
source_concept_name	source_concept_code	source_vocabulary
Right heart failure, unspecified	I50.810	ICD10CM
Hypertensive heart and chronic kidney disease, unspecified, with heart failure and chronic kidney disease stage V or end stage renal disease	404.93	ICD9CM
Left heart failure	428.1	ICD9CM
Combined systolic and diastolic heart failure, unspecified	428.40	ICD9CM
Acute on chronic combined systolic and diastolic heart failure	428.43	ICD9CM
End stage heart failure	I50.84	ICD10CM
Diastolic heart failure, unspecified	428.30	ICD9CM
Hypertensive heart and chronic kidney disease, benign, with heart failure and chronic kidney disease stage V or end stage renal disease	404.13	ICD9CM
Hypertensive heart and chronic kidney disease, unspecified, with heart failure and with chronic kidney disease stage I through stage IV, or unspecified	404.91	ICD9CM
Acute systolic heart failure	428.21	ICD9CM
Chronic right heart failure	I50.812	ICD10CM
Acute systolic (congestive) heart failure	I50.21	ICD10CM
Benign hypertensive heart disease with heart failure	402.11	ICD9CM
Systolic heart failure, unspecified	428.20	ICD9CM
Heart failure, unspecified	428.9	ICD9CM
Unspecified hypertensive heart disease with heart failure	402.91	ICD9CM
Left ventricular failure, unspecified	I50.1	ICD10CM
Acute on chronic diastolic heart failure	428.33	ICD9CM
High output heart failure	I50.83	ICD10CM
Acute on chronic systolic heart failure	428.23	ICD9CM
Acute diastolic heart failure	428.31	ICD9CM
Chronic diastolic heart failure	428.32	ICD9CM
Acute on chronic combined systolic (congestive) and diastolic (congestive) heart failure	I50.43	ICD10CM
Hypertensive heart and chronic kidney disease with heart failure and with stage 5 chronic kidney disease, or end stage renal disease	I13.2	ICD10CM
Acute combined systolic and diastolic heart failure	428.41	ICD9CM
Diastolic (congestive) heart failure	I50.3	ICD10CM
Chronic combined systolic and diastolic heart failure	428.42	ICD9CM
Biventricular heart failure	I50.82	ICD10CM
Chronic systolic heart failure	428.22	ICD9CM
Unspecified combined systolic (congestive) and diastolic (congestive) heart failure	I50.40	ICD10CM
Acute on chronic systolic (congestive) heart failure	I50.23	ICD10CM
Acute diastolic (congestive) heart failure	I50.31	ICD10CM
Chronic combined systolic (congestive) and diastolic (congestive) heart failure	I50.42	ICD10CM
Acute on chronic diastolic (congestive) heart failure	I50.33	ICD10CM
Unspecified diastolic (congestive) heart failure	I50.30	ICD10CM
Congestive heart failure, unspecified	428.0	ICD9CM
Unspecified systolic (congestive) heart failure	I50.20	ICD10CM
Heart failure, unspecified	I50.9	ICD10CM
Hypertensive heart disease with heart failure	I11.0	ICD10CM
Chronic diastolic (congestive) heart failure	I50.32	ICD10CM
Hypertensive heart and chronic kidney disease with heart failure and stage 1 through stage 4 chronic kidney disease, or unspecified chronic kidney disease	I13.0	ICD10CM
Chronic systolic (congestive) heart failure	I50.22	ICD10CM
Acute combined systolic (congestive) and diastolic (congestive) heart failure	I50.41	ICD10CM
Acute right heart failure	I50.811	ICD10CM
Hypertensive heart and chronic kidney disease, malignant, with heart failure and with chronic kidney disease stage I through stage IV, or unspecified	404.01	ICD9CM
Acute on chronic right heart failure	I50.813	ICD10CM
Right heart failure due to left heart failure	I50.814	ICD10CM
Other heart failure	I50.89	ICD10CM
Hypertensive heart and chronic kidney disease, malignant, with heart failure and with chronic kidney disease stage V or end stage renal disease	404.03	ICD9CM
Malignant hypertensive heart disease with heart failure	402.01	ICD9CM
Hypertensive heart and chronic kidney disease, benign, with heart failure and with chronic kidney disease stage I through stage IV, or unspecified	404.11	ICD9CM
Systolic (congestive) heart failure	I50.2	ICD10CM
Right heart failure	I50.81	ICD10CM
Systolic heart failure	428.2	ICD9CM
Diastolic heart failure	428.3	ICD9CM

## Sheet: Non-ischemic cardiomyopathy
Supplemental Table S2: ICD-9, ICD10, and CPT codes used for phenotype ascertainment
source_concept_name	source_concept_code	source_vocabulary
Cardiomyopathy in other diseases classified elsewhere	425.8	ICD9CM
Obstructive hypertrophic cardiomyopathy	I42.1	ICD10CM
Hypertrophic obstructive cardiomyopathy	425.11	ICD9CM
Hypertrophic cardiomyopathy	425.1	ICD9CM
Other hypertrophic cardiomyopathy	I42.2	ICD10CM
Other cardiomyopathies	I42.8	ICD10CM
Cardiomyopathy, unspecified	I42.9	ICD10CM
Dilated cardiomyopathy	I42.0	ICD10CM
Other restrictive cardiomyopathy	I42.5	ICD10CM
Other primary cardiomyopathies	425.4	ICD9CM
Other hypertrophic cardiomyopathy	425.18	ICD9CM

## Sheet: Coronary artery disease
Supplemental Table S2: ICD-9, ICD10, and CPT codes used for phenotype ascertainment
source_concept_name	source_concept_code	source_vocabulary
Acute coronary occlusion without myocardial infarction	411.81	ICD9CM
Acute myocardial infarction of other specified sites, initial episode of care	410.81	ICD9CM
Acute myocardial infarction of other anterior wall, subsequent episode of care	410.12	ICD9CM
ST elevation (STEMI) myocardial infarction involving left circumflex coronary artery	I21.21	ICD10CM
Acute myocardial infarction of other anterior wall, initial episode of care	410.11	ICD9CM
Acute myocardial infarction, unspecified site	410.9	ICD9CM
Acute myocardial infarction of other inferior wall, episode of care unspecified	410.40	ICD9CM
Acute myocardial infarction of unspecified site, initial episode of care	410.91	ICD9CM
Subendocardial infarction, episode of care unspecified	410.70	ICD9CM
ST elevation (STEMI) myocardial infarction of unspecified site	I21.3	ICD10CM
Myocardial infarction type 2	I21.A1	ICD10CM
Acute myocardial infarction of other inferior wall, initial episode of care	410.41	ICD9CM
Acute myocardial infarction of inferolateral wall, initial episode of care	410.21	ICD9CM
Subendocardial infarction, subsequent episode of care	410.72	ICD9CM
ST elevation (STEMI) myocardial infarction involving left main coronary artery	I21.01	ICD10CM
Acute myocardial infarction of other anterior wall, episode of care unspecified	410.10	ICD9CM
Acute myocardial infarction of inferoposterior wall, initial episode of care	410.31	ICD9CM
ST elevation (STEMI) myocardial infarction involving other coronary artery of anterior wall	I21.09	ICD10CM
Thrombosis of atrium, auricular appendage, and ventricle as current complications following acute myocardial infarction	I23.6	ICD10CM
Dressler's syndrome	I24.1	ICD10CM
Other acute and subacute forms of ischemic heart disease, other	411.89	ICD9CM
Acute myocardial infarction of unspecified site, subsequent episode of care	410.92	ICD9CM
Intermediate coronary syndrome	411.1	ICD9CM
Postmyocardial infarction syndrome	411.0	ICD9CM
ST elevation (STEMI) myocardial infarction involving other coronary artery of inferior wall	I21.19	ICD10CM
ST elevation (STEMI) myocardial infarction involving right coronary artery	I21.11	ICD10CM
Acute myocardial infarction of anterolateral wall, episode of care unspecified	410.00	ICD9CM
Ischemic cardiomyopathy	I25.5	ICD10CM
Old myocardial infarction	412	ICD9CM
Subendocardial infarction, initial episode of care	410.71	ICD9CM
Acute myocardial infarction of unspecified site, episode of care unspecified	410.90	ICD9CM
Old myocardial infarction	I25.2	ICD10CM
Acute myocardial infarction, unspecified	I21.9	ICD10CM
ST elevation (STEMI) myocardial infarction involving left anterior descending coronary artery	I21.02	ICD10CM
Acute myocardial infarction, of other specified sites	410.8	ICD9CM
Non-ST elevation (NSTEMI) myocardial infarction	I21.4	ICD10CM
ST elevation (STEMI) myocardial infarction involving other sites	I21.29	ICD10CM
Acute myocardial infarction of anterolateral wall, initial episode of care	410.01	ICD9CM
Acute myocardial infarction of other inferior wall, subsequent episode of care	410.42	ICD9CM
Subsequent ST elevation (STEMI) myocardial infarction of other sites	I22.8	ICD10CM
Subsequent ST elevation (STEMI) myocardial infarction of inferior wall	I22.1	ICD10CM
Acute myocardial infarction of inferoposterior wall, episode of care unspecified	410.30	ICD9CM
Acute myocardial infarction	I21	ICD10CM
Acute myocardial infarction of other lateral wall, subsequent episode of care	410.52	ICD9CM
Other myocardial infarction type	I21.A9	ICD10CM
Acute myocardial infarction of other specified sites, episode of care unspecified	410.80	ICD9CM
Acute myocardial infarction, of other anterior wall	410.1	ICD9CM
True posterior wall infarction, episode of care unspecified	410.60	ICD9CM
Acute myocardial infarction of other lateral wall, initial episode of care	410.51	ICD9CM
Acute myocardial infarction, of anterolateral wall	410.0	ICD9CM
Rupture of cardiac wall without hemopericardium as current complication following acute myocardial infarction	I23.3	ICD10CM
Other current complications following acute myocardial infarction	I23.8	ICD10CM
Acute myocardial infarction of inferolateral wall, episode of care unspecified	410.20	ICD9CM
Acute myocardial infarction of other specified sites, subsequent episode of care	410.82	ICD9CM
Acute myocardial infarction of anterolateral wall, subsequent episode of care	410.02	ICD9CM
True posterior wall infarction, initial episode of care	410.61	ICD9CM
Other acute and subacute forms of ischemic heart disease	411	ICD9CM
Subsequent non-ST elevation (NSTEMI) myocardial infarction	I22.2	ICD10CM
Acute myocardial infarction of inferoposterior wall, subsequent episode of care	410.32	ICD9CM
Rupture of papillary muscle as current complication following acute myocardial infarction	I23.5	ICD10CM
Subsequent ST elevation (STEMI) myocardial infarction of anterior wall	I22.0	ICD10CM
Acute myocardial infarction of inferolateral wall, subsequent episode of care	410.22	ICD9CM
ST elevation (STEMI) myocardial infarction of anterior wall	I21.0	ICD10CM
Acute myocardial infarction of other lateral wall, episode of care unspecified	410.50	ICD9CM
Postinfarction angina	I23.7	ICD10CM
Other acute and subacute forms of ischemic heart disease	411.8	ICD9CM
Ventricular septal defect as current complication following acute myocardial infarction	I23.2	ICD10CM
Subsequent ST elevation (STEMI) myocardial infarction of unspecified site	I22.9	ICD10CM
Acute myocardial infarction, of other lateral wall	410.5	ICD9CM
Acute myocardial infarction, of other inferior wall	410.4	ICD9CM
Atrial septal defect as current complication following acute myocardial infarction	I23.1	ICD10CM
Other type of myocardial infarction	I21.A	ICD10CM
Acute myocardial infarction, of inferoposterior wall	410.3	ICD9CM
Acute myocardial infarction	410	ICD9CM
True posterior wall infarction, subsequent episode of care	410.62	ICD9CM
Rupture of chordae tendineae as current complication following acute myocardial infarction	I23.4	ICD10CM
Single vessel percutaneous transluminal coronary angioplasty [PTCA] or coronary atherectomy with mention of thrombolytic agent	36.02	ICD9Proc
Percutaneous transcatheter placement of intracoronary stent(s), with coronary angioplasty when performed; each additional branch of a major coronary artery (List separately in addition to code for primary procedure)	92929	CPT4
Transcatheter placement of an intracoronary stent(s), percutaneous, with or without other therapeutic intervention, any method; each additional vessel (List separately in addition to code for primary procedure)	92981	CPT4
Percutaneous transluminal coronary atherectomy, with intracoronary stent, with coronary angioplasty when performed; each additional branch of a major coronary artery (List separately in addition to code for primary procedure)	92934	CPT4
Percutaneous transluminal coronary atherectomy, with intracoronary stent, with coronary angioplasty when performed; single major coronary artery or branch	92933	CPT4
Harvest of upper extremity artery, 1 segment, for coronary artery bypass procedure, endoscopic	33509	CPT4
Harvest of upper extremity artery, 1 segment, for coronary artery bypass procedure, open	35600	CPT4
Reoperation, coronary artery bypass procedure or valve procedure, more than 1 month after original operation (List separately in addition to code for primary procedure)	33530	CPT4
Anesthesia for direct coronary artery bypass grafting; without pump oxygenator	00566	CPT4
Percutaneous transluminal revascularization of chronic total occlusion, coronary artery, coronary artery branch, or coronary artery bypass graft, any combination of intracoronary stent, atherectomy and angioplasty; each additional coronary artery, coronar	92944	CPT4
Percutaneous transluminal coronary atherectomy, with coronary angioplasty when performed; single major coronary artery or branch	92924	CPT4
Multiple vessel percutaneous transluminal coronary angioplasty [PTCA] or coronary atherectomy performed during the same operation, with or without mention of thrombolytic agent	36.05	ICD9Proc
Anesthesia for direct coronary artery bypass grafting; with pump oxygenator	00567	CPT4
Percutaneous transluminal coronary angioplasty; each additional branch of a major coronary artery (List separately in addition to code for primary procedure)	92921	CPT4
Single internal mammary-coronary artery bypass	36.15	ICD9Proc
Single vessel percutaneous transluminal coronary angioplasty [PTCA] or coronary atherectomy without mention of thrombolytic agent	36.01	ICD9Proc
Percutaneous transluminal coronary angioplasty [PTCA]	00.66	ICD9Proc
Percutaneous transluminal revascularization of chronic total occlusion, coronary artery, coronary artery branch, or coronary artery bypass graft, any combination of intracoronary stent, atherectomy and angioplasty; single vessel	92943	CPT4
Transcatheter placement of an intracoronary stent(s), percutaneous, with or without other therapeutic intervention, any method; single vessel	92980	CPT4
Percutaneous transcatheter placement of intracoronary stent(s), with coronary angioplasty when performed; single major coronary artery or branch	92928	CPT4
Harvest of upper extremity vein, 1 segment, for lower extremity or coronary artery bypass procedure (List separately in addition to code for primary procedure)	35500	CPT4
Percutaneous transluminal revascularization of or through coronary artery bypass graft (internal mammary, free arterial, venous), any combination of intracoronary stent, atherectomy and angioplasty, including distal protection when performed; each additio	92938	CPT4
Endoscopy, surgical, including video-assisted harvest of vein(s) for coronary artery bypass procedure (List separately in addition to code for primary procedure)	33508	CPT4
Percutaneous transluminal revascularization of acute total/subtotal occlusion during acute myocardial infarction, coronary artery or coronary artery bypass graft, any combination of intracoronary stent, atherectomy and angioplasty, including aspiration th	92941	CPT4
Percutaneous transluminal coronary angioplasty; single major coronary artery or branch	92920	CPT4
Percutaneous transluminal revascularization of or through coronary artery bypass graft (internal mammary, free arterial, venous), any combination of intracoronary stent, atherectomy and angioplasty, including distal protection when performed; single vesse	92937	CPT4
Coronary endarterectomy, open, any method, of left anterior descending, circumflex, or right coronary artery performed in conjunction with coronary artery bypass graft procedure, each vessel (List separately in addition to primary procedure)	33572	CPT4
Double internal mammary-coronary artery bypass	36.16	ICD9Proc
Percutaneous transluminal coronary atherectomy, with coronary angioplasty when performed; each additional branch of a major coronary artery (List separately in addition to code for primary procedure)	92925	CPT4

## Sheet: Arrhythmia
Supplemental Table S2: ICD-9, ICD10, and CPT codes used for phenotype ascertainment
source_concept_name	source_concept_code	source_vocabulary
Left bundle branch hemiblock	426.2	ICD9CM
Left anterior fascicular block	I44.4	ICD10CM
Conduction disorder, unspecified	426.9	ICD9CM
Right bundle branch block and left anterior fascicular block	426.52	ICD9CM
Other left bundle branch block	426.3	ICD9CM
Cardiac arrest, cause unspecified	I46.9	ICD10CM
Right bundle branch block	426.4	ICD9CM
Ventricular tachycardia, unspecified	I47.20	ICD10CM
First degree atrioventricular block	426.11	ICD9CM
Ventricular fibrillation	I49.01	ICD10CM
Nonspecific intraventricular block	I45.4	ICD10CM
Cardiac arrest	427.5	ICD9CM
Re-entry ventricular arrhythmia	I47.0	ICD10CM
Long QT syndrome	I45.81	ICD10CM
Atrioventricular block, complete	426.0	ICD9CM
Other specified conduction disorders	426.89	ICD9CM
Atrioventricular block, second degree	I44.1	ICD10CM
Ventricular fibrillation	427.41	ICD9CM
Other specified conduction disorders	I45.89	ICD10CM
Longstanding persistent atrial fibrillation	I48.11	ICD10CM
Ventricular flutter	427.42	ICD9CM
Persistent atrial fibrillation	I48.1	ICD10CM
Anomalous atrioventricular excitation	426.7	ICD9CM
Pre-excitation syndrome	I45.6	ICD10CM
Other specified heart block	I45.5	ICD10CM
Permanent atrial fibrillation	I48.21	ICD10CM
Unspecified right bundle-branch block	I45.10	ICD10CM
Atrioventricular block, complete	I44.2	ICD10CM
Bundle branch block, unspecified	426.50	ICD9CM
Other second degree atrioventricular block	426.13	ICD9CM
Atrioventricular block, unspecified	426.10	ICD9CM
Other cardiac arrhythmias	I49	ICD10CM
Trifascicular block	I45.3	ICD10CM
Other ventricular tachycardia	I47.29	ICD10CM
Paroxysmal ventricular tachycardia	427.1	ICD9CM
Other atrioventricular block	I44.39	ICD10CM
Left bundle-branch block, unspecified	I44.7	ICD10CM
Other premature depolarization	I49.49	ICD10CM
Other specified cardiac arrhythmias	I49.8	ICD10CM
Atrial flutter	427.32	ICD9CM
Atrial premature depolarization	I49.1	ICD10CM
Long QT syndrome	426.82	ICD9CM
Other conduction disorders	I45	ICD10CM
Sick sinus syndrome	I49.5	ICD10CM
Chronic atrial fibrillation	I48.2	ICD10CM
Chronic atrial fibrillation, unspecified	I48.20	ICD10CM
Bifascicular block	I45.2	ICD10CM
Atypical atrial flutter	I48.4	ICD10CM
Typical atrial flutter	I48.3	ICD10CM
Mobitz (type) II atrioventricular block	426.12	ICD9CM
Ventricular premature depolarization	I49.3	ICD10CM
Atrial fibrillation and flutter	I48	ICD10CM
Other bilateral bundle branch block	426.53	ICD9CM
Unspecified atrioventricular block	I44.30	ICD10CM
Other persistent atrial fibrillation	I48.19	ICD10CM
Cardiac arrhythmia, unspecified	I49.9	ICD10CM
Atrioventricular block, first degree	I44.0	ICD10CM
Atrial fibrillation	427.31	ICD9CM
Paroxysmal atrial fibrillation	I48.0	ICD10CM
Unspecified premature depolarization	I49.40	ICD10CM
Ventricular tachycardia	I47.2	ICD10CM
Unspecified atrial fibrillation	I48.91	ICD10CM
Other heart block	426.6	ICD9CM
Unspecified atrial flutter	I48.92	ICD10CM
Conduction disorder, unspecified	I45.9	ICD10CM
Other right bundle-branch block	I45.19	ICD10CM
Unspecified fascicular block	I44.60	ICD10CM
Right fascicular block	I45.0	ICD10CM
Left posterior fascicular block	I44.5	ICD10CM
Atrioventricular block, other and unspecified	426.1	ICD9CM
Lown-Ganong-Levine syndrome	426.81	ICD9CM
Right bundle branch block and left posterior fascicular block	426.51	ICD9CM
Junctional premature depolarization	I49.2	ICD10CM
Ventricular fibrillation and flutter	I49.0	ICD10CM
Torsades de pointes	I47.21	ICD10CM
Trifascicular block	426.54	ICD9CM
Atrioventricular and left bundle-branch block	I44	ICD10CM
Ventricular flutter	I49.02	ICD10CM
Other fascicular block	I44.69	ICD10CM
Conduction disorders	426	ICD9CM
Other and unspecified premature depolarization	I49.4	ICD10CM
Unspecified atrial fibrillation and atrial flutter	I48.9	ICD10CM
Intraventricular and/or intra-atrial mapping of tachycardia site(s) with catheter manipulation to record from multiple sites to identify origin of tachycardia (List separately in addition to code for primary procedure)	93609	CPT4
Comprehensive electrophysiologic evaluation with right atrial pacing and recording, right ventricular pacing and recording, His bundle recording, including insertion and repositioning of multiple electrode catheters, without induction or attempted inducti	93619	CPT4
Intracardiac catheter ablation of arrhythmogenic focus; for treatment of supraventricular tachycardia by ablation of fast or slow atrioventricular pathways, accessory atrioventricular connections or other atrial foci, singly or in combination	93651	CPT4
Electrophysiologic evaluation of single or dual chamber pacing cardioverter-defibrillator leads including defibrillation threshold evaluation (induction of arrhythmia, evaluation of sensing and pacing for arrhythmia termination) at time of initial implant	93640	CPT4
Intraventricular pacing	93612	CPT4
Programming device evaluation (in person) with iterative adjustment of the implantable device to test the function of the device and select optimal permanent programmed values with analysis, review and report by a physician or other qualified health care	93279	CPT4
Intracardiac catheter ablation of a discrete mechanism of arrhythmia which is distinct from the primary ablated mechanism, including repeat diagnostic maneuvers, to treat a spontaneous or induced arrhythmia (List separately in addition to code for primary	93655	CPT4
Comprehensive electrophysiologic evaluation with insertion and repositioning of multiple electrode catheters, induction or attempted induction of an arrhythmia with right atrial pacing and recording and catheter ablation of arrhythmogenic focus, including	93653	CPT4
Intra-atrial pacing	93610	CPT4
Comprehensive electrophysiologic evaluation including transseptal catheterizations, insertion and repositioning of multiple electrode catheters with intracardiac catheter ablation of atrial fibrillation by pulmonary vein isolation, including intracardiac	93656	CPT4
Comprehensive electrophysiologic evaluation including insertion and repositioning of multiple electrode catheters with induction or attempted induction of arrhythmia; with right atrial pacing and recording, right ventricular pacing and recording, His bund	93620	CPT4
Programming device evaluation (in person) with iterative adjustment of the implantable device to test the function of the device and select optimal permanent programmed values with analysis, review and report by a physician or other qualified health care	93283	CPT4
Electrophysiologic follow-up study with pacing and recording to test effectiveness of therapy, including induction or attempted induction of arrhythmia	93624	CPT4
Comprehensive electrophysiologic evaluation with insertion and repositioning of multiple electrode catheters, induction or attempted induction of an arrhythmia with right atrial pacing and recording and catheter ablation of arrhythmogenic focus, including	93654	CPT4
Intracardiac catheter ablation of arrhythmogenic focus; for treatment of ventricular tachycardia	93652	CPT4
Interrogation device evaluation (in person) with analysis, review and report by a physician or other qualified health care professional, includes connection, recording and disconnection per patient encounter; single, dual, or multiple lead transvenous imp	93289	CPT4
Interrogation device evaluation (in person) with analysis, review and report by a physician or other qualified health care professional, includes connection, recording and disconnection per patient encounter; implantable cardiovascular physiologic monitor	93290	CPT4
Induction of arrhythmia by electrical pacing	93618	CPT4
Peri-procedural device evaluation (in person) and programming of device system parameters before or after a surgery, procedure, or test with analysis, review and report by a physician or other qualified health care professional; single, dual, or multiple	93287	CPT4
Intracardiac catheter ablation of atrioventricular node function, atrioventricular conduction for creation of complete heart block, with or without temporary pacemaker placement	93650	CPT4
Programming device evaluation (in person) with iterative adjustment of the implantable device to test the function of the device and select optimal permanent programmed values with analysis, review and report by a physician or other qualified health care	93280	CPT4
Evaluation of cardiovascular function with tilt table evaluation, with continuous ECG monitoring and intermittent blood pressure monitoring, with or without pharmacological intervention	93660	CPT4
Programming device evaluation (in person) with iterative adjustment of the implantable device to test the function of the device and select optimal permanent programmed values with analysis, review and report by a physician or other qualified health care	93282	CPT4
Programming device evaluation (in person) with iterative adjustment of the implantable device to test the function of the device and select optimal permanent programmed values with analysis, review and report by a physician or other qualified health care	93281	CPT4
Peri-procedural device evaluation (in person) and programming of device system parameters before or after a surgery, procedure, or test with analysis, review and report by a physician or other qualified health care professional; single, dual, or multiple	93286	CPT4
Additional linear or focal intracardiac catheter ablation of the left or right atrium for treatment of atrial fibrillation remaining after completion of pulmonary vein isolation (List separately in addition to code for primary procedure)	93657	CPT4
Comprehensive electrophysiologic evaluation including insertion and repositioning of multiple electrode catheters with induction or attempted induction of arrhythmia; with left ventricular pacing and recording (List separately in addition to code for prim	93622	CPT4
Programmed stimulation and pacing after intravenous drug infusion (List separately in addition to code for primary procedure)	93623	CPT4
Interrogation device evaluation (in person) with analysis, review and report by a physician or other qualified health care professional, includes connection, recording and disconnection per patient encounter; subcutaneous cardiac rhythm monitor system, in	93291	CPT4
Interrogation device evaluation (in person) with analysis, review and report by a physician or other qualified health care professional, includes connection, recording and disconnection per patient encounter; wearable defibrillator system	93292	CPT4
Interrogation device evaluation (in person) with analysis, review and report by a physician or other qualified health care professional, includes connection, recording and disconnection per patient encounter; single, dual, or multiple lead pacemaker syste	93288	CPT4
Intracardiac echocardiography during therapeutic/diagnostic intervention, including imaging supervision and interpretation (List separately in addition to code for primary procedure)	93662	CPT4
Programming device evaluation (in person) with iterative adjustment of the implantable device to test the function of the device and select optimal permanent programmed values with analysis, review and report by a physician or other qualified health care	93284	CPT4
Comprehensive electrophysiologic evaluation including insertion and repositioning of multiple electrode catheters with induction or attempted induction of arrhythmia; with left atrial pacing and recording from coronary sinus or left atrium (List separatel	93621	CPT4
