# Supplementary material
Source: Research Square preprint supplement (doi:10.21203/rs.3.rs-9581360/v1)
Supplement: Supplementary file 6 [file e6d5cbbc785a7ae42000098b.xlsx]

## Sheet: All_P_LP
Supplemental Table S3: Curated pathogenic and likely pathogenic variants in cardiomyopathy-associated genes
CHR	POS	REF	ALT	CHR-POS-REF-ALT	CAVA_GENE	MANE_SELECT_TRANSCRIPT	CAVA_CSN	CAVA_IMPACT	CAVA_CLASS	CAVA_SO	CAVA_LOCATION	CAVA/HGVSg	CAVA/HGVSc	CAVA/HGVSp	SAVI_CLASSIFICATION	SAVI_RPCLASS_DESCRIPTION	FINAL_CLASSIFICATION
15	34793398	C	T	15-34793398-C-T	ACTC1	NM_005159.5	c.301G>A_p.Glu101Lys	2	NSY	missense_variant	Ex3	NC_000015.10:g.34793398C>T	NC_000015.10(NM_005159.5):c.301G>A	NP_005150.1:p.(Glu101Lys)	LIKELY_PATHOGENIC	PM2_supporting,PP3_moderate,PP5,PS3_supporting(BP->PP),PS4	P
10	119651741	GC	G	10-119651741-GC-G	BAG3	NM_004281.4	c.72del_p.Gly25AspfsTer186	1	FS	frameshift_variant	Ex1	NC_000010.11:g.119651742del	NC_000010.11(NM_004281.4):c.72del	NP_004272.2:p.(Gly25AspfsTer186)	PATHOGENIC	PVS1,PM2_supporting,PP5,PS4_supporting	LP
10	119672329	CAG	C	10-119672329-CAG-C	BAG3	NM_004281.4	c.583_584del_p.Ser195ProfsTer59	1	FS	frameshift_variant	Ex3	NC_000010.11:g.119672330_119672331del	NC_000010.11(NM_004281.4):c.583_584del	NP_004272.2:p.(Ser195ProfsTer59)	LIKELY_PATHOGENIC	PVS1,PM2_supporting
10	119672333	CTGGG	C	10-119672333-CTGGG-C	BAG3	NM_004281.4	c.587_590del_p.Leu196ProfsTer14	1	FS	frameshift_variant	Ex3	NC_000010.11:g.119672334_119672337del	NC_000010.11(NM_004281.4):c.587_590del	NP_004272.2:p.(Leu196ProfsTer14)	LIKELY_PATHOGENIC	PVS1,PM2_supporting
10	119672339	AGTCAC	A	10-119672339-AGTCAC-A	BAG3	NM_004281.4	c.593_597del_p.Ser198ThrfsTer55	1	FS	frameshift_variant	Ex3	NC_000010.11:g.119672340_119672344del	NC_000010.11(NM_004281.4):c.593_597del	NP_004272.2:p.(Ser198ThrfsTer55)	LIKELY_PATHOGENIC	PVS1,PM2_supporting
10	119670178	G	A	10-119670178-G-A	BAG3	NM_004281.4	c.507+1G>A_p.?	1	ESS	splice_donor_variant	In2/3	NC_000010.11:g.119670178G>A	NC_000010.11(NM_004281.4):c.507+1G>A	NP_004272.2:p.(?)	LIKELY_PATHOGENIC	PVS1,PM2_supporting
10	119651821	G	A	10-119651821-G-A	BAG3	NM_004281.4	c.146G>A_p.Trp49Ter	1	SG	stop_gained	Ex1	NC_000010.11:g.119651821G>A	NC_000010.11(NM_004281.4):c.146G>A	NP_004272.2:p.(Trp49Ter)	PATHOGENIC	PVS1,PM2_supporting,PP5,PS4_supporting	LP
10	119676971	C	T	10-119676971-C-T	BAG3	NM_004281.4	c.1417C>T_p.Arg473Ter	1	SG	stop_gained	Ex4	NC_000010.11:g.119676971C>T	NC_000010.11(NM_004281.4):c.1417C>T	NP_004272.2:p.(Arg473Ter)	LIKELY_PATHOGENIC	PVS1_strong,PM2_supporting,PP5,PS4_moderate
2	219421364	C	T	2-219421364-C-T	DES	NM_001927.4	c.1048C>T_p.Arg350Trp	2	NSY	missense_variant	Ex6	NC_000002.12:g.219421364C>T	NC_000002.12(NM_001927.4):c.1048C>T	NP_001918.3:p.(Arg350Trp)	PATHOGENIC	PM2_supporting,PM5,PP3_moderate,PS3(NA->PS),PS4_moderate	LP
18	31082378	G	A	18-31082378-G-A	DSC2	NM_024422.6	c.1123C>T_p.Arg375Ter	1	SG	stop_gained	Ex9	NC_000018.10:g.31082378G>A	NC_000018.10(NM_024422.6):c.1123C>T	NP_077740.1:p.(Arg375Ter)	PATHOGENIC	PVS1,PM2,PP3_moderate,PS4	LP
18	31521245	T	C	18-31521245-T-C	DSG2	NM_001943.5	c.523+2T>C_p.?	1	ESS	splice_donor_variant	In5/6	NC_000018.10:g.31521245T>C	NC_000018.10(NM_001943.5):c.523+2T>C	NP_001934.2:p.(?)	PATHOGENIC	PVS1,PM2_supporting,PS4	LP
18	31521244	G	A	18-31521244-G-A	DSG2	NM_001943.5	c.523+1G>A_p.?	1	ESS	splice_donor_variant	In5/6	NC_000018.10:g.31521244G>A	NC_000018.10(NM_001943.5):c.523+1G>A	NP_001934.2:p.(?)	PATHOGENIC	PVS1,PM2,PS4_supporting(BP->PM)	LP
18	31521244	G	C	18-31521244-G-C	DSG2	NM_001943.5	c.523+1G>C_p.?	1	ESS	splice_donor_variant	In5/6	NC_000018.10:g.31521244G>C	NC_000018.10(NM_001943.5):c.523+1G>C	NP_001934.2:p.(?)	PATHOGENIC	PVS1,PM2_supporting,PS4_supporting	LP
18	31519858	G	A	18-31519858-G-A	DSG2	NM_001943.5	c.137G>A_p.Arg46Gln	2	NSY	missense_variant	Ex3	NC_000018.10:g.31519858G>A	NC_000018.10(NM_001943.5):c.137G>A	NP_001934.2:p.(Arg46Gln)	LIKELY_PATHOGENIC	PM2_supporting,PM5,PP5,PS3_supporting(PP->PM),PS4	LP
18	31519857	C	T	18-31519857-C-T	DSG2	NM_001943.5	c.136C>T_p.Arg46Trp	2	NSY	missense_variant	Ex3	NC_000018.10:g.31519857C>T	NC_000018.10(NM_001943.5):c.136C>T	NP_001934.2:p.(Arg46Trp)	LIKELY_PATHOGENIC	PM2_supporting,PM5,PP5,PS3_supporting(PP->PM),PS4_moderate
18	31519867	G	A	18-31519867-G-A	DSG2	NM_001943.5	c.146G>A_p.Arg49His	2	NSY	missense_variant	Ex3	NC_000018.10:g.31519867G>A	NC_000018.10(NM_001943.5):c.146G>A	NP_001934.2:p.(Arg49His)	LIKELY_PATHOGENIC	PM2_supporting,PP3,PP5,PS3_supporting(PP->PM),PS4
6	7567425	GA	G	6-7567425-GA-G	DSP	NM_004415.4	c.1119del_p.Glu374LysfsTer19	1	FS	frameshift_variant	Ex9	NC_000006.12:g.7567426del	NC_000006.12(NM_004415.4):c.1119del	NP_004406.2:p.(Glu374LysfsTer19)	LIKELY_PATHOGENIC	PVS1,PM2_supporting,PP5
6	7567780	GT	G	6-7567780-GT-G	DSP	NM_004415.4	c.1146del_p.Phe382LeufsTer11	1	FS	frameshift_variant	Ex10	NC_000006.12:g.7567781del	NC_000006.12(NM_004415.4):c.1146del	NP_004406.2:p.(Phe382LeufsTer11)	PATHOGENIC	PVS1,PM2_supporting,PP3,PP5,PS4_supporting
6	7571912	CAG	C	6-7571912-CAG-C	DSP	NM_004415.4	c.1978_1979del_p.Glu660LysfsTer2	1	FS	frameshift_variant	Ex15	NC_000006.12:g.7571913_7571914del	NC_000006.12(NM_004415.4):c.1978_1979del	NP_004406.2:p.(Glu660LysfsTer2)	LIKELY_PATHOGENIC	PVS1,PM2_supporting,PP5
6	7574083	CAG	C	6-7574083-CAG-C	DSP	NM_004415.4	c.2131_2132del_p.Ser711CysfsTer4	1	FS	splice_region_variant|frameshift_variant	Ex16	NC_000006.12:g.7574084_7574085del	NC_000006.12(NM_004415.4):c.2131_2132del	NP_004406.2:p.(Ser711CysfsTer4)	PATHOGENIC	PVS1,PM2_supporting,PP3,PP5,PS4_moderate
6	7578488	AT	A	6-7578488-AT-A	DSP	NM_004415.4	c.3012del_p.Ile1004MetfsTer14	1	FS	frameshift_variant	Ex22	NC_000006.12:g.7578489del	NC_000006.12(NM_004415.4):c.3012del	NP_004406.2:p.(Ile1004MetfsTer14)	LIKELY_PATHOGENIC	PVS1,PM2_supporting,PP5
6	7579922	G	GGAAAATC	6-7579922-G-GGAAAATC	DSP	NM_004415.4	c.3735_3741dup_p.Asp1248LysfsTer7	1	FS	frameshift_variant	Ex23	NC_000006.12:g.7579922_7579923insGAAAATC	NC_000006.12(NM_004415.4):c.3735_3741dup	NP_004406.2:p.(Asp1248LysfsTer7)	PATHOGENIC	PVS1_strong,PM2_supporting,PP5,PS4
6	7580494	CCACTG	C	6-7580494-CCACTG-C	DSP	NM_004415.4	c.4305_4309del_p.Thr1436LeufsTer2	1	FS	frameshift_variant	Ex23	NC_000006.12:g.7580495_7580499del	NC_000006.12(NM_004415.4):c.4305_4309del	NP_004406.2:p.(Thr1436LeufsTer2)	LIKELY_PATHOGENIC	PVS1_strong,PM2_supporting,PP5,PS4_supporting
6	7541965	TG	T	6-7541965-TG-T	DSP	NM_004415.4	c.51del_p.Met17IlefsTer14	1	FS	frameshift_variant	Ex1	NC_000006.12:g.7541966del	NC_000006.12(NM_004415.4):c.51del	NP_004406.2:p.(Met17IlefsTer14)	LIKELY_PATHOGENIC	PVS1,PM2_supporting,PP5
6	7559326	CAG	C	6-7559326-CAG-C	DSP	NM_004415.4	c.526_527del_p.Ser176TrpfsTer6	1	FS	frameshift_variant	Ex4	NC_000006.12:g.7559327_7559328del	NC_000006.12(NM_004415.4):c.526_527del	NP_004406.2:p.(Ser176TrpfsTer6)	LIKELY_PATHOGENIC	PVS1,PM2_supporting,PP5
6	7581510	CAGAG	C	6-7581510-CAGAG-C	DSP	NM_004415.4	c.5327_5330del_p.Glu1776GlyfsTer4	1	FS	frameshift_variant	Ex23	NC_000006.12:g.7581511_7581514del	NC_000006.12(NM_004415.4):c.5327_5330del	NP_004406.2:p.(Glu1776GlyfsTer4)	LIKELY_PATHOGENIC	PVS1_strong,PM2_supporting,PP5,PS4_supporting
6	7582689	AC	A	6-7582689-AC-A	DSP	NM_004415.4	c.5428del_p.Gln1810ArgfsTer8	1	FS	frameshift_variant	Ex24	NC_000006.12:g.7582690del	NC_000006.12(NM_004415.4):c.5428del	NP_004406.2:p.(Gln1810ArgfsTer8)	LIKELY_PATHOGENIC	PVS1_strong,PM2_supporting,PP5,PS4_supporting
6	7583087	TCAGA	T	6-7583087-TCAGA-T	DSP	NM_004415.4	c.5829_5832del_p.Arg1943SerfsTer28	1	FS	frameshift_variant	Ex24	NC_000006.12:g.7583088_7583091del	NC_000006.12(NM_004415.4):c.5829_5832del	NP_004406.2:p.(Arg1943SerfsTer28)	LIKELY_PATHOGENIC	PVS1_strong,PM2_supporting,PP5,PS4_supporting
6	7583351	CTT	C	6-7583351-CTT-C	DSP	NM_004415.4	c.6091_6092del_p.Leu2031GlyfsTer29	1	FS	frameshift_variant	Ex24	NC_000006.12:g.7583352_7583353del	NC_000006.12(NM_004415.4):c.6091_6092del	NP_004406.2:p.(Leu2031GlyfsTer29)	LIKELY_PATHOGENIC	PVS1_strong,PM2_supporting,PP5,PS4_supporting
6	7583530	GA	G	6-7583530-GA-G	DSP	NM_004415.4	c.6273del_p.Ala2092LeufsTer24	1	FS	frameshift_variant	Ex24	NC_000006.12:g.7583531del	NC_000006.12(NM_004415.4):c.6273del	NP_004406.2:p.(Ala2092LeufsTer24)	LIKELY_PATHOGENIC	PVS1_strong,PM2_supporting,PP5,PS4_supporting
6	7583763	TAGTC	T	6-7583763-TAGTC-T	DSP	NM_004415.4	c.6504_6507del_p.Ser2168ArgfsTer18	1	FS	frameshift_variant	Ex24	NC_000006.12:g.7583764_7583767del	NC_000006.12(NM_004415.4):c.6504_6507del	NP_004406.2:p.(Ser2168ArgfsTer18)	LIKELY_PATHOGENIC	PVS1_strong,PM2_supporting,PP5,PS4_supporting
6	7584211	AAG	A	6-7584211-AAG-A	DSP	NM_004415.4	c.6954_6955del_p.Gly2319SerfsTer5	1	FS	frameshift_variant	Ex24	NC_000006.12:g.7584212_7584213del	NC_000006.12(NM_004415.4):c.6954_6955del	NP_004406.2:p.(Gly2319SerfsTer5)	LIKELY_PATHOGENIC	PVS1_strong,PM2_supporting,PP5,PS4_supporting
6	7584504	AT	A	6-7584504-AT-A	DSP	NM_004415.4	c.7248del_p.Phe2416LeufsTer14	1	FS	frameshift_variant	Ex24	NC_000006.12:g.7584505del	NC_000006.12(NM_004415.4):c.7248del	NP_004406.2:p.(Phe2416LeufsTer14)	LIKELY_PATHOGENIC	PVS1_strong,PM2_supporting,PP5,PS4_supporting
6	7584721	CTAAT	C	6-7584721-CTAAT-C	DSP	NM_004415.4	c.7461_7464del_p.Asp2489MetfsTer17	1	FS	frameshift_variant	Ex24	NC_000006.12:g.7584722_7584725del	NC_000006.12(NM_004415.4):c.7461_7464del	NP_004406.2:p.(Asp2489MetfsTer17)	LIKELY_PATHOGENIC	PVS1_strong,PM2_supporting,PS4_supporting
6	7585028	CAGTA	C	6-7585028-CAGTA-C	DSP	NM_004415.4	c.7773_7776del_p.Ser2591ArgfsTer11	1	FS	frameshift_variant	Ex24	NC_000006.12:g.7585029_7585032del	NC_000006.12(NM_004415.4):c.7773_7776del	NP_004406.2:p.(Ser2591ArgfsTer11)	LIKELY_PATHOGENIC	PVS1_strong,PM2_supporting,PP5,PS4_supporting
6	7541921	CT	C	6-7541921-CT-C	DSP	NM_004415.4	c.7del_p.Cys3AlafsTer15	1	FS	frameshift_variant	Ex1	NC_000006.12:g.7541922del	NC_000006.12(NM_004415.4):c.7del	NP_004406.2:p.(Cys3AlafsTer15)	LIKELY_PATHOGENIC	PVS1,PM2_supporting
6	7585550	G	GGCTT	6-7585550-G-GGCTT	DSP	NM_004415.4	c.8291_8292insTGCT_p.Gln2765AlafsTer23	1	FS	frameshift_variant	Ex24	NC_000006.12:g.7585550_7585551insGCTT	NC_000006.12(NM_004415.4):c.8291_8292insTGCT	NP_004406.2:p.(Gln2765AlafsTer23)	LIKELY_PATHOGENIC	PVS1_strong,PM2_supporting,PS4_supporting
6	7574080	TGACA	T	6-7574080-TGACA-T	DSP	NM_004415.4	c.2131-3_2131del_p.?	1	ESS	splice_donor_variant	In15/16-Ex16	NC_000006.12:g.7574081_7574084del	NC_000006.12(NM_004415.4):c.2131-3_2131del	NP_004406.2:p.(?)	LIKELY_PATHOGENIC	PVS1,PM2_supporting,PP5,PS4_NA(BP->PP)	LP
6	7567447	C	T	6-7567447-C-T	DSP	NM_004415.4	c.1138C>T_p.Gln380Ter	1	SG	splice_region_variant|stop_gained	Ex9	NC_000006.12:g.7567447C>T	NC_000006.12(NM_004415.4):c.1138C>T	NP_004406.2:p.(Gln380Ter)	PATHOGENIC	PVS1,PM2_supporting,PP3,PP5,PS4_supporting
6	7575294	G	C	6-7575294-G-C	DSP	NM_004415.4	c.2437-1G>C_p.?	1	ESS	splice_acceptor_variant	In17/18	NC_000006.12:g.7575294G>C	NC_000006.12(NM_004415.4):c.2437-1G>C	NP_004406.2:p.(?)	PATHOGENIC	PVS1,PM2_supporting,PP5,PS4_supporting
6	7555797	C	T	6-7555797-C-T	DSP	NM_004415.4	c.250C>T_p.Arg84Ter	1	SG	stop_gained	Ex2	NC_000006.12:g.7555797C>T	NC_000006.12(NM_004415.4):c.250C>T	NP_004406.2:p.(Arg84Ter)	PATHOGENIC	PVS1,PM2_supporting,PP3,PP5,PS4_supporting
6	7565521	G	A	6-7565521-G-A	DSP	NM_004415.4	c.939+1G>A_p.?	1	ESS	splice_donor_variant	In7/8	NC_000006.12:g.7565521G>A	NC_000006.12(NM_004415.4):c.939+1G>A	NP_004406.2:p.(?)	PATHOGENIC	PVS1,PM2_supporting,PP5,PS4	P
6	7555815	C	T	6-7555815-C-T	DSP	NM_004415.4	c.268C>T_p.Gln90Ter	1	SG	stop_gained	Ex2	NC_000006.12:g.7555815C>T	NC_000006.12(NM_004415.4):c.268C>T	NP_004406.2:p.(Gln90Ter)	PATHOGENIC	PVS1,PM2_supporting,PP5,PS4_moderate
6	7568443	C	T	6-7568443-C-T	DSP	NM_004415.4	c.1273C>T_p.Arg425Ter	1	SG	stop_gained	Ex11	NC_000006.12:g.7568443C>T	NC_000006.12(NM_004415.4):c.1273C>T	NP_004406.2:p.(Arg425Ter)	PATHOGENIC	PVS1,PM2_supporting,PP5,PS4_moderate
6	7583758	C	T	6-7583758-C-T	DSP	NM_004415.4	c.6496C>T_p.Arg2166Ter	1	SG	stop_gained	Ex24	NC_000006.12:g.7583758C>T	NC_000006.12(NM_004415.4):c.6496C>T	NP_004406.2:p.(Arg2166Ter)	PATHOGENIC	PVS1_strong,PM2_supporting,PP5,PS4	LP
6	7583740	C	T	6-7583740-C-T	DSP	NM_004415.4	c.6478C>T_p.Arg2160Ter	1	SG	stop_gained	Ex24	NC_000006.12:g.7583740C>T	NC_000006.12(NM_004415.4):c.6478C>T	NP_004406.2:p.(Arg2160Ter)	PATHOGENIC	PVS1_strong,PM2_supporting,PP5,PS4
6	7580562	C	T	6-7580562-C-T	DSP	NM_004415.4	c.4372C>T_p.Arg1458Ter	1	SG	stop_gained	Ex23	NC_000006.12:g.7580562C>T	NC_000006.12(NM_004415.4):c.4372C>T	NP_004406.2:p.(Arg1458Ter)	LIKELY_PATHOGENIC	PVS1_strong,PM2_supporting,PP5,PS4_moderate
6	7581402	C	T	6-7581402-C-T	DSP	NM_004415.4	c.5212C>T_p.Arg1738Ter	1	SG	stop_gained	Ex23	NC_000006.12:g.7581402C>T	NC_000006.12(NM_004415.4):c.5212C>T	NP_004406.2:p.(Arg1738Ter)	LIKELY_PATHOGENIC	PVS1_strong,PM2_supporting,PP5,PS4_moderate
6	7580388	C	T	6-7580388-C-T	DSP	NM_004415.4	c.4198C>T_p.Arg1400Ter	1	SG	stop_gained	Ex23	NC_000006.12:g.7580388C>T	NC_000006.12(NM_004415.4):c.4198C>T	NP_004406.2:p.(Arg1400Ter)	LIKELY_PATHOGENIC	PVS1_strong,PM2_supporting,PP5,PS4_moderate
6	7579995	C	T	6-7579995-C-T	DSP	NM_004415.4	c.3805C>T_p.Arg1269Ter	1	SG	stop_gained	Ex23	NC_000006.12:g.7579995C>T	NC_000006.12(NM_004415.4):c.3805C>T	NP_004406.2:p.(Arg1269Ter)	LIKELY_PATHOGENIC	PVS1_strong,PM2_supporting,PP5,PS4_moderate
6	7580721	C	T	6-7580721-C-T	DSP	NM_004415.4	c.4531C>T_p.Gln1511Ter	1	SG	stop_gained	Ex23	NC_000006.12:g.7580721C>T	NC_000006.12(NM_004415.4):c.4531C>T	NP_004406.2:p.(Gln1511Ter)	LIKELY_PATHOGENIC	PVS1_strong,PM2_supporting,PP5,PS4_moderate(BP->PS)
6	7580055	C	T	6-7580055-C-T	DSP	NM_004415.4	c.3865C>T_p.Gln1289Ter	1	SG	stop_gained	Ex23	NC_000006.12:g.7580055C>T	NC_000006.12(NM_004415.4):c.3865C>T	NP_004406.2:p.(Gln1289Ter)	LIKELY_PATHOGENIC	PVS1_strong,PM2_supporting,PP5,PS4_supporting
6	7559281	C	T	6-7559281-C-T	DSP	NM_004415.4	c.478C>T_p.Arg160Ter	1	SG	stop_gained	Ex4	NC_000006.12:g.7559281C>T	NC_000006.12(NM_004415.4):c.478C>T	NP_004406.2:p.(Arg160Ter)	PATHOGENIC	PVS1,PM2_supporting,PP5,PS4
6	7572069	G	A	6-7572069-G-A	DSP	NM_004415.4	c.2130+1G>A_p.?	1	ESS	splice_donor_variant	In15/16	NC_000006.12:g.7572069G>A	NC_000006.12(NM_004415.4):c.2130+1G>A	NP_004406.2:p.(?)	PATHOGENIC	PVS1,PM2_supporting,PP5,PS4_supporting
6	7566428	C	T	6-7566428-C-T	DSP	NM_004415.4	c.991C>T_p.Gln331Ter	1	SG	stop_gained	Ex8	NC_000006.12:g.7566428C>T	NC_000006.12(NM_004415.4):c.991C>T	NP_004406.2:p.(Gln331Ter)	PATHOGENIC	PVS1,PM2_supporting,PP5,PS4_supporting
6	7570444	C	T	6-7570444-C-T	DSP	NM_004415.4	c.1582C>T_p.Gln528Ter	1	SG	stop_gained	Ex13	NC_000006.12:g.7570444C>T	NC_000006.12(NM_004415.4):c.1582C>T	NP_004406.2:p.(Gln528Ter)	PATHOGENIC	PVS1,PM2_supporting,PP5,PS4_supporting
6	7579989	C	T	6-7579989-C-T	DSP	NM_004415.4	c.3799C>T_p.Arg1267Ter	1	SG	stop_gained	Ex23	NC_000006.12:g.7579989C>T	NC_000006.12(NM_004415.4):c.3799C>T	NP_004406.2:p.(Arg1267Ter)	PATHOGENIC	PVS1_strong,PM2_supporting,PP5,PS4	P
6	7579323	C	T	6-7579323-C-T	DSP	NM_004415.4	c.3133C>T_p.Arg1045Ter	1	SG	stop_gained	Ex23	NC_000006.12:g.7579323C>T	NC_000006.12(NM_004415.4):c.3133C>T	NP_004406.2:p.(Arg1045Ter)	PATHOGENIC	PVS1_strong,PM2_supporting,PP5,PS4
6	7583062	C	T	6-7583062-C-T	DSP	NM_004415.4	c.5800C>T_p.Arg1934Ter	1	SG	stop_gained	Ex24	NC_000006.12:g.7583062C>T	NC_000006.12(NM_004415.4):c.5800C>T	NP_004406.2:p.(Arg1934Ter)	PATHOGENIC	PVS1_strong,PM2_supporting,PP5,PS4
6	7583113	C	T	6-7583113-C-T	DSP	NM_004415.4	c.5851C>T_p.Arg1951Ter	1	SG	stop_gained	Ex24	NC_000006.12:g.7583113C>T	NC_000006.12(NM_004415.4):c.5851C>T	NP_004406.2:p.(Arg1951Ter)	LIKELY_PATHOGENIC	PVS1_strong,PM2_supporting,PP5,PS4_moderate
6	7580370	C	T	6-7580370-C-T	DSP	NM_004415.4	c.4180C>T_p.Gln1394Ter	1	SG	stop_gained	Ex23	NC_000006.12:g.7580370C>T	NC_000006.12(NM_004415.4):c.4180C>T	NP_004406.2:p.(Gln1394Ter)	LIKELY_PATHOGENIC	PVS1_strong,PM2_supporting,PP5,PS4_moderate
6	7584112	C	T	6-7584112-C-T	DSP	NM_004415.4	c.6850C>T_p.Arg2284Ter	1	SG	stop_gained	Ex24	NC_000006.12:g.7584112C>T	NC_000006.12(NM_004415.4):c.6850C>T	NP_004406.2:p.(Arg2284Ter)	LIKELY_PATHOGENIC	PVS1_strong,PM2_supporting,PP5,PS4_moderate
6	7579820	T	A	6-7579820-T-A	DSP	NM_004415.4	c.3630T>A_p.Tyr1210Ter	1	SG	stop_gained	Ex23	NC_000006.12:g.7579820T>A	NC_000006.12(NM_004415.4):c.3630T>A	NP_004406.2:p.(Tyr1210Ter)	LIKELY_PATHOGENIC	PVS1_strong,PM2_supporting,PP5,PS4_supporting
6	7584479	C	G	6-7584479-C-G	DSP	NM_004415.4	c.7217C>G_p.Ser2406Ter	1	SG	stop_gained	Ex24	NC_000006.12:g.7584479C>G	NC_000006.12(NM_004415.4):c.7217C>G	NP_004406.2:p.(Ser2406Ter)	LIKELY_PATHOGENIC	PVS1_strong,PM2_supporting,PP5,PS4_supporting
6	7581189	C	T	6-7581189-C-T	DSP	NM_004415.4	c.4999C>T_p.Gln1667Ter	1	SG	stop_gained	Ex23	NC_000006.12:g.7581189C>T	NC_000006.12(NM_004415.4):c.4999C>T	NP_004406.2:p.(Gln1667Ter)	LIKELY_PATHOGENIC	PVS1_strong,PM2_supporting,PP5,PS4_supporting
6	7584903	C	G	6-7584903-C-G	DSP	NM_004415.4	c.7641C>G_p.Tyr2547Ter	1	SG	stop_gained	Ex24	NC_000006.12:g.7584903C>G	NC_000006.12(NM_004415.4):c.7641C>G	NP_004406.2:p.(Tyr2547Ter)	LIKELY_PATHOGENIC	PVS1_strong,PM2_supporting,PP5,PS4_supporting
6	7579983	G	T	6-7579983-G-T	DSP	NM_004415.4	c.3793G>T_p.Glu1265Ter	1	SG	stop_gained	Ex23	NC_000006.12:g.7579983G>T	NC_000006.12(NM_004415.4):c.3793G>T	NP_004406.2:p.(Glu1265Ter)	LIKELY_PATHOGENIC	PVS1_strong,PM2_supporting,PP5,PS4_supporting
6	7574797	T	C	6-7574797-T-C	DSP	NM_004415.4	c.2436+2T>C_p.?	1	ESS	splice_donor_variant	In17/18	NC_000006.12:g.7574797T>C	NC_000006.12(NM_004415.4):c.2436+2T>C	NP_004406.2:p.(?)	PATHOGENIC	PVS1,PM2_supporting,PS4_moderate	LP
6	7555821	G	T	6-7555821-G-T	DSP	NM_004415.4	c.273+1G>T_p.?	1	ESS	splice_donor_variant	In2/3	NC_000006.12:g.7555821G>T	NC_000006.12(NM_004415.4):c.273+1G>T	NP_004406.2:p.(?)	LIKELY_PATHOGENIC	PVS1,PM2_supporting	LP
6	7570434	TA	T	6-7570434-TA-T	DSP	NM_004415.4	c.1575-2del_p.?	1	ESS	splice_acceptor_variant	In12/13	NC_000006.12:g.7570435del	NC_000006.12(NM_004415.4):c.1575-2del	NP_004406.2:p.(?)	LIKELY_PATHOGENIC	PVS1,PM2_supporting
6	7576456	GGTAT	G	6-7576456-GGTAT-G	DSP	NM_004415.4	c.2793+1_2793+4del_p.?	1	ESS	splice_donor_variant	In19/20	NC_000006.12:g.7576457_7576460del	NC_000006.12(NM_004415.4):c.2793+1_2793+4del	NP_004406.2:p.(?)	LIKELY_PATHOGENIC	PVS1,PM2_supporting
6	7558114	A	G	6-7558114-A-G	DSP	NM_004415.4	c.274-2A>G_p.?	1	ESS	splice_acceptor_variant	In2/3	NC_000006.12:g.7558114A>G	NC_000006.12(NM_004415.4):c.274-2A>G	NP_004406.2:p.(?)	LIKELY_PATHOGENIC	PVS1,PM2_supporting
6	7577886	GGTAT	G	6-7577886-GGTAT-G	DSP	NM_004415.4	c.2985+1_2985+4del_p.?	1	ESS	splice_donor_variant	In21/22	NC_000006.12:g.7577887_7577890del	NC_000006.12(NM_004415.4):c.2985+1_2985+4del	NP_004406.2:p.(?)	LIKELY_PATHOGENIC	PVS1,PM2_supporting
6	7581570	G	T	6-7581570-G-T	DSP	NM_004415.4	c.5379+1G>T_p.?	1	ESS	splice_donor_variant	In23/24	NC_000006.12:g.7581570G>T	NC_000006.12(NM_004415.4):c.5379+1G>T	NP_004406.2:p.(?)	LIKELY_PATHOGENIC	PVS1,PM2_supporting
6	7571970	C	T	6-7571970-C-T	DSP	NM_004415.4	c.2032C>T_p.Gln678Ter	1	SG	stop_gained	Ex15	NC_000006.12:g.7571970C>T	NC_000006.12(NM_004415.4):c.2032C>T	NP_004406.2:p.(Gln678Ter)	PATHOGENIC	PVS1,PM2_supporting,PP3
6	7565398	C	T	6-7565398-C-T	DSP	NM_004415.4	c.817C>T_p.Gln273Ter	1	SG	stop_gained	Ex7	NC_000006.12:g.7565398C>T	NC_000006.12(NM_004415.4):c.817C>T	NP_004406.2:p.(Gln273Ter)	PATHOGENIC	PVS1,PM2_supporting,PS4_supporting
6	7542041	T	G	6-7542041-T-G	DSP	NM_004415.4	c.126T>G_p.Tyr42Ter	1	SG	stop_gained	Ex1	NC_000006.12:g.7542041T>G	NC_000006.12(NM_004415.4):c.126T>G	NP_004406.2:p.(Tyr42Ter)	PATHOGENIC	PVS1,PM2_supporting,PS4_supporting
6	7581354	G	T	6-7581354-G-T	DSP	NM_004415.4	c.5164G>T_p.Glu1722Ter	1	SG	stop_gained	Ex23	NC_000006.12:g.7581354G>T	NC_000006.12(NM_004415.4):c.5164G>T	NP_004406.2:p.(Glu1722Ter)	LIKELY_PATHOGENIC	PVS1_strong,PM2_supporting,PS4_supporting
6	7585261	C	T	6-7585261-C-T	DSP	NM_004415.4	c.7999C>T_p.Gln2667Ter	1	SG	stop_gained	Ex24	NC_000006.12:g.7585261C>T	NC_000006.12(NM_004415.4):c.7999C>T	NP_004406.2:p.(Gln2667Ter)	LIKELY_PATHOGENIC	PVS1_strong,PM2_supporting,PS4_supporting
6	7565436	G	A	6-7565436-G-A	DSP	NM_004415.4	c.855G>A_p.Trp285Ter	1	SG	stop_gained	Ex7	NC_000006.12:g.7565436G>A	NC_000006.12(NM_004415.4):c.855G>A	NP_004406.2:p.(Trp285Ter)	LIKELY_PATHOGENIC	PVS1,PM2_supporting,PP5
6	7567396	C	T	6-7567396-C-T	DSP	NM_004415.4	c.1087C>T_p.Gln363Ter	1	SG	stop_gained	Ex9	NC_000006.12:g.7567396C>T	NC_000006.12(NM_004415.4):c.1087C>T	NP_004406.2:p.(Gln363Ter)	LIKELY_PATHOGENIC	PVS1,PM2_supporting,PP5
6	7576307	G	T	6-7576307-G-T	DSP	NM_004415.4	c.2644G>T_p.Glu882Ter	1	SG	stop_gained	Ex19	NC_000006.12:g.7576307G>T	NC_000006.12(NM_004415.4):c.2644G>T	NP_004406.2:p.(Glu882Ter)	LIKELY_PATHOGENIC	PVS1,PM2_supporting,PP5
6	7555749	C	T	6-7555749-C-T	DSP	NM_004415.4	c.202C>T_p.Gln68Ter	1	SG	stop_gained	Ex2	NC_000006.12:g.7555749C>T	NC_000006.12(NM_004415.4):c.202C>T	NP_004406.2:p.(Gln68Ter)	LIKELY_PATHOGENIC	PVS1,PM2_supporting,PP5
7	128845989	G	C	7-128845989-G-C	FLNC	NM_001458.5	c.3791-1G>C_p.?	1	ESS	splice_acceptor_variant	In21/22	NC_000007.14:g.128845989G>C	NC_000007.14(NM_001458.5):c.3791-1G>C	NP_001449.3:p.(?)	PATHOGENIC	PVS1,PM2_supporting,PP5,PS3_supporting(PP->PM),PS4
7	128849329	A	T	7-128849329-A-T	FLNC	NM_001458.5	c.4952-2A>T_p.?	1	ESS	splice_acceptor_variant	In29/30	NC_000007.14:g.128849329A>T	NC_000007.14(NM_001458.5):c.4952-2A>T	NP_001449.3:p.(?)	LIKELY_PATHOGENIC	PVS1,PM2_supporting,PP5,PS4_NA(BP->PP)
7	128854661	C	T	7-128854661-C-T	FLNC	NM_001458.5	c.6976C>T_p.Arg2326Ter	1	SG	stop_gained	Ex41	NC_000007.14:g.128854661C>T	NC_000007.14(NM_001458.5):c.6976C>T	NP_001449.3:p.(Arg2326Ter)	PATHOGENIC	PVS1,PM2_supporting,PP5,PS4_moderate
7	128849579	G	T	7-128849579-G-T	FLNC	NM_001458.5	c.5199+1G>T_p.?	1	ESS	splice_donor_variant	In30/31	NC_000007.14:g.128849579G>T	NC_000007.14(NM_001458.5):c.5199+1G>T	NP_001449.3:p.(?)	PATHOGENIC	PVS1,PM2_supporting,PP5,PS4_supporting
7	128844656	A	G	7-128844656-A-G	FLNC	NM_001458.5	c.3193-2A>G_p.?	1	ESS	splice_acceptor_variant	In20/21	NC_000007.14:g.128844656A>G	NC_000007.14(NM_001458.5):c.3193-2A>G	NP_001449.3:p.(?)	LIKELY_PATHOGENIC	PVS1,PM2_supporting,PS4_NA(BP->PP)
7	128849205	G	A	7-128849205-G-A	FLNC	NM_001458.5	c.4951+1G>A_p.?	1	ESS	splice_donor_variant	In29/30	NC_000007.14:g.128849205G>A	NC_000007.14(NM_001458.5):c.4951+1G>A	NP_001449.3:p.(?)	LIKELY_PATHOGENIC	PVS1,PM2_supporting
7	128849974	A	G	7-128849974-A-G	FLNC	NM_001458.5	c.5200-2A>G_p.?	1	ESS	splice_acceptor_variant	In30/31	NC_000007.14:g.128849974A>G	NC_000007.14(NM_001458.5):c.5200-2A>G	NP_001449.3:p.(?)	LIKELY_PATHOGENIC	PVS1,PM2_supporting
7	128840604	G	T	7-128840604-G-T	FLNC	NM_001458.5	c.1606G>T_p.Glu536Ter	1	SG	stop_gained	Ex10	NC_000007.14:g.128840604G>T	NC_000007.14(NM_001458.5):c.1606G>T	NP_001449.3:p.(Glu536Ter)	LIKELY_PATHOGENIC	PVS1,PM2_supporting
7	128851287	T	A	7-128851287-T-A	FLNC	NM_001458.5	c.5595T>A_p.Tyr1865Ter	1	SG	stop_gained	Ex34	NC_000007.14:g.128851287T>A	NC_000007.14(NM_001458.5):c.5595T>A	NP_001449.3:p.(Tyr1865Ter)	LIKELY_PATHOGENIC	PVS1,PM2_supporting
7	128838430	G	T	7-128838430-G-T	FLNC	NM_001458.5	c.1210+1G>T_p.?	1	ESS	splice_donor_variant	In7/8	NC_000007.14:g.128838430G>T	NC_000007.14(NM_001458.5):c.1210+1G>T	NP_001449.3:p.(?)	LIKELY_PATHOGENIC	PVS1,PM2_supporting
7	128848861	C	G	7-128848861-C-G	FLNC	NM_001458.5	c.4806C>G_p.Tyr1602Ter	1	SG	stop_gained	Ex28	NC_000007.14:g.128848861C>G	NC_000007.14(NM_001458.5):c.4806C>G	NP_001449.3:p.(Tyr1602Ter)	LIKELY_PATHOGENIC	PVS1,PM2_supporting
7	128853839	T	C	7-128853839-T-C	FLNC	NM_001458.5	c.6484+2T>C_p.?	1	ESS	splice_donor_variant	In39/40	NC_000007.14:g.128853839T>C	NC_000007.14(NM_001458.5):c.6484+2T>C	NP_001449.3:p.(?)	LIKELY_PATHOGENIC	PVS1,PM2_supporting
7	128841452	A	G	7-128841452-A-G	FLNC	NM_001458.5	c.2008-2A>G_p.?	1	ESS	splice_acceptor_variant	In12/13	NC_000007.14:g.128841452A>G	NC_000007.14(NM_001458.5):c.2008-2A>G	NP_001449.3:p.(?)	LIKELY_PATHOGENIC	PVS1,PM2_supporting
7	128851452	CA	C	7-128851452-CA-C	FLNC	NM_001458.5	c.5669-2del_p.?	1	ESS	splice_acceptor_variant	In34/35	NC_000007.14:g.128851453del	NC_000007.14(NM_001458.5):c.5669-2del	NP_001449.3:p.(?)	LIKELY_PATHOGENIC	PVS1,PM2_supporting
7	128856508	GCCTTTGCAGGAGACGGGGCTCAAGGT	G	7-128856508-GCCTTTGCAGGAGACGGGGCTCAAGGT-G	FLNC	NM_001458.5	c.7252-9_7268del_p.?	1	ESS	splice_donor_variant	In43/44-Ex44	NC_000007.14:g.128856509_128856534del	NC_000007.14(NM_001458.5):c.7252-9_7268del	NP_001449.3:p.(?)	LIKELY_PATHOGENIC	PVS1,PM2_supporting
7	128856539	C	T	7-128856539-C-T	FLNC	NM_001458.5	c.7273C>T_p.Gln2425Ter	1	SG	stop_gained	Ex44	NC_000007.14:g.128856539C>T	NC_000007.14(NM_001458.5):c.7273C>T	NP_001449.3:p.(Gln2425Ter)	PATHOGENIC	PVS1,PM2_supporting,PP3
7	128850924	T	A	7-128850924-T-A	FLNC	NM_001458.5	c.5520T>A_p.Tyr1840Ter	1	SG	stop_gained	Ex33	NC_000007.14:g.128850924T>A	NC_000007.14(NM_001458.5):c.5520T>A	NP_001449.3:p.(Tyr1840Ter)	PATHOGENIC	PVS1,PM2_supporting,PP3,PP5,PS4_supporting
7	128851243	C	T	7-128851243-C-T	FLNC	NM_001458.5	c.5551C>T_p.Gln1851Ter	1	SG	stop_gained	Ex34	NC_000007.14:g.128851243C>T	NC_000007.14(NM_001458.5):c.5551C>T	NP_001449.3:p.(Gln1851Ter)	LIKELY_PATHOGENIC	PVS1,PM2_supporting,PP5
7	128840162	T	G	7-128840162-T-G	FLNC	NM_001458.5	c.1549+2T>G_p.?	1	ESS	splice_donor_variant	In9/10	NC_000007.14:g.128840162T>G	NC_000007.14(NM_001458.5):c.1549+2T>G	NP_001449.3:p.(?)	LIKELY_PATHOGENIC	PVS1,PM2_supporting,PP5
7	128854123	C	T	7-128854123-C-T	FLNC	NM_001458.5	c.6634C>T_p.Gln2212Ter	1	SG	stop_gained	Ex40	NC_000007.14:g.128854123C>T	NC_000007.14(NM_001458.5):c.6634C>T	NP_001449.3:p.(Gln2212Ter)	LIKELY_PATHOGENIC	PVS1,PM2_supporting,PP5
7	128856743	A	G	7-128856743-A-G	FLNC	NM_001458.5	c.7385-2A>G_p.?	1	ESS	splice_acceptor_variant	In44/45	NC_000007.14:g.128856743A>G	NC_000007.14(NM_001458.5):c.7385-2A>G	NP_001449.3:p.(?)	LIKELY_PATHOGENIC	PVS1,PM2_supporting,PP5
7	128850050	GC	G	7-128850050-GC-G	FLNC	NM_001458.5	c.5277del_p.Gly1760AlafsTer23	1	FS	frameshift_variant	Ex31	NC_000007.14:g.128850051del	NC_000007.14(NM_001458.5):c.5277del	NP_001449.3:p.(Gly1760AlafsTer23)	LIKELY_PATHOGENIC	PVS1,PM2_supporting
7	128838065	G	A	7-128838065-G-A	FLNC	NM_001458.5	c.1047+1G>A_p.?	1	ESS	splice_donor_variant	In6/7	NC_000007.14:g.128838065G>A	NC_000007.14(NM_001458.5):c.1047+1G>A	NP_001449.3:p.(?)	LIKELY_PATHOGENIC	PVS1,PM2_supporting,PP5
7	128843506	GTTGTGCGGGAC	G	7-128843506-GTTGTGCGGGAC-G	FLNC	NM_001458.5	c.2743_2753del_p.Val915Ter	1	SG	frameshift_variant|stop_gained	Ex18	NC_000007.14:g.128843507_128843517del	NC_000007.14(NM_001458.5):c.2743_2753del	NP_001449.3:p.(Val915Ter)	LIKELY_PATHOGENIC	PVS1,PM2_supporting,PP5
7	128857126	TC	T	7-128857126-TC-T	FLNC	NM_001458.5	c.7571del_p.Ser2524Ter	1	SG	frameshift_variant|stop_gained	Ex46	NC_000007.14:g.128857127del	NC_000007.14(NM_001458.5):c.7571del	NP_001449.3:p.(Ser2524Ter)	LIKELY_PATHOGENIC	PVS1,PM2_supporting,PP5
7	128848601	A	T	7-128848601-A-T	FLNC	NM_001458.5	c.4621A>T_p.Lys1541Ter	1	SG	stop_gained	Ex27	NC_000007.14:g.128848601A>T	NC_000007.14(NM_001458.5):c.4621A>T	NP_001449.3:p.(Lys1541Ter)	LIKELY_PATHOGENIC	PVS1,PM2_supporting,PP5
7	128841169	G	A	7-128841169-G-A	FLNC	NM_001458.5	c.1814-1G>A_p.?	1	ESS	splice_acceptor_variant	In11/12	NC_000007.14:g.128841169G>A	NC_000007.14(NM_001458.5):c.1814-1G>A	NP_001449.3:p.(?)	LIKELY_PATHOGENIC	PVS1,PM2_supporting,PP5
7	128842339	TG	T	7-128842339-TG-T	FLNC	NM_001458.5	c.2234del_p.Gly745GlufsTer3	1	FS	frameshift_variant	Ex14	NC_000007.14:g.128842340del	NC_000007.14(NM_001458.5):c.2234del	NP_001449.3:p.(Gly745GlufsTer3)	LIKELY_PATHOGENIC	PVS1,PM2_supporting,PP5
7	128843854	TG	T	7-128843854-TG-T	FLNC	NM_001458.5	c.2872del_p.Val958Ter	1	SG	frameshift_variant|stop_gained	Ex19	NC_000007.14:g.128843855del	NC_000007.14(NM_001458.5):c.2872del	NP_001449.3:p.(Val958Ter)	LIKELY_PATHOGENIC	PVS1,PM2_supporting,PP5
7	128850802	G	A	7-128850802-G-A	FLNC	NM_001458.5	c.5399-1G>A_p.?	1	ESS	splice_acceptor_variant	In32/33	NC_000007.14:g.128850802G>A	NC_000007.14(NM_001458.5):c.5399-1G>A	NP_001449.3:p.(?)	LIKELY_PATHOGENIC	PVS1,PM2_supporting,PP5
7	128846744	G	C	7-128846744-G-C	FLNC	NM_001458.5	c.4128-1G>C_p.?	1	ESS	splice_acceptor_variant	In23/24	NC_000007.14:g.128846744G>C	NC_000007.14(NM_001458.5):c.4128-1G>C	NP_001449.3:p.(?)	LIKELY_PATHOGENIC	PVS1,PM2_supporting,PP5,PS4_NA(BP->PP)
7	128849348	C	T	7-128849348-C-T	FLNC	NM_001458.5	c.4969C>T_p.Arg1657Ter	1	SG	stop_gained	Ex30	NC_000007.14:g.128849348C>T	NC_000007.14(NM_001458.5):c.4969C>T	NP_001449.3:p.(Arg1657Ter)	PATHOGENIC	PVS1,PM2_supporting,PP5,PS4_supporting
7	128846444	C	T	7-128846444-C-T	FLNC	NM_001458.5	c.4108C>T_p.Arg1370Ter	1	SG	stop_gained	Ex23	NC_000007.14:g.128846444C>T	NC_000007.14(NM_001458.5):c.4108C>T	NP_001449.3:p.(Arg1370Ter)	PATHOGENIC	PVS1,PM2_supporting,PP5,PS4_supporting
7	128848974	T	TCGTCACAA	7-128848974-T-TCGTCACAA	FLNC	NM_001458.5	c.4926_4927insACGTCACA_p.Val1643ThrfsTer26	1	FS	splice_region_variant|frameshift_variant	Ex28	NC_000007.14:g.128848974_128848975insCGTCACAA	NC_000007.14(NM_001458.5):c.4926_4927insACGTCACA	NP_001449.3:p.(Val1643ThrfsTer26)	PATHOGENIC	PVS1,PM2_supporting,PP5,PS4_moderate
7	128841565	C	T	7-128841565-C-T	FLNC	NM_001458.5	c.2119C>T_p.Gln707Ter	1	SG	splice_region_variant|stop_gained	Ex13	NC_000007.14:g.128841565C>T	NC_000007.14(NM_001458.5):c.2119C>T	NP_001449.3:p.(Gln707Ter)	PATHOGENIC	PVS1,PM2_supporting,PP5,PS4_supporting
7	128851629	G	A	7-128851629-G-A	FLNC	NM_001458.5	c.5842+1G>A_p.?	1	ESS	splice_donor_variant	In35/36	NC_000007.14:g.128851629G>A	NC_000007.14(NM_001458.5):c.5842+1G>A	NP_001449.3:p.(?)	PATHOGENIC	PVS1,PM2_supporting,PS4_supporting
7	128858474	G	A	7-128858474-G-A	FLNC	NM_001458.5	c.8129G>A_p.Trp2710Ter	1	SG	stop_gained	Ex48	NC_000007.14:g.128858474G>A	NC_000007.14(NM_001458.5):c.8129G>A	NP_001449.3:p.(Trp2710Ter)	PATHOGENIC	PVS1_strong,PM2_supporting,PP5,PS3(NA->PS),PS4_supporting
7	128850073	G	A	7-128850073-G-A	FLNC	NM_001458.5	c.5297G>A_p.Trp1766Ter	1	SG	splice_region_variant|stop_gained	Ex31	NC_000007.14:g.128850073G>A	NC_000007.14(NM_001458.5):c.5297G>A	NP_001449.3:p.(Trp1766Ter)	LIKELY_PATHOGENIC	PVS1,PM2_supporting
7	128842375	G	A	7-128842375-G-A	FLNC	NM_001458.5	c.2265+1G>A_p.?	1	ESS	splice_donor_variant	In14/15	NC_000007.14:g.128842375G>A	NC_000007.14(NM_001458.5):c.2265+1G>A	NP_001449.3:p.(?)	LIKELY_PATHOGENIC	PVS1,PM2_supporting,PP5,PS4_NA(BP->PP)
7	128847824	T	TGGCCGGGCGCCCCTGCG	7-128847824-T-TGGCCGGGCGCCCCTGCG	FLNC	NM_001458.5	c.4432_4433insGGGCCGGGCGCCCCTGC_p.Gln1478ArgfsTer44	1	FS	frameshift_variant	Ex25	NC_000007.14:g.128847824_128847825insGGCCGGGCGCCCCTGCG	NC_000007.14(NM_001458.5):c.4432_4433insGGGCCGGGCGCCCCTGC	NP_001449.3:p.(Gln1478ArgfsTer44)	LIKELY_PATHOGENIC	PVS1,PM2_supporting
7	128840029	A	AC	7-128840029-A-AC	FLNC	NM_001458.5	c.1422dup_p.Asn475GlnfsTer22	1	FS	frameshift_variant	Ex9	NC_000007.14:g.128840029_128840030insC	NC_000007.14(NM_001458.5):c.1422dup	NP_001449.3:p.(Asn475GlnfsTer22)	LIKELY_PATHOGENIC	PVS1,PM2_supporting
7	128852695	GC	G	7-128852695-GC-G	FLNC	NM_001458.5	c.5952del_p.Ser1985ArgfsTer9	1	FS	frameshift_variant	Ex36	NC_000007.14:g.128852696del	NC_000007.14(NM_001458.5):c.5952del	NP_001449.3:p.(Ser1985ArgfsTer9)	LIKELY_PATHOGENIC	PVS1,PM2_supporting
7	128847760	C	CAGGGCTG	7-128847760-C-CAGGGCTG	FLNC	NM_001458.5	c.4353_4359dup_p.Gly1454ArgfsTer59	1	FS	frameshift_variant	Ex25	NC_000007.14:g.128847760_128847761insAGGGCTG	NC_000007.14(NM_001458.5):c.4353_4359dup	NP_001449.3:p.(Gly1454ArgfsTer59)	LIKELY_PATHOGENIC	PVS1,PM2_supporting
7	128849976	G	GCA	7-128849976-G-GCA	FLNC	NM_001458.5	c.5201_5202insAC_p.Cys1735ArgfsTer49	1	FS	splice_region_variant|frameshift_variant	Ex31	NC_000007.14:g.128849976_128849977insCA	NC_000007.14(NM_001458.5):c.5201_5202insAC	NP_001449.3:p.(Cys1735ArgfsTer49)	LIKELY_PATHOGENIC	PVS1,PM2_supporting
7	128844907	A	ACCATT	7-128844907-A-ACCATT	FLNC	NM_001458.5	c.3444_3448dup_p.Arg1150ProfsTer41	1	FS	frameshift_variant	Ex21	NC_000007.14:g.128844907_128844908insCCATT	NC_000007.14(NM_001458.5):c.3444_3448dup	NP_001449.3:p.(Arg1150ProfsTer41)	LIKELY_PATHOGENIC	PVS1,PM2_supporting
7	128840606	GTA	G	7-128840606-GTA-G	FLNC	NM_001458.5	c.1609_1610del_p.Tyr537LeufsTer25	1	FS	frameshift_variant	Ex10	NC_000007.14:g.128840607_128840608del	NC_000007.14(NM_001458.5):c.1609_1610del	NP_001449.3:p.(Tyr537LeufsTer25)	LIKELY_PATHOGENIC	PVS1,PM2_supporting
7	128852743	C	CGG	7-128852743-C-CGG	FLNC	NM_001458.5	c.5996_5997dup_p.His2000GlyfsTer17	1	FS	frameshift_variant	Ex36	NC_000007.14:g.128852743_128852744insGG	NC_000007.14(NM_001458.5):c.5996_5997dup	NP_001449.3:p.(His2000GlyfsTer17)	LIKELY_PATHOGENIC	PVS1,PM2_supporting
7	128835340	G	GTGGA	7-128835340-G-GTGGA	FLNC	NM_001458.5	c.371_374dup_p.Asn126TrpfsTer27	1	FS	frameshift_variant	Ex2	NC_000007.14:g.128835340_128835341insTGGA	NC_000007.14(NM_001458.5):c.371_374dup	NP_001449.3:p.(Asn126TrpfsTer27)	LIKELY_PATHOGENIC	PVS1,PM2_supporting
7	128842311	GC	G	7-128842311-GC-G	FLNC	NM_001458.5	c.2205del_p.Ile736LeufsTer12	1	FS	frameshift_variant	Ex14	NC_000007.14:g.128842312del	NC_000007.14(NM_001458.5):c.2205del	NP_001449.3:p.(Ile736LeufsTer12)	LIKELY_PATHOGENIC	PVS1,PM2_supporting
7	128854818	G	GGCTTGCTT	7-128854818-G-GGCTTGCTT	FLNC	NM_001458.5	c.7041_7042insGCTTGCTT_p.Ser2348AlafsTer79	1	FS	frameshift_variant	Ex42	NC_000007.14:g.128854818_128854819insGCTTGCTT	NC_000007.14(NM_001458.5):c.7041_7042insGCTTGCTT	NP_001449.3:p.(Ser2348AlafsTer79)	LIKELY_PATHOGENIC	PVS1,PM2_supporting
7	128840609	CT	C	7-128840609-CT-C	FLNC	NM_001458.5	c.1612del_p.Tyr538ThrfsTer10	1	FS	frameshift_variant	Ex10	NC_000007.14:g.128840610del	NC_000007.14(NM_001458.5):c.1612del	NP_001449.3:p.(Tyr538ThrfsTer10)	LIKELY_PATHOGENIC	PVS1,PM2_supporting
7	128854180	C	CTT	7-128854180-C-CTT	FLNC	NM_001458.5	c.6692_6693insTT_p.Gly2232TrpfsTer20	1	FS	frameshift_variant	Ex40	NC_000007.14:g.128854180_128854181insTT	NC_000007.14(NM_001458.5):c.6692_6693insTT	NP_001449.3:p.(Gly2232TrpfsTer20)	LIKELY_PATHOGENIC	PVS1,PM2_supporting
7	128841333	G	GC	7-128841333-G-GC	FLNC	NM_001458.5	c.1980dup_p.Ala661ArgfsTer4	1	FS	frameshift_variant	Ex12	NC_000007.14:g.128841333_128841334insC	NC_000007.14(NM_001458.5):c.1980dup	NP_001449.3:p.(Ala661ArgfsTer4)	LIKELY_PATHOGENIC	PVS1,PM2_supporting
7	128847783	G	GC	7-128847783-G-GC	FLNC	NM_001458.5	c.4378dup_p.Arg1460ProfsTer51	1	FS	frameshift_variant	Ex25	NC_000007.14:g.128847783_128847784insC	NC_000007.14(NM_001458.5):c.4378dup	NP_001449.3:p.(Arg1460ProfsTer51)	LIKELY_PATHOGENIC	PVS1,PM2_supporting
7	128848815	A	AG	7-128848815-A-AG	FLNC	NM_001458.5	c.4762dup_p.Ala1588GlyfsTer32	1	FS	frameshift_variant	Ex28	NC_000007.14:g.128848815_128848816insG	NC_000007.14(NM_001458.5):c.4762dup	NP_001449.3:p.(Ala1588GlyfsTer32)	LIKELY_PATHOGENIC	PVS1,PM2_supporting
7	128847839	G	GGCCGGGCGCCCCTA	7-128847839-G-GGCCGGGCGCCCCTA	FLNC	NM_001458.5	c.4431_4432insGCCGGGCGCCCCTA_p.Gln1478AlafsTer43	1	FS	frameshift_variant	Ex25	NC_000007.14:g.128847839_128847840insGCCGGGCGCCCCTA	NC_000007.14(NM_001458.5):c.4431_4432insGCCGGGCGCCCCTA	NP_001449.3:p.(Gln1478AlafsTer43)	LIKELY_PATHOGENIC	PVS1,PM2_supporting
7	128854167	GGGCCGGGAGCGCC	G	7-128854167-GGGCCGGGAGCGCC-G	FLNC	NM_001458.5	c.6679_6691del_p.Gly2227TrpfsTer20	1	FS	frameshift_variant	Ex40	NC_000007.14:g.128854168_128854180del	NC_000007.14(NM_001458.5):c.6679_6691del	NP_001449.3:p.(Gly2227TrpfsTer20)	LIKELY_PATHOGENIC	PVS1,PM2_supporting
7	128844717	CATCGACACCA	C	7-128844717-CATCGACACCA-C	FLNC	NM_001458.5	c.3254_3263del_p.Ile1085ArgfsTer10	1	FS	frameshift_variant	Ex21	NC_000007.14:g.128844718_128844727del	NC_000007.14(NM_001458.5):c.3254_3263del	NP_001449.3:p.(Ile1085ArgfsTer10)	LIKELY_PATHOGENIC	PVS1,PM2_supporting
7	128835384	G	GA	7-128835384-G-GA	FLNC	NM_001458.5	c.412dup_p.Ile138AsnfsTer14	1	FS	frameshift_variant	Ex2	NC_000007.14:g.128835384_128835385insA	NC_000007.14(NM_001458.5):c.412dup	NP_001449.3:p.(Ile138AsnfsTer14)	LIKELY_PATHOGENIC	PVS1,PM2_supporting
7	128847766	TG	T	7-128847766-TG-T	FLNC	NM_001458.5	c.4363del_p.Ala1455LeufsTer61	1	FS	frameshift_variant	Ex25	NC_000007.14:g.128847767del	NC_000007.14(NM_001458.5):c.4363del	NP_001449.3:p.(Ala1455LeufsTer61)	LIKELY_PATHOGENIC	PVS1,PM2_supporting
7	128855305	C	CA	7-128855305-C-CA	FLNC	NM_001458.5	c.7243dup_p.Ser2415LysfsTer27	1	FS	frameshift_variant	Ex43	NC_000007.14:g.128855305_128855306insA	NC_000007.14(NM_001458.5):c.7243dup	NP_001449.3:p.(Ser2415LysfsTer27)	LIKELY_PATHOGENIC	PVS1,PM2_supporting
7	128844187	TG	T	7-128844187-TG-T	FLNC	NM_001458.5	c.3115del_p.Asp1039IlefsTer39	1	FS	frameshift_variant	Ex20	NC_000007.14:g.128844188del	NC_000007.14(NM_001458.5):c.3115del	NP_001449.3:p.(Asp1039IlefsTer39)	PATHOGENIC	PVS1,PM2_supporting,PP3
7	128849539	CG	C	7-128849539-CG-C	FLNC	NM_001458.5	c.5165del_p.Gly1722ValfsTer61	1	FS	frameshift_variant	Ex30	NC_000007.14:g.128849540del	NC_000007.14(NM_001458.5):c.5165del	NP_001449.3:p.(Gly1722ValfsTer61)	PATHOGENIC	PVS1,PM2_supporting,PP3,PP5,PS4_supporting
7	128846129	C	CACCT	7-128846129-C-CACCT	FLNC	NM_001458.5	c.3934_3937dup_p.Arg1313LeufsTer20	1	FS	frameshift_variant	Ex22	NC_000007.14:g.128846129_128846130insACCT	NC_000007.14(NM_001458.5):c.3934_3937dup	NP_001449.3:p.(Arg1313LeufsTer20)	LIKELY_PATHOGENIC	PVS1,PM2_supporting,PP5
7	128853012	C	CG	7-128853012-C-CG	FLNC	NM_001458.5	c.6190dup_p.Val2064GlyfsTer16	1	FS	frameshift_variant	Ex37	NC_000007.14:g.128853012_128853013insG	NC_000007.14(NM_001458.5):c.6190dup	NP_001449.3:p.(Val2064GlyfsTer16)	LIKELY_PATHOGENIC	PVS1,PM2_supporting,PP5
7	128830973	CA	C	7-128830973-CA-C	FLNC	NM_001458.5	c.338del_p.Lys113SerfsTer5	1	FS	frameshift_variant	Ex1	NC_000007.14:g.128830974del	NC_000007.14(NM_001458.5):c.338del	NP_001449.3:p.(Lys113SerfsTer5)	LIKELY_PATHOGENIC	PVS1,PM2_supporting,PP5
7	128853499	GCCCAAGCAAGGTGGACATCA	G	7-128853499-GCCCAAGCAAGGTGGACATCA-G	FLNC	NM_001458.5	c.6240_6259del_p.Pro2081LeufsTer2	1	FS	frameshift_variant	Ex38	NC_000007.14:g.128853500_128853519del	NC_000007.14(NM_001458.5):c.6240_6259del	NP_001449.3:p.(Pro2081LeufsTer2)	PATHOGENIC	PVS1,PM2_supporting,PP5,PS4_supporting
1	156135140	C	CACCCCTCCCAGTCACCACAGTCCTAACCCTTTGTCCTCCCCTCCAGCTGGACAATGCCAGGCAGTCTGCTGAGAGG	1-156135140-C-CACCCCTCCCAGTCACCACAGTCCTAACCCTTTGTCCTCCCCTCCAGCTGGACAATGCCAGGCAGTCTGCTGAGAGG	LMNA	NM_170707.4	c.811-45_841dup_p.Asn281ThrfsTer24	1	FS	frameshift_variant	Ex5	NC_000001.11:g.156135140_156135141insACCCCTCCCAGTCACCACAGTCCTAACCCTTTGTCCTCCCCTCCAGCTGGACAATGCCAGGCAGTCTGCTGAGAGG	NC_000001.11(NM_170707.4):c.811-45_841dup	NP_733821.1:p.(Asn281ThrfsTer24)	LIKELY_PATHOGENIC	PVS1,PM2_supporting
1	156114968	G	GCT	1-156114968-G-GCT	LMNA	NM_170707.4	c.52_53dup_p.Thr19ProfsTer78	1	FS	frameshift_variant	Ex1	NC_000001.11:g.156114968_156114969insCT	NC_000001.11(NM_170707.4):c.52_53dup	NP_733821.1:p.(Thr19ProfsTer78)	PATHOGENIC	PVS1,PM2_supporting,PP5,PS4_supporting
1	156138749	C	CG	1-156138749-C-CG	LMNA	NM_170707.4	c.1961dup_p.Thr655AsnfsTer49	1	FS	frameshift_variant	Ex11	NC_000001.11:g.156138749_156138750insG	NC_000001.11(NM_170707.4):c.1961dup	NP_733821.1:p.(Thr655AsnfsTer49)	LIKELY_PATHOGENIC	PVS1_strong,PM2_supporting,PS4_moderate
1	156137667	G	A	1-156137667-G-A	LMNA	NM_170707.4	c.1622G>A_p.Arg541His	2	NSY	missense_variant	Ex10	NC_000001.11:g.156137667G>A	NC_000001.11(NM_170707.4):c.1622G>A	NP_733821.1:p.(Arg541His)	LIKELY_PATHOGENIC	PM2_supporting,PM5,PP5,BS3_supporting,PS4
1	156135956	G	A	1-156135956-G-A	LMNA	NM_170707.4	c.992G>A_p.Arg331Gln	2	NSY	missense_variant	Ex6	NC_000001.11:g.156135956G>A	NC_000001.11(NM_170707.4):c.992G>A	NP_733821.1:p.(Arg331Gln)	LIKELY_PATHOGENIC	PM2_supporting,PM5,PS3_supporting(BP->PP),PS4	P
1	156137207	C	T	1-156137207-C-T	LMNA	NM_170707.4	c.1583C>T_p.Thr528Met	2	NSY	missense_variant	Ex9	NC_000001.11:g.156137207C>T	NC_000001.11(NM_170707.4):c.1583C>T	NP_733821.1:p.(Thr528Met)	LIKELY_PATHOGENIC	PM2_supporting,PM5,PS3_supporting(BP->PP),PS4_moderate
1	156134811	C	T	1-156134811-C-T	LMNA	NM_170707.4	c.646C>T_p.Arg216Cys	2	NSY	missense_variant	Ex4	NC_000001.11:g.156134811C>T	NC_000001.11(NM_170707.4):c.646C>T	NP_733821.1:p.(Arg216Cys)	LIKELY_PATHOGENIC	PM2_supporting,PS3_supporting(PP->PM),PS4
1	156136009	C	T	1-156136009-C-T	LMNA	NM_170707.4	c.1045C>T_p.Arg349Trp	2	NSY	missense_variant	Ex6	NC_000001.11:g.156136009C>T	NC_000001.11(NM_170707.4):c.1045C>T	NP_733821.1:p.(Arg349Trp)	LIKELY_PATHOGENIC	PM2_supporting,PM5,BS3_supporting,PS4	P
1	156136952	G	A	1-156136952-G-A	LMNA	NM_170707.4	c.1412G>A_p.Arg471His	2	NSY	missense_variant	Ex8	NC_000001.11:g.156136952G>A	NC_000001.11(NM_170707.4):c.1412G>A	NP_733821.1:p.(Arg471His)	LIKELY_PATHOGENIC	PM2_supporting,PM5,PP5,BS3_supporting,PS4
1	156130687	T	C	1-156130687-T-C	LMNA	NM_170707.4	c.427T>C_p.Ser143Pro	2	NSY	missense_variant	Ex2	NC_000001.11:g.156130687T>C	NC_000001.11(NM_170707.4):c.427T>C	NP_733821.1:p.(Ser143Pro)	LIKELY_PATHOGENIC	PM2_supporting,PM5,PP5,PS3(PP->PS),PS4_supporting
1	156134457	C	T	1-156134457-C-T	LMNA	NM_170707.4	c.568C>T_p.Arg190Trp	2	NSY	missense_variant	Ex3	NC_000001.11:g.156134457C>T	NC_000001.11(NM_170707.4):c.568C>T	NP_733821.1:p.(Arg190Trp)	LIKELY_PATHOGENIC	PM2_supporting,PM5,PP5,PS3_NA(BP->PP),PS4
1	156134458	G	A	1-156134458-G-A	LMNA	NM_170707.4	c.569G>A_p.Arg190Gln	2	NSY	missense_variant	Ex3	NC_000001.11:g.156134458G>A	NC_000001.11(NM_170707.4):c.569G>A	NP_733821.1:p.(Arg190Gln)	LIKELY_PATHOGENIC	PM2_supporting,PM5,PP5,PS3_supporting(BP->PP),PS4
1	156136094	G	T	1-156136094-G-T	LMNA	NM_170707.4	c.1130G>T_p.Arg377Leu	2	NSY	missense_variant	Ex6	NC_000001.11:g.156136094G>T	NC_000001.11(NM_170707.4):c.1130G>T	NP_733821.1:p.(Arg377Leu)	LIKELY_PATHOGENIC	PM2_supporting,PM5,PP5,PS3_supporting(PP->PM),PS4_moderate
1	156135967	C	T	1-156135967-C-T	LMNA	NM_170707.4	c.1003C>T_p.Arg335Trp	2	NSY	missense_variant	Ex6	NC_000001.11:g.156135967C>T	NC_000001.11(NM_170707.4):c.1003C>T	NP_733821.1:p.(Arg335Trp)	LIKELY_PATHOGENIC	PM2_supporting,PP5,PS3_supporting(BP->PP),PS4
1	156115231	G	T	1-156115231-G-T	LMNA	NM_170707.4	c.313G>T_p.Glu105Ter	1	SG	stop_gained	Ex1	NC_000001.11:g.156115231G>T	NC_000001.11(NM_170707.4):c.313G>T	NP_733821.1:p.(Glu105Ter)	LIKELY_PATHOGENIC	PVS1,PM2_supporting
1	156135304	C	T	1-156135304-C-T	LMNA	NM_170707.4	c.928C>T_p.Gln310Ter	1	SG	stop_gained	Ex5	NC_000001.11:g.156135304C>T	NC_000001.11(NM_170707.4):c.928C>T	NP_733821.1:p.(Gln310Ter)	LIKELY_PATHOGENIC	PVS1,PM2_supporting,PP5
1	156130615	A	G	1-156130615-A-G	LMNA	NM_170707.4	c.357-2A>G_p.?	1	ESS	splice_acceptor_variant	In1/2	NC_000001.11:g.156130615A>G	NC_000001.11(NM_170707.4):c.357-2A>G	NP_733821.1:p.(?)	PATHOGENIC	PVS1,PM2_supporting,PP5,PS4_supporting
1	156136941	G	A	1-156136941-G-A	LMNA	NM_170707.4	c.1401G>A_p.Trp467Ter	1	SG	stop_gained	Ex8	NC_000001.11:g.156136941G>A	NC_000001.11(NM_170707.4):c.1401G>A	NP_733821.1:p.(Trp467Ter)	PATHOGENIC	PVS1,PM2_supporting,PP5,PS4_supporting
1	156137166	G	A	1-156137166-G-A	LMNA	NM_170707.4	c.1542G>A_p.Trp514Ter	1	SG	stop_gained	Ex9	NC_000001.11:g.156137166G>A	NC_000001.11(NM_170707.4):c.1542G>A	NP_733821.1:p.(Trp514Ter)	PATHOGENIC	PVS1,PM2_supporting,PP5,PS4_supporting
11	47342578	C	G	11-47342578-C-G	MYBPC3	NM_000256.3	c.1624G>C_p.Glu542Gln	2	EE	splice_region_variant|missense_variant	Ex17	NC_000011.10:g.47342578C>G	NC_000011.10(NM_000256.3):c.1624G>C	NP_000247.2:p.(Glu542Gln)	LIKELY_PATHOGENIC	PM2_supporting,BP4,PP5,PS3(PP->PS),PS4_supporting(BP->PS)	P
11	47342698	G	A	11-47342698-G-A	MYBPC3	NM_000256.3	c.1504C>T_p.Arg502Trp	2	NSY	missense_variant	Ex17	NC_000011.10:g.47342698G>A	NC_000011.10(NM_000256.3):c.1504C>T	NP_000247.2:p.(Arg502Trp)	LIKELY_PATHOGENIC	PM2_supporting,PM5,PP5,PS3_NA(BP->PP),PS4	P
11	47342719	G	C	11-47342719-G-C	MYBPC3	NM_000256.3	c.1483C>G_p.Arg495Gly	2	NSY	missense_variant	Ex17	NC_000011.10:g.47342719G>C	NC_000011.10(NM_000256.3):c.1483C>G	NP_000247.2:p.(Arg495Gly)	LIKELY_PATHOGENIC	PM2_supporting,PM5,PP5,PS4
11	47341991	C	T	11-47341991-C-T	MYBPC3	NM_000256.3	c.1790G>A_p.Arg597Gln	2	EE	splice_region_variant|missense_variant	Ex18	NC_000011.10:g.47341991C>T	NC_000011.10(NM_000256.3):c.1790G>A	NP_000247.2:p.(Arg597Gln)	LIKELY_PATHOGENIC	PM2_supporting,PP3,PP5,PS3(PP->PS),PS4_moderate(BP->PS)
11	47346379	C	T	11-47346379-C-T	MYBPC3	NM_000256.3	c.927-9G>A	3	INT	intron_variant	In11/12	NC_000011.10:g.47346379C>T	NC_000011.10(NM_000256.3):c.927-9G>A		LIKELY_PATHOGENIC	PM2_supporting,PP3,PP5,PS3_supporting(BP->PM),PS4	P
11	47343314	C	T	11-47343314-C-T	MYBPC3	NM_000256.3	c.1224-52G>A	3	INT	intron_variant	In13/14	NC_000011.10:g.47343314C>T	NC_000011.10(NM_000256.3):c.1224-52G>A		LIKELY_PATHOGENIC	PM2_supporting,PP3,PP5,PS3_supporting(PP->PM),PS4	P
11	47338520	C	T	11-47338520-C-T	MYBPC3	NM_000256.3	c.2308G>A_p.Asp770Asn	2	EE	splice_region_variant|missense_variant	Ex23	NC_000011.10:g.47338520C>T	NC_000011.10(NM_000256.3):c.2308G>A	NP_000247.2:p.(Asp770Asn)	PATHOGENIC	PM2_supporting,PP3,PS3(PP->PS),PS4	LP
11	47342574	T	A	11-47342574-T-A	MYBPC3	NM_000256.3	c.1624+4A>T_p.?	3	SS	intron_variant|splice_region_variant	In17/18	NC_000011.10:g.47342574T>A	NC_000011.10(NM_000256.3):c.1624+4A>T	NP_000247.2:p.(?)	PATHOGENIC	PM2_supporting,PP5,PS3(PP->PS),PS4
11	47337534	C	T	11-47337534-C-T	MYBPC3	NM_000256.3	c.2459G>A_p.Arg820Gln	2	NSY	missense_variant	Ex25	NC_000011.10:g.47337534C>T	NC_000011.10(NM_000256.3):c.2459G>A	NP_000247.2:p.(Arg820Gln)	PATHOGENIC	PM2_supporting,PP5,PS3(PP->PS),PS4	LP
11	47342611	C	G	11-47342611-C-G	MYBPC3	NM_000256.3	c.1591G>C_p.Gly531Arg	2	NSY	missense_variant	Ex17	NC_000011.10:g.47342611C>G	NC_000011.10(NM_000256.3):c.1591G>C	NP_000247.2:p.(Gly531Arg)	LIKELY_PATHOGENIC	PM2_supporting,PP5,PS3_supporting(PP->PM),PS4
11	47348424	C	T	11-47348424-C-T	MYBPC3	NM_000256.3	c.772G>A_p.Glu258Lys	2	EE	splice_region_variant|missense_variant	Ex6	NC_000011.10:g.47348424C>T	NC_000011.10(NM_000256.3):c.772G>A	NP_000247.2:p.(Glu258Lys)	PATHOGENIC	PM2_supporting,PS3(PP->PS),PS4	LP
11	47347031	T	C	11-47347031-T-C	MYBPC3	NM_000256.3	c.906-2A>G_p.?	1	ESS	splice_acceptor_variant	In9/10	NC_000011.10:g.47347031T>C	NC_000011.10(NM_000256.3):c.906-2A>G	NP_000247.2:p.(?)	LIKELY_PATHOGENIC	PVS1,PM2_supporting
11	47350501	C	T	11-47350501-C-T	MYBPC3	NM_000256.3	c.406+1G>A_p.?	1	ESS	splice_donor_variant	In3/4	NC_000011.10:g.47350501C>T	NC_000011.10(NM_000256.3):c.406+1G>A	NP_000247.2:p.(?)	LIKELY_PATHOGENIC	PVS1,PM2_supporting,PP5
11	47332189	G	A	11-47332189-G-A	MYBPC3	NM_000256.3	c.3697C>T_p.Gln1233Ter	1	SG	stop_gained	Ex33	NC_000011.10:g.47332189G>A	NC_000011.10(NM_000256.3):c.3697C>T	NP_000247.2:p.(Gln1233Ter)	PATHOGENIC	PVS1,PM2_supporting,PP5,PS3_NA(BP->PP),PS4
11	47333192	A	C	11-47333192-A-C	MYBPC3	NM_000256.3	c.3330+2T>G_p.?	1	ESS	splice_donor_variant	In30/31	NC_000011.10:g.47333192A>C	NC_000011.10(NM_000256.3):c.3330+2T>G	NP_000247.2:p.(?)	PATHOGENIC	PVS1,PM2_supporting,PP5,PS3_supporting(PP->PM),PS4
11	47335120	G	A	11-47335120-G-A	MYBPC3	NM_000256.3	c.2827C>T_p.Arg943Ter	1	SG	stop_gained	Ex27	NC_000011.10:g.47335120G>A	NC_000011.10(NM_000256.3):c.2827C>T	NP_000247.2:p.(Arg943Ter)	PATHOGENIC	PVS1,PM2_supporting,PP5,PS3_supporting(PP->PM),PS4
11	47341033	C	T	11-47341033-C-T	MYBPC3	NM_000256.3	c.1898-1G>A_p.?	1	ESS	splice_acceptor_variant	In19/20	NC_000011.10:g.47341033C>T	NC_000011.10(NM_000256.3):c.1898-1G>A	NP_000247.2:p.(?)	PATHOGENIC	PVS1,PM2_supporting,PP5,PS3_supporting(PP->PM),PS4_moderate
11	47333238	C	A	11-47333238-C-A	MYBPC3	NM_000256.3	c.3286G>T_p.Glu1096Ter	1	SG	stop_gained	Ex30	NC_000011.10:g.47333238C>A	NC_000011.10(NM_000256.3):c.3286G>T	NP_000247.2:p.(Glu1096Ter)	PATHOGENIC	PVS1,PM2_supporting,PP5,PS4
11	47351507	T	C	11-47351507-T-C	MYBPC3	NM_000256.3	c.26-2A>G_p.?	1	ESS	splice_acceptor_variant	In1/2	NC_000011.10:g.47351507T>C	NC_000011.10(NM_000256.3):c.26-2A>G	NP_000247.2:p.(?)	PATHOGENIC	PVS1,PM2_supporting,PP5,PS4
11	47347856	C	T	11-47347856-C-T	MYBPC3	NM_000256.3	c.821+1G>A_p.?	1	ESS	splice_donor_variant	In7/8	NC_000011.10:g.47347856C>T	NC_000011.10(NM_000256.3):c.821+1G>A	NP_000247.2:p.(?)	PATHOGENIC	PVS1,PM2_supporting,PP5,PS4
11	47346372	T	C	11-47346372-T-C	MYBPC3	NM_000256.3	c.927-2A>G_p.?	1	ESS	splice_acceptor_variant	In11/12	NC_000011.10:g.47346372T>C	NC_000011.10(NM_000256.3):c.927-2A>G	NP_000247.2:p.(?)	PATHOGENIC	PVS1,PM2_supporting,PP5,PS4
11	47333556	C	T	11-47333556-C-T	MYBPC3	NM_000256.3	c.3190+1G>A_p.?	1	ESS	splice_donor_variant	In29/30	NC_000011.10:g.47333556C>T	NC_000011.10(NM_000256.3):c.3190+1G>A	NP_000247.2:p.(?)	PATHOGENIC	PVS1,PM2_supporting,PP5,PS4
11	47331882	C	T	11-47331882-C-T	MYBPC3	NM_000256.3	c.3815-1G>A_p.?	1	ESS	splice_acceptor_variant	In33/34	NC_000011.10:g.47331882C>T	NC_000011.10(NM_000256.3):c.3815-1G>A	NP_000247.2:p.(?)	PATHOGENIC	PVS1,PM2_supporting,PP5,PS4_moderate
11	47343491	C	T	11-47343491-C-T	MYBPC3	NM_000256.3	c.1223+1G>A_p.?	1	ESS	splice_donor_variant	In13/14	NC_000011.10:g.47343491C>T	NC_000011.10(NM_000256.3):c.1223+1G>A	NP_000247.2:p.(?)	PATHOGENIC	PVS1,PM2_supporting,PP5,PS4_moderate
11	47346206	C	A	11-47346206-C-A	MYBPC3	NM_000256.3	c.1090+1G>T_p.?	1	ESS	splice_donor_variant	In12/13	NC_000011.10:g.47346206C>A	NC_000011.10(NM_000256.3):c.1090+1G>T	NP_000247.2:p.(?)	PATHOGENIC	PVS1,PM2_supporting,PP5,PS4_moderate
11	47332932	G	T	11-47332932-G-T	MYBPC3	NM_000256.3	c.3372C>A_p.Cys1124Ter	1	SG	stop_gained	Ex31	NC_000011.10:g.47332932G>T	NC_000011.10(NM_000256.3):c.3372C>A	NP_000247.2:p.(Cys1124Ter)	PATHOGENIC	PVS1,PM2_supporting,PP5,PS4_moderate
11	47342050	C	T	11-47342050-C-T	MYBPC3	NM_000256.3	c.1731G>A_p.Trp577Ter	1	SG	stop_gained	Ex18	NC_000011.10:g.47342050C>T	NC_000011.10(NM_000256.3):c.1731G>A	NP_000247.2:p.(Trp577Ter)	PATHOGENIC	PVS1,PM2_supporting,PP5,PS4_moderate
11	47336013	T	C	11-47336013-T-C	MYBPC3	NM_000256.3	c.2603-2A>G_p.?	1	ESS	splice_acceptor_variant	In25/26	NC_000011.10:g.47336013T>C	NC_000011.10(NM_000256.3):c.2603-2A>G	NP_000247.2:p.(?)	PATHOGENIC	PVS1,PM2_supporting,PP5,PS4_supporting
11	47332975	T	G	11-47332975-T-G	MYBPC3	NM_000256.3	c.3331-2A>C_p.?	1	ESS	splice_acceptor_variant	In30/31	NC_000011.10:g.47332975T>G	NC_000011.10(NM_000256.3):c.3331-2A>C	NP_000247.2:p.(?)	PATHOGENIC	PVS1,PM2_supporting,PP5,PS4_supporting
11	47347430	T	A	11-47347430-T-A	MYBPC3	NM_000256.3	c.901A>T_p.Lys301Ter	1	SG	stop_gained	Ex9	NC_000011.10:g.47347430T>A	NC_000011.10(NM_000256.3):c.901A>T	NP_000247.2:p.(Lys301Ter)	PATHOGENIC	PVS1,PM2_supporting,PP5,PS4_supporting
11	47337729	A	AC	11-47337729-A-AC	MYBPC3	NM_000256.3	c.2373dup_p.Trp792ValfsTer41	1	FS	frameshift_variant	Ex24	NC_000011.10:g.47337729_47337730insC	NC_000011.10(NM_000256.3):c.2373dup	NP_000247.2:p.(Trp792ValfsTer41)	PATHOGENIC	PVS1,PM2_supporting,PP3,PP5,PS3_supporting(PP->PM),PS4
11	47346626	C	T	11-47346626-C-T	MYBPC3	NM_000256.3	c.926+1G>A_p.?	1	ESS	splice_donor_variant	In11/12	NC_000011.10:g.47346626C>T	NC_000011.10(NM_000256.3):c.926+1G>A	NP_000247.2:p.(?)	PATHOGENIC	PVS1,PM2_supporting,PS4_supporting
11	47347649	A	G	11-47347649-A-G	MYBPC3	NM_000256.3	c.851+2T>C_p.?	1	ESS	splice_donor_variant	In8/9	NC_000011.10:g.47347649A>G	NC_000011.10(NM_000256.3):c.851+2T>C	NP_000247.2:p.(?)	PATHOGENIC	PVS1,PM2_supporting,PS4_supporting
11	47333552	C	T	11-47333552-C-T	MYBPC3	NM_000256.3	c.3190+5G>A_p.?	2	SS5	splice_donor_5th_base_variant	In29/30	NC_000011.10:g.47333552C>T	NC_000011.10(NM_000256.3):c.3190+5G>A	NP_000247.2:p.(?)	PATHOGENIC	PVS1_strong,PM2_supporting,PP5,PS3_supporting(BP->PM),PS4
11	47333189	C	G	11-47333189-C-G	MYBPC3	NM_000256.3	c.3330+5G>C_p.?	2	SS5	splice_donor_5th_base_variant	In30/31	NC_000011.10:g.47333189C>G	NC_000011.10(NM_000256.3):c.3330+5G>C	NP_000247.2:p.(?)	PATHOGENIC	PVS1_strong,PM2_supporting,PP5,PS3_supporting(PP->PM),PS4
11	47332075	G	A	11-47332075-G-A	MYBPC3	NM_000256.3	c.3811C>T_p.Arg1271Ter	1	SG	stop_gained	Ex33	NC_000011.10:g.47332075G>A	NC_000011.10(NM_000256.3):c.3811C>T	NP_000247.2:p.(Arg1271Ter)	PATHOGENIC	PVS1_strong,PM2_supporting,PP5,PS4
11	47348541	C	G	11-47348541-C-G	MYBPC3	NM_000256.3	c.655G>C_p.Val219Leu	2	EE	splice_region_variant|missense_variant	Ex6	NC_000011.10:g.47348541C>G	NC_000011.10(NM_000256.3):c.655G>C	NP_000247.2:p.(Val219Leu)	PATHOGENIC	PM2_supporting,BP4,PP5,PS3(PP->PS),PS4
11	47335081	CAG	C	11-47335081-CAG-C	MYBPC3	NM_000256.3	c.2864_2865del_p.Pro955ArgfsTer95	1	FS	frameshift_variant	Ex27	NC_000011.10:g.47335082_47335083del	NC_000011.10(NM_000256.3):c.2864_2865del	NP_000247.2:p.(Pro955ArgfsTer95)	PATHOGENIC	PVS1,PM2_supporting,PP5,PS3_NA(BP->PP),PS4
11	47342829	C	T	11-47342829-C-T	MYBPC3	NM_000256.3	c.1457+1G>A_p.?	1	ESS	splice_donor_variant	In16/17	NC_000011.10:g.47342829C>T	NC_000011.10(NM_000256.3):c.1457+1G>A	NP_000247.2:p.(?)	LIKELY_PATHOGENIC	PVS1,PM2_supporting
11	47343259	C	G	11-47343259-C-G	MYBPC3	NM_000256.3	c.1226+1G>C_p.?	1	ESS	splice_donor_variant	In14/15	NC_000011.10:g.47343259C>G	NC_000011.10(NM_000256.3):c.1226+1G>C	NP_000247.2:p.(?)	LIKELY_PATHOGENIC	PVS1,PM2_supporting
11	47332692	A	T	11-47332692-A-T	MYBPC3	NM_000256.3	c.3501T>A_p.Tyr1167Ter	1	SG	stop_gained	Ex32	NC_000011.10:g.47332692A>T	NC_000011.10(NM_000256.3):c.3501T>A	NP_000247.2:p.(Tyr1167Ter)	LIKELY_PATHOGENIC	PVS1,PM2_supporting
11	47341234	GT	G	11-47341234-GT-G	MYBPC3	NM_000256.3	c.1800del_p.Lys600AsnfsTer2	1	FS	frameshift_variant	Ex19	NC_000011.10:g.47341235del	NC_000011.10(NM_000256.3):c.1800del	NP_000247.2:p.(Lys600AsnfsTer2)	PATHOGENIC	PVS1,PM2_supporting,PP5,PS4
11	47333297	T	TA	11-47333297-T-TA	MYBPC3	NM_000256.3	c.3226_3227insT_p.Asp1076ValfsTer6	1	FS	frameshift_variant	Ex30	NC_000011.10:g.47333297_47333298insA	NC_000011.10(NM_000256.3):c.3226_3227insT	NP_000247.2:p.(Asp1076ValfsTer6)	PATHOGENIC	PVS1,PM2_supporting,PP5,PS4
11	47347424	AC	A	11-47347424-AC-A	MYBPC3	NM_000256.3	c.905+1del_p.?	1	ESS	splice_donor_variant	In9/10	NC_000011.10:g.47347425del	NC_000011.10(NM_000256.3):c.905+1del	NP_000247.2:p.(?)	LIKELY_PATHOGENIC	PVS1,PM2_supporting
11	47350616	C	T	11-47350616-C-T	MYBPC3	NM_000256.3	c.293-1G>A_p.?	1	ESS	splice_acceptor_variant	In2/3	NC_000011.10:g.47350616C>T	NC_000011.10(NM_000256.3):c.293-1G>A	NP_000247.2:p.(?)	LIKELY_PATHOGENIC	PVS1,PM2_supporting
11	47347668	TC	T	11-47347668-TC-T	MYBPC3	NM_000256.3	c.833del_p.Gly278GlufsTer22	1	FS	frameshift_variant	Ex8	NC_000011.10:g.47347669del	NC_000011.10(NM_000256.3):c.833del	NP_000247.2:p.(Gly278GlufsTer22)	PATHOGENIC	PVS1,PM2_supporting,PP5,PS4
11	47337502	G	GA	11-47337502-G-GA	MYBPC3	NM_000256.3	c.2490dup_p.His831SerfsTer2	1	FS	frameshift_variant	Ex25	NC_000011.10:g.47337502_47337503insA	NC_000011.10(NM_000256.3):c.2490dup	NP_000247.2:p.(His831SerfsTer2)	PATHOGENIC	PVS1,PM2_supporting,PP5,PS4
11	47351478	G	T	11-47351478-G-T	MYBPC3	NM_000256.3	c.53C>A_p.Ser18Ter	1	SG	stop_gained	Ex2	NC_000011.10:g.47351478G>T	NC_000011.10(NM_000256.3):c.53C>A	NP_000247.2:p.(Ser18Ter)	PATHOGENIC	PVS1,PM2_supporting,PP3,PP5
11	47333924	G	A	11-47333924-G-A	MYBPC3	NM_000256.3	c.2992C>T_p.Gln998Ter	1	SG	splice_region_variant|stop_gained	Ex28	NC_000011.10:g.47333924G>A	NC_000011.10(NM_000256.3):c.2992C>T	NP_000247.2:p.(Gln998Ter)	PATHOGENIC	PVS1,PM2_supporting,PP3,PP5,PS4_supporting
11	47338569	C	CA	11-47338569-C-CA	MYBPC3	NM_000256.3	c.2258dup_p.Lys754GlufsTer79	1	FS	frameshift_variant	Ex23	NC_000011.10:g.47338569_47338570insA	NC_000011.10(NM_000256.3):c.2258dup	NP_000247.2:p.(Lys754GlufsTer79)	PATHOGENIC	PVS1,PM2_supporting,PP5,PS4_supporting
11	47337437	G	GA	11-47337437-G-GA	MYBPC3	NM_000256.3	c.2555dup_p.Gly853ArgfsTer31	1	FS	frameshift_variant	Ex25	NC_000011.10:g.47337437_47337438insA	NC_000011.10(NM_000256.3):c.2555dup	NP_000247.2:p.(Gly853ArgfsTer31)	PATHOGENIC	PVS1,PM2_supporting,PP5,PS4_supporting
11	47347425	C	T	11-47347425-C-T	MYBPC3	NM_000256.3	c.905+1G>A_p.?	1	ESS	splice_donor_variant	In9/10	NC_000011.10:g.47347425C>T	NC_000011.10(NM_000256.3):c.905+1G>A	NP_000247.2:p.(?)	LIKELY_PATHOGENIC	PVS1,PM2_supporting,PP5
11	47351410	G	GCACCTTCACTCCTGCCCGCT	11-47351410-G-GCACCTTCACTCCTGCCCGCT	MYBPC3	NM_000256.3	c.101_120dup_p.Arg41SerfsTer5	1	FS	frameshift_variant	Ex2	NC_000011.10:g.47351410_47351411insCACCTTCACTCCTGCCCGCT	NC_000011.10(NM_000256.3):c.101_120dup	NP_000247.2:p.(Arg41SerfsTer5)	LIKELY_PATHOGENIC	PVS1,PM2_supporting
11	47338631	GGT	G	11-47338631-GGT-G	MYBPC3	NM_000256.3	c.2195_2196del_p.Asp732AlafsTer14	1	FS	frameshift_variant	Ex23	NC_000011.10:g.47338632_47338633del	NC_000011.10(NM_000256.3):c.2195_2196del	NP_000247.2:p.(Asp732AlafsTer14)	LIKELY_PATHOGENIC	PVS1,PM2_supporting
11	47351440	CCTCGAACACGGCAGGG	C	11-47351440-CCTCGAACACGGCAGGG-C	MYBPC3	NM_000256.3	c.75_90del_p.Ser25ArgfsTer9	1	FS	frameshift_variant	Ex2	NC_000011.10:g.47351441_47351456del	NC_000011.10(NM_000256.3):c.75_90del	NP_000247.2:p.(Ser25ArgfsTer9)	LIKELY_PATHOGENIC	PVS1,PM2_supporting
11	47341183	GCACAAAGCTGTAGTCAGCCTCGT	G	11-47341183-GCACAAAGCTGTAGTCAGCCTCGT-G	MYBPC3	NM_000256.3	c.1829_1851del_p.Asp610AlafsTer20	1	FS	frameshift_variant	Ex19	NC_000011.10:g.47341184_47341206del	NC_000011.10(NM_000256.3):c.1829_1851del	NP_000247.2:p.(Asp610AlafsTer20)	LIKELY_PATHOGENIC	PVS1,PM2_supporting
11	47351293	CG	C	11-47351293-CG-C	MYBPC3	NM_000256.3	c.237del_p.Tyr79Ter	1	SG	frameshift_variant|stop_gained	Ex2	NC_000011.10:g.47351294del	NC_000011.10(NM_000256.3):c.237del	NP_000247.2:p.(Tyr79Ter)	LIKELY_PATHOGENIC	PVS1,PM2_supporting,PP5
11	47343146	C	T	11-47343146-C-T	MYBPC3	NM_000256.3	c.1227-1G>A_p.?	1	ESS	splice_acceptor_variant	In14/15	NC_000011.10:g.47343146C>T	NC_000011.10(NM_000256.3):c.1227-1G>A	NP_000247.2:p.(?)	LIKELY_PATHOGENIC	PVS1,PM2_supporting,PP5
11	47335057	CTG	C	11-47335057-CTG-C	MYBPC3	NM_000256.3	c.2888_2889del_p.Thr963SerfsTer87	1	FS	frameshift_variant	Ex27	NC_000011.10:g.47335058_47335059del	NC_000011.10(NM_000256.3):c.2888_2889del	NP_000247.2:p.(Thr963SerfsTer87)	PATHOGENIC	PVS1,PM2_supporting,PP3
11	47337466	CG	C	11-47337466-CG-C	MYBPC3	NM_000256.3	c.2526del_p.Tyr842Ter	1	SG	frameshift_variant|stop_gained	Ex25	NC_000011.10:g.47337467del	NC_000011.10(NM_000256.3):c.2526del	NP_000247.2:p.(Tyr842Ter)	LIKELY_PATHOGENIC	PVS1,PM2_supporting,PP5
11	47333556	C	A	11-47333556-C-A	MYBPC3	NM_000256.3	c.3190+1G>T_p.?	1	ESS	splice_donor_variant	In29/30	NC_000011.10:g.47333556C>A	NC_000011.10(NM_000256.3):c.3190+1G>T	NP_000247.2:p.(?)	LIKELY_PATHOGENIC	PVS1,PM2_supporting,PP5
11	47341206	TC	T	11-47341206-TC-T	MYBPC3	NM_000256.3	c.1828del_p.Asp610ThrfsTer53	1	FS	frameshift_variant	Ex19	NC_000011.10:g.47341207del	NC_000011.10(NM_000256.3):c.1828del	NP_000247.2:p.(Asp610ThrfsTer53)	LIKELY_PATHOGENIC	PVS1,PM2_supporting,PP5
11	47337416	A	AGGGCT	11-47337416-A-AGGGCT	MYBPC3	NM_000256.3	c.2572_2576dup_p.Ser861LeufsTer20	1	FS	frameshift_variant	Ex25	NC_000011.10:g.47337416_47337417insGGGCT	NC_000011.10(NM_000256.3):c.2572_2576dup	NP_000247.2:p.(Ser861LeufsTer20)	LIKELY_PATHOGENIC	PVS1,PM2_supporting,PP5
11	47335944	C	T	11-47335944-C-T	MYBPC3	NM_000256.3	c.2670G>A_p.Trp890Ter	1	SG	stop_gained	Ex26	NC_000011.10:g.47335944C>T	NC_000011.10(NM_000256.3):c.2670G>A	NP_000247.2:p.(Trp890Ter)	PATHOGENIC	PVS1,PM2_supporting,PP5,PS3_NA(BP->PP),PS4
11	47339792	T	C	11-47339792-T-C	MYBPC3	NM_000256.3	c.1928-2A>G_p.?	1	ESS	splice_acceptor_variant	In20/21	NC_000011.10:g.47339792T>C	NC_000011.10(NM_000256.3):c.1928-2A>G	NP_000247.2:p.(?)	PATHOGENIC	PVS1,PM2_supporting,PP5,PS3_NA(BP->PP),PS4
11	47332196	GA	G	11-47332196-GA-G	MYBPC3	NM_000256.3	c.3689del_p.Phe1230SerfsTer7	1	FS	frameshift_variant	Ex33	NC_000011.10:g.47332197del	NC_000011.10(NM_000256.3):c.3689del	NP_000247.2:p.(Phe1230SerfsTer7)	LIKELY_PATHOGENIC	PVS1,PM2_supporting,PP5
11	47352622	C	T	11-47352622-C-T	MYBPC3	NM_000256.3	c.25+1G>A_p.?	1	ESS	splice_donor_variant	In1/2	NC_000011.10:g.47352622C>T	NC_000011.10(NM_000256.3):c.25+1G>A	NP_000247.2:p.(?)	PATHOGENIC	PVS1,PM2_supporting,PP5,PS4
11	47332704	T	A	11-47332704-T-A	MYBPC3	NM_000256.3	c.3491-2A>T_p.?	1	ESS	splice_acceptor_variant	In31/32	NC_000011.10:g.47332704T>A	NC_000011.10(NM_000256.3):c.3491-2A>T	NP_000247.2:p.(?)	PATHOGENIC	PVS1,PM2_supporting,PP5,PS4
11	47335042	G	A	11-47335042-G-A	MYBPC3	NM_000256.3	c.2905C>T_p.Gln969Ter	1	SG	splice_region_variant|stop_gained	Ex27	NC_000011.10:g.47335042G>A	NC_000011.10(NM_000256.3):c.2905C>T	NP_000247.2:p.(Gln969Ter)	PATHOGENIC	PVS1,PM2_supporting,PP5,PS4
11	47337796	T	C	11-47337796-T-C	MYBPC3	NM_000256.3	c.2309-2A>G_p.?	1	ESS	splice_acceptor_variant	In23/24	NC_000011.10:g.47337796T>C	NC_000011.10(NM_000256.3):c.2309-2A>G	NP_000247.2:p.(?)	PATHOGENIC	PVS1,PM2_supporting,PP5,PS4
11	47333741	CCG	C	11-47333741-CCG-C	MYBPC3	NM_000256.3	c.3004_3005del_p.Arg1002AlafsTer48	1	FS	frameshift_variant	Ex29	NC_000011.10:g.47333742_47333743del	NC_000011.10(NM_000256.3):c.3004_3005del	NP_000247.2:p.(Arg1002AlafsTer48)	LIKELY_PATHOGENIC	PVS1,PM2_supporting,PP5
11	47332896	G	T	11-47332896-G-T	MYBPC3	NM_000256.3	c.3408C>A_p.Tyr1136Ter	1	SG	stop_gained	Ex31	NC_000011.10:g.47332896G>T	NC_000011.10(NM_000256.3):c.3408C>A	NP_000247.2:p.(Tyr1136Ter)	PATHOGENIC	PVS1,PM2_supporting,PP5,PS4
11	47337467	G	C	11-47337467-G-C	MYBPC3	NM_000256.3	c.2526C>G_p.Tyr842Ter	1	SG	stop_gained	Ex25	NC_000011.10:g.47337467G>C	NC_000011.10(NM_000256.3):c.2526C>G	NP_000247.2:p.(Tyr842Ter)	PATHOGENIC	PVS1,PM2_supporting,PP5,PS4
11	47339650	C	T	11-47339650-C-T	MYBPC3	NM_000256.3	c.2067+1G>A_p.?	1	ESS	splice_donor_variant	In21/22	NC_000011.10:g.47339650C>T	NC_000011.10(NM_000256.3):c.2067+1G>A	NP_000247.2:p.(?)	PATHOGENIC	PVS1,PM2_supporting,PP5,PS4
11	47343505	G	A	11-47343505-G-A	MYBPC3	NM_000256.3	c.1210C>T_p.Gln404Ter	1	SG	stop_gained	Ex13	NC_000011.10:g.47343505G>A	NC_000011.10(NM_000256.3):c.1210C>T	NP_000247.2:p.(Gln404Ter)	PATHOGENIC	PVS1,PM2_supporting,PP5,PS4
11	47338519	C	T	11-47338519-C-T	MYBPC3	NM_000256.3	c.2308+1G>A_p.?	1	ESS	splice_donor_variant	In23/24	NC_000011.10:g.47338519C>T	NC_000011.10(NM_000256.3):c.2308+1G>A	NP_000247.2:p.(?)	PATHOGENIC	PVS1,PM2_supporting,PP5,PS4
11	47337452	G	C	11-47337452-G-C	MYBPC3	NM_000256.3	c.2541C>G_p.Tyr847Ter	1	SG	stop_gained	Ex25	NC_000011.10:g.47337452G>C	NC_000011.10(NM_000256.3):c.2541C>G	NP_000247.2:p.(Tyr847Ter)	PATHOGENIC	PVS1,PM2_supporting,PP5,PS4
11	47332244	C	T	11-47332244-C-T	MYBPC3	NM_000256.3	c.3642G>A_p.Trp1214Ter	1	SG	stop_gained	Ex33	NC_000011.10:g.47332244C>T	NC_000011.10(NM_000256.3):c.3642G>A	NP_000247.2:p.(Trp1214Ter)	LIKELY_PATHOGENIC	PVS1,PM2_supporting,PP5,PS4_NA(BP->PP)
11	47350502	C	CT	11-47350502-C-CT	MYBPC3	NM_000256.3	c.405dup_p.Gly136ArgfsTer17	1	FS	splice_region_variant|frameshift_variant	Ex3	NC_000011.10:g.47350502_47350503insT	NC_000011.10(NM_000256.3):c.405dup	NP_000247.2:p.(Gly136ArgfsTer17)	LIKELY_PATHOGENIC	PVS1,PM2_supporting,PP5
11	47338680	C	T	11-47338680-C-T	MYBPC3	NM_000256.3	c.2149-1G>A_p.?	1	ESS	splice_acceptor_variant	In22/23	NC_000011.10:g.47338680C>T	NC_000011.10(NM_000256.3):c.2149-1G>A	NP_000247.2:p.(?)	PATHOGENIC	PVS1,PM2_supporting,PP5,PS4_moderate
11	47342576	A	G	11-47342576-A-G	MYBPC3	NM_000256.3	c.1624+2T>C_p.?	1	ESS	splice_donor_variant	In17/18	NC_000011.10:g.47342576A>G	NC_000011.10(NM_000256.3):c.1624+2T>C	NP_000247.2:p.(?)	PATHOGENIC	PVS1,PM2_supporting,PP5,PS4_moderate
11	47337539	C	T	11-47337539-C-T	MYBPC3	NM_000256.3	c.2454G>A_p.Trp818Ter	1	SG	stop_gained	Ex25	NC_000011.10:g.47337539C>T	NC_000011.10(NM_000256.3):c.2454G>A	NP_000247.2:p.(Trp818Ter)	PATHOGENIC	PVS1,PM2_supporting,PP5,PS4_moderate
11	47347463	TG	T	11-47347463-TG-T	MYBPC3	NM_000256.3	c.867del_p.Asp289GlufsTer11	1	FS	frameshift_variant	Ex9	NC_000011.10:g.47347464del	NC_000011.10(NM_000256.3):c.867del	NP_000247.2:p.(Asp289GlufsTer11)	LIKELY_PATHOGENIC	PVS1,PM2_supporting,PP5
11	47346298	G	C	11-47346298-G-C	MYBPC3	NM_000256.3	c.999C>G_p.Tyr333Ter	1	SG	stop_gained	Ex12	NC_000011.10:g.47346298G>C	NC_000011.10(NM_000256.3):c.999C>G	NP_000247.2:p.(Tyr333Ter)	PATHOGENIC	PVS1,PM2_supporting,PP5,PS4_moderate
11	47335200	C	T	11-47335200-C-T	MYBPC3	NM_000256.3	c.2747G>A_p.Trp916Ter	1	SG	stop_gained	Ex27	NC_000011.10:g.47335200C>T	NC_000011.10(NM_000256.3):c.2747G>A	NP_000247.2:p.(Trp916Ter)	PATHOGENIC	PVS1,PM2_supporting,PP5,PS4_moderate
11	47341137	C	T	11-47341137-C-T	MYBPC3	NM_000256.3	c.1897+1G>A_p.?	1	ESS	splice_donor_variant	In19/20	NC_000011.10:g.47341137C>T	NC_000011.10(NM_000256.3):c.1897+1G>A	NP_000247.2:p.(?)	PATHOGENIC	PVS1,PM2_supporting,PP5,PS4_moderate
11	47346331	C	T	11-47346331-C-T	MYBPC3	NM_000256.3	c.966G>A_p.Trp322Ter	1	SG	stop_gained	Ex12	NC_000011.10:g.47346331C>T	NC_000011.10(NM_000256.3):c.966G>A	NP_000247.2:p.(Trp322Ter)	PATHOGENIC	PVS1,PM2_supporting,PP5,PS4_moderate
11	47337481	CG	C	11-47337481-CG-C	MYBPC3	NM_000256.3	c.2511del_p.Ile837MetfsTer42	1	FS	frameshift_variant	Ex25	NC_000011.10:g.47337482del	NC_000011.10(NM_000256.3):c.2511del	NP_000247.2:p.(Ile837MetfsTer42)	LIKELY_PATHOGENIC	PVS1,PM2_supporting,PP5
11	47348423	C	T	11-47348423-C-T	MYBPC3	NM_000256.3	c.772+1G>A_p.?	1	ESS	splice_donor_variant	In6/7	NC_000011.10:g.47348423C>T	NC_000011.10(NM_000256.3):c.772+1G>A	NP_000247.2:p.(?)	PATHOGENIC	PVS1,PM2_supporting,PP5,PS4_moderate
11	47351294	G	C	11-47351294-G-C	MYBPC3	NM_000256.3	c.237C>G_p.Tyr79Ter	1	SG	stop_gained	Ex2	NC_000011.10:g.47351294G>C	NC_000011.10(NM_000256.3):c.237C>G	NP_000247.2:p.(Tyr79Ter)	PATHOGENIC	PVS1,PM2_supporting,PP5,PS4_moderate(PM->PS)
11	47339323	C	A	11-47339323-C-A	MYBPC3	NM_000256.3	c.2148+1G>T_p.?	1	ESS	splice_donor_variant	In22/23	NC_000011.10:g.47339323C>A	NC_000011.10(NM_000256.3):c.2148+1G>T	NP_000247.2:p.(?)	PATHOGENIC	PVS1,PM2_supporting,PP5,PS4_supporting
11	47347645	GGGTACCTGATCCGCCGA	G	11-47347645-GGGTACCTGATCCGCCGA-G	MYBPC3	NM_000256.3	c.840_851+5del_p.?	1	ESS	splice_acceptor_variant	Ex8-In8/9	NC_000011.10:g.47347646_47347662del	NC_000011.10(NM_000256.3):c.840_851+5del	NP_000247.2:p.(?)	PATHOGENIC	PVS1,PM2_supporting,PP5,PS4_supporting
11	47333192	A	G	11-47333192-A-G	MYBPC3	NM_000256.3	c.3330+2T>C_p.?	1	ESS	splice_donor_variant	In30/31	NC_000011.10:g.47333192A>G	NC_000011.10(NM_000256.3):c.3330+2T>C	NP_000247.2:p.(?)	PATHOGENIC	PVS1,PM2_supporting,PP5,PS4_supporting
11	47350078	AG	A	11-47350078-AG-A	MYBPC3	NM_000256.3	c.440del_p.Pro147LeufsTer12	1	FS	frameshift_variant	Ex4	NC_000011.10:g.47350079del	NC_000011.10(NM_000256.3):c.440del	NP_000247.2:p.(Pro147LeufsTer12)	LIKELY_PATHOGENIC	PVS1,PM2_supporting,PP5
11	47343552	G	GC	11-47343552-G-GC	MYBPC3	NM_000256.3	c.1162dup_p.Ala388GlyfsTer2	1	FS	frameshift_variant	Ex13	NC_000011.10:g.47343552_47343553insC	NC_000011.10(NM_000256.3):c.1162dup	NP_000247.2:p.(Ala388GlyfsTer2)	LIKELY_PATHOGENIC	PVS1,PM2_supporting,PP5
11	47339375	TG	T	11-47339375-TG-T	MYBPC3	NM_000256.3	c.2096del_p.Pro699GlnfsTer55	1	FS	frameshift_variant	Ex22	NC_000011.10:g.47339376del	NC_000011.10(NM_000256.3):c.2096del	NP_000247.2:p.(Pro699GlnfsTer55)	PATHOGENIC	PVS1,PM2_supporting,PP5,PS4
11	47349923	C	T	11-47349923-C-T	MYBPC3	NM_000256.3	c.506-1G>A_p.?	1	ESS	splice_acceptor_variant	In4/5	NC_000011.10:g.47349923C>T	NC_000011.10(NM_000256.3):c.506-1G>A	NP_000247.2:p.(?)	PATHOGENIC	PVS1,PM2_supporting,PP5,PS4_supporting
11	47351343	CGTGTGCCCTCT	C	11-47351343-CGTGTGCCCTCT-C	MYBPC3	NM_000256.3	c.177_187del_p.Glu60AlafsTer49	1	FS	frameshift_variant	Ex2	NC_000011.10:g.47351344_47351354del	NC_000011.10(NM_000256.3):c.177_187del	NP_000247.2:p.(Glu60AlafsTer49)	PATHOGENIC	PVS1,PM2_supporting,PP5,PS4
11	47337434	GC	G	11-47337434-GC-G	MYBPC3	NM_000256.3	c.2558del_p.Gly853AlafsTer26	1	FS	frameshift_variant	Ex25	NC_000011.10:g.47337435del	NC_000011.10(NM_000256.3):c.2558del	NP_000247.2:p.(Gly853AlafsTer26)	PATHOGENIC	PVS1,PM2_supporting,PP5,PS4_moderate
11	47346626	C	G	11-47346626-C-G	MYBPC3	NM_000256.3	c.926+1G>C_p.?	1	ESS	splice_donor_variant	In11/12	NC_000011.10:g.47346626C>G	NC_000011.10(NM_000256.3):c.926+1G>C	NP_000247.2:p.(?)	PATHOGENIC	PVS1,PM2_supporting,PP5,PS4_supporting
11	47342138	TAC	T	11-47342138-TAC-T	MYBPC3	NM_000256.3	c.1641_1642del_p.Tyr548ProfsTer19	1	FS	frameshift_variant	Ex18	NC_000011.10:g.47342139_47342140del	NC_000011.10(NM_000256.3):c.1641_1642del	NP_000247.2:p.(Tyr548ProfsTer19)	PATHOGENIC	PVS1,PM2_supporting,PP5,PS4_moderate
11	47350617	T	C	11-47350617-T-C	MYBPC3	NM_000256.3	c.293-2A>G_p.?	1	ESS	splice_acceptor_variant	In2/3	NC_000011.10:g.47350617T>C	NC_000011.10(NM_000256.3):c.293-2A>G	NP_000247.2:p.(?)	PATHOGENIC	PVS1,PM2_supporting,PP5,PS4_supporting
11	47350103	G	C	11-47350103-G-C	MYBPC3	NM_000256.3	c.416C>G_p.Ser139Ter	1	SG	stop_gained	Ex4	NC_000011.10:g.47350103G>C	NC_000011.10(NM_000256.3):c.416C>G	NP_000247.2:p.(Ser139Ter)	PATHOGENIC	PVS1,PM2_supporting,PP5,PS4_supporting
11	47338560	AG	A	11-47338560-AG-A	MYBPC3	NM_000256.3	c.2267del_p.Pro756LeufsTer66	1	FS	frameshift_variant	Ex23	NC_000011.10:g.47338561del	NC_000011.10(NM_000256.3):c.2267del	NP_000247.2:p.(Pro756LeufsTer66)	PATHOGENIC	PVS1,PM2_supporting,PP5,PS4_moderate
11	47349876	C	CA	11-47349876-C-CA	MYBPC3	NM_000256.3	c.551dup_p.Lys185GlufsTer56	1	FS	frameshift_variant	Ex5	NC_000011.10:g.47349876_47349877insA	NC_000011.10(NM_000256.3):c.551dup	NP_000247.2:p.(Lys185GlufsTer56)	PATHOGENIC	PVS1,PM2_supporting,PP5,PS4_supporting
11	47333963	T	A	11-47333963-T-A	MYBPC3	NM_000256.3	c.2953A>T_p.Lys985Ter	1	SG	stop_gained	Ex28	NC_000011.10:g.47333963T>A	NC_000011.10(NM_000256.3):c.2953A>T	NP_000247.2:p.(Lys985Ter)	PATHOGENIC	PVS1,PM2_supporting,PP5,PS4_supporting
11	47346282	G	A	11-47346282-G-A	MYBPC3	NM_000256.3	c.1015C>T_p.Gln339Ter	1	SG	stop_gained	Ex12	NC_000011.10:g.47346282G>A	NC_000011.10(NM_000256.3):c.1015C>T	NP_000247.2:p.(Gln339Ter)	PATHOGENIC	PVS1,PM2_supporting,PP5,PS4_supporting
11	47333617	G	A	11-47333617-G-A	MYBPC3	NM_000256.3	c.3130C>T_p.Gln1044Ter	1	SG	stop_gained	Ex29	NC_000011.10:g.47333617G>A	NC_000011.10(NM_000256.3):c.3130C>T	NP_000247.2:p.(Gln1044Ter)	PATHOGENIC	PVS1,PM2_supporting,PP5,PS4_supporting
11	47335876	C	T	11-47335876-C-T	MYBPC3	NM_000256.3	c.2737+1G>A_p.?	1	ESS	splice_donor_variant	In26/27	NC_000011.10:g.47335876C>T	NC_000011.10(NM_000256.3):c.2737+1G>A	NP_000247.2:p.(?)	PATHOGENIC	PVS1,PM2_supporting,PP5,PS4_supporting
11	47335041	C	T	11-47335041-C-T	MYBPC3	NM_000256.3	c.2905+1G>A_p.?	1	ESS	splice_donor_variant	In27/28	NC_000011.10:g.47335041C>T	NC_000011.10(NM_000256.3):c.2905+1G>A	NP_000247.2:p.(?)	PATHOGENIC	PVS1,PM2_supporting,PS3_supporting(PP->PM),PS4
11	47335872	C	T	11-47335872-C-T	MYBPC3	NM_000256.3	c.2737+5G>A_p.?	2	SS5	splice_donor_5th_base_variant	In26/27	NC_000011.10:g.47335872C>T	NC_000011.10(NM_000256.3):c.2737+5G>A	NP_000247.2:p.(?)	LIKELY_PATHOGENIC	PVS1_strong,PM2_supporting,PS4_supporting
11	47335894	TCCACGCTGTAG	T	11-47335894-TCCACGCTGTAG-T	MYBPC3	NM_000256.3	c.2709_2719del_p.Tyr904ValfsTer143	1	FS	frameshift_variant	Ex26	NC_000011.10:g.47335895_47335905del	NC_000011.10(NM_000256.3):c.2709_2719del	NP_000247.2:p.(Tyr904ValfsTer143)	PATHOGENIC	PVS1,PM2_supporting,PP5,PS4_supporting
11	47350557	AG	A	11-47350557-AG-A	MYBPC3	NM_000256.3	c.350del_p.Pro117LeufsTer42	1	FS	frameshift_variant	Ex3	NC_000011.10:g.47350558del	NC_000011.10(NM_000256.3):c.350del	NP_000247.2:p.(Pro117LeufsTer42)	PATHOGENIC	PVS1,PM2_supporting,PP5,PS4_supporting
11	47337488	GC	G	11-47337488-GC-G	MYBPC3	NM_000256.3	c.2504del_p.Arg835ProfsTer2	1	FS	frameshift_variant	Ex25	NC_000011.10:g.47337489del	NC_000011.10(NM_000256.3):c.2504del	NP_000247.2:p.(Arg835ProfsTer2)	PATHOGENIC	PVS1,PM2_supporting,PP5,PS4_supporting
11	47347433	TC	T	11-47347433-TC-T	MYBPC3	NM_000256.3	c.897del_p.Lys301ArgfsTer49	1	FS	frameshift_variant	Ex9	NC_000011.10:g.47347434del	NC_000011.10(NM_000256.3):c.897del	NP_000247.2:p.(Lys301ArgfsTer49)	PATHOGENIC	PVS1,PM2_supporting,PP5,PS4_supporting
11	47342050	CCA	C	11-47342050-CCA-C	MYBPC3	NM_000256.3	c.1729_1730del_p.Trp577AlafsTer27	1	FS	frameshift_variant	Ex18	NC_000011.10:g.47342051_47342052del	NC_000011.10(NM_000256.3):c.1729_1730del	NP_000247.2:p.(Trp577AlafsTer27)	PATHOGENIC	PVS1,PM2_supporting,PP5,PS4_supporting
11	47332171	CCA	C	11-47332171-CCA-C	MYBPC3	NM_000256.3	c.3713_3714del_p.Leu1238ArgfsTer3	1	FS	frameshift_variant	Ex33	NC_000011.10:g.47332172_47332173del	NC_000011.10(NM_000256.3):c.3713_3714del	NP_000247.2:p.(Leu1238ArgfsTer3)	PATHOGENIC	PVS1,PM2_supporting,PP5,PS4_supporting
11	47342598	AGC	A	11-47342598-AGC-A	MYBPC3	NM_000256.3	c.1602_1603del_p.Leu535GlyfsTer2	1	FS	frameshift_variant	Ex17	NC_000011.10:g.47342599_47342600del	NC_000011.10(NM_000256.3):c.1602_1603del	NP_000247.2:p.(Leu535GlyfsTer2)	PATHOGENIC	PVS1,PM2_supporting,PP5,PS4_supporting
14	23429279	G	A	14-23429279-G-A	MYH7	NM_000257.4	c.1207C>T_p.Arg403Trp	2	NSY	missense_variant	Ex13	NC_000014.9:g.23429279G>A	NC_000014.9(NM_000257.4):c.1207C>T	NP_000248.2:p.(Arg403Trp)	PATHOGENIC	PM2_supporting,PM5,PP3_moderate,PP5,PS3(PP->PS),PS4
14	23429038	G	A	14-23429038-G-A	MYH7	NM_000257.4	c.1324C>T_p.Arg442Cys	2	NSY	missense_variant	Ex14	NC_000014.9:g.23429038G>A	NC_000014.9(NM_000257.4):c.1324C>T	NP_000248.2:p.(Arg442Cys)	LIKELY_PATHOGENIC	PM2_supporting,PM5,PP3_moderate,PP5,PS4
14	23429037	C	T	14-23429037-C-T	MYH7	NM_000257.4	c.1325G>A_p.Arg442His	2	NSY	missense_variant	Ex14	NC_000014.9:g.23429037C>T	NC_000014.9(NM_000257.4):c.1325G>A	NP_000248.2:p.(Arg442His)	LIKELY_PATHOGENIC	PM2_supporting,PM5,PP3_moderate,PS4
14	23429005	G	A	14-23429005-G-A	MYH7	NM_000257.4	c.1357C>T_p.Arg453Cys	2	NSY	missense_variant	Ex14	NC_000014.9:g.23429005G>A	NC_000014.9(NM_000257.4):c.1357C>T	NP_000248.2:p.(Arg453Cys)	PATHOGENIC	PM2_supporting,PM5,PP3_moderate,PP5,PS3(PP->PS),PS4_moderate(BP->PS)
14	23428992	A	G	14-23428992-A-G	MYH7	NM_000257.4	c.1370T>C_p.Ile457Thr	2	NSY	missense_variant	Ex14	NC_000014.9:g.23428992A>G	NC_000014.9(NM_000257.4):c.1370T>C	NP_000248.2:p.(Ile457Thr)	LIKELY_PATHOGENIC	PM2_supporting,PP3_moderate,PP5,PS4
14	23428587	C	A	14-23428587-C-A	MYH7	NM_000257.4	c.1491G>T_p.Glu497Asp	2	NSY	missense_variant	Ex15	NC_000014.9:g.23428587C>A	NC_000014.9(NM_000257.4):c.1491G>T	NP_000248.2:p.(Glu497Asp)	LIKELY_PATHOGENIC	PM2_supporting,PP3_moderate,PP5,PS4
14	23427746	T	C	14-23427746-T-C	MYH7	NM_000257.4	c.1727A>G_p.His576Arg	2	NSY	missense_variant	Ex16	NC_000014.9:g.23427746T>C	NC_000014.9(NM_000257.4):c.1727A>G	NP_000248.2:p.(His576Arg)	LIKELY_PATHOGENIC	PM2_supporting,PP3_moderate,PP5,PS4
14	23427723	C	T	14-23427723-C-T	MYH7	NM_000257.4	c.1750G>A_p.Gly584Ser	2	NSY	missense_variant	Ex16	NC_000014.9:g.23427723C>T	NC_000014.9(NM_000257.4):c.1750G>A	NP_000248.2:p.(Gly584Ser)	LIKELY_PATHOGENIC	PM2_supporting,PM5,PP3_moderate,PP5,PS4
14	23427723	C	G	14-23427723-C-G	MYH7	NM_000257.4	c.1750G>C_p.Gly584Arg	2	NSY	missense_variant	Ex16	NC_000014.9:g.23427723C>G	NC_000014.9(NM_000257.4):c.1750G>C	NP_000248.2:p.(Gly584Arg)	LIKELY_PATHOGENIC	PM2_supporting,PM5,PP3_moderate,PP5,PS4
14	23426834	G	A	14-23426834-G-A	MYH7	NM_000257.4	c.1987C>T_p.Arg663Cys	2	NSY	missense_variant	Ex18	NC_000014.9:g.23426834G>A	NC_000014.9(NM_000257.4):c.1987C>T	NP_000248.2:p.(Arg663Cys)	PATHOGENIC	PM2_supporting,PM5,PP3_moderate,PP5,PS3_supporting(NA->PP),PS4
14	23426833	C	T	14-23426833-C-T	MYH7	NM_000257.4	c.1988G>A_p.Arg663His	2	NSY	missense_variant	Ex18	NC_000014.9:g.23426833C>T	NC_000014.9(NM_000257.4):c.1988G>A	NP_000248.2:p.(Arg663His)	LIKELY_PATHOGENIC	PM2_supporting,PM5,PP3,PP5,PS3_supporting(PP->PM),PS4
14	23426046	G	A	14-23426046-G-A	MYH7	NM_000257.4	c.2080C>T_p.Arg694Cys	2	NSY	missense_variant	Ex19	NC_000014.9:g.23426046G>A	NC_000014.9(NM_000257.4):c.2080C>T	NP_000248.2:p.(Arg694Cys)	LIKELY_PATHOGENIC	PM2_supporting,PM5,PP3_moderate,PP5,PS4
14	23425991	C	A	14-23425991-C-A	MYH7	NM_000257.4	c.2135G>T_p.Arg712Leu	2	NSY	missense_variant	Ex19	NC_000014.9:g.23425991C>A	NC_000014.9(NM_000257.4):c.2135G>T	NP_000248.2:p.(Arg712Leu)	LIKELY_PATHOGENIC	PM2_supporting,PM5,PP3_moderate,PS3_supporting(PP->PM),PS4_supporting
14	23425971	G	A	14-23425971-G-A	MYH7	NM_000257.4	c.2155C>T_p.Arg719Trp	2	NSY	missense_variant	Ex19	NC_000014.9:g.23425971G>A	NC_000014.9(NM_000257.4):c.2155C>T	NP_000248.2:p.(Arg719Trp)	PATHOGENIC	PM2_supporting,PM5,PP3_moderate,PP5,PS3_supporting(BP->PM),PS4
14	23425970	C	T	14-23425970-C-T	MYH7	NM_000257.4	c.2156G>A_p.Arg719Gln	2	NSY	missense_variant	Ex19	NC_000014.9:g.23425970C>T	NC_000014.9(NM_000257.4):c.2156G>A	NP_000248.2:p.(Arg719Gln)	PATHOGENIC	PM2_supporting,PM5,PP3,PP5,PS3_moderate(BP->PM),PS4
14	23425814	G	A	14-23425814-G-A	MYH7	NM_000257.4	c.2167C>T_p.Arg723Cys	2	NSY	missense_variant	Ex20	NC_000014.9:g.23425814G>A	NC_000014.9(NM_000257.4):c.2167C>T	NP_000248.2:p.(Arg723Cys)	PATHOGENIC	PM2_supporting,PM5,PP3,PP5,PS3(NA->PS),PS4
14	23425760	C	T	14-23425760-C-T	MYH7	NM_000257.4	c.2221G>A_p.Gly741Arg	2	NSY	missense_variant	Ex20	NC_000014.9:g.23425760C>T	NC_000014.9(NM_000257.4):c.2221G>A	NP_000248.2:p.(Gly741Arg)	PATHOGENIC	PS1,PM2_supporting,PM5,PP3_moderate,PP5,PS4
14	23425760	C	G	14-23425760-C-G	MYH7	NM_000257.4	c.2221G>C_p.Gly741Arg	2	NSY	missense_variant	Ex20	NC_000014.9:g.23425760C>G	NC_000014.9(NM_000257.4):c.2221G>C	NP_000248.2:p.(Gly741Arg)	PATHOGENIC	PS1,PM2_supporting,PM5,PP3_moderate,PP5,PS4
14	23425760	C	A	14-23425760-C-A	MYH7	NM_000257.4	c.2221G>T_p.Gly741Trp	2	NSY	missense_variant	Ex20	NC_000014.9:g.23425760C>A	NC_000014.9(NM_000257.4):c.2221G>T	NP_000248.2:p.(Gly741Trp)	LIKELY_PATHOGENIC	PM2_supporting,PM5,PP3_moderate,PP5,PS4_moderate(BP->PS)
14	23425403	C	T	14-23425403-C-T	MYH7	NM_000257.4	c.2302G>A_p.Gly768Arg	2	NSY	missense_variant	Ex21	NC_000014.9:g.23425403C>T	NC_000014.9(NM_000257.4):c.2302G>A	NP_000248.2:p.(Gly768Arg)	PATHOGENIC	PS1,PM2_supporting,PP3_moderate,PP5,PS4
14	23425316	C	T	14-23425316-C-T	MYH7	NM_000257.4	c.2389G>A_p.Ala797Thr	2	NSY	missense_variant	Ex21	NC_000014.9:g.23425316C>T	NC_000014.9(NM_000257.4):c.2389G>A	NP_000248.2:p.(Ala797Thr)	LIKELY_PATHOGENIC	PM2_supporting,PM5,PP5,PS3_NA(BP->PP),PS4
14	23424876	G	A	14-23424876-G-A	MYH7	NM_000257.4	c.2572C>T_p.Arg858Cys	2	NSY	missense_variant	Ex22	NC_000014.9:g.23424876G>A	NC_000014.9(NM_000257.4):c.2572C>T	NP_000248.2:p.(Arg858Cys)	LIKELY_PATHOGENIC	PM2_supporting,PM5,PP5,PS4
14	23424854	T	C	14-23424854-T-C	MYH7	NM_000257.4	c.2594A>G_p.Lys865Arg	2	NSY	missense_variant	Ex22	NC_000014.9:g.23424854T>C	NC_000014.9(NM_000257.4):c.2594A>G	NP_000248.2:p.(Lys865Arg)	LIKELY_PATHOGENIC	PM2_supporting,PM5,PP3,PP5,PS4_moderate
14	23424843	G	A	14-23424843-G-A	MYH7	NM_000257.4	c.2605C>T_p.Arg869Cys	2	NSY	missense_variant	Ex22	NC_000014.9:g.23424843G>A	NC_000014.9(NM_000257.4):c.2605C>T	NP_000248.2:p.(Arg869Cys)	LIKELY_PATHOGENIC	PM2_supporting,PM5,PP3,PP5,PS4_moderate
14	23424842	C	T	14-23424842-C-T	MYH7	NM_000257.4	c.2606G>A_p.Arg869His	2	NSY	missense_variant	Ex22	NC_000014.9:g.23424842C>T	NC_000014.9(NM_000257.4):c.2606G>A	NP_000248.2:p.(Arg869His)	LIKELY_PATHOGENIC	PM2_supporting,PM5,PP3,PP5,PS4_moderate(BP->PS)
14	23424840	G	A	14-23424840-G-A	MYH7	NM_000257.4	c.2608C>T_p.Arg870Cys	2	NSY	missense_variant	Ex22	NC_000014.9:g.23424840G>A	NC_000014.9(NM_000257.4):c.2608C>T	NP_000248.2:p.(Arg870Cys)	PATHOGENIC	PM2_supporting,PM5,PP3_moderate,PP5,PS3_supporting(NA->PP),PS4
14	23424839	C	T	14-23424839-C-T	MYH7	NM_000257.4	c.2609G>A_p.Arg870His	2	NSY	missense_variant	Ex22	NC_000014.9:g.23424839C>T	NC_000014.9(NM_000257.4):c.2609G>A	NP_000248.2:p.(Arg870His)	PATHOGENIC	PM2_supporting,PM5,PP3_moderate,PP5,PS3_supporting(PP->PM),PS4
14	23424817	C	T	14-23424817-C-T	MYH7	NM_000257.4	c.2631G>A_p.Met877Ile	2	NSY	missense_variant	Ex22	NC_000014.9:g.23424817C>T	NC_000014.9(NM_000257.4):c.2631G>A	NP_000248.2:p.(Met877Ile)	LIKELY_PATHOGENIC	PS1,PM2_supporting,PM5,PP5,PS4_supporting
14	23424119	G	A	14-23424119-G-A	MYH7	NM_000257.4	c.2710C>T_p.Arg904Cys	2	NSY	missense_variant	Ex23	NC_000014.9:g.23424119G>A	NC_000014.9(NM_000257.4):c.2710C>T	NP_000248.2:p.(Arg904Cys)	LIKELY_PATHOGENIC	PM2_supporting,PM5,PP3,PP5,PS4
14	23424112	T	C	14-23424112-T-C	MYH7	NM_000257.4	c.2717A>G_p.Asp906Gly	2	NSY	missense_variant	Ex23	NC_000014.9:g.23424112T>C	NC_000014.9(NM_000257.4):c.2717A>G	NP_000248.2:p.(Asp906Gly)	LIKELY_PATHOGENIC	PM2_supporting,PP3_moderate,PP5,PS4
14	23424107	G	C	14-23424107-G-C	MYH7	NM_000257.4	c.2722C>G_p.Leu908Val	2	NSY	missense_variant	Ex23	NC_000014.9:g.23424107G>C	NC_000014.9(NM_000257.4):c.2722C>G	NP_000248.2:p.(Leu908Val)	LIKELY_PATHOGENIC	PM2_supporting,PP3_moderate,PP5,PS3_NA(BP->PP),PS4
14	23424059	C	T	14-23424059-C-T	MYH7	NM_000257.4	c.2770G>A_p.Glu924Lys	2	NSY	missense_variant	Ex23	NC_000014.9:g.23424059C>T	NC_000014.9(NM_000257.4):c.2770G>A	NP_000248.2:p.(Glu924Lys)	PATHOGENIC	PM2_supporting,PM5,PP3_moderate,PP5,PS3_supporting(PP->PM),PS4
14	23422292	G	A	14-23422292-G-A	MYH7	NM_000257.4	c.3133C>T_p.Arg1045Cys	2	NSY	missense_variant	Ex25	NC_000014.9:g.23422292G>A	NC_000014.9(NM_000257.4):c.3133C>T	NP_000248.2:p.(Arg1045Cys)	LIKELY_PATHOGENIC	PM2_supporting,PM5,PP3_moderate,PS4
14	23422291	C	T	14-23422291-C-T	MYH7	NM_000257.4	c.3134G>A_p.Arg1045His	2	NSY	missense_variant	Ex25	NC_000014.9:g.23422291C>T	NC_000014.9(NM_000257.4):c.3134G>A	NP_000248.2:p.(Arg1045His)	LIKELY_PATHOGENIC	PM2_supporting,PM5,PP3_moderate,PS4_moderate(BP->PS)
14	23422291	C	A	14-23422291-C-A	MYH7	NM_000257.4	c.3134G>T_p.Arg1045Leu	2	NSY	missense_variant	Ex25	NC_000014.9:g.23422291C>A	NC_000014.9(NM_000257.4):c.3134G>T	NP_000248.2:p.(Arg1045Leu)	LIKELY_PATHOGENIC	PM2_supporting,PP3_moderate,PP5,PS4
14	23422268	G	A	14-23422268-G-A	MYH7	NM_000257.4	c.3157C>T_p.Arg1053Trp	2	NSY	missense_variant	Ex25	NC_000014.9:g.23422268G>A	NC_000014.9(NM_000257.4):c.3157C>T	NP_000248.2:p.(Arg1053Trp)	LIKELY_PATHOGENIC	PM2_supporting,PM5,PP3_moderate,PS4_moderate
14	23422267	C	T	14-23422267-C-T	MYH7	NM_000257.4	c.3158G>A_p.Arg1053Gln	2	NSY	missense_variant	Ex25	NC_000014.9:g.23422267C>T	NC_000014.9(NM_000257.4):c.3158G>A	NP_000248.2:p.(Arg1053Gln)	LIKELY_PATHOGENIC	PP3_moderate,PP5,PS4
14	23422256	C	T	14-23422256-C-T	MYH7	NM_000257.4	c.3169G>A_p.Gly1057Ser	2	NSY	missense_variant	Ex25	NC_000014.9:g.23422256C>T	NC_000014.9(NM_000257.4):c.3169G>A	NP_000248.2:p.(Gly1057Ser)	LIKELY_PATHOGENIC	PM2_supporting,PP3_moderate,PP5,PS4
14	23418249	G	A	14-23418249-G-A	MYH7	NM_000257.4	c.4130C>T_p.Thr1377Met	2	NSY	missense_variant	Ex30	NC_000014.9:g.23418249G>A	NC_000014.9(NM_000257.4):c.4130C>T	NP_000248.2:p.(Thr1377Met)	LIKELY_PATHOGENIC	PM2_supporting,PP3_moderate,PP5,PS3_NA(BP->PP),PS4
14	23418244	C	T	14-23418244-C-T	MYH7	NM_000257.4	c.4135G>A_p.Ala1379Thr	2	NSY	missense_variant	Ex30	NC_000014.9:g.23418244C>T	NC_000014.9(NM_000257.4):c.4135G>A	NP_000248.2:p.(Ala1379Thr)	LIKELY_PATHOGENIC	PM2_supporting,PM5,PP3_moderate,PP5,PS4
14	23418234	C	T	14-23418234-C-T	MYH7	NM_000257.4	c.4145G>A_p.Arg1382Gln	2	NSY	missense_variant	Ex30	NC_000014.9:g.23418234C>T	NC_000014.9(NM_000257.4):c.4145G>A	NP_000248.2:p.(Arg1382Gln)	LIKELY_PATHOGENIC	PM2_supporting,PP3_moderate,PS4
14	23417598	G	A	14-23417598-G-A	MYH7	NM_000257.4	c.4258C>T_p.Arg1420Trp	2	NSY	missense_variant	Ex31	NC_000014.9:g.23417598G>A	NC_000014.9(NM_000257.4):c.4258C>T	NP_000248.2:p.(Arg1420Trp)	LIKELY_PATHOGENIC	PM2_supporting,PP3_moderate,PP5,PS4
14	23417597	C	T	14-23417597-C-T	MYH7	NM_000257.4	c.4259G>A_p.Arg1420Gln	2	NSY	missense_variant	Ex31	NC_000014.9:g.23417597C>T	NC_000014.9(NM_000257.4):c.4259G>A	NP_000248.2:p.(Arg1420Gln)	LIKELY_PATHOGENIC	PM2_supporting,PM5,PP3_moderate,PP5,PS4
14	23432714	G	A	14-23432714-G-A	MYH7	NM_000257.4	c.427C>T_p.Arg143Trp	2	NSY	missense_variant	Ex5	NC_000014.9:g.23432714G>A	NC_000014.9(NM_000257.4):c.427C>T	NP_000248.2:p.(Arg143Trp)	LIKELY_PATHOGENIC	PM2_supporting,PM5,PP3_moderate,PP5,PS4_moderate(BP->PS)
14	23432713	C	T	14-23432713-C-T	MYH7	NM_000257.4	c.428G>A_p.Arg143Gln	2	NSY	missense_variant	Ex5	NC_000014.9:g.23432713C>T	NC_000014.9(NM_000257.4):c.428G>A	NP_000248.2:p.(Arg143Gln)	LIKELY_PATHOGENIC	PM2_supporting,PM5,PP3_moderate,PP5,PS4_moderate(BP->PS)
14	23417556	G	A	14-23417556-G-A	MYH7	NM_000257.4	c.4300C>T_p.Arg1434Cys	2	NSY	missense_variant	Ex31	NC_000014.9:g.23417556G>A	NC_000014.9(NM_000257.4):c.4300C>T	NP_000248.2:p.(Arg1434Cys)	LIKELY_PATHOGENIC	PM2_supporting,PM5,PP3_moderate,PS4
14	23417185	T	G	14-23417185-T-G	MYH7	NM_000257.4	c.4487A>C_p.Glu1496Ala	2	NSY	missense_variant	Ex32	NC_000014.9:g.23417185T>G	NC_000014.9(NM_000257.4):c.4487A>C	NP_000248.2:p.(Glu1496Ala)	LIKELY_PATHOGENIC	PM2_supporting,PM5,PP3_moderate,PS4_moderate
14	23417174	G	A	14-23417174-G-A	MYH7	NM_000257.4	c.4498C>T_p.Arg1500Trp	2	NSY	missense_variant	Ex32	NC_000014.9:g.23417174G>A	NC_000014.9(NM_000257.4):c.4498C>T	NP_000248.2:p.(Arg1500Trp)	LIKELY_PATHOGENIC	PM2_supporting,PM5,PP3_moderate,PP5,PS3_NA(BP->PP),PS4
14	23416134	C	T	14-23416134-C-T	MYH7	NM_000257.4	c.4823G>A_p.Arg1608His	2	NSY	missense_variant	Ex34	NC_000014.9:g.23416134C>T	NC_000014.9(NM_000257.4):c.4823G>A	NP_000248.2:p.(Arg1608His)	LIKELY_PATHOGENIC	PM2_supporting,PM5,PP3_moderate,PS4_supporting
14	23415652	G	A	14-23415652-G-A	MYH7	NM_000257.4	c.5134C>T_p.Arg1712Trp	2	NSY	missense_variant	Ex35	NC_000014.9:g.23415652G>A	NC_000014.9(NM_000257.4):c.5134C>T	NP_000248.2:p.(Arg1712Trp)	PATHOGENIC	PM2_supporting,PM5,PP3_moderate,PP5,PS3_supporting(PP->PM),PS4
14	23415651	C	T	14-23415651-C-T	MYH7	NM_000257.4	c.5135G>A_p.Arg1712Gln	2	NSY	missense_variant	Ex35	NC_000014.9:g.23415651C>T	NC_000014.9(NM_000257.4):c.5135G>A	NP_000248.2:p.(Arg1712Gln)	LIKELY_PATHOGENIC	PM2_supporting,PM5,PP5,PS3_supporting(NA->PP),PS4
14	23415385	G	T	14-23415385-G-T	MYH7	NM_000257.4	c.5279C>A_p.Thr1760Lys	2	NSY	missense_variant	Ex36	NC_000014.9:g.23415385G>T	NC_000014.9(NM_000257.4):c.5279C>A	NP_000248.2:p.(Thr1760Lys)	LIKELY_PATHOGENIC	PM2_supporting,PM5,PP3_moderate,PS4_supporting
14	23413776	G	A	14-23413776-G-A	MYH7	NM_000257.4	c.5773C>T_p.Arg1925Cys	2	NSY	missense_variant	Ex39	NC_000014.9:g.23413776G>A	NC_000014.9(NM_000257.4):c.5773C>T	NP_000248.2:p.(Arg1925Cys)	LIKELY_PATHOGENIC	PM2_supporting,PM5,PP3_moderate,PS4_supporting
14	23424148	T	C	14-23424148-T-C	MYH7	NM_000257.4	c.2681A>G_p.Glu894Gly	2	EE	splice_region_variant|missense_variant	Ex23	NC_000014.9:g.23424148T>C	NC_000014.9(NM_000257.4):c.2681A>G	NP_000248.2:p.(Glu894Gly)	LIKELY_PATHOGENIC	PM2_supporting,PP3_moderate,PP5,PS4	P
14	23431789	C	T	14-23431789-C-T	MYH7	NM_000257.4	c.611G>A_p.Arg204His	2	NSY	missense_variant	Ex7	NC_000014.9:g.23431789C>T	NC_000014.9(NM_000257.4):c.611G>A	NP_000248.2:p.(Arg204His)	LIKELY_PATHOGENIC	PM2_supporting,PP3,PS4
14	23431602	C	T	14-23431602-C-T	MYH7	NM_000257.4	c.715G>A_p.Asp239Asn	2	NSY	missense_variant	Ex8	NC_000014.9:g.23431602C>T	NC_000014.9(NM_000257.4):c.715G>A	NP_000248.2:p.(Asp239Asn)	LIKELY_PATHOGENIC	PM2_supporting,PP3,PP5,PS3_supporting(PP->PM),PS4
14	23431590	G	A	14-23431590-G-A	MYH7	NM_000257.4	c.727C>T_p.Arg243Cys	2	NSY	missense_variant	Ex8	NC_000014.9:g.23431590G>A	NC_000014.9(NM_000257.4):c.727C>T	NP_000248.2:p.(Arg243Cys)	LIKELY_PATHOGENIC	PM2_supporting,PP3_moderate,PS4
14	23430601	C	T	14-23430601-C-T	MYH7	NM_000257.4	c.958G>A_p.Val320Met	2	NSY	missense_variant	Ex11	NC_000014.9:g.23430601C>T	NC_000014.9(NM_000257.4):c.958G>A	NP_000248.2:p.(Val320Met)	LIKELY_PATHOGENIC	PM2_supporting,PM5,PP3_moderate,PS4
12	110914287	C	T	12-110914287-C-T	MYL2	NM_000432.4	c.173G>A_p.Arg58Gln	2	NSY	missense_variant	Ex4	NC_000012.12:g.110914287C>T	NC_000012.12(NM_000432.4):c.173G>A	NP_000423.2:p.(Arg58Gln)	LIKELY_PATHOGENIC	PM2_supporting,PM5,PP5,PS3_supporting(PP->PM),PS4
12	110919144	A	G	12-110919144-A-G	MYL2	NM_000432.4	c.53T>C_p.Phe18Ser	2	NSY	missense_variant	Ex2	NC_000012.12:g.110919144A>G	NC_000012.12(NM_000432.4):c.53T>C	NP_000423.2:p.(Phe18Ser)	LIKELY_PATHOGENIC	PM2_supporting,PM5,PP3_moderate,PS3_supporting(NA->PP),PS4_supporting
3	46859529	C	T	3-46859529-C-T	MYL3	NM_000258.3	c.427G>A_p.Glu143Lys	2	NSY	missense_variant	Ex4	NC_000003.12:g.46859529C>T	NC_000003.12(NM_000258.3):c.427G>A	NP_000249.1:p.(Glu143Lys)	LIKELY_PATHOGENIC	PM2_supporting,PP3_moderate,PS3_supporting(PP->PM),PS4
12	32796212	AG	A	12-32796212-AG-A	PKP2	NM_001005242.3	c.2253del_p.Cys752ValfsTer4	1	FS	frameshift_variant	Ex11	NC_000012.12:g.32796213del	NC_000012.12(NM_001005242.3):c.2253del	NP_001005242.2:p.(Cys752ValfsTer4)	LIKELY_PATHOGENIC	PVS1,PM2_supporting,PP5
12	32821487	TG	T	12-32821487-TG-T	PKP2	NM_001005242.3	c.1881del_p.Lys628ArgfsTer12	1	FS	frameshift_variant	Ex9	NC_000012.12:g.32821488del	NC_000012.12(NM_001005242.3):c.1881del	NP_001005242.2:p.(Lys628ArgfsTer12)	PATHOGENIC	PVS1,PM2_supporting,PP5,PS3_supporting(PP->PM),PS4_moderate(BP->PS)
12	32878041	ACG	A	12-32878041-ACG-A	PKP2	NM_001005242.3	c.837_838del_p.Val280HisfsTer55	1	FS	frameshift_variant	Ex3	NC_000012.12:g.32878042_32878043del	NC_000012.12(NM_001005242.3):c.837_838del	NP_001005242.2:p.(Val280HisfsTer55)	PATHOGENIC	PVS1,PM2_supporting,PP5,PS4_moderate
12	32878346	C	CA	12-32878346-C-CA	PKP2	NM_001005242.3	c.533dup_p.His179AlafsTer37	1	FS	frameshift_variant	Ex3	NC_000012.12:g.32878346_32878347insA	NC_000012.12(NM_001005242.3):c.533dup	NP_001005242.2:p.(His179AlafsTer37)	PATHOGENIC	PVS1,PM2_supporting,PP5,PS4_moderate
12	32802499	GGGTGT	G	12-32802499-GGGTGT-G	PKP2	NM_001005242.3	c.2066_2070del_p.His689ProfsTer8	1	FS	frameshift_variant	Ex10	NC_000012.12:g.32802500_32802504del	NC_000012.12(NM_001005242.3):c.2066_2070del	NP_001005242.2:p.(His689ProfsTer8)	PATHOGENIC	PVS1,PM2_supporting,PP5,PS4_moderate(BP->PS)
12	32878999	TACTC	T	12-32878999-TACTC-T	PKP2	NM_001005242.3	c.253_256del_p.Glu85MetfsTer26	1	FS	frameshift_variant	Ex2	NC_000012.12:g.32879000_32879003del	NC_000012.12(NM_001005242.3):c.253_256del	NP_001005242.2:p.(Glu85MetfsTer26)	PATHOGENIC	PVS1,PM2_supporting,PP5,PS4_moderate(BP->PS)
12	32896541	A	AG	12-32896541-A-AG	PKP2	NM_001005242.3	c.190dup_p.Leu64ProfsTer22	1	FS	frameshift_variant	Ex1	NC_000012.12:g.32896541_32896542insG	NC_000012.12(NM_001005242.3):c.190dup	NP_001005242.2:p.(Leu64ProfsTer22)	PATHOGENIC	PVS1,PM2_supporting,PP5,PS4_supporting
12	32877892	CA	C	12-32877892-CA-C	PKP2	NM_001005242.3	c.987del_p.Ser329ArgfsTer23	1	FS	frameshift_variant	Ex3	NC_000012.12:g.32877893del	NC_000012.12(NM_001005242.3):c.987del	NP_001005242.2:p.(Ser329ArgfsTer23)	PATHOGENIC	PVS1,PM2_supporting,PP5,PS4_supporting
12	32822616	C	CA	12-32822616-C-CA	PKP2	NM_001005242.3	c.1689dup_p.Val564CysfsTer6	1	FS	frameshift_variant	Ex8	NC_000012.12:g.32822616_32822617insA	NC_000012.12(NM_001005242.3):c.1689dup	NP_001005242.2:p.(Val564CysfsTer6)	PATHOGENIC	PVS1,PM2_supporting,PP5,PS4_supporting(BP->PM)
12	32877908	C	CAG	12-32877908-C-CAG	PKP2	NM_001005242.3	c.971_972insCT_p.Ala325TrpfsTer28	1	FS	frameshift_variant	Ex3	NC_000012.12:g.32877908_32877909insAG	NC_000012.12(NM_001005242.3):c.971_972insCT	NP_001005242.2:p.(Ala325TrpfsTer28)	PATHOGENIC	PVS1,PM2_supporting,PS4_supporting
12	32822588	T	TTACC	12-32822588-T-TTACC	PKP2	NM_001005242.3	c.1717_1718ins1714_1717inv_p.Gln573ArgfsTer2	1	FS	frameshift_variant	Ex8	NC_000012.12:g.32822588_32822589insTACC	NC_000012.12(NM_001005242.3):c.1717_1718ins1714_1717inv	NP_001005242.2:p.(Gln573ArgfsTer2)	LIKELY_PATHOGENIC	PVS1,PM2_supporting
12	32841165	A	AG	12-32841165-A-AG	PKP2	NM_001005242.3	c.1418_1419insC_p.Leu474SerfsTer23	1	FS	frameshift_variant	Ex6	NC_000012.12:g.32841165_32841166insG	NC_000012.12(NM_001005242.3):c.1418_1419insC	NP_001005242.2:p.(Leu474SerfsTer23)	LIKELY_PATHOGENIC	PVS1,PM2_supporting
12	32878267	CA	C	12-32878267-CA-C	PKP2	NM_001005242.3	c.612del_p.Ala205LeufsTer58	1	FS	frameshift_variant	Ex3	NC_000012.12:g.32878268del	NC_000012.12(NM_001005242.3):c.612del	NP_001005242.2:p.(Ala205LeufsTer58)	LIKELY_PATHOGENIC	PVS1,PM2_supporting
12	32878143	GGCCT	G	12-32878143-GGCCT-G	PKP2	NM_001005242.3	c.733_736del_p.Arg245GlnfsTer17	1	FS	frameshift_variant	Ex3	NC_000012.12:g.32878144_32878147del	NC_000012.12(NM_001005242.3):c.733_736del	NP_001005242.2:p.(Arg245GlnfsTer17)	LIKELY_PATHOGENIC	PVS1,PM2_supporting
12	32796259	T	TA	12-32796259-T-TA	PKP2	NM_001005242.3	c.2206_2207insT_p.Asp736ValfsTer7	1	FS	frameshift_variant	Ex11	NC_000012.12:g.32796259_32796260insA	NC_000012.12(NM_001005242.3):c.2206_2207insT	NP_001005242.2:p.(Asp736ValfsTer7)	LIKELY_PATHOGENIC	PVS1,PM2_supporting
12	32877907	CCGCCT	C	12-32877907-CCGCCT-C	PKP2	NM_001005242.3	c.968_972del_p.Gln323ArgfsTer11	1	FS	frameshift_variant	Ex3	NC_000012.12:g.32877908_32877912del	NC_000012.12(NM_001005242.3):c.968_972del	NP_001005242.2:p.(Gln323ArgfsTer11)	LIKELY_PATHOGENIC	PVS1,PM2_supporting
12	32896583	GTC	G	12-32896583-GTC-G	PKP2	NM_001005242.3	c.147_148del_p.Gln49HisfsTer36	1	FS	frameshift_variant	Ex1	NC_000012.12:g.32896584_32896585del	NC_000012.12(NM_001005242.3):c.147_148del	NP_001005242.2:p.(Gln49HisfsTer36)	LIKELY_PATHOGENIC	PVS1,PM2_supporting
12	32821514	GC	G	12-32821514-GC-G	PKP2	NM_001005242.3	c.1854del_p.Pro619ArgfsTer21	1	FS	frameshift_variant	Ex9	NC_000012.12:g.32821515del	NC_000012.12(NM_001005242.3):c.1854del	NP_001005242.2:p.(Pro619ArgfsTer21)	LIKELY_PATHOGENIC	PVS1,PM2_supporting
12	32869043	T	TCATC	12-32869043-T-TCATC	PKP2	NM_001005242.3	c.1050_1053dup_p.Thr352AspfsTer36	1	FS	frameshift_variant	Ex4	NC_000012.12:g.32869043_32869044insCATC	NC_000012.12(NM_001005242.3):c.1050_1053dup	NP_001005242.2:p.(Thr352AspfsTer36)	LIKELY_PATHOGENIC	PVS1,PM2_supporting
12	32841163	A	AGGTTCTT	12-32841163-A-AGGTTCTT	PKP2	NM_001005242.3	c.1420_1421insAAGAACC_p.Leu474GlnfsTer25	1	FS	frameshift_variant	Ex6	NC_000012.12:g.32841163_32841164insGGTTCTT	NC_000012.12(NM_001005242.3):c.1420_1421insAAGAACC	NP_001005242.2:p.(Leu474GlnfsTer25)	LIKELY_PATHOGENIC	PVS1,PM2_supporting
12	32878283	GATCTCGGAACGAGCAT	G	12-32878283-GATCTCGGAACGAGCAT-G	PKP2	NM_001005242.3	c.581_596del_p.Tyr194SerfsTer64	1	FS	frameshift_variant	Ex3	NC_000012.12:g.32878284_32878299del	NC_000012.12(NM_001005242.3):c.581_596del	NP_001005242.2:p.(Tyr194SerfsTer64)	LIKELY_PATHOGENIC	PVS1,PM2_supporting
12	32802499	G	A	12-32802499-G-A	PKP2	NM_001005242.3	c.2071C>T_p.Arg691Ter	1	SG	stop_gained	Ex10	NC_000012.12:g.32802499G>A	NC_000012.12(NM_001005242.3):c.2071C>T	NP_001005242.2:p.(Arg691Ter)	PATHOGENIC	PVS1,PM2_supporting,PP5,PS3_supporting(PP->PM),PS4
12	32877845	C	T	12-32877845-C-T	PKP2	NM_001005242.3	c.1034+1G>A_p.?	1	ESS	splice_donor_variant	In3/4	NC_000012.12:g.32877845C>T	NC_000012.12(NM_001005242.3):c.1034+1G>A	NP_001005242.2:p.(?)	LIKELY_PATHOGENIC	PVS1,PM2_supporting,PP5,PS4_NA(BP->PP)
12	32879021	G	A	12-32879021-G-A	PKP2	NM_001005242.3	c.235C>T_p.Arg79Ter	1	SG	stop_gained	Ex2	NC_000012.12:g.32879021G>A	NC_000012.12(NM_001005242.3):c.235C>T	NP_001005242.2:p.(Arg79Ter)	PATHOGENIC	PVS1,PM2_supporting,PP5,PS3_supporting(PP->PM),PS4_moderate(BP->PS)
12	32821400	CT	C	12-32821400-CT-C	PKP2	NM_001005242.3	c.1968del_p.Ala657HisfsTer3	1	FS	frameshift_variant	Ex9	NC_000012.12:g.32821401del	NC_000012.12(NM_001005242.3):c.1968del	NP_001005242.2:p.(Ala657HisfsTer3)	LIKELY_PATHOGENIC	PVS1,PM2_supporting,PP5
12	32822526	G	A	12-32822526-G-A	PKP2	NM_001005242.3	c.1780C>T_p.Gln594Ter	1	SG	stop_gained	Ex8	NC_000012.12:g.32822526G>A	NC_000012.12(NM_001005242.3):c.1780C>T	NP_001005242.2:p.(Gln594Ter)	PATHOGENIC	PVS1,PM2_supporting,PP5,PS4
12	32822487	G	A	12-32822487-G-A	PKP2	NM_001005242.3	c.1819C>T_p.Arg607Ter	1	SG	stop_gained	Ex8	NC_000012.12:g.32822487G>A	NC_000012.12(NM_001005242.3):c.1819C>T	NP_001005242.2:p.(Arg607Ter)	PATHOGENIC	PVS1,PM2_supporting,PP5,PS4
12	32877845	C	G	12-32877845-C-G	PKP2	NM_001005242.3	c.1034+1G>C_p.?	1	ESS	splice_donor_variant	In3/4	NC_000012.12:g.32877845C>G	NC_000012.12(NM_001005242.3):c.1034+1G>C	NP_001005242.2:p.(?)	LIKELY_PATHOGENIC	PVS1,PM2_supporting,PP5
12	32850781	TA	T	12-32850781-TA-T	PKP2	NM_001005242.3	c.1362del_p.Lys456AsnfsTer3	1	FS	frameshift_variant	Ex5	NC_000012.12:g.32850782del	NC_000012.12(NM_001005242.3):c.1362del	NP_001005242.2:p.(Lys456AsnfsTer3)	LIKELY_PATHOGENIC	PVS1,PM2_supporting,PP5
12	32878068	A	ACCTGCCCGACAGTGAGC	12-32878068-A-ACCTGCCCGACAGTGAGC	PKP2	NM_001005242.3	c.795_811dup_p.Val271GlyfsTer37	1	FS	frameshift_variant	Ex3	NC_000012.12:g.32878068_32878069insCCTGCCCGACAGTGAGC	NC_000012.12(NM_001005242.3):c.795_811dup	NP_001005242.2:p.(Val271GlyfsTer37)	LIKELY_PATHOGENIC	PVS1,PM2_supporting,PP5
12	32841103	C	T	12-32841103-C-T	PKP2	NM_001005242.3	c.1481G>A_p.Trp494Ter	1	SG	stop_gained	Ex6	NC_000012.12:g.32841103C>T	NC_000012.12(NM_001005242.3):c.1481G>A	NP_001005242.2:p.(Trp494Ter)	PATHOGENIC	PVS1,PM2_supporting,PP5,PS4_moderate(BP->PS)
12	32869064	T	C	12-32869064-T-C	PKP2	NM_001005242.3	c.1035-2A>G_p.?	1	ESS	splice_acceptor_variant	In3/4	NC_000012.12:g.32869064T>C	NC_000012.12(NM_001005242.3):c.1035-2A>G	NP_001005242.2:p.(?)	LIKELY_PATHOGENIC	PVS1,PM2_supporting,PP5
12	32878217	G	T	12-32878217-G-T	PKP2	NM_001005242.3	c.663C>A_p.Tyr221Ter	1	SG	stop_gained	Ex3	NC_000012.12:g.32878217G>T	NC_000012.12(NM_001005242.3):c.663C>A	NP_001005242.2:p.(Tyr221Ter)	PATHOGENIC	PVS1,PM2_supporting,PP5,PS4_moderate(BP->PS)
12	32877887	ATTCCCAC	A	12-32877887-ATTCCCAC-A	PKP2	NM_001005242.3	c.986_992del_p.Ser329IlefsTer21	1	FS	frameshift_variant	Ex3	NC_000012.12:g.32877888_32877894del	NC_000012.12(NM_001005242.3):c.986_992del	NP_001005242.2:p.(Ser329IlefsTer21)	LIKELY_PATHOGENIC	PVS1,PM2_supporting,PP5,PS4_NA(BP->PP)
12	32850975	T	C	12-32850975-T-C	PKP2	NM_001005242.3	c.1171-2A>G_p.?	1	ESS	splice_acceptor_variant	In4/5	NC_000012.12:g.32850975T>C	NC_000012.12(NM_001005242.3):c.1171-2A>G	NP_001005242.2:p.(?)	PATHOGENIC	PVS1,PM2_supporting,PP5,PS4_moderate
12	32822482	G	GCTTC	12-32822482-G-GCTTC	PKP2	NM_001005242.3	c.1820_1823dup_p.Ser608ArgfsTer92	1	FS	frameshift_variant	Ex8	NC_000012.12:g.32822482_32822483insCTTC	NC_000012.12(NM_001005242.3):c.1820_1823dup	NP_001005242.2:p.(Ser608ArgfsTer92)	PATHOGENIC	PVS1,PM2_supporting,PP5,PS4_moderate
12	32878981	A	T	12-32878981-A-T	PKP2	NM_001005242.3	c.275T>A_p.Leu92Ter	1	SG	stop_gained	Ex2	NC_000012.12:g.32878981A>T	NC_000012.12(NM_001005242.3):c.275T>A	NP_001005242.2:p.(Leu92Ter)	PATHOGENIC	PVS1,PM2_supporting,PP5,PS4_moderate(BP->PS)
12	32868965	G	A	12-32868965-G-A	PKP2	NM_001005242.3	c.1132C>T_p.Gln378Ter	1	SG	stop_gained	Ex4	NC_000012.12:g.32868965G>A	NC_000012.12(NM_001005242.3):c.1132C>T	NP_001005242.2:p.(Gln378Ter)	PATHOGENIC	PVS1,PM2_supporting,PP5,PS4_moderate(BP->PS)
12	32850765	C	G	12-32850765-C-G	PKP2	NM_001005242.3	c.1378+1G>C_p.?	1	ESS	splice_donor_variant	In5/6	NC_000012.12:g.32850765C>G	NC_000012.12(NM_001005242.3):c.1378+1G>C	NP_001005242.2:p.(?)	PATHOGENIC	PVS1,PM2_supporting,PP5,PS4_moderate(PM->PS)
12	32841207	T	C	12-32841207-T-C	PKP2	NM_001005242.3	c.1379-2A>G_p.?	1	ESS	splice_acceptor_variant	In5/6	NC_000012.12:g.32841207T>C	NC_000012.12(NM_001005242.3):c.1379-2A>G	NP_001005242.2:p.(?)	PATHOGENIC	PVS1,PM2_supporting,PP5,PS4_moderate
12	32878490	G	C	12-32878490-G-C	PKP2	NM_001005242.3	c.390C>G_p.Tyr130Ter	1	SG	stop_gained	Ex3	NC_000012.12:g.32878490G>C	NC_000012.12(NM_001005242.3):c.390C>G	NP_001005242.2:p.(Tyr130Ter)	PATHOGENIC	PVS1,PM2_supporting,PP5,PS4_supporting
12	32896580	ACTGT	A	12-32896580-ACTGT-A	PKP2	NM_001005242.3	c.148_151del_p.Thr50SerfsTer61	1	FS	frameshift_variant	Ex1	NC_000012.12:g.32896581_32896584del	NC_000012.12(NM_001005242.3):c.148_151del	NP_001005242.2:p.(Thr50SerfsTer61)	PATHOGENIC	PVS1,PM2_supporting,PP5,PS4_moderate(BP->PS)
12	32841072	AC	A	12-32841072-AC-A	PKP2	NM_001005242.3	c.1511del_p.Gly504ValfsTer15	1	FS	frameshift_variant	Ex6	NC_000012.12:g.32841073del	NC_000012.12(NM_001005242.3):c.1511del	NP_001005242.2:p.(Gly504ValfsTer15)	PATHOGENIC	PVS1,PM2_supporting,PP5,PS4_moderate(BP->PS)
12	32878256	TG	T	12-32878256-TG-T	PKP2	NM_001005242.3	c.623del_p.Thr208LysfsTer55	1	FS	frameshift_variant	Ex3	NC_000012.12:g.32878257del	NC_000012.12(NM_001005242.3):c.623del	NP_001005242.2:p.(Thr208LysfsTer55)	PATHOGENIC	PVS1,PM2_supporting,PP5,PS4_supporting
12	32869034	G	A	12-32869034-G-A	PKP2	NM_001005242.3	c.1063C>T_p.Arg355Ter	1	SG	stop_gained	Ex4	NC_000012.12:g.32869034G>A	NC_000012.12(NM_001005242.3):c.1063C>T	NP_001005242.2:p.(Arg355Ter)	PATHOGENIC	PVS1,PM2_supporting,PP5,PS4_supporting(BP->PM)
12	32850907	G	A	12-32850907-G-A	PKP2	NM_001005242.3	c.1237C>T_p.Arg413Ter	1	SG	stop_gained	Ex5	NC_000012.12:g.32850907G>A	NC_000012.12(NM_001005242.3):c.1237C>T	NP_001005242.2:p.(Arg413Ter)	PATHOGENIC	PVS1,PM2_supporting,PP5,PS4_supporting(BP->PS)
12	32896566	TCCGCAGGCTCTTGACTGTCTGG	T	12-32896566-TCCGCAGGCTCTTGACTGTCTGG-T	PKP2	NM_001005242.3	c.144_165del_p.Gln49SerfsTer56	1	FS	frameshift_variant	Ex1	NC_000012.12:g.32896567_32896588del	NC_000012.12(NM_001005242.3):c.144_165del	NP_001005242.2:p.(Gln49SerfsTer56)	PATHOGENIC	PVS1,PM2_supporting,PP5,PS4_supporting
12	32868919	ACACT	A	12-32868919-ACACT-A	PKP2	NM_001005242.3	c.1170+4_1170+7del_p.?	2	SS5	splice_donor_5th_base_variant	In4/5	NC_000012.12:g.32868920_32868923del	NC_000012.12(NM_001005242.3):c.1170+4_1170+7del	NP_001005242.2:p.(?)	LIKELY_PATHOGENIC	PVS1_strong,PM2_supporting,PS4_supporting
12	32796230	C	A	12-32796230-C-A	PKP2	NM_001005242.3	c.2236G>T_p.Glu746Ter	1	SG	stop_gained	Ex11	NC_000012.12:g.32796230C>A	NC_000012.12(NM_001005242.3):c.2236G>T	NP_001005242.2:p.(Glu746Ter)	LIKELY_PATHOGENIC	PVS1,PM2_supporting
12	32878224	CTG	C	12-32878224-CTG-C	PKP2	NM_001005242.3	c.654_655del_p.His218GlnfsTer9	1	FS	frameshift_variant	Ex3	NC_000012.12:g.32878225_32878226del	NC_000012.12(NM_001005242.3):c.654_655del	NP_001005242.2:p.(His218GlnfsTer9)	PATHOGENIC	PVS1,PM2_supporting,PP5,PS4_supporting
12	32822534	CG	C	12-32822534-CG-C	PKP2	NM_001005242.3	c.1771del_p.Arg591GlyfsTer21	1	FS	frameshift_variant	Ex8	NC_000012.12:g.32822535del	NC_000012.12(NM_001005242.3):c.1771del	NP_001005242.2:p.(Arg591GlyfsTer21)	PATHOGENIC	PVS1,PM2_supporting,PP5,PS4_supporting
12	32850814	G	A	12-32850814-G-A	PKP2	NM_001005242.3	c.1330C>T_p.Gln444Ter	1	SG	stop_gained	Ex5	NC_000012.12:g.32850814G>A	NC_000012.12(NM_001005242.3):c.1330C>T	NP_001005242.2:p.(Gln444Ter)	LIKELY_PATHOGENIC	PVS1,PM2_supporting
12	32824095	G	GTGAGTCAA	12-32824095-G-GTGAGTCAA	PKP2	NM_001005242.3	c.1616_1623dup_p.Val543ThrfsTer72	1	FS	frameshift_variant	Ex7	NC_000012.12:g.32824095_32824096insTGAGTCAA	NC_000012.12(NM_001005242.3):c.1616_1623dup	NP_001005242.2:p.(Val543ThrfsTer72)	PATHOGENIC	PVS1,PM2_supporting,PP5,PS4_supporting
12	32877908	C	CA	12-32877908-C-CA	PKP2	NM_001005242.3	c.971_972insT_p.Ala325GlyfsTer11	1	FS	frameshift_variant	Ex3	NC_000012.12:g.32877908_32877909insA	NC_000012.12(NM_001005242.3):c.971_972insT	NP_001005242.2:p.(Ala325GlyfsTer11)	PATHOGENIC	PVS1,PM2_supporting,PP5,PS4_supporting
12	32792711	CT	C	12-32792711-CT-C	PKP2	NM_001005242.3	c.2377del_p.Ser793ValfsTer94	1	FS	frameshift_variant	Ex12	NC_000012.12:g.32792712del	NC_000012.12(NM_001005242.3):c.2377del	NP_001005242.2:p.(Ser793ValfsTer94)	PATHOGENIC	PVS1_strong,PM2_supporting,PP5,PS4
12	32824134	T	A	12-32824134-T-A	PKP2	NM_001005242.3	c.1585A>T_p.Arg529Ter	1	SG	stop_gained	Ex7	NC_000012.12:g.32824134T>A	NC_000012.12(NM_001005242.3):c.1585A>T	NP_001005242.2:p.(Arg529Ter)	LIKELY_PATHOGENIC	PVS1,PM2_supporting
12	32796262	GGA	G	12-32796262-GGA-G	PKP2	NM_001005242.3	c.2202_2203del_p.Pro735Ter	1	SG	frameshift_variant|stop_gained	Ex11	NC_000012.12:g.32796263_32796264del	NC_000012.12(NM_001005242.3):c.2202_2203del	NP_001005242.2:p.(Pro735Ter)	LIKELY_PATHOGENIC	PVS1,PM2_supporting
12	32869016	C	A	12-32869016-C-A	PKP2	NM_001005242.3	c.1081G>T_p.Glu361Ter	1	SG	stop_gained	Ex4	NC_000012.12:g.32869016C>A	NC_000012.12(NM_001005242.3):c.1081G>T	NP_001005242.2:p.(Glu361Ter)	LIKELY_PATHOGENIC	PVS1,PM2_supporting
12	32821524	G	C	12-32821524-G-C	PKP2	NM_001005242.3	c.1845C>G_p.Tyr615Ter	1	SG	stop_gained	Ex9	NC_000012.12:g.32821524G>C	NC_000012.12(NM_001005242.3):c.1845C>G	NP_001005242.2:p.(Tyr615Ter)	PATHOGENIC	PVS1,PM2_supporting,PP3	LP
12	32878998	A	AT	12-32878998-A-AT	PKP2	NM_001005242.3	c.257dup_p.Tyr86Ter	1	SG	frameshift_variant|stop_gained	Ex2	NC_000012.12:g.32878998_32878999insT	NC_000012.12(NM_001005242.3):c.257dup	NP_001005242.2:p.(Tyr86Ter)	LIKELY_PATHOGENIC	PVS1,PM2_supporting,PP5
12	32841207	T	A	12-32841207-T-A	PKP2	NM_001005242.3	c.1379-2A>T_p.?	1	ESS	splice_acceptor_variant	In5/6	NC_000012.12:g.32841207T>A	NC_000012.12(NM_001005242.3):c.1379-2A>T	NP_001005242.2:p.(?)	PATHOGENIC	PVS1,PM2_supporting,PP5,PS4_supporting
12	32824163	C	G	12-32824163-C-G	PKP2	NM_001005242.3	c.1557-1G>C_p.?	1	ESS	splice_acceptor_variant	In6/7	NC_000012.12:g.32824163C>G	NC_000012.12(NM_001005242.3):c.1557-1G>C	NP_001005242.2:p.(?)	PATHOGENIC	PVS1,PM2_supporting,PP5,PS4_moderate(BP->PS)
12	32822465	A	T	12-32822465-A-T	PKP2	NM_001005242.3	c.1839+2T>A_p.?	1	ESS	splice_donor_variant	In8/9	NC_000012.12:g.32822465A>T	NC_000012.12(NM_001005242.3):c.1839+2T>A	NP_001005242.2:p.(?)	LIKELY_PATHOGENIC	PVS1,PM2_supporting,PP5
12	32802557	C	G	12-32802557-C-G	PKP2	NM_001005242.3	c.2014-1G>C_p.?	1	ESS	splice_acceptor_variant	In9/10	NC_000012.12:g.32802557C>G	NC_000012.12(NM_001005242.3):c.2014-1G>C	NP_001005242.2:p.(?)	PATHOGENIC	PVS1,PM2_supporting,PP5,PS3_supporting(PP->PM),PS4
12	32878222	G	A	12-32878222-G-A	PKP2	NM_001005242.3	c.658C>T_p.Gln220Ter	1	SG	stop_gained	Ex3	NC_000012.12:g.32878222G>A	NC_000012.12(NM_001005242.3):c.658C>T	NP_001005242.2:p.(Gln220Ter)	LIKELY_PATHOGENIC	PVS1,PM2_supporting,PP5,PS4_NA(BP->PP)
12	32868950	G	A	12-32868950-G-A	PKP2	NM_001005242.3	c.1147C>T_p.Gln383Ter	1	SG	stop_gained	Ex4	NC_000012.12:g.32868950G>A	NC_000012.12(NM_001005242.3):c.1147C>T	NP_001005242.2:p.(Gln383Ter)	LIKELY_PATHOGENIC	PVS1,PM2_supporting,PP5,PS4_NA(BP->PP)
12	32821473	C	T	12-32821473-C-T	PKP2	NM_001005242.3	c.1896G>A_p.Trp632Ter	1	SG	stop_gained	Ex9	NC_000012.12:g.32821473C>T	NC_000012.12(NM_001005242.3):c.1896G>A	NP_001005242.2:p.(Trp632Ter)	PATHOGENIC	PVS1,PM2_supporting,PP5,PS4_moderate
12	32822589	G	A	12-32822589-G-A	PKP2	NM_001005242.3	c.1717C>T_p.Gln573Ter	1	SG	stop_gained	Ex8	NC_000012.12:g.32822589G>A	NC_000012.12(NM_001005242.3):c.1717C>T	NP_001005242.2:p.(Gln573Ter)	PATHOGENIC	PVS1,PM2_supporting,PP5,PS4_moderate
12	32821406	G	A	12-32821406-G-A	PKP2	NM_001005242.3	c.1963C>T_p.Gln655Ter	1	SG	stop_gained	Ex9	NC_000012.12:g.32821406G>A	NC_000012.12(NM_001005242.3):c.1963C>T	NP_001005242.2:p.(Gln655Ter)	PATHOGENIC	PVS1,PM2_supporting,PP5,PS4_moderate
12	32802402	C	T	12-32802402-C-T	PKP2	NM_001005242.3	c.2167+1G>A_p.?	1	ESS	splice_donor_variant	In10/11	NC_000012.12:g.32802402C>T	NC_000012.12(NM_001005242.3):c.2167+1G>A	NP_001005242.2:p.(?)	LIKELY_PATHOGENIC	PVS1,PM2_supporting,PP5,PS4_NA(BP->PP)
12	32878483	G	A	12-32878483-G-A	PKP2	NM_001005242.3	c.397C>T_p.Gln133Ter	1	SG	stop_gained	Ex3	NC_000012.12:g.32878483G>A	NC_000012.12(NM_001005242.3):c.397C>T	NP_001005242.2:p.(Gln133Ter)	PATHOGENIC	PVS1,PM2_supporting,PP5,PS4_moderate
12	32850771	ATTTG	A	12-32850771-ATTTG-A	PKP2	NM_001005242.3	c.1369_1372del_p.Gln457Ter	1	SG	frameshift_variant|stop_gained	Ex5	NC_000012.12:g.32850772_32850775del	NC_000012.12(NM_001005242.3):c.1369_1372del	NP_001005242.2:p.(Gln457Ter)	PATHOGENIC	PVS1,PM2_supporting,PP5,PS4_moderate(BP->PS)
12	32868959	C	A	12-32868959-C-A	PKP2	NM_001005242.3	c.1138G>T_p.Glu380Ter	1	SG	stop_gained	Ex4	NC_000012.12:g.32868959C>A	NC_000012.12(NM_001005242.3):c.1138G>T	NP_001005242.2:p.(Glu380Ter)	PATHOGENIC	PVS1,PM2_supporting,PP5,PS4_supporting
12	32796299	C	T	12-32796299-C-T	PKP2	NM_001005242.3	c.2168-1G>A_p.?	1	ESS	splice_acceptor_variant	In10/11	NC_000012.12:g.32796299C>T	NC_000012.12(NM_001005242.3):c.2168-1G>A	NP_001005242.2:p.(?)	PATHOGENIC	PVS1,PM2_supporting,PP5,PS4_supporting
12	32850967	G	A	12-32850967-G-A	PKP2	NM_001005242.3	c.1177C>T_p.Gln393Ter	1	SG	stop_gained	Ex5	NC_000012.12:g.32850967G>A	NC_000012.12(NM_001005242.3):c.1177C>T	NP_001005242.2:p.(Gln393Ter)	PATHOGENIC	PVS1,PM2_supporting,PP5,PS4_supporting(BP->PM)
12	32796108	C	T	12-32796108-C-T	PKP2	NM_001005242.3	c.2357+1G>A_p.?	1	ESS	splice_donor_variant	In11/12	NC_000012.12:g.32796108C>T	NC_000012.12(NM_001005242.3):c.2357+1G>A	NP_001005242.2:p.(?)	PATHOGENIC	PVS1,PM2_supporting,PP5,PS4_moderate(BP->PS)
12	32896730	A	G	12-32896730-A-G	PKP2	NM_001005242.3	c.2T>C_p.Met1?	2	IM	initiator_codon_variant	Ex1	NC_000012.12:g.32896730A>G	NC_000012.12(NM_001005242.3):c.2T>C	NP_001005242.2:p.(Met1?)	LIKELY_PATHOGENIC	PVS1_moderate,PM2_supporting,PM5,PP5,PS4_supporting
12	32879035	G	C	12-32879035-G-C	PKP2	NM_001005242.3	c.224-3C>G_p.?	3	SS	intron_variant|splice_region_variant	In1/2	NC_000012.12:g.32879035G>C	NC_000012.12(NM_001005242.3):c.224-3C>G	NP_001005242.2:p.(?)	LIKELY_PATHOGENIC	PVS1_strong,PM2_supporting,PS4_supporting
12	32792495	T	C	12-32792495-T-C	PKP2	NM_001005242.3	c.2446-3A>G_p.?	3	SS	intron_variant|splice_region_variant	In12/13	NC_000012.12:g.32792495T>C	NC_000012.12(NM_001005242.3):c.2446-3A>G	NP_001005242.2:p.(?)	LIKELY_PATHOGENIC	PVS1_strong,PM2_supporting,PS4_supporting
12	32792493	CT	C	12-32792493-CT-C	PKP2	NM_001005242.3	c.2446-4A[3];[2]_p.?	1	ESS	splice_acceptor_variant	In12/13	NC_000012.12:g.32792494del	NC_000012.12(NM_001005242.3):c.2446-4A[3]%3B[2]	NP_001005242.2:p.(?)	LIKELY_PATHOGENIC	PVS1,PM2_supporting,PS4_NA(BP->PP)
7	151560610	C	A	7-151560610-C-A	PRKAG2	NM_016203.4	c.1592G>T_p.Arg531Leu	2	NSY	missense_variant	Ex15	NC_000007.14:g.151560610C>A	NC_000007.14(NM_016203.4):c.1592G>T	NP_057287.2:p.(Arg531Leu)	LIKELY_PATHOGENIC	PM2_supporting,PM5,PP3_moderate,PS3_supporting(NA->PP),PS4_supporting
3	38622401	C	T	3-38622401-C-T	SCN5A	NM_000335.5	c.481G>A_p.Glu161Lys	2	EE	splice_region_variant|missense_variant	Ex4	NC_000003.12:g.38622401C>T	NC_000003.12(NM_000335.5):c.481G>A	NP_000326.2:p.(Glu161Lys)	PATHOGENIC	PM2_supporting,BP4,PP5,PS3(PP->PS),PS4	LP
3	38606743	C	T	3-38606743-C-T	SCN5A	NM_000335.5	c.1066G>A_p.Asp356Asn	2	NSY	missense_variant	Ex9	NC_000003.12:g.38606743C>T	NC_000003.12(NM_000335.5):c.1066G>A	NP_000326.2:p.(Asp356Asn)	LIKELY_PATHOGENIC	PM2_supporting,PM5,PP5,PS3_supporting(PP->PM),PS4
3	38606710	G	A	3-38606710-G-A	SCN5A	NM_000335.5	c.1099C>T_p.Arg367Cys	2	NSY	missense_variant	Ex9	NC_000003.12:g.38606710G>A	NC_000003.12(NM_000335.5):c.1099C>T	NP_000326.2:p.(Arg367Cys)	LIKELY_PATHOGENIC	PM2_supporting,PM5,PP5,PS3_supporting(PP->PM),PS4
3	38606682	C	T	3-38606682-C-T	SCN5A	NM_000335.5	c.1127G>A_p.Arg376His	2	NSY	missense_variant	Ex9	NC_000003.12:g.38606682C>T	NC_000003.12(NM_000335.5):c.1127G>A	NP_000326.2:p.(Arg376His)	LIKELY_PATHOGENIC	PM2_supporting,PP5,PS3_supporting(PP->PM),PS4
3	38597787	G	A	3-38597787-G-A	SCN5A	NM_000335.5	c.2204C>T_p.Ala735Val	2	NSY	missense_variant	Ex14	NC_000003.12:g.38597787G>A	NC_000003.12(NM_000335.5):c.2204C>T	NP_000326.2:p.(Ala735Val)	LIKELY_PATHOGENIC	PM2_supporting,PM5,PP5,PS3_supporting(PP->PM),PS4_moderate
3	38586037	C	T	3-38586037-C-T	SCN5A	NM_000335.5	c.2441G>A_p.Arg814Gln	2	NSY	missense_variant	Ex16	NC_000003.12:g.38586037C>T	NC_000003.12(NM_000335.5):c.2441G>A	NP_000326.2:p.(Arg814Gln)	LIKELY_PATHOGENIC	PM2_supporting,PM5,PP3,BS3_supporting,PS4
3	38585801	G	A	3-38585801-G-A	SCN5A	NM_000335.5	c.2677C>T_p.Arg893Cys	2	NSY	missense_variant	Ex16	NC_000003.12:g.38585801G>A	NC_000003.12(NM_000335.5):c.2677C>T	NP_000326.2:p.(Arg893Cys)	LIKELY_PATHOGENIC	PM2_supporting,PM5,PS3_supporting(PP->PM),PS4
3	38585800	C	T	3-38585800-C-T	SCN5A	NM_000335.5	c.2678G>A_p.Arg893His	2	NSY	missense_variant	Ex16	NC_000003.12:g.38585800C>T	NC_000003.12(NM_000335.5):c.2678G>A	NP_000326.2:p.(Arg893His)	LIKELY_PATHOGENIC	PM2_supporting,PM5,PS4
3	38585749	G	A	3-38585749-G-A	SCN5A	NM_000335.5	c.2729C>T_p.Ser910Leu	2	NSY	missense_variant	Ex16	NC_000003.12:g.38585749G>A	NC_000003.12(NM_000335.5):c.2729C>T	NP_000326.2:p.(Ser910Leu)	LIKELY_PATHOGENIC	PM2_supporting,PS3_supporting(PP->PM),PS4
3	38630393	G	A	3-38630393-G-A	SCN5A	NM_000335.5	c.310C>T_p.Arg104Trp	2	NSY	missense_variant	Ex3	NC_000003.12:g.38630393G>A	NC_000003.12(NM_000335.5):c.310C>T	NP_000326.2:p.(Arg104Trp)	PATHOGENIC	PM2_supporting,PM5,PP3,PP5,PS3(PP->PS),PS4_moderate
3	38630392	C	T	3-38630392-C-T	SCN5A	NM_000335.5	c.311G>A_p.Arg104Gln	2	NSY	missense_variant	Ex3	NC_000003.12:g.38630392C>T	NC_000003.12(NM_000335.5):c.311G>A	NP_000326.2:p.(Arg104Gln)	PATHOGENIC	PM2_supporting,PM5,PS3(PP->PS),PS4
3	38566426	C	T	3-38566426-C-T	SCN5A	NM_000335.5	c.3820G>A_p.Asp1274Asn	2	NSY	missense_variant	Ex21	NC_000003.12:g.38566426C>T	NC_000003.12(NM_000335.5):c.3820G>A	NP_000326.2:p.(Asp1274Asn)	LIKELY_PATHOGENIC	PM2_supporting,PM5,PP5,PS3_supporting(PP->PM),PS4
3	38562422	C	A	3-38562422-C-A	SCN5A	NM_000335.5	c.3953G>T_p.Gly1318Val	2	NSY	missense_variant	Ex22	NC_000003.12:g.38562422C>A	NC_000003.12(NM_000335.5):c.3953G>T	NP_000326.2:p.(Gly1318Val)	LIKELY_PATHOGENIC	PM2_supporting,PS3_supporting(PP->PM),PS4
3	38560170	C	T	3-38560170-C-T	SCN5A	NM_000335.5	c.4219G>A_p.Gly1407Arg	2	NSY	missense_variant	Ex23	NC_000003.12:g.38560170C>T	NC_000003.12(NM_000335.5):c.4219G>A	NP_000326.2:p.(Gly1407Arg)	LIKELY_PATHOGENIC	PM2_supporting,PP3,PP5,PS3_supporting(PP->PM),PS4
3	38551519	GAGA	G	3-38551519-GAGA-G	SCN5A	NM_000335.5	c.4842CTT[2];[1]_p.Phe1615[2];[1]	2	IF	inframe_deletion	Ex28	NC_000003.12:g.38551520_38551522del	NC_000003.12(NM_000335.5):c.4842CTT[2]%3B[1]	NP_000326.2:p.(Phe1615[2]%3B[1])	LIKELY_PATHOGENIC	PM2_supporting,PP5,PM4,PS3_NA(BP->PP),PS4
3	38557248	C	A	3-38557248-C-A	SCN5A	NM_000335.5	c.4279G>T_p.Ala1427Ser	2	NSY	missense_variant	Ex24	NC_000003.12:g.38557248C>A	NC_000003.12(NM_000335.5):c.4279G>T	NP_000326.2:p.(Ala1427Ser)	LIKELY_PATHOGENIC	PM2_supporting,PS3_supporting(PP->PM),PS4
3	38551478	G	A	3-38551478-G-A	SCN5A	NM_000335.5	c.4891C>T_p.Arg1631Cys	2	NSY	missense_variant	Ex28	NC_000003.12:g.38551478G>A	NC_000003.12(NM_000335.5):c.4891C>T	NP_000326.2:p.(Arg1631Cys)	LIKELY_PATHOGENIC	PM2_supporting,PM5,PP5,PS3_supporting(PP->PM),PS4_moderate
3	38551477	C	T	3-38551477-C-T	SCN5A	NM_000335.5	c.4892G>A_p.Arg1631His	2	NSY	missense_variant	Ex28	NC_000003.12:g.38551477C>T	NC_000003.12(NM_000335.5):c.4892G>A	NP_000326.2:p.(Arg1631His)	LIKELY_PATHOGENIC	PM2_supporting,PM5,PS3_supporting(PP->PM),PS4_moderate
3	38551441	C	T	3-38551441-C-T	SCN5A	NM_000335.5	c.4928G>A_p.Arg1643His	2	NSY	missense_variant	Ex28	NC_000003.12:g.38551441C>T	NC_000003.12(NM_000335.5):c.4928G>A	NP_000326.2:p.(Arg1643His)	PATHOGENIC	PM2_supporting,PP5,PS3(PP->PS),PS4
3	38551391	C	T	3-38551391-C-T	SCN5A	NM_000335.5	c.4978G>A_p.Gly1660Arg	2	NSY	missense_variant	Ex28	NC_000003.12:g.38551391C>T	NC_000003.12(NM_000335.5):c.4978G>A	NP_000326.2:p.(Gly1660Arg)	LIKELY_PATHOGENIC	PM2_supporting,PS3(PP->PS),PS4_moderate
3	38633181	G	A	3-38633181-G-A	SCN5A	NM_000335.5	c.127C>T_p.Arg43Ter	1	SG	stop_gained	Ex2	NC_000003.12:g.38633181G>A	NC_000003.12(NM_000335.5):c.127C>T	NP_000326.2:p.(Arg43Ter)	PATHOGENIC	PVS1,PM2_supporting,PP5,PS4_moderate
3	38633360	C	T	3-38633360-C-T	SCN5A	NM_000335.5	c.-52-1G>A_p.?	1	ESS	splice_acceptor_variant	In1/2	NC_000003.12:g.38633360C>T	NC_000003.12(NM_000335.5):c.-52-1G>A	NP_000326.2:p.(?)	LIKELY_PATHOGENIC	PVS1,PM2_supporting
3	38605949	A	T	3-38605949-A-T	SCN5A	NM_000335.5	c.1338+2T>A_p.?	1	ESS	splice_donor_variant	In10/11	NC_000003.12:g.38605949A>T	NC_000003.12(NM_000335.5):c.1338+2T>A	NP_000326.2:p.(?)	PATHOGENIC	PVS1,PM2_supporting,PP5,PS4_moderate	LP
3	38587575	T	C	3-38587575-T-C	SCN5A	NM_000335.5	c.2263-2A>G_p.?	1	ESS	splice_acceptor_variant	In14/15	NC_000003.12:g.38587575T>C	NC_000003.12(NM_000335.5):c.2263-2A>G	NP_000326.2:p.(?)	LIKELY_PATHOGENIC	PVS1,PM2_supporting,PP5
3	38604785	C	A	3-38604785-C-A	SCN5A	NM_000335.5	c.1462G>T_p.Glu488Ter	1	SG	stop_gained	Ex11	NC_000003.12:g.38604785C>A	NC_000003.12(NM_000335.5):c.1462G>T	NP_000326.2:p.(Glu488Ter)	LIKELY_PATHOGENIC	PVS1,PM2_supporting,PP5
3	38603999	G	A	3-38603999-G-A	SCN5A	NM_000335.5	c.1603C>T_p.Arg535Ter	1	SG	stop_gained	Ex12	NC_000003.12:g.38603999G>A	NC_000003.12(NM_000335.5):c.1603C>T	NP_000326.2:p.(Arg535Ter)	PATHOGENIC	PVS1,PM2_supporting,PP3,PP5,PS4
3	38633133	G	A	3-38633133-G-A	SCN5A	NM_000335.5	c.175C>T_p.Gln59Ter	1	SG	stop_gained	Ex2	NC_000003.12:g.38633133G>A	NC_000003.12(NM_000335.5):c.175C>T	NP_000326.2:p.(Gln59Ter)	LIKELY_PATHOGENIC	PVS1,PM2_supporting,PP5
3	38603729	C	A	3-38603729-C-A	SCN5A	NM_000335.5	c.1873G>T_p.Glu625Ter	1	SG	stop_gained	Ex12	NC_000003.12:g.38603729C>A	NC_000003.12(NM_000335.5):c.1873G>T	NP_000326.2:p.(Glu625Ter)	LIKELY_PATHOGENIC	PVS1,PM2_supporting
3	38560249	CTTG	C	3-38560249-CTTG-C	SCN5A	NM_000335.5	c.4132AAC[2];[1]_p.Asn1378[2];[1]	2	IF	inframe_deletion	Ex23	NC_000003.12:g.38560250_38560252del	NC_000003.12(NM_000335.5):c.4132AAC[2]%3B[1]	NP_000326.2:p.(Asn1378[2]%3B[1])	LIKELY_PATHOGENIC	PM2_supporting,PM4,PS3_supporting(PP->PM),PS4_moderate
3	38551243	G	A	3-38551243-G-A	SCN5A	NM_000335.5	c.5126C>T_p.Ser1709Leu	2	NSY	missense_variant	Ex28	NC_000003.12:g.38551243G>A	NC_000003.12(NM_000335.5):c.5126C>T	NP_000326.2:p.(Ser1709Leu)	LIKELY_PATHOGENIC	PM2_supporting,PP5,PS3_supporting(PP->PM),PS4
3	38551022	C	T	3-38551022-C-T	SCN5A	NM_000335.5	c.5347G>A_p.Glu1783Lys	2	NSY	missense_variant	Ex28	NC_000003.12:g.38551022C>T	NC_000003.12(NM_000335.5):c.5347G>A	NP_000326.2:p.(Glu1783Lys)	PATHOGENIC	PM2_supporting,PP5,PS3(PP->PS),PS4	P
3	38613773	G	A	3-38613773-G-A	SCN5A	NM_000335.5	c.673C>T_p.Arg225Trp	2	NSY	missense_variant	Ex6	NC_000003.12:g.38613773G>A	NC_000003.12(NM_000335.5):c.673C>T	NP_000326.2:p.(Arg225Trp)	LIKELY_PATHOGENIC	PM2_supporting,PM5,PP3,PS3_supporting(BP->PP),PS4
3	38613772	C	T	3-38613772-C-T	SCN5A	NM_000335.5	c.674G>A_p.Arg225Gln	2	NSY	missense_variant	Ex6	NC_000003.12:g.38613772C>T	NC_000003.12(NM_000335.5):c.674G>A	NP_000326.2:p.(Arg225Gln)	LIKELY_PATHOGENIC	PM2_supporting,PM5,PS3(PP->PS),PS4_supporting(BP->PM)
3	38609823	C	T	3-38609823-C-T	SCN5A	NM_000335.5	c.845G>A_p.Arg282His	2	NSY	missense_variant	Ex7	NC_000003.12:g.38609823C>T	NC_000003.12(NM_000335.5):c.845G>A	NP_000326.2:p.(Arg282His)	LIKELY_PATHOGENIC	PM2_supporting,PP5,PS3_supporting(PP->PM),PS4	P
3	38580945	C	A	3-38580945-C-A	SCN5A	NM_000335.5	c.3214G>T_p.Glu1072Ter	1	SG	stop_gained	Ex17	NC_000003.12:g.38580945C>A	NC_000003.12(NM_000335.5):c.3214G>T	NP_000326.2:p.(Glu1072Ter)	LIKELY_PATHOGENIC	PVS1,PM2_supporting,PP5,PS4_NA(BP->PP)
3	38580910	CATGCAGGGGTGAGGGCCCACCTGCTTGCTGGACTCCTCCTCCGTGCCCAGGCTGTTCTCCTCATCTTCTTCTTGGTCATCTGTGTCT	C	3-38580910-CATGCAGGGGTGAGGGCCCACCTGCTTGCTGGACTCCTCCTCCGTGCCCAGGCTGTTCTCCTCATCTTCTTCTTGGTCATCTGTGTCT-C	SCN5A	NM_000335.5	c.3162_3228+20del_p.?	1	ESS	splice_acceptor_variant	Ex17-In17/18	NC_000003.12:g.38580911_38580997del	NC_000003.12(NM_000335.5):c.3162_3228+20del	NP_000326.2:p.(?)	LIKELY_PATHOGENIC	PVS1,PM2_supporting
3	38575452	C	G	3-38575452-C-G	SCN5A	NM_000335.5	c.3509-1G>C_p.?	1	ESS	splice_acceptor_variant	In19/20	NC_000003.12:g.38575452C>G	NC_000003.12(NM_000335.5):c.3509-1G>C	NP_000326.2:p.(?)	LIKELY_PATHOGENIC	PVS1,PM2_supporting,PP5
3	38579372	G	A	3-38579372-G-A	SCN5A	NM_000335.5	c.3349C>T_p.Gln1117Ter	1	SG	stop_gained	Ex18	NC_000003.12:g.38579372G>A	NC_000003.12(NM_000335.5):c.3349C>T	NP_000326.2:p.(Gln1117Ter)	PATHOGENIC	PVS1,PM2_supporting,PP3,PP5,PS4_moderate
3	38554372	C	A	3-38554372-C-A	SCN5A	NM_000335.5	c.4717G>T_p.Glu1573Ter	1	SG	stop_gained	Ex27	NC_000003.12:g.38554372C>A	NC_000003.12(NM_000335.5):c.4717G>T	NP_000326.2:p.(Glu1573Ter)	PATHOGENIC	PVS1,PM2_supporting,PP5,PS4_supporting	LP
3	38566408	C	T	3-38566408-C-T	SCN5A	NM_000335.5	c.3837+1G>A_p.?	1	ESS	splice_donor_variant	In21/22	NC_000003.12:g.38566408C>T	NC_000003.12(NM_000335.5):c.3837+1G>A	NP_000326.2:p.(?)	PATHOGENIC	PVS1,PM2_supporting,PP5,PS4
3	38560427	ACCT	A	3-38560427-ACCT-A	SCN5A	NM_000335.5	c.3961-2_3961del_p.?	1	ESS	splice_donor_variant	In22/23-Ex23	NC_000003.12:g.38560428_38560430del	NC_000003.12(NM_000335.5):c.3961-2_3961del	NP_000326.2:p.(?)	LIKELY_PATHOGENIC	PVS1,PM2_supporting,PP5
3	38551505	G	A	3-38551505-G-A	SCN5A	NM_000335.5	c.4864C>T_p.Arg1622Ter	1	SG	stop_gained	Ex28	NC_000003.12:g.38551505G>A	NC_000003.12(NM_000335.5):c.4864C>T	NP_000326.2:p.(Arg1622Ter)	PATHOGENIC	PVS1_strong,PM2_supporting,PP5,PS3_supporting(PP->PM),PS4
3	38551487	G	A	3-38551487-G-A	SCN5A	NM_000335.5	c.4882C>T_p.Arg1628Ter	1	SG	stop_gained	Ex28	NC_000003.12:g.38551487G>A	NC_000003.12(NM_000335.5):c.4882C>T	NP_000326.2:p.(Arg1628Ter)	LIKELY_PATHOGENIC	PVS1_strong,PM2_supporting,PP5,PS3_supporting(PP->PM),PS4_moderate
3	38557230	C	T	3-38557230-C-T	SCN5A	NM_000335.5	c.4296+1G>A_p.?	1	ESS	splice_donor_variant	In24/25	NC_000003.12:g.38557230C>T	NC_000003.12(NM_000335.5):c.4296+1G>A	NP_000326.2:p.(?)	PATHOGENIC	PVS1,PM2_supporting,PP5,PS4_supporting
3	38551460	G	A	3-38551460-G-A	SCN5A	NM_000335.5	c.4909C>T_p.Arg1637Ter	1	SG	stop_gained	Ex28	NC_000003.12:g.38551460G>A	NC_000003.12(NM_000335.5):c.4909C>T	NP_000326.2:p.(Arg1637Ter)	LIKELY_PATHOGENIC	PVS1_strong,PM2_supporting,PP5,PS4_moderate
3	38620842	C	T	3-38620842-C-T	SCN5A	NM_000335.5	c.611+1G>A_p.?	1	ESS	splice_donor_variant	In5/6	NC_000003.12:g.38620842C>T	NC_000003.12(NM_000335.5):c.611+1G>A	NP_000326.2:p.(?)	PATHOGENIC	PVS1,PM2_supporting,PP5,PS4_moderate
3	38613836	T	C	3-38613836-T-C	SCN5A	NM_000335.5	c.612-2A>G_p.?	1	ESS	splice_acceptor_variant	In5/6	NC_000003.12:g.38613836T>C	NC_000003.12(NM_000335.5):c.612-2A>G	NP_000326.2:p.(?)	PATHOGENIC	PVS1,PM2_supporting,PS4_supporting(BP->PM)
3	38609733	C	T	3-38609733-C-T	SCN5A	NM_000335.5	c.934+1G>A_p.?	1	ESS	splice_donor_variant	In7/8	NC_000003.12:g.38609733C>T	NC_000003.12(NM_000335.5):c.934+1G>A	NP_000326.2:p.(?)	PATHOGENIC	PVS1,PM2_supporting,PP5,PS4
3	38613782	G	A	3-38613782-G-A	SCN5A	NM_000335.5	c.664C>T_p.Arg222Ter	1	SG	stop_gained	Ex6	NC_000003.12:g.38613782G>A	NC_000003.12(NM_000335.5):c.664C>T	NP_000326.2:p.(Arg222Ter)	PATHOGENIC	PVS1,PM2_supporting,PP3,PP5,PS3_supporting(PP->PM),PS4
3	38556436	C	T	3-38556436-C-T	SCN5A	NM_000335.5	c.4434+5G>A_p.?	2	SS5	splice_donor_5th_base_variant	In25/26	NC_000003.12:g.38556436C>T	NC_000003.12(NM_000335.5):c.4434+5G>A	NP_000326.2:p.(?)	LIKELY_PATHOGENIC	PVS1_strong,PM2_supporting,PS3_supporting(PP->PM),PS4_moderate	P
3	38604763	G	GCA	3-38604763-G-GCA	SCN5A	NM_000335.5	c.1483_1484insTG_p.Pro495LeufsTer13	1	FS	frameshift_variant	Ex11	NC_000003.12:g.38604763_38604764insCA	NC_000003.12(NM_000335.5):c.1483_1484insTG	NP_000326.2:p.(Pro495LeufsTer13)	LIKELY_PATHOGENIC	PVS1,PM2_supporting
3	38603949	CG	C	3-38603949-CG-C	SCN5A	NM_000335.5	c.1652del_p.Ala551GlyfsTer72	1	FS	frameshift_variant	Ex12	NC_000003.12:g.38603950del	NC_000003.12(NM_000335.5):c.1652del	NP_000326.2:p.(Ala551GlyfsTer72)	LIKELY_PATHOGENIC	PVS1,PM2_supporting,PP5
3	38603902	AG	A	3-38603902-AG-A	SCN5A	NM_000335.5	c.1699del_p.Leu567CysfsTer56	1	FS	frameshift_variant	Ex12	NC_000003.12:g.38603903del	NC_000003.12(NM_000335.5):c.1699del	NP_000326.2:p.(Leu567CysfsTer56)	LIKELY_PATHOGENIC	PVS1,PM2_supporting,PP5
3	38599004	TG	T	3-38599004-TG-T	SCN5A	NM_000335.5	c.1936del_p.Gln646ArgfsTer5	1	FS	frameshift_variant	Ex13	NC_000003.12:g.38599005del	NC_000003.12(NM_000335.5):c.1936del	NP_000326.2:p.(Gln646ArgfsTer5)	PATHOGENIC	PVS1,PM2_supporting,PP5,PS4
3	38587442	CA	C	3-38587442-CA-C	SCN5A	NM_000335.5	c.2393del_p.Leu798ArgfsTer4	1	FS	frameshift_variant	Ex15	NC_000003.12:g.38587443del	NC_000003.12(NM_000335.5):c.2393del	NP_000326.2:p.(Leu798ArgfsTer4)	LIKELY_PATHOGENIC	PVS1,PM2_supporting,PP5
3	38587400	C	CAGGCG	3-38587400-C-CAGGCG	SCN5A	NM_000335.5	c.2431_2435dup_p.Leu813AlafsTer15	1	FS	splice_region_variant|frameshift_variant	Ex15	NC_000003.12:g.38587400_38587401insAGGCG	NC_000003.12(NM_000335.5):c.2431_2435dup	NP_000326.2:p.(Leu813AlafsTer15)	LIKELY_PATHOGENIC	PVS1,PM2_supporting,PP5
3	38585944	AC	A	3-38585944-AC-A	SCN5A	NM_000335.5	c.2533del_p.Val845CysfsTer2	1	FS	frameshift_variant	Ex16	NC_000003.12:g.38585945del	NC_000003.12(NM_000335.5):c.2533del	NP_000326.2:p.(Val845CysfsTer2)	PATHOGENIC	PVS1,PM2_supporting,PP5,PS4_moderate
3	38585926	A	AAC	3-38585926-A-AAC	SCN5A	NM_000335.5	c.2550_2551dup_p.Phe851CysfsTer19	1	FS	frameshift_variant	Ex16	NC_000003.12:g.38585926_38585927insAC	NC_000003.12(NM_000335.5):c.2550_2551dup	NP_000326.2:p.(Phe851CysfsTer19)	PATHOGENIC	PVS1,PM2_supporting,PP5,PS4_moderate
3	38585894	CAA	C	3-38585894-CAA-C	SCN5A	NM_000335.5	c.2582_2583del_p.Phe861TrpfsTer90	1	FS	frameshift_variant	Ex16	NC_000003.12:g.38585895_38585896del	NC_000003.12(NM_000335.5):c.2582_2583del	NP_000326.2:p.(Phe861TrpfsTer90)	PATHOGENIC	PVS1,PM2_supporting,PP5,PS4
3	38581292	ATC	A	3-38581292-ATC-A	SCN5A	NM_000335.5	c.2865_2866del_p.Glu955AspfsTer74	1	FS	frameshift_variant	Ex17	NC_000003.12:g.38581293_38581294del	NC_000003.12(NM_000335.5):c.2865_2866del	NP_000326.2:p.(Glu955AspfsTer74)	PATHOGENIC	PVS1,PM2_supporting,PP5,PS4_supporting	LP
3	38581258	CT	C	3-38581258-CT-C	SCN5A	NM_000335.5	c.2900del_p.Gln967ArgfsTer177	1	FS	frameshift_variant	Ex17	NC_000003.12:g.38581259del	NC_000003.12(NM_000335.5):c.2900del	NP_000326.2:p.(Gln967ArgfsTer177)	LIKELY_PATHOGENIC	PVS1,PM2_supporting,PP5
3	38581117	TGGGGGTGGCGGGGAGTA	T	3-38581117-TGGGGGTGGCGGGGAGTA-T	SCN5A	NM_000335.5	c.3025_3041del_p.Tyr1009ArgfsTer15	1	FS	frameshift_variant	Ex17	NC_000003.12:g.38581118_38581134del	NC_000003.12(NM_000335.5):c.3025_3041del	NP_000326.2:p.(Tyr1009ArgfsTer15)	LIKELY_PATHOGENIC	PVS1,PM2_supporting,PP5
3	38581013	ATGGG	A	3-38581013-ATGGG-A	SCN5A	NM_000335.5	c.3142_3145del_p.Pro1048SerfsTer95	1	FS	frameshift_variant	Ex17	NC_000003.12:g.38581014_38581017del	NC_000003.12(NM_000335.5):c.3142_3145del	NP_000326.2:p.(Pro1048SerfsTer95)	LIKELY_PATHOGENIC	PVS1,PM2_supporting
3	38581011	C	CA	3-38581011-C-CA	SCN5A	NM_000335.5	c.3147_3148insT_p.Ala1050CysfsTer9	1	FS	frameshift_variant	Ex17	NC_000003.12:g.38581011_38581012insA	NC_000003.12(NM_000335.5):c.3147_3148insT	NP_000326.2:p.(Ala1050CysfsTer9)	LIKELY_PATHOGENIC	PVS1,PM2_supporting
3	38581010	G	GT	3-38581010-G-GT	SCN5A	NM_000335.5	c.3148_3149insA_p.Ala1050AspfsTer9	1	FS	frameshift_variant	Ex17	NC_000003.12:g.38581010_38581011insT	NC_000003.12(NM_000335.5):c.3148_3149insA	NP_000326.2:p.(Ala1050AspfsTer9)	LIKELY_PATHOGENIC	PVS1,PM2_supporting
3	38581005	C	CA	3-38581005-C-CA	SCN5A	NM_000335.5	c.3153_3154insT_p.Ala1052CysfsTer7	1	FS	frameshift_variant	Ex17	NC_000003.12:g.38581005_38581006insA	NC_000003.12(NM_000335.5):c.3153_3154insT	NP_000326.2:p.(Ala1052CysfsTer7)	LIKELY_PATHOGENIC	PVS1,PM2_supporting
3	38579447	TG	T	3-38579447-TG-T	SCN5A	NM_000335.5	c.3273del_p.Arg1092GlyfsTer52	1	FS	frameshift_variant	Ex18	NC_000003.12:g.38579448del	NC_000003.12(NM_000335.5):c.3273del	NP_000326.2:p.(Arg1092GlyfsTer52)	LIKELY_PATHOGENIC	PVS1,PM2_supporting,PP5
3	38566465	C	CG	3-38566465-C-CG	SCN5A	NM_000335.5	c.3780dup_p.Gly1261ArgfsTer57	1	FS	frameshift_variant	Ex21	NC_000003.12:g.38566465_38566466insG	NC_000003.12(NM_000335.5):c.3780dup	NP_000326.2:p.(Gly1261ArgfsTer57)	LIKELY_PATHOGENIC	PVS1,PM2_supporting
3	38562513	T	TG	3-38562513-T-TG	SCN5A	NM_000335.5	c.3861dup_p.Asn1288GlnfsTer30	1	FS	frameshift_variant	Ex22	NC_000003.12:g.38562513_38562514insG	NC_000003.12(NM_000335.5):c.3861dup	NP_000326.2:p.(Asn1288GlnfsTer30)	LIKELY_PATHOGENIC	PVS1,PM2_supporting
3	38560303	GC	G	3-38560303-GC-G	SCN5A	NM_000335.5	c.4085del_p.Cys1362SerfsTer11	1	FS	frameshift_variant	Ex23	NC_000003.12:g.38560304del	NC_000003.12(NM_000335.5):c.4085del	NP_000326.2:p.(Cys1362SerfsTer11)	LIKELY_PATHOGENIC	PVS1,PM2_supporting,PP5
3	38556549	GT	G	3-38556549-GT-G	SCN5A	NM_000335.5	c.4325del_p.Asn1442ThrfsTer20	1	FS	frameshift_variant	Ex25	NC_000003.12:g.38556550del	NC_000003.12(NM_000335.5):c.4325del	NP_000326.2:p.(Asn1442ThrfsTer20)	LIKELY_PATHOGENIC	PVS1,PM2_supporting,PP5
3	38556481	AT	A	3-38556481-AT-A	SCN5A	NM_000335.5	c.4393del_p.Ile1465LeufsTer15	1	FS	frameshift_variant	Ex25	NC_000003.12:g.38556482del	NC_000003.12(NM_000335.5):c.4393del	NP_000326.2:p.(Ile1465LeufsTer15)	LIKELY_PATHOGENIC	PVS1,PM2_supporting,PP5
3	38554469	AT	A	3-38554469-AT-A	SCN5A	NM_000335.5	c.4619del_p.Asn1540IlefsTer3	1	FS	frameshift_variant	Ex27	NC_000003.12:g.38554470del	NC_000003.12(NM_000335.5):c.4619del	NP_000326.2:p.(Asn1540IlefsTer3)	LIKELY_PATHOGENIC	PVS1,PM2_supporting,PP5
3	38551150	TC	T	3-38551150-TC-T	SCN5A	NM_000335.5	c.5218del_p.Asp1740ThrfsTer46	1	FS	frameshift_variant	Ex28	NC_000003.12:g.38551151del	NC_000003.12(NM_000335.5):c.5218del	NP_000326.2:p.(Asp1740ThrfsTer46)	LIKELY_PATHOGENIC	PVS1_strong,PM2_supporting,PS4_supporting
3	38550904	TCAGA	T	3-38550904-TCAGA-T	SCN5A	NM_000335.5	c.5461_5464del_p.Glu1822HisfsTer10	1	FS	frameshift_variant	Ex28	NC_000003.12:g.38550905_38550908del	NC_000003.12(NM_000335.5):c.5461_5464del	NP_000326.2:p.(Glu1822HisfsTer10)	LIKELY_PATHOGENIC	PVS1_strong,PM2_supporting,PP5,PS4_supporting
3	38550545	CAG	C	3-38550545-CAG-C	SCN5A	NM_000335.5	c.5822_5823del_p.Pro1941ArgfsTer12	1	FS	frameshift_variant	Ex28	NC_000003.12:g.38550546_38550547del	NC_000003.12(NM_000335.5):c.5822_5823del	NP_000326.2:p.(Pro1941ArgfsTer12)	LIKELY_PATHOGENIC	PVS1_strong,PM2_supporting,PS4_moderate
3	38613790	C	CTGAAT	3-38613790-C-CTGAAT	SCN5A	NM_000335.5	c.655_656insATTCA_p.Arg219HisfsTer11	1	FS	frameshift_variant	Ex6	NC_000003.12:g.38613790_38613791insTGAAT	NC_000003.12(NM_000335.5):c.655_656insATTCA	NP_000326.2:p.(Arg219HisfsTer11)	LIKELY_PATHOGENIC	PVS1,PM2_supporting,PP5
3	14141665	C	T	3-14141665-C-T	TMEM43	NM_024334.3	c.1073C>T_p.Ser358Leu	2	NSY	missense_variant	Ex12	NC_000003.12:g.14141665C>T	NC_000003.12(NM_024334.3):c.1073C>T	NP_077310.1:p.(Ser358Leu)	LIKELY_PATHOGENIC	PM2_supporting,PP5,PS3_supporting(BP->PM),PS4
3	52453993	G	A	3-52453993-G-A	TNNC1	NM_003280.3	c.23C>T_p.Ala8Val	2	EE	splice_region_variant|missense_variant	Ex1	NC_000003.12:g.52453993G>A	NC_000003.12(NM_003280.3):c.23C>T	NP_003271.1:p.(Ala8Val)	LIKELY_PATHOGENIC	PM2_supporting,PP3,PS3_supporting(BP->PP),PS4
19	55154095	G	A	19-55154095-G-A	TNNI3	NM_000363.5	c.484C>T_p.Arg162Trp	2	NSY	missense_variant	Ex7	NC_000019.10:g.55154095G>A	NC_000019.10(NM_000363.5):c.484C>T	NP_000354.4:p.(Arg162Trp)	LIKELY_PATHOGENIC	PM2_supporting,PM5,PP3,PS3_supporting(PP->PM),PS4
19	55154145	C	T	19-55154145-C-T	TNNI3	NM_000363.5	c.434G>A_p.Arg145Gln	2	NSY	missense_variant	Ex7	NC_000019.10:g.55154145C>T	NC_000019.10(NM_000363.5):c.434G>A	NP_000354.4:p.(Arg145Gln)	PATHOGENIC	PM2_supporting,PM5,PP3_moderate,PP5,PS3(PP->PS),PS4
19	55154146	G	A	19-55154146-G-A	TNNI3	NM_000363.5	c.433C>T_p.Arg145Trp	2	NSY	missense_variant	Ex7	NC_000019.10:g.55154146G>A	NC_000019.10(NM_000363.5):c.433C>T	NP_000354.4:p.(Arg145Trp)	PATHOGENIC	PM2_supporting,PM5,PP3_moderate,PP5,PS3(PP->PS),PS4
19	55154094	C	T	19-55154094-C-T	TNNI3	NM_000363.5	c.485G>A_p.Arg162Gln	2	NSY	missense_variant	Ex7	NC_000019.10:g.55154094C>T	NC_000019.10(NM_000363.5):c.485G>A	NP_000354.4:p.(Arg162Gln)	LIKELY_PATHOGENIC	PM2_supporting,PM5,PP5,PS3_supporting(PP->PM),PS4
19	55154082	G	A	19-55154082-G-A	TNNI3	NM_000363.5	c.497C>T_p.Ser166Phe	2	NSY	missense_variant	Ex7	NC_000019.10:g.55154082G>A	NC_000019.10(NM_000363.5):c.497C>T	NP_000354.4:p.(Ser166Phe)	LIKELY_PATHOGENIC	PM2_supporting,PP3,PP5,PS3_supporting(PP->PM),PS4
19	55151881	C	T	19-55151881-C-T	TNNI3	NM_000363.5	c.586G>A_p.Asp196Asn	2	NSY	missense_variant	Ex8	NC_000019.10:g.55151881C>T	NC_000019.10(NM_000363.5):c.586G>A	NP_000354.4:p.(Asp196Asn)	LIKELY_PATHOGENIC	PM2_supporting,PP3_moderate,PP5,PS4
19	55154070	C	T	19-55154070-C-T	TNNI3	NM_000363.5	c.509G>A_p.Arg170Gln	2	NSY	missense_variant	Ex7	NC_000019.10:g.55154070C>T	NC_000019.10(NM_000363.5):c.509G>A	NP_000354.4:p.(Arg170Gln)	PATHOGENIC	PM2_supporting,PM5,PP3_moderate,PP5,PS3_supporting(NA->PP),PS4
19	55154109	G	A	19-55154109-G-A	TNNI3	NM_000363.5	c.470C>T_p.Ala157Val	2	NSY	missense_variant	Ex7	NC_000019.10:g.55154109G>A	NC_000019.10(NM_000363.5):c.470C>T	NP_000354.4:p.(Ala157Val)	LIKELY_PATHOGENIC	PM2_supporting,PP3,PP5,PS3_supporting(PP->PM),PS4
19	55154068	C	T	19-55154068-C-T	TNNI3	NM_000363.5	c.511G>A_p.Ala171Thr	2	NSY	missense_variant	Ex7	NC_000019.10:g.55154068C>T	NC_000019.10(NM_000363.5):c.511G>A	NP_000354.4:p.(Ala171Thr)	LIKELY_PATHOGENIC	PM2_supporting,PP3_moderate,PS3_supporting(PP->PM),PS4_moderate
1	201365638	A	T	1-201365638-A-T	TNNT2	NM_001276345.2	c.266T>A_p.Ile89Asn	2	NSY	missense_variant	Ex9	NC_000001.11:g.201365638A>T	NC_000001.11(NM_001276345.2):c.266T>A	NP_001263274.1:p.(Ile89Asn)	PATHOGENIC	PM2_supporting,PP3_moderate,PP5,PS3(PP->PS),PS4
1	201365298	G	A	1-201365298-G-A	TNNT2	NM_001276345.2	c.304C>T_p.Arg102Trp	2	NSY	missense_variant	Ex10	NC_000001.11:g.201365298G>A	NC_000001.11(NM_001276345.2):c.304C>T	NP_001263274.1:p.(Arg102Trp)	PATHOGENIC	PM2_supporting,PM5,PP3_moderate,PP5,PS3(PP->PS),PS4
1	201365291	C	A	1-201365291-C-A	TNNT2	NM_001276345.2	c.311G>T_p.Arg104Leu	2	NSY	missense_variant	Ex10	NC_000001.11:g.201365291C>A	NC_000001.11(NM_001276345.2):c.311G>T	NP_001263274.1:p.(Arg104Leu)	PATHOGENIC	PM2_supporting,PM5,PP3_moderate,PP5,PS3_supporting(BP->PP),PS4	LP
1	201365242	A	C	1-201365242-A-C	TNNT2	NM_001276345.2	c.360T>G_p.Phe120Leu	2	NSY	missense_variant	Ex10	NC_000001.11:g.201365242A>C	NC_000001.11(NM_001276345.2):c.360T>G	NP_001263274.1:p.(Phe120Leu)	PATHOGENIC	PS1,PM2_supporting,PM5,PP3_moderate,PP5,PS3(NA->PS),PS4
1	201364369	G	A	1-201364369-G-A	TNNT2	NM_001276345.2	c.418C>T_p.Arg140Cys	2	NSY	missense_variant	Ex11	NC_000001.11:g.201364369G>A	NC_000001.11(NM_001276345.2):c.418C>T	NP_001263274.1:p.(Arg140Cys)	PATHOGENIC	PM2_supporting,PP3_moderate,PP5,PS3(PP->PS),PS4	LP
1	201364366	G	A	1-201364366-G-A	TNNT2	NM_001276345.2	c.421C>T_p.Arg141Trp	2	NSY	missense_variant	Ex11	NC_000001.11:g.201364366G>A	NC_000001.11(NM_001276345.2):c.421C>T	NP_001263274.1:p.(Arg141Trp)	PATHOGENIC	PM2_supporting,PM5,PP3_moderate,PP5,PS3(PP->PS),PS4
1	201364357	G	A	1-201364357-G-A	TNNT2	NM_001276345.2	c.430C>T_p.Arg144Trp	2	NSY	missense_variant	Ex11	NC_000001.11:g.201364357G>A	NC_000001.11(NM_001276345.2):c.430C>T	NP_001263274.1:p.(Arg144Trp)	PATHOGENIC	PM2_supporting,PM5,PP3_moderate,PS3(PP->PS),PS4_supporting
1	201364341	C	T	1-201364341-C-T	TNNT2	NM_001276345.2	c.446G>A_p.Arg149His	2	NSY	missense_variant	Ex11	NC_000001.11:g.201364341C>T	NC_000001.11(NM_001276345.2):c.446G>A	NP_001263274.1:p.(Arg149His)	LIKELY_PATHOGENIC	PM2_supporting,PM5,PP3_moderate,PS4
1	201364335	C	T	1-201364335-C-T	TNNT2	NM_001276345.2	c.452G>A_p.Arg151Gln	2	NSY	missense_variant	Ex11	NC_000001.11:g.201364335C>T	NC_000001.11(NM_001276345.2):c.452G>A	NP_001263274.1:p.(Arg151Gln)	PATHOGENIC	PM2_supporting,PM5,PS3(NA->PS),PS4
1	201363349	G	A	1-201363349-G-A	TNNT2	NM_001276345.2	c.547C>T_p.Arg183Trp	2	NSY	missense_variant	Ex12	NC_000001.11:g.201363349G>A	NC_000001.11(NM_001276345.2):c.547C>T	NP_001263274.1:p.(Arg183Trp)	PATHOGENIC	PM2_supporting,PM5,PP3,PP5,PS3(PP->PS),PS4
1	201363376	TCTC	T	1-201363376-TCTC-T	TNNT2	NM_001276345.2	c.508GAG[4];[3]_p.Glu170[4];[3]	2	IF	inframe_deletion	Ex12	NC_000001.11:g.201363377_201363379del	NC_000001.11(NM_001276345.2):c.508GAG[4]%3B[3]	NP_001263274.1:p.(Glu170[4]%3B[3])	PATHOGENIC	PM2_supporting,PP5,BP3,PS3(PP->PS),PS4
15	63060899	G	A	15-63060899-G-A	TPM1	NM_001018005.2	c.523G>A_p.Asp175Asn	2	NSY	missense_variant	Ex5	NC_000015.10:g.63060899G>A	NC_000015.10(NM_001018005.2):c.523G>A	NP_001018005.1:p.(Asp175Asn)	PATHOGENIC	PM2_supporting,PP3_moderate,PP5,PS3(PP->PS),PS4	LP
15	63064133	T	C	15-63064133-T-C	TPM1	NM_001018005.2	c.842T>C_p.Met281Thr	2	NSY	missense_variant	Ex9	NC_000015.10:g.63064133T>C	NC_000015.10(NM_001018005.2):c.842T>C	NP_001018005.1:p.(Met281Thr)	LIKELY_PATHOGENIC	PM2_supporting,PP3_moderate,PP5,PS3_supporting(PP->PM),PS4
15	63061723	G	A	15-63061723-G-A	TPM1	NM_001018005.2	c.574G>A_p.Glu192Lys	2	NSY	missense_variant	Ex6	NC_000015.10:g.63061723G>A	NC_000015.10(NM_001018005.2):c.574G>A	NP_001018005.1:p.(Glu192Lys)	LIKELY_PATHOGENIC	PM2_supporting,PP5,PS3_supporting(PP->PM),PS4	P
2	178764527	CT	C	2-178764527-CT-C	TTN	NM_001267550.2	c.9987del_p.Val3330PhefsTer44	1	FS	splice_region_variant|frameshift_variant	Ex42	NC_000002.12:g.178764528del	NC_000002.12(NM_001267550.2):c.9987del	NP_001254479.2:p.(Val3330PhefsTer44)	LIKELY_PATHOGENIC	PVS1,PM2_supporting
2	178537649	A	AC	2-178537649-A-AC	TTN	NM_001267550.2	c.99557dup_p.Ser33186ArgfsTer2	1	FS	frameshift_variant	Ex355	NC_000002.12:g.178537649_178537650insC	NC_000002.12(NM_001267550.2):c.99557dup	NP_001254479.2:p.(Ser33186ArgfsTer2)	PATHOGENIC	PVS1,PM2_supporting,PP3
2	178538765	GT	G	2-178538765-GT-G	TTN	NM_001267550.2	c.99063del_p.Lys33021AsnfsTer40	1	FS	frameshift_variant	Ex354	NC_000002.12:g.178538766del	NC_000002.12(NM_001267550.2):c.99063del	NP_001254479.2:p.(Lys33021AsnfsTer40)	LIKELY_PATHOGENIC	PVS1,PM2_supporting,PP5
2	178538834	GT	G	2-178538834-GT-G	TTN	NM_001267550.2	c.98994del_p.Lys32998AsnfsTer63	1	FS	frameshift_variant	Ex354	NC_000002.12:g.178538835del	NC_000002.12(NM_001267550.2):c.98994del	NP_001254479.2:p.(Lys32998AsnfsTer63)	PATHOGENIC	PVS1,PM2_supporting,PP5,PS4_supporting
2	178539558	CGT	C	2-178539558-CGT-C	TTN	NM_001267550.2	c.98505_98506del_p.Glu32837SerfsTer3	1	FS	frameshift_variant	Ex352	NC_000002.12:g.178539559_178539560del	NC_000002.12(NM_001267550.2):c.98505_98506del	NP_001254479.2:p.(Glu32837SerfsTer3)	LIKELY_PATHOGENIC	PVS1,PM2_supporting
2	178539652	A	AT	2-178539652-A-AT	TTN	NM_001267550.2	c.98412dup_p.Tyr32805IlefsTer2	1	FS	frameshift_variant	Ex352	NC_000002.12:g.178539652_178539653insT	NC_000002.12(NM_001267550.2):c.98412dup	NP_001254479.2:p.(Tyr32805IlefsTer2)	LIKELY_PATHOGENIC	PVS1,PM2_supporting
2	178539765	CT	C	2-178539765-CT-C	TTN	NM_001267550.2	c.98299del_p.Arg32767GlyfsTer26	1	FS	frameshift_variant	Ex352	NC_000002.12:g.178539766del	NC_000002.12(NM_001267550.2):c.98299del	NP_001254479.2:p.(Arg32767GlyfsTer26)	PATHOGENIC	PVS1,PM2_supporting,PP5,PS4_moderate
2	178539764	CCT	C	2-178539764-CCT-C	TTN	NM_001267550.2	c.98299_98300del_p.Arg32767GlyfsTer2	1	FS	frameshift_variant	Ex352	NC_000002.12:g.178539765_178539766del	NC_000002.12(NM_001267550.2):c.98299_98300del	NP_001254479.2:p.(Arg32767GlyfsTer2)	PATHOGENIC	PVS1,PM2_supporting,PP5,PS4_moderate(BP->PS)
2	178541413	G	GTCACAGGTACTTTATTT	2-178541413-G-GTCACAGGTACTTTATTT	TTN	NM_001267550.2	c.97647_97663dup_p.Thr32555LysfsTer6	1	FS	frameshift_variant	Ex350	NC_000002.12:g.178541413_178541414insTCACAGGTACTTTATTT	NC_000002.12(NM_001267550.2):c.97647_97663dup	NP_001254479.2:p.(Thr32555LysfsTer6)	LIKELY_PATHOGENIC	PVS1,PM2_supporting,PP5
2	178542338	CG	C	2-178542338-CG-C	TTN	NM_001267550.2	c.97417del_p.Arg32473ValfsTer19	1	FS	frameshift_variant	Ex349	NC_000002.12:g.178542339del	NC_000002.12(NM_001267550.2):c.97417del	NP_001254479.2:p.(Arg32473ValfsTer19)	PATHOGENIC	PVS1,PM2_supporting,PP5,PS4_moderate
2	178542347	TACTC	T	2-178542347-TACTC-T	TTN	NM_001267550.2	c.97405_97408del_p.Glu32469MetfsTer22	1	FS	frameshift_variant	Ex349	NC_000002.12:g.178542348_178542351del	NC_000002.12(NM_001267550.2):c.97405_97408del	NP_001254479.2:p.(Glu32469MetfsTer22)	LIKELY_PATHOGENIC	PVS1,PM2_supporting,PP5
2	178542715	T	TCCGGTAA	2-178542715-T-TCCGGTAA	TTN	NM_001267550.2	c.97138_97139insTTACCGG_p.Glu32380ValfsTer16	1	FS	frameshift_variant	Ex348	NC_000002.12:g.178542715_178542716insCCGGTAA	NC_000002.12(NM_001267550.2):c.97138_97139insTTACCGG	NP_001254479.2:p.(Glu32380ValfsTer16)	LIKELY_PATHOGENIC	PVS1,PM2_supporting
2	178542723	G	GTA	2-178542723-G-GTA	TTN	NM_001267550.2	c.97129_97130dup_p.Leu32379HisfsTer4	1	FS	frameshift_variant	Ex348	NC_000002.12:g.178542723_178542724insTA	NC_000002.12(NM_001267550.2):c.97129_97130dup	NP_001254479.2:p.(Leu32379HisfsTer4)	PATHOGENIC	PVS1,PM2_supporting,PP5,PS4_moderate
2	178542718	AGTGTGTATTC	A	2-178542718-AGTGTGTATTC-A	TTN	NM_001267550.2	c.97126_97135del_p.Glu32376LeufsTer3	1	FS	frameshift_variant	Ex348	NC_000002.12:g.178542719_178542728del	NC_000002.12(NM_001267550.2):c.97126_97135del	NP_001254479.2:p.(Glu32376LeufsTer3)	LIKELY_PATHOGENIC	PVS1,PM2_supporting
2	178542739	C	CT	2-178542739-C-CT	TTN	NM_001267550.2	c.97114dup_p.Arg32372LysfsTer9	1	FS	frameshift_variant	Ex348	NC_000002.12:g.178542739_178542740insT	NC_000002.12(NM_001267550.2):c.97114dup	NP_001254479.2:p.(Arg32372LysfsTer9)	LIKELY_PATHOGENIC	PVS1,PM2_supporting,PP5
2	178542803	C	CT	2-178542803-C-CT	TTN	NM_001267550.2	c.97050dup_p.Glu32351ArgfsTer6	1	FS	frameshift_variant	Ex348	NC_000002.12:g.178542803_178542804insT	NC_000002.12(NM_001267550.2):c.97050dup	NP_001254479.2:p.(Glu32351ArgfsTer6)	PATHOGENIC	PVS1,PM2_supporting,PP5,PS4_supporting
2	178542807	TTC	T	2-178542807-TTC-T	TTN	NM_001267550.2	c.97045_97046del_p.Glu32349IlefsTer7	1	FS	frameshift_variant	Ex348	NC_000002.12:g.178542808_178542809del	NC_000002.12(NM_001267550.2):c.97045_97046del	NP_001254479.2:p.(Glu32349IlefsTer7)	LIKELY_PATHOGENIC	PVS1,PM2_supporting
2	178543288	CGTAGA	C	2-178543288-CGTAGA-C	TTN	NM_001267550.2	c.96680_96684del_p.Leu32227ArgfsTer4	1	FS	frameshift_variant	Ex347	NC_000002.12:g.178543289_178543293del	NC_000002.12(NM_001267550.2):c.96680_96684del	NP_001254479.2:p.(Leu32227ArgfsTer4)	LIKELY_PATHOGENIC	PVS1,PM2_supporting,PP5
2	178543293	AG	A	2-178543293-AG-A	TTN	NM_001267550.2	c.96679del_p.Leu32227SerfsTer24	1	FS	frameshift_variant	Ex347	NC_000002.12:g.178543294del	NC_000002.12(NM_001267550.2):c.96679del	NP_001254479.2:p.(Leu32227SerfsTer24)	PATHOGENIC	PVS1,PM2_supporting,PP5,PS4_supporting
2	178766490	CACTACAT	C	2-178766490-CACTACAT-C	TTN	NM_001267550.2	c.9587_9593del_p.Tyr3196TrpfsTer64	1	FS	frameshift_variant	Ex41	NC_000002.12:g.178766491_178766497del	NC_000002.12(NM_001267550.2):c.9587_9593del	NP_001254479.2:p.(Tyr3196TrpfsTer64)	LIKELY_PATHOGENIC	PVS1,PM2_supporting
2	178563282	C	T	2-178563282-C-T	TTN	NM_001267550.2	c.82850G>A_p.Trp27617Ter	1	SG	stop_gained	Ex326	NC_000002.12:g.178563282C>T	NC_000002.12(NM_001267550.2):c.82850G>A	NP_001254479.2:p.(Trp27617Ter)	LIKELY_PATHOGENIC	PVS1,PM2_supporting
2	178544399	A	AC	2-178544399-A-AC	TTN	NM_001267550.2	c.95829_95830insG_p.Tyr31944ValfsTer11	1	FS	frameshift_variant	Ex345	NC_000002.12:g.178544399_178544400insC	NC_000002.12(NM_001267550.2):c.95829_95830insG	NP_001254479.2:p.(Tyr31944ValfsTer11)	LIKELY_PATHOGENIC	PVS1,PM2_supporting,PP5
2	178528821	C	A	2-178528821-C-A	TTN	NM_001267550.2	c.106930G>T_p.Glu35644Ter	1	SG	stop_gained	Ex360	NC_000002.12:g.178528821C>A	NC_000002.12(NM_001267550.2):c.106930G>T	NP_001254479.2:p.(Glu35644Ter)	LIKELY_PATHOGENIC	PVS1,PM2_supporting
2	178773108	C	T	2-178773108-C-T	TTN	NM_001267550.2	c.7855+1G>A_p.?	1	ESS	splice_donor_variant	In33/34	NC_000002.12:g.178773108C>T	NC_000002.12(NM_001267550.2):c.7855+1G>A	NP_001254479.2:p.(?)	LIKELY_PATHOGENIC	PVS1,PM2_supporting
2	178773555	G	A	2-178773555-G-A	TTN	NM_001267550.2	c.7501C>T_p.Arg2501Ter	1	SG	stop_gained	Ex32	NC_000002.12:g.178773555G>A	NC_000002.12(NM_001267550.2):c.7501C>T	NP_001254479.2:p.(Arg2501Ter)	PATHOGENIC	PVS1,PM2_supporting,PP3,PP5,PS4_supporting
2	178533261	G	A	2-178533261-G-A	TTN	NM_001267550.2	c.103354C>T_p.Gln34452Ter	1	SG	stop_gained	Ex358	NC_000002.12:g.178533261G>A	NC_000002.12(NM_001267550.2):c.103354C>T	NP_001254479.2:p.(Gln34452Ter)	LIKELY_PATHOGENIC	PVS1,PM2_supporting,PP5
2	178611611	C	T	2-178611611-C-T	TTN	NM_001267550.2	c.50618G>A_p.Trp16873Ter	1	SG	stop_gained	Ex269	NC_000002.12:g.178611611C>T	NC_000002.12(NM_001267550.2):c.50618G>A	NP_001254479.2:p.(Trp16873Ter)	LIKELY_PATHOGENIC	PVS1,PM2_supporting,PP5
2	178766546	AC	A	2-178766546-AC-A	TTN	NM_001267550.2	c.9537del_p.Trp3179CysfsTer19	1	FS	frameshift_variant	Ex41	NC_000002.12:g.178766547del	NC_000002.12(NM_001267550.2):c.9537del	NP_001254479.2:p.(Trp3179CysfsTer19)	LIKELY_PATHOGENIC	PVS1,PM2_supporting
2	178531129	C	T	2-178531129-C-T	TTN	NM_001267550.2	c.105486G>A_p.Trp35162Ter	1	SG	stop_gained	Ex358	NC_000002.12:g.178531129C>T	NC_000002.12(NM_001267550.2):c.105486G>A	NP_001254479.2:p.(Trp35162Ter)	LIKELY_PATHOGENIC	PVS1,PM2_supporting,PP5
2	178546035	TC	T	2-178546035-TC-T	TTN	NM_001267550.2	c.95200del_p.Glu31734LysfsTer23	1	FS	frameshift_variant	Ex343	NC_000002.12:g.178546036del	NC_000002.12(NM_001267550.2):c.95200del	NP_001254479.2:p.(Glu31734LysfsTer23)	LIKELY_PATHOGENIC	PVS1,PM2_supporting,PP5
2	178620714	C	A	2-178620714-C-A	TTN	NM_001267550.2	c.45895+1G>T_p.?	1	ESS	splice_donor_variant	In247/248	NC_000002.12:g.178620714C>A	NC_000002.12(NM_001267550.2):c.45895+1G>T	NP_001254479.2:p.(?)	LIKELY_PATHOGENIC	PVS1,PM2_supporting,PP5
2	178559604	A	C	2-178559604-A-C	TTN	NM_001267550.2	c.86528T>G_p.Leu28843Ter	1	SG	stop_gained	Ex326	NC_000002.12:g.178559604A>C	NC_000002.12(NM_001267550.2):c.86528T>G	NP_001254479.2:p.(Leu28843Ter)	LIKELY_PATHOGENIC	PVS1,PM2_supporting,PP5
2	178767783	GA	G	2-178767783-GA-G	TTN	NM_001267550.2	c.9446del_p.Ile3149ThrfsTer49	1	FS	frameshift_variant	Ex40	NC_000002.12:g.178767784del	NC_000002.12(NM_001267550.2):c.9446del	NP_001254479.2:p.(Ile3149ThrfsTer49)	LIKELY_PATHOGENIC	PVS1,PM2_supporting
2	178621101	C	G	2-178621101-C-G	TTN	NM_001267550.2	c.45616+1G>C_p.?	1	ESS	splice_donor_variant	In246/247	NC_000002.12:g.178621101C>G	NC_000002.12(NM_001267550.2):c.45616+1G>C	NP_001254479.2:p.(?)	LIKELY_PATHOGENIC	PVS1,PM2_supporting,PP5
2	178529221	T	G	2-178529221-T-G	TTN	NM_001267550.2	c.106532-2A>C_p.?	1	ESS	splice_acceptor_variant	In359/360	NC_000002.12:g.178529221T>G	NC_000002.12(NM_001267550.2):c.106532-2A>C	NP_001254479.2:p.(?)	LIKELY_PATHOGENIC	PVS1,PM2_supporting,PP5
2	178581631	G	A	2-178581631-G-A	TTN	NM_001267550.2	c.66637C>T_p.Gln22213Ter	1	SG	stop_gained	Ex316	NC_000002.12:g.178581631G>A	NC_000002.12(NM_001267550.2):c.66637C>T	NP_001254479.2:p.(Gln22213Ter)	LIKELY_PATHOGENIC	PVS1,PM2_supporting,PP5
2	178547445	G	GCT	2-178547445-G-GCT	TTN	NM_001267550.2	c.94180_94181insAG_p.Pro31394GlnfsTer3	1	FS	frameshift_variant	Ex339	NC_000002.12:g.178547445_178547446insCT	NC_000002.12(NM_001267550.2):c.94180_94181insAG	NP_001254479.2:p.(Pro31394GlnfsTer3)	LIKELY_PATHOGENIC	PVS1,PM2_supporting
2	178566250	G	A	2-178566250-G-A	TTN	NM_001267550.2	c.79882C>T_p.Arg26628Ter	1	SG	stop_gained	Ex326	NC_000002.12:g.178566250G>A	NC_000002.12(NM_001267550.2):c.79882C>T	NP_001254479.2:p.(Arg26628Ter)	LIKELY_PATHOGENIC	PVS1,PM2_supporting,PP5
2	178547446	G	GCTAGA	2-178547446-G-GCTAGA	TTN	NM_001267550.2	c.94179_94180insTCTAG_p.Pro31394SerfsTer4	1	FS	frameshift_variant	Ex339	NC_000002.12:g.178547446_178547447insCTAGA	NC_000002.12(NM_001267550.2):c.94179_94180insTCTAG	NP_001254479.2:p.(Pro31394SerfsTer4)	LIKELY_PATHOGENIC	PVS1,PM2_supporting
2	178741320	C	T	2-178741320-C-T	TTN	NM_001267550.2	c.11913G>A_p.Trp3971Ter	1	SG	stop_gained	Ex48	NC_000002.12:g.178741320C>T	NC_000002.12(NM_001267550.2):c.11913G>A	NP_001254479.2:p.(Trp3971Ter)	LIKELY_PATHOGENIC	PVS1,PM2_supporting,PP5
2	178547466	TTC	T	2-178547466-TTC-T	TTN	NM_001267550.2	c.94158_94159del_p.Asn31387GlnfsTer16	1	FS	frameshift_variant	Ex339	NC_000002.12:g.178547467_178547468del	NC_000002.12(NM_001267550.2):c.94158_94159del	NP_001254479.2:p.(Asn31387GlnfsTer16)	LIKELY_PATHOGENIC	PVS1,PM2_supporting
2	178574530	G	A	2-178574530-G-A	TTN	NM_001267550.2	c.71602C>T_p.Arg23868Ter	1	SG	stop_gained	Ex326	NC_000002.12:g.178574530G>A	NC_000002.12(NM_001267550.2):c.71602C>T	NP_001254479.2:p.(Arg23868Ter)	PATHOGENIC	PVS1,PM2_supporting,PP5,PS4
2	178548460	G	A	2-178548460-G-A	TTN	NM_001267550.2	c.93166C>T_p.Arg31056Ter	1	SG	stop_gained	Ex339	NC_000002.12:g.178548460G>A	NC_000002.12(NM_001267550.2):c.93166C>T	NP_001254479.2:p.(Arg31056Ter)	PATHOGENIC	PVS1,PM2_supporting,PP5,PS4
2	178547518	CTTTAA	C	2-178547518-CTTTAA-C	TTN	NM_001267550.2	c.94103_94107del_p.Ile31368SerfsTer34	1	FS	frameshift_variant	Ex339	NC_000002.12:g.178547519_178547523del	NC_000002.12(NM_001267550.2):c.94103_94107del	NP_001254479.2:p.(Ile31368SerfsTer34)	PATHOGENIC	PVS1,PM2_supporting,PP5,PS4_supporting(BP->PM)
2	178539559	G	A	2-178539559-G-A	TTN	NM_001267550.2	c.98506C>T_p.Arg32836Ter	1	SG	stop_gained	Ex352	NC_000002.12:g.178539559G>A	NC_000002.12(NM_001267550.2):c.98506C>T	NP_001254479.2:p.(Arg32836Ter)	PATHOGENIC	PVS1,PM2_supporting,PP5,PS4
2	178547550	A	ACAAGCTGC	2-178547550-A-ACAAGCTGC	TTN	NM_001267550.2	c.94068_94075dup_p.Val31359GlyfsTer40	1	FS	frameshift_variant	Ex339	NC_000002.12:g.178547550_178547551insCAAGCTGC	NC_000002.12(NM_001267550.2):c.94068_94075dup	NP_001254479.2:p.(Val31359GlyfsTer40)	LIKELY_PATHOGENIC	PVS1,PM2_supporting
2	178587684	G	A	2-178587684-G-A	TTN	NM_001267550.2	c.63625C>T_p.Arg21209Ter	1	SG	stop_gained	Ex306	NC_000002.12:g.178587684G>A	NC_000002.12(NM_001267550.2):c.63625C>T	NP_001254479.2:p.(Arg21209Ter)	PATHOGENIC	PVS1,PM2_supporting,PP5,PS4
2	178563892	G	A	2-178563892-G-A	TTN	NM_001267550.2	c.82240C>T_p.Arg27414Ter	1	SG	stop_gained	Ex326	NC_000002.12:g.178563892G>A	NC_000002.12(NM_001267550.2):c.82240C>T	NP_001254479.2:p.(Arg27414Ter)	PATHOGENIC	PVS1,PM2_supporting,PP5,PS4
2	178587708	G	A	2-178587708-G-A	TTN	NM_001267550.2	c.63601C>T_p.Arg21201Ter	1	SG	stop_gained	Ex306	NC_000002.12:g.178587708G>A	NC_000002.12(NM_001267550.2):c.63601C>T	NP_001254479.2:p.(Arg21201Ter)	PATHOGENIC	PVS1,PM2_supporting,PP5,PS4
2	178607482	G	A	2-178607482-G-A	TTN	NM_001267550.2	c.53206C>T_p.Arg17736Ter	1	SG	stop_gained	Ex277	NC_000002.12:g.178607482G>A	NC_000002.12(NM_001267550.2):c.53206C>T	NP_001254479.2:p.(Arg17736Ter)	PATHOGENIC	PVS1,PM2_supporting,PP5,PS4
2	178535790	G	A	2-178535790-G-A	TTN	NM_001267550.2	c.100825C>T_p.Arg33609Ter	1	SG	stop_gained	Ex358	NC_000002.12:g.178535790G>A	NC_000002.12(NM_001267550.2):c.100825C>T	NP_001254479.2:p.(Arg33609Ter)	PATHOGENIC	PVS1,PM2_supporting,PP5,PS4
2	178599221	G	A	2-178599221-G-A	TTN	NM_001267550.2	c.56572C>T_p.Arg18858Ter	1	SG	stop_gained	Ex290	NC_000002.12:g.178599221G>A	NC_000002.12(NM_001267550.2):c.56572C>T	NP_001254479.2:p.(Arg18858Ter)	PATHOGENIC	PVS1,PM2_supporting,PP5,PS4
2	178571794	G	A	2-178571794-G-A	TTN	NM_001267550.2	c.74338C>T_p.Arg24780Ter	1	SG	stop_gained	Ex326	NC_000002.12:g.178571794G>A	NC_000002.12(NM_001267550.2):c.74338C>T	NP_001254479.2:p.(Arg24780Ter)	PATHOGENIC	PVS1,PM2_supporting,PP5,PS4
2	178616508	G	A	2-178616508-G-A	TTN	NM_001267550.2	c.48283C>T_p.Arg16095Ter	1	SG	stop_gained	Ex257	NC_000002.12:g.178616508G>A	NC_000002.12(NM_001267550.2):c.48283C>T	NP_001254479.2:p.(Arg16095Ter)	PATHOGENIC	PVS1,PM2_supporting,PP5,PS4
2	178572286	G	A	2-178572286-G-A	TTN	NM_001267550.2	c.73846C>T_p.Arg24616Ter	1	SG	stop_gained	Ex326	NC_000002.12:g.178572286G>A	NC_000002.12(NM_001267550.2):c.73846C>T	NP_001254479.2:p.(Arg24616Ter)	PATHOGENIC	PVS1,PM2_supporting,PP5,PS4
2	178529959	C	T	2-178529959-C-T	TTN	NM_001267550.2	c.106531+1G>A_p.?	1	ESS	splice_donor_variant	In359/360	NC_000002.12:g.178529959C>T	NC_000002.12(NM_001267550.2):c.106531+1G>A	NP_001254479.2:p.(?)	PATHOGENIC	PVS1,PM2_supporting,PP5,PS4
2	178532670	G	A	2-178532670-G-A	TTN	NM_001267550.2	c.103945C>T_p.Arg34649Ter	1	SG	stop_gained	Ex358	NC_000002.12:g.178532670G>A	NC_000002.12(NM_001267550.2):c.103945C>T	NP_001254479.2:p.(Arg34649Ter)	LIKELY_PATHOGENIC	PVS1,PM2_supporting,PP5,PS4_NA(BP->PP)
2	178547907	CTGAT	C	2-178547907-CTGAT-C	TTN	NM_001267550.2	c.93715_93718del_p.Ile31239ValfsTer8	1	FS	frameshift_variant	Ex339	NC_000002.12:g.178547908_178547911del	NC_000002.12(NM_001267550.2):c.93715_93718del	NP_001254479.2:p.(Ile31239ValfsTer8)	LIKELY_PATHOGENIC	PVS1,PM2_supporting
2	178547925	G	GCT	2-178547925-G-GCT	TTN	NM_001267550.2	c.93700_93701insAG_p.Thr31234LysfsTer15	1	FS	frameshift_variant	Ex339	NC_000002.12:g.178547925_178547926insCT	NC_000002.12(NM_001267550.2):c.93700_93701insAG	NP_001254479.2:p.(Thr31234LysfsTer15)	LIKELY_PATHOGENIC	PVS1,PM2_supporting
2	178528797	G	A	2-178528797-G-A	TTN	NM_001267550.2	c.106954C>T_p.Arg35652Ter	1	SG	stop_gained	Ex360	NC_000002.12:g.178528797G>A	NC_000002.12(NM_001267550.2):c.106954C>T	NP_001254479.2:p.(Arg35652Ter)	LIKELY_PATHOGENIC	PVS1,PM2_supporting,PP5,PS4_NA(BP->PP)
2	178547948	AG	A	2-178547948-AG-A	TTN	NM_001267550.2	c.93677del_p.Thr31226IlefsTer22	1	FS	frameshift_variant	Ex339	NC_000002.12:g.178547949del	NC_000002.12(NM_001267550.2):c.93677del	NP_001254479.2:p.(Thr31226IlefsTer22)	LIKELY_PATHOGENIC	PVS1,PM2_supporting
2	178619714	G	A	2-178619714-G-A	TTN	NM_001267550.2	c.46603C>T_p.Arg15535Ter	1	SG	stop_gained	Ex250	NC_000002.12:g.178619714G>A	NC_000002.12(NM_001267550.2):c.46603C>T	NP_001254479.2:p.(Arg15535Ter)	LIKELY_PATHOGENIC	PVS1,PM2_supporting,PP5,PS4_NA(BP->PP)
2	178548457	CT	C	2-178548457-CT-C	TTN	NM_001267550.2	c.93168del_p.Glu31057ArgfsTer37	1	FS	frameshift_variant	Ex339	NC_000002.12:g.178548458del	NC_000002.12(NM_001267550.2):c.93168del	NP_001254479.2:p.(Glu31057ArgfsTer37)	LIKELY_PATHOGENIC	PVS1,PM2_supporting,PP5
2	178548491	AC	A	2-178548491-AC-A	TTN	NM_001267550.2	c.93134del_p.Gly31045ValfsTer9	1	FS	frameshift_variant	Ex339	NC_000002.12:g.178548492del	NC_000002.12(NM_001267550.2):c.93134del	NP_001254479.2:p.(Gly31045ValfsTer9)	LIKELY_PATHOGENIC	PVS1,PM2_supporting
2	178532844	G	A	2-178532844-G-A	TTN	NM_001267550.2	c.103771C>T_p.Arg34591Ter	1	SG	stop_gained	Ex358	NC_000002.12:g.178532844G>A	NC_000002.12(NM_001267550.2):c.103771C>T	NP_001254479.2:p.(Arg34591Ter)	PATHOGENIC	PVS1,PM2_supporting,PP5,PS4_moderate
2	178569478	G	A	2-178569478-G-A	TTN	NM_001267550.2	c.76654C>T_p.Arg25552Ter	1	SG	stop_gained	Ex326	NC_000002.12:g.178569478G>A	NC_000002.12(NM_001267550.2):c.76654C>T	NP_001254479.2:p.(Arg25552Ter)	PATHOGENIC	PVS1,PM2_supporting,PP5,PS4_moderate
2	178569267	C	T	2-178569267-C-T	TTN	NM_001267550.2	c.76865G>A_p.Trp25622Ter	1	SG	stop_gained	Ex326	NC_000002.12:g.178569267C>T	NC_000002.12(NM_001267550.2):c.76865G>A	NP_001254479.2:p.(Trp25622Ter)	PATHOGENIC	PVS1,PM2_supporting,PP5,PS4_moderate
2	178584552	G	A	2-178584552-G-A	TTN	NM_001267550.2	c.64999C>T_p.Arg21667Ter	1	SG	stop_gained	Ex311	NC_000002.12:g.178584552G>A	NC_000002.12(NM_001267550.2):c.64999C>T	NP_001254479.2:p.(Arg21667Ter)	PATHOGENIC	PVS1,PM2_supporting,PP5,PS4_moderate
2	178565416	G	A	2-178565416-G-A	TTN	NM_001267550.2	c.80716C>T_p.Arg26906Ter	1	SG	stop_gained	Ex326	NC_000002.12:g.178565416G>A	NC_000002.12(NM_001267550.2):c.80716C>T	NP_001254479.2:p.(Arg26906Ter)	PATHOGENIC	PVS1,PM2_supporting,PP5,PS4_moderate
2	178558419	G	A	2-178558419-G-A	TTN	NM_001267550.2	c.87040C>T_p.Arg29014Ter	1	SG	stop_gained	Ex327	NC_000002.12:g.178558419G>A	NC_000002.12(NM_001267550.2):c.87040C>T	NP_001254479.2:p.(Arg29014Ter)	PATHOGENIC	PVS1,PM2_supporting,PP5,PS4_moderate
2	178613158	TA	T	2-178613158-TA-T	TTN	NM_001267550.2	c.49648+2del_p.?	1	ESS	splice_donor_variant	In264/265	NC_000002.12:g.178613159del	NC_000002.12(NM_001267550.2):c.49648+2del	NP_001254479.2:p.(?)	PATHOGENIC	PVS1,PM2_supporting,PP5,PS4_moderate
2	178543276	G	A	2-178543276-G-A	TTN	NM_001267550.2	c.96697C>T_p.Arg32233Ter	1	SG	stop_gained	Ex347	NC_000002.12:g.178543276G>A	NC_000002.12(NM_001267550.2):c.96697C>T	NP_001254479.2:p.(Arg32233Ter)	PATHOGENIC	PVS1,PM2_supporting,PP5,PS4_moderate
2	178546323	G	A	2-178546323-G-A	TTN	NM_001267550.2	c.95008C>T_p.Arg31670Ter	1	SG	stop_gained	Ex342	NC_000002.12:g.178546323G>A	NC_000002.12(NM_001267550.2):c.95008C>T	NP_001254479.2:p.(Arg31670Ter)	PATHOGENIC	PVS1,PM2_supporting,PP5,PS4_moderate
2	178609289	G	A	2-178609289-G-A	TTN	NM_001267550.2	c.52021C>T_p.Arg17341Ter	1	SG	stop_gained	Ex273	NC_000002.12:g.178609289G>A	NC_000002.12(NM_001267550.2):c.52021C>T	NP_001254479.2:p.(Arg17341Ter)	PATHOGENIC	PVS1,PM2_supporting,PP5,PS4_moderate
2	178548994	T	TC	2-178548994-T-TC	TTN	NM_001267550.2	c.92631dup_p.Lys30878GlufsTer8	1	FS	frameshift_variant	Ex339	NC_000002.12:g.178548994_178548995insC	NC_000002.12(NM_001267550.2):c.92631dup	NP_001254479.2:p.(Lys30878GlufsTer8)	LIKELY_PATHOGENIC	PVS1,PM2_supporting,PP5
2	178534092	G	A	2-178534092-G-A	TTN	NM_001267550.2	c.102523C>T_p.Arg34175Ter	1	SG	stop_gained	Ex358	NC_000002.12:g.178534092G>A	NC_000002.12(NM_001267550.2):c.102523C>T	NP_001254479.2:p.(Arg34175Ter)	PATHOGENIC	PVS1,PM2_supporting,PP5,PS4_moderate
2	178634567	G	A	2-178634567-G-A	TTN	NM_001267550.2	c.42214C>T_p.Arg14072Ter	1	SG	stop_gained	Ex230	NC_000002.12:g.178634567G>A	NC_000002.12(NM_001267550.2):c.42214C>T	NP_001254479.2:p.(Arg14072Ter)	PATHOGENIC	PVS1,PM2_supporting,PP5,PS4_moderate
2	178559309	A	T	2-178559309-A-T	TTN	NM_001267550.2	c.86821+2T>A_p.?	1	ESS	splice_donor_variant	In326/327	NC_000002.12:g.178559309A>T	NC_000002.12(NM_001267550.2):c.86821+2T>A	NP_001254479.2:p.(?)	PATHOGENIC	PVS1,PM2_supporting,PP5,PS4_moderate(BP->PS)
2	178549008	G	GCATT	2-178549008-G-GCATT	TTN	NM_001267550.2	c.92614_92617dup_p.Ala30873GlufsTer14	1	FS	frameshift_variant	Ex339	NC_000002.12:g.178549008_178549009insCATT	NC_000002.12(NM_001267550.2):c.92614_92617dup	NP_001254479.2:p.(Ala30873GlufsTer14)	LIKELY_PATHOGENIC	PVS1,PM2_supporting
2	178585291	G	A	2-178585291-G-A	TTN	NM_001267550.2	c.64453C>T_p.Arg21485Ter	1	SG	stop_gained	Ex309	NC_000002.12:g.178585291G>A	NC_000002.12(NM_001267550.2):c.64453C>T	NP_001254479.2:p.(Arg21485Ter)	PATHOGENIC	PVS1,PM2_supporting,PP5,PS4_moderate(BP->PS)
2	178579702	G	A	2-178579702-G-A	TTN	NM_001267550.2	c.67495C>T_p.Arg22499Ter	1	SG	stop_gained	Ex319	NC_000002.12:g.178579702G>A	NC_000002.12(NM_001267550.2):c.67495C>T	NP_001254479.2:p.(Arg22499Ter)	PATHOGENIC	PVS1,PM2_supporting,PP5,PS4_moderate(BP->PS)
2	178604035	G	A	2-178604035-G-A	TTN	NM_001267550.2	c.54652C>T_p.Arg18218Ter	1	SG	stop_gained	Ex282	NC_000002.12:g.178604035G>A	NC_000002.12(NM_001267550.2):c.54652C>T	NP_001254479.2:p.(Arg18218Ter)	PATHOGENIC	PVS1,PM2_supporting,PP5,PS4_supporting
2	178630923	G	A	2-178630923-G-A	TTN	NM_001267550.2	c.44035C>T_p.Arg14679Ter	1	SG	stop_gained	Ex238	NC_000002.12:g.178630923G>A	NC_000002.12(NM_001267550.2):c.44035C>T	NP_001254479.2:p.(Arg14679Ter)	PATHOGENIC	PVS1,PM2_supporting,PP5,PS4_supporting
2	178530861	G	A	2-178530861-G-A	TTN	NM_001267550.2	c.105754C>T_p.Arg35252Ter	1	SG	stop_gained	Ex358	NC_000002.12:g.178530861G>A	NC_000002.12(NM_001267550.2):c.105754C>T	NP_001254479.2:p.(Arg35252Ter)	PATHOGENIC	PVS1,PM2_supporting,PP5,PS4_supporting
2	178590992	G	A	2-178590992-G-A	TTN	NM_001267550.2	c.60733C>T_p.Arg20245Ter	1	SG	stop_gained	Ex304	NC_000002.12:g.178590992G>A	NC_000002.12(NM_001267550.2):c.60733C>T	NP_001254479.2:p.(Arg20245Ter)	PATHOGENIC	PVS1,PM2_supporting,PP5,PS4_supporting
2	178740491	G	A	2-178740491-G-A	TTN	NM_001267550.2	c.12742C>T_p.Gln4248Ter	1	SG	stop_gained	Ex48	NC_000002.12:g.178740491G>A	NC_000002.12(NM_001267550.2):c.12742C>T	NP_001254479.2:p.(Gln4248Ter)	PATHOGENIC	PVS1,PM2_supporting,PP5,PS4_supporting
2	178603875	C	T	2-178603875-C-T	TTN	NM_001267550.2	c.54811+1G>A_p.?	1	ESS	splice_donor_variant	In282/283	NC_000002.12:g.178603875C>T	NC_000002.12(NM_001267550.2):c.54811+1G>A	NP_001254479.2:p.(?)	PATHOGENIC	PVS1,PM2_supporting,PP5,PS4_supporting
2	178568947	T	A	2-178568947-T-A	TTN	NM_001267550.2	c.77185A>T_p.Lys25729Ter	1	SG	stop_gained	Ex326	NC_000002.12:g.178568947T>A	NC_000002.12(NM_001267550.2):c.77185A>T	NP_001254479.2:p.(Lys25729Ter)	PATHOGENIC	PVS1,PM2_supporting,PP5,PS4_supporting
2	178604269	G	A	2-178604269-G-A	TTN	NM_001267550.2	c.54418C>T_p.Arg18140Ter	1	SG	stop_gained	Ex282	NC_000002.12:g.178604269G>A	NC_000002.12(NM_001267550.2):c.54418C>T	NP_001254479.2:p.(Arg18140Ter)	PATHOGENIC	PVS1,PM2_supporting,PP5,PS4_supporting
2	178560016	G	A	2-178560016-G-A	TTN	NM_001267550.2	c.86116C>T_p.Arg28706Ter	1	SG	stop_gained	Ex326	NC_000002.12:g.178560016G>A	NC_000002.12(NM_001267550.2):c.86116C>T	NP_001254479.2:p.(Arg28706Ter)	PATHOGENIC	PVS1,PM2_supporting,PP5,PS4_supporting
2	178549110	CT	C	2-178549110-CT-C	TTN	NM_001267550.2	c.92515del_p.Ser30839AlafsTer2	1	FS	frameshift_variant	Ex339	NC_000002.12:g.178549111del	NC_000002.12(NM_001267550.2):c.92515del	NP_001254479.2:p.(Ser30839AlafsTer2)	LIKELY_PATHOGENIC	PVS1,PM2_supporting
2	178535508	G	A	2-178535508-G-A	TTN	NM_001267550.2	c.101107C>T_p.Arg33703Ter	1	SG	stop_gained	Ex358	NC_000002.12:g.178535508G>A	NC_000002.12(NM_001267550.2):c.101107C>T	NP_001254479.2:p.(Arg33703Ter)	PATHOGENIC	PVS1,PM2_supporting,PP5,PS4_supporting
2	178549309	G	A	2-178549309-G-A	TTN	NM_001267550.2	c.92317C>T_p.Arg30773Ter	1	SG	stop_gained	Ex339	NC_000002.12:g.178549309G>A	NC_000002.12(NM_001267550.2):c.92317C>T	NP_001254479.2:p.(Arg30773Ter)	PATHOGENIC	PVS1,PM2_supporting,PP5,PS4_supporting
2	178779999	C	T	2-178779999-C-T	TTN	NM_001267550.2	c.3729+1G>A_p.?	1	ESS	splice_donor_variant	In22/23	NC_000002.12:g.178779999C>T	NC_000002.12(NM_001267550.2):c.3729+1G>A	NP_001254479.2:p.(?)	PATHOGENIC	PVS1,PM2_supporting,PP5,PS4_supporting
2	178612851	G	A	2-178612851-G-A	TTN	NM_001267550.2	c.49870C>T_p.Arg16624Ter	1	SG	stop_gained	Ex265	NC_000002.12:g.178612851G>A	NC_000002.12(NM_001267550.2):c.49870C>T	NP_001254479.2:p.(Arg16624Ter)	PATHOGENIC	PVS1,PM2_supporting,PP5,PS4_supporting
2	178616728	C	G	2-178616728-C-G	TTN	NM_001267550.2	c.48160+1G>C_p.?	1	ESS	splice_donor_variant	In256/257	NC_000002.12:g.178616728C>G	NC_000002.12(NM_001267550.2):c.48160+1G>C	NP_001254479.2:p.(?)	PATHOGENIC	PVS1,PM2_supporting,PP5,PS4_supporting
2	178600932	G	A	2-178600932-G-A	TTN	NM_001267550.2	c.55972C>T_p.Arg18658Ter	1	SG	stop_gained	Ex288	NC_000002.12:g.178600932G>A	NC_000002.12(NM_001267550.2):c.55972C>T	NP_001254479.2:p.(Arg18658Ter)	PATHOGENIC	PVS1,PM2_supporting,PP5,PS4_supporting
2	178609207	C	T	2-178609207-C-T	TTN	NM_001267550.2	c.52102+1G>A_p.?	1	ESS	splice_donor_variant	In273/274	NC_000002.12:g.178609207C>T	NC_000002.12(NM_001267550.2):c.52102+1G>A	NP_001254479.2:p.(?)	PATHOGENIC	PVS1,PM2_supporting,PP5,PS4_supporting
2	178549132	CT	C	2-178549132-CT-C	TTN	NM_001267550.2	c.92493del_p.Asp30832ThrfsTer7	1	FS	frameshift_variant	Ex339	NC_000002.12:g.178549133del	NC_000002.12(NM_001267550.2):c.92493del	NP_001254479.2:p.(Asp30832ThrfsTer7)	LIKELY_PATHOGENIC	PVS1,PM2_supporting,PP5
2	178566838	G	A	2-178566838-G-A	TTN	NM_001267550.2	c.79294C>T_p.Arg26432Ter	1	SG	stop_gained	Ex326	NC_000002.12:g.178566838G>A	NC_000002.12(NM_001267550.2):c.79294C>T	NP_001254479.2:p.(Arg26432Ter)	PATHOGENIC	PVS1,PM2_supporting,PP5,PS4_supporting
2	178592545	C	T	2-178592545-C-T	TTN	NM_001267550.2	c.59460G>A_p.Trp19820Ter	1	SG	stop_gained	Ex301	NC_000002.12:g.178592545C>T	NC_000002.12(NM_001267550.2):c.59460G>A	NP_001254479.2:p.(Trp19820Ter)	PATHOGENIC	PVS1,PM2_supporting,PP5,PS4_supporting
2	178549243	CATGGA	C	2-178549243-CATGGA-C	TTN	NM_001267550.2	c.92378_92382del_p.Phe30793CysfsTer4	1	FS	frameshift_variant	Ex339	NC_000002.12:g.178549244_178549248del	NC_000002.12(NM_001267550.2):c.92378_92382del	NP_001254479.2:p.(Phe30793CysfsTer4)	LIKELY_PATHOGENIC	PVS1,PM2_supporting
2	178612115	G	A	2-178612115-G-A	TTN	NM_001267550.2	c.50296C>T_p.Arg16766Ter	1	SG	stop_gained	Ex267	NC_000002.12:g.178612115G>A	NC_000002.12(NM_001267550.2):c.50296C>T	NP_001254479.2:p.(Arg16766Ter)	PATHOGENIC	PVS1,PM2_supporting,PP5,PS4_supporting
2	178617839	G	A	2-178617839-G-A	TTN	NM_001267550.2	c.47512C>T_p.Arg15838Ter	1	SG	stop_gained	Ex253	NC_000002.12:g.178617839G>A	NC_000002.12(NM_001267550.2):c.47512C>T	NP_001254479.2:p.(Arg15838Ter)	PATHOGENIC	PVS1,PM2_supporting,PP5,PS4_supporting
2	178553913	C	G	2-178553913-C-G	TTN	NM_001267550.2	c.89197+1G>C_p.?	1	ESS	splice_donor_variant	In333/334	NC_000002.12:g.178553913C>G	NC_000002.12(NM_001267550.2):c.89197+1G>C	NP_001254479.2:p.(?)	PATHOGENIC	PVS1,PM2_supporting,PP5,PS4_supporting
2	178549282	CTT	C	2-178549282-CTT-C	TTN	NM_001267550.2	c.92342_92343del_p.Lys30781SerfsTer9	1	FS	frameshift_variant	Ex339	NC_000002.12:g.178549283_178549284del	NC_000002.12(NM_001267550.2):c.92342_92343del	NP_001254479.2:p.(Lys30781SerfsTer9)	LIKELY_PATHOGENIC	PVS1,PM2_supporting
2	178560865	G	A	2-178560865-G-A	TTN	NM_001267550.2	c.85267C>T_p.Arg28423Ter	1	SG	stop_gained	Ex326	NC_000002.12:g.178560865G>A	NC_000002.12(NM_001267550.2):c.85267C>T	NP_001254479.2:p.(Arg28423Ter)	PATHOGENIC	PVS1,PM2_supporting,PP5,PS4_supporting(BP->PM)
2	178575970	G	A	2-178575970-G-A	TTN	NM_001267550.2	c.70162C>T_p.Arg23388Ter	1	SG	stop_gained	Ex326	NC_000002.12:g.178575970G>A	NC_000002.12(NM_001267550.2):c.70162C>T	NP_001254479.2:p.(Arg23388Ter)	PATHOGENIC	PVS1,PM2_supporting,PP5,PS4_supporting(BP->PM)
2	178617857	G	A	2-178617857-G-A	TTN	NM_001267550.2	c.47494C>T_p.Arg15832Ter	1	SG	stop_gained	Ex253	NC_000002.12:g.178617857G>A	NC_000002.12(NM_001267550.2):c.47494C>T	NP_001254479.2:p.(Arg15832Ter)	PATHOGENIC	PVS1,PM2_supporting,PP5,PS4_supporting(BP->PM)
2	178609756	G	A	2-178609756-G-A	TTN	NM_001267550.2	c.51667C>T_p.Arg17223Ter	1	SG	stop_gained	Ex272	NC_000002.12:g.178609756G>A	NC_000002.12(NM_001267550.2):c.51667C>T	NP_001254479.2:p.(Arg17223Ter)	PATHOGENIC	PVS1,PM2_supporting,PP5,PS4_supporting(BP->PM)
2	178579850	T	G	2-178579850-T-G	TTN	NM_001267550.2	c.67349-2A>C_p.?	1	ESS	splice_acceptor_variant	In318/319	NC_000002.12:g.178579850T>G	NC_000002.12(NM_001267550.2):c.67349-2A>C	NP_001254479.2:p.(?)	PATHOGENIC	PVS1,PM2_supporting,PP5,PS4_supporting(BP->PM)
2	178549337	G	GCTTTT	2-178549337-G-GCTTTT	TTN	NM_001267550.2	c.92284_92288dup_p.Ser30763ArgfsTer7	1	FS	frameshift_variant	Ex339	NC_000002.12:g.178549337_178549338insCTTTT	NC_000002.12(NM_001267550.2):c.92284_92288dup	NP_001254479.2:p.(Ser30763ArgfsTer7)	PATHOGENIC	PVS1,PM2_supporting,PS4_moderate
2	178758982	A	G	2-178758982-A-G	TTN	NM_001267550.2	c.10303+2T>C_p.?	1	ESS	splice_donor_variant	In44/45	NC_000002.12:g.178758982A>G	NC_000002.12(NM_001267550.2):c.10303+2T>C	NP_001254479.2:p.(?)	PATHOGENIC	PVS1,PM2_supporting,PS4
2	178630240	C	T	2-178630240-C-T	TTN	NM_001267550.2	c.44281+1G>A_p.?	1	ESS	splice_donor_variant	In239/240	NC_000002.12:g.178630240C>T	NC_000002.12(NM_001267550.2):c.44281+1G>A	NP_001254479.2:p.(?)	PATHOGENIC	PVS1,PM2_supporting,PS4
2	178605011	G	A	2-178605011-G-A	TTN	NM_001267550.2	c.54166C>T_p.Arg18056Ter	1	SG	stop_gained	Ex280	NC_000002.12:g.178605011G>A	NC_000002.12(NM_001267550.2):c.54166C>T	NP_001254479.2:p.(Arg18056Ter)	PATHOGENIC	PVS1,PM2_supporting,PS4
2	178549731	CT	C	2-178549731-CT-C	TTN	NM_001267550.2	c.91990del_p.Arg30664AspfsTer6	1	FS	frameshift_variant	Ex338	NC_000002.12:g.178549732del	NC_000002.12(NM_001267550.2):c.91990del	NP_001254479.2:p.(Arg30664AspfsTer6)	PATHOGENIC	PVS1,PM2_supporting,PS4_supporting
2	178579938	C	T	2-178579938-C-T	TTN	NM_001267550.2	c.67348+1G>A_p.?	1	ESS	splice_donor_variant	In318/319	NC_000002.12:g.178579938C>T	NC_000002.12(NM_001267550.2):c.67348+1G>A	NP_001254479.2:p.(?)	LIKELY_PATHOGENIC	PVS1,PM2_supporting,PS4_NA(BP->PP)
2	178640539	AC	A	2-178640539-AC-A	TTN	NM_001267550.2	c.40723+1del_p.?	1	ESS	splice_donor_variant	In221/222	NC_000002.12:g.178640540del	NC_000002.12(NM_001267550.2):c.40723+1del	NP_001254479.2:p.(?)	LIKELY_PATHOGENIC	PVS1,PM2_supporting,PS4_NA(BP->PP)
2	178549808	A	AAGAT	2-178549808-A-AAGAT	TTN	NM_001267550.2	c.91913_91914insATCT_p.Leu30639SerfsTer10	1	FS	frameshift_variant	Ex338	NC_000002.12:g.178549808_178549809insAGAT	NC_000002.12(NM_001267550.2):c.91913_91914insATCT	NP_001254479.2:p.(Leu30639SerfsTer10)	LIKELY_PATHOGENIC	PVS1,PM2_supporting
2	178549811	C	CT	2-178549811-C-CT	TTN	NM_001267550.2	c.91910_91911insA_p.Met30637IlefsTer11	1	FS	frameshift_variant	Ex338	NC_000002.12:g.178549811_178549812insT	NC_000002.12(NM_001267550.2):c.91910_91911insA	NP_001254479.2:p.(Met30637IlefsTer11)	LIKELY_PATHOGENIC	PVS1,PM2_supporting
2	178594198	G	A	2-178594198-G-A	TTN	NM_001267550.2	c.58195C>T_p.Arg19399Ter	1	SG	stop_gained	Ex297	NC_000002.12:g.178594198G>A	NC_000002.12(NM_001267550.2):c.58195C>T	NP_001254479.2:p.(Arg19399Ter)	LIKELY_PATHOGENIC	PVS1,PM2_supporting,PS4_NA(BP->PP)
2	178767782	G	A	2-178767782-G-A	TTN	NM_001267550.2	c.9448C>T_p.Arg3150Ter	1	SG	stop_gained	Ex40	NC_000002.12:g.178767782G>A	NC_000002.12(NM_001267550.2):c.9448C>T	NP_001254479.2:p.(Arg3150Ter)	LIKELY_PATHOGENIC	PVS1,PM2_supporting,PS4_NA(BP->PP)
2	178549998	C	CT	2-178549998-C-CT	TTN	NM_001267550.2	c.91839dup_p.Val30614SerfsTer34	1	FS	frameshift_variant	Ex337	NC_000002.12:g.178549998_178549999insT	NC_000002.12(NM_001267550.2):c.91839dup	NP_001254479.2:p.(Val30614SerfsTer34)	LIKELY_PATHOGENIC	PVS1,PM2_supporting,PP5
2	178550122	A	AT	2-178550122-A-AT	TTN	NM_001267550.2	c.91715dup_p.Asn30572LysfsTer16	1	FS	frameshift_variant	Ex337	NC_000002.12:g.178550122_178550123insT	NC_000002.12(NM_001267550.2):c.91715dup	NP_001254479.2:p.(Asn30572LysfsTer16)	PATHOGENIC	PVS1,PM2_supporting,PS4_moderate
2	178774206	C	T	2-178774206-C-T	TTN	NM_001267550.2	c.7057+1G>A_p.?	1	ESS	splice_donor_variant	In30/31	NC_000002.12:g.178774206C>T	NC_000002.12(NM_001267550.2):c.7057+1G>A	NP_001254479.2:p.(?)	LIKELY_PATHOGENIC	PVS1,PM2_supporting,PS4_NA(BP->PP)
2	178610089	C	T	2-178610089-C-T	TTN	NM_001267550.2	c.51436+1G>A_p.?	1	ESS	splice_donor_variant	In271/272	NC_000002.12:g.178610089C>T	NC_000002.12(NM_001267550.2):c.51436+1G>A	NP_001254479.2:p.(?)	PATHOGENIC	PVS1,PM2_supporting,PS4_moderate
2	178551129	A	AG	2-178551129-A-AG	TTN	NM_001267550.2	c.91401dup_p.Trp30468LeufsTer8	1	FS	frameshift_variant	Ex336	NC_000002.12:g.178551129_178551130insG	NC_000002.12(NM_001267550.2):c.91401dup	NP_001254479.2:p.(Trp30468LeufsTer8)	LIKELY_PATHOGENIC	PVS1,PM2_supporting
2	178740646	G	T	2-178740646-G-T	TTN	NM_001267550.2	c.12587C>A_p.Ser4196Ter	1	SG	stop_gained	Ex48	NC_000002.12:g.178740646G>T	NC_000002.12(NM_001267550.2):c.12587C>A	NP_001254479.2:p.(Ser4196Ter)	PATHOGENIC	PVS1,PM2_supporting,PS4_moderate
2	178552478	A	ACTTGTGC	2-178552478-A-ACTTGTGC	TTN	NM_001267550.2	c.90415_90421dup_p.Val30141GlyfsTer14	1	FS	frameshift_variant	Ex335	NC_000002.12:g.178552478_178552479insCTTGTGC	NC_000002.12(NM_001267550.2):c.90415_90421dup	NP_001254479.2:p.(Val30141GlyfsTer14)	LIKELY_PATHOGENIC	PVS1,PM2_supporting,PP5
2	178768798	TTG	T	2-178768798-TTG-T	TTN	NM_001267550.2	c.9036_9037del_p.Asp3012GlufsTer25	1	FS	frameshift_variant	Ex38	NC_000002.12:g.178768799_178768800del	NC_000002.12(NM_001267550.2):c.9036_9037del	NP_001254479.2:p.(Asp3012GlufsTer25)	LIKELY_PATHOGENIC	PVS1,PM2_supporting
2	178552809	G	GT	2-178552809-G-GT	TTN	NM_001267550.2	c.90090dup_p.Pro30031ThrfsTer6	1	FS	frameshift_variant	Ex335	NC_000002.12:g.178552809_178552810insT	NC_000002.12(NM_001267550.2):c.90090dup	NP_001254479.2:p.(Pro30031ThrfsTer6)	LIKELY_PATHOGENIC	PVS1,PM2_supporting
2	178622768	C	T	2-178622768-C-T	TTN	NM_001267550.2	c.44816-1G>A_p.?	1	ESS	splice_acceptor_variant	In242/243	NC_000002.12:g.178622768C>T	NC_000002.12(NM_001267550.2):c.44816-1G>A	NP_001254479.2:p.(?)	PATHOGENIC	PVS1,PM2_supporting,PS4_supporting
2	178769678	C	T	2-178769678-C-T	TTN	NM_001267550.2	c.8902+1G>A_p.?	1	ESS	splice_donor_variant	In37/38	NC_000002.12:g.178769678C>T	NC_000002.12(NM_001267550.2):c.8902+1G>A	NP_001254479.2:p.(?)	PATHOGENIC	PVS1,PM2_supporting,PS4_supporting
2	178738361	C	T	2-178738361-C-T	TTN	NM_001267550.2	c.14093-1G>A_p.?	1	ESS	splice_acceptor_variant	In48/49	NC_000002.12:g.178738361C>T	NC_000002.12(NM_001267550.2):c.14093-1G>A	NP_001254479.2:p.(?)	PATHOGENIC	PVS1,PM2_supporting,PS4_supporting
2	178552811	AC	A	2-178552811-AC-A	TTN	NM_001267550.2	c.90088del_p.Val30030TyrfsTer10	1	FS	frameshift_variant	Ex335	NC_000002.12:g.178552812del	NC_000002.12(NM_001267550.2):c.90088del	NP_001254479.2:p.(Val30030TyrfsTer10)	PATHOGENIC	PVS1,PM2_supporting,PS4_supporting
2	178528959	G	A	2-178528959-G-A	TTN	NM_001267550.2	c.106792C>T_p.Gln35598Ter	1	SG	stop_gained	Ex360	NC_000002.12:g.178528959G>A	NC_000002.12(NM_001267550.2):c.106792C>T	NP_001254479.2:p.(Gln35598Ter)	PATHOGENIC	PVS1,PM2_supporting,PS4_supporting
2	178636764	C	A	2-178636764-C-A	TTN	NM_001267550.2	c.40963G>T_p.Glu13655Ter	1	SG	stop_gained	Ex225	NC_000002.12:g.178636764C>A	NC_000002.12(NM_001267550.2):c.40963G>T	NP_001254479.2:p.(Glu13655Ter)	PATHOGENIC	PVS1,PM2_supporting,PS4_supporting
2	178595585	G	A	2-178595585-G-A	TTN	NM_001267550.2	c.57769C>T_p.Arg19257Ter	1	SG	stop_gained	Ex295	NC_000002.12:g.178595585G>A	NC_000002.12(NM_001267550.2):c.57769C>T	NP_001254479.2:p.(Arg19257Ter)	PATHOGENIC	PVS1,PM2_supporting,PS4_supporting
2	178640540	C	A	2-178640540-C-A	TTN	NM_001267550.2	c.40723+1G>T_p.?	1	ESS	splice_donor_variant	In221/222	NC_000002.12:g.178640540C>A	NC_000002.12(NM_001267550.2):c.40723+1G>T	NP_001254479.2:p.(?)	PATHOGENIC	PVS1,PM2_supporting,PS4_supporting
2	178739537	G	A	2-178739537-G-A	TTN	NM_001267550.2	c.13696C>T_p.Gln4566Ter	1	SG	stop_gained	Ex48	NC_000002.12:g.178739537G>A	NC_000002.12(NM_001267550.2):c.13696C>T	NP_001254479.2:p.(Gln4566Ter)	PATHOGENIC	PVS1,PM2_supporting,PS4_supporting
2	178532523	G	A	2-178532523-G-A	TTN	NM_001267550.2	c.104092C>T_p.Arg34698Ter	1	SG	stop_gained	Ex358	NC_000002.12:g.178532523G>A	NC_000002.12(NM_001267550.2):c.104092C>T	NP_001254479.2:p.(Arg34698Ter)	PATHOGENIC	PVS1,PM2_supporting,PS4_supporting
2	178552813	TTC	T	2-178552813-TTC-T	TTN	NM_001267550.2	c.90085_90086del_p.Glu30029SerfsTer7	1	FS	frameshift_variant	Ex335	NC_000002.12:g.178552814_178552815del	NC_000002.12(NM_001267550.2):c.90085_90086del	NP_001254479.2:p.(Glu30029SerfsTer7)	PATHOGENIC	PVS1,PM2_supporting,PS4_supporting
2	178582294	A	G	2-178582294-A-G	TTN	NM_001267550.2	c.66160+2T>C_p.?	1	ESS	splice_donor_variant	In314/315	NC_000002.12:g.178582294A>G	NC_000002.12(NM_001267550.2):c.66160+2T>C	NP_001254479.2:p.(?)	PATHOGENIC	PVS1,PM2_supporting,PS4_supporting
2	178552900	CT	C	2-178552900-CT-C	TTN	NM_001267550.2	c.89999del_p.Lys30000ArgfsTer26	1	FS	frameshift_variant	Ex335	NC_000002.12:g.178552901del	NC_000002.12(NM_001267550.2):c.89999del	NP_001254479.2:p.(Lys30000ArgfsTer26)	LIKELY_PATHOGENIC	PVS1,PM2_supporting
2	178554217	CTATT	C	2-178554217-CTATT-C	TTN	NM_001267550.2	c.88895-5_88895-2del_p.?	1	ESS	splice_acceptor_variant	In332/333	NC_000002.12:g.178554218_178554221del	NC_000002.12(NM_001267550.2):c.88895-5_88895-2del	NP_001254479.2:p.(?)	PATHOGENIC	PVS1,PM2_supporting,PS4_supporting
2	178766474	G	A	2-178766474-G-A	TTN	NM_001267550.2	c.9610C>T_p.Arg3204Ter	1	SG	stop_gained	Ex41	NC_000002.12:g.178766474G>A	NC_000002.12(NM_001267550.2):c.9610C>T	NP_001254479.2:p.(Arg3204Ter)	PATHOGENIC	PVS1,PM2_supporting,PS4_supporting
2	178768157	T	A	2-178768157-T-A	TTN	NM_001267550.2	c.9164-2A>T_p.?	1	ESS	splice_acceptor_variant	In38/39	NC_000002.12:g.178768157T>A	NC_000002.12(NM_001267550.2):c.9164-2A>T	NP_001254479.2:p.(?)	PATHOGENIC	PVS1,PM2_supporting,PS4_supporting
2	178530239	AC	A	2-178530239-AC-A	TTN	NM_001267550.2	c.106374+1del_p.?	1	ESS	splice_donor_variant	In358/359	NC_000002.12:g.178530240del	NC_000002.12(NM_001267550.2):c.106374+1del	NP_001254479.2:p.(?)	PATHOGENIC	PVS1,PM2_supporting,PS4_supporting
2	178552941	AT	A	2-178552941-AT-A	TTN	NM_001267550.2	c.89958del_p.Lys29986AsnfsTer9	1	FS	frameshift_variant	Ex335	NC_000002.12:g.178552942del	NC_000002.12(NM_001267550.2):c.89958del	NP_001254479.2:p.(Lys29986AsnfsTer9)	LIKELY_PATHOGENIC	PVS1,PM2_supporting
2	178589219	G	A	2-178589219-G-A	TTN	NM_001267550.2	c.62506C>T_p.Arg20836Ter	1	SG	stop_gained	Ex304	NC_000002.12:g.178589219G>A	NC_000002.12(NM_001267550.2):c.62506C>T	NP_001254479.2:p.(Arg20836Ter)	PATHOGENIC	PVS1,PM2_supporting,PS4_supporting
2	178589849	G	A	2-178589849-G-A	TTN	NM_001267550.2	c.61876C>T_p.Arg20626Ter	1	SG	stop_gained	Ex304	NC_000002.12:g.178589849G>A	NC_000002.12(NM_001267550.2):c.61876C>T	NP_001254479.2:p.(Arg20626Ter)	PATHOGENIC	PVS1,PP5,PS4
2	178537173	C	T	2-178537173-C-T	TTN	NM_001267550.2	c.99936G>A_p.Trp33312Ter	1	SG	stop_gained	Ex356	NC_000002.12:g.178537173C>T	NC_000002.12(NM_001267550.2):c.99936G>A	NP_001254479.2:p.(Trp33312Ter)	LIKELY_PATHOGENIC	PVS1,PP5,PS4_supporting
2	178553740	C	T	2-178553740-C-T	TTN	NM_001267550.2	c.89265G>A_p.Trp29755Ter	1	SG	stop_gained	Ex334	NC_000002.12:g.178553740C>T	NC_000002.12(NM_001267550.2):c.89265G>A	NP_001254479.2:p.(Trp29755Ter)	LIKELY_PATHOGENIC	PVS1,PS4_supporting
2	178552996	ATAAT	A	2-178552996-ATAAT-A	TTN	NM_001267550.2	c.89900_89903del_p.Asn29967MetfsTer27	1	FS	frameshift_variant	Ex335	NC_000002.12:g.178552997_178553000del	NC_000002.12(NM_001267550.2):c.89900_89903del	NP_001254479.2:p.(Asn29967MetfsTer27)	PATHOGENIC	PVS1,PM2_supporting,PP5,PS4
2	178553579	CG	C	2-178553579-CG-C	TTN	NM_001267550.2	c.89425del_p.Arg29809GlyfsTer5	1	FS	frameshift_variant	Ex334	NC_000002.12:g.178553580del	NC_000002.12(NM_001267550.2):c.89425del	NP_001254479.2:p.(Arg29809GlyfsTer5)	PATHOGENIC	PVS1,PM2_supporting,PP5,PS4_supporting
2	178580026	C	A	2-178580026-C-A	TTN	NM_001267550.2	c.67261G>T_p.Gly22421Ter	1	SG	stop_gained	Ex318	NC_000002.12:g.178580026C>A	NC_000002.12(NM_001267550.2):c.67261G>T	NP_001254479.2:p.(Gly22421Ter)	LIKELY_PATHOGENIC	PVS1,PM2_supporting
2	178554881	GA	G	2-178554881-GA-G	TTN	NM_001267550.2	c.88577del_p.Ile29526ThrfsTer21	1	FS	frameshift_variant	Ex331	NC_000002.12:g.178554882del	NC_000002.12(NM_001267550.2):c.88577del	NP_001254479.2:p.(Ile29526ThrfsTer21)	LIKELY_PATHOGENIC	PVS1,PM2_supporting
2	178615486	T	C	2-178615486-T-C	TTN	NM_001267550.2	c.48461-2A>G_p.?	1	ESS	splice_acceptor_variant	In258/259	NC_000002.12:g.178615486T>C	NC_000002.12(NM_001267550.2):c.48461-2A>G	NP_001254479.2:p.(?)	LIKELY_PATHOGENIC	PVS1,PM2_supporting
2	178741442	T	A	2-178741442-T-A	TTN	NM_001267550.2	c.11791A>T_p.Lys3931Ter	1	SG	stop_gained	Ex48	NC_000002.12:g.178741442T>A	NC_000002.12(NM_001267550.2):c.11791A>T	NP_001254479.2:p.(Lys3931Ter)	LIKELY_PATHOGENIC	PVS1,PM2_supporting
2	178556866	T	TAATG	2-178556866-T-TAATG	TTN	NM_001267550.2	c.88284_88287dup_p.Thr29430HisfsTer13	1	FS	frameshift_variant	Ex330	NC_000002.12:g.178556866_178556867insAATG	NC_000002.12(NM_001267550.2):c.88284_88287dup	NP_001254479.2:p.(Thr29430HisfsTer13)	LIKELY_PATHOGENIC	PVS1,PM2_supporting
2	178608256	TGA	T	2-178608256-TGA-T	TTN	NM_001267550.2	c.52625_52626del_p.Phe17542Ter	1	SG	frameshift_variant|stop_gained	Ex275	NC_000002.12:g.178608257_178608258del	NC_000002.12(NM_001267550.2):c.52625_52626del	NP_001254479.2:p.(Phe17542Ter)	LIKELY_PATHOGENIC	PVS1,PM2_supporting
2	178562650	C	A	2-178562650-C-A	TTN	NM_001267550.2	c.83482G>T_p.Glu27828Ter	1	SG	stop_gained	Ex326	NC_000002.12:g.178562650C>A	NC_000002.12(NM_001267550.2):c.83482G>T	NP_001254479.2:p.(Glu27828Ter)	LIKELY_PATHOGENIC	PVS1,PM2_supporting
2	178633327	C	G	2-178633327-C-G	TTN	NM_001267550.2	c.42947-1G>C_p.?	1	ESS	splice_acceptor_variant	In232/233	NC_000002.12:g.178633327C>G	NC_000002.12(NM_001267550.2):c.42947-1G>C	NP_001254479.2:p.(?)	LIKELY_PATHOGENIC	PVS1,PM2_supporting
2	178619747	T	TATCA	2-178619747-T-TATCA	TTN	NM_001267550.2	c.46566_46569dup_p.Lys15524Ter	1	SG	frameshift_variant|stop_gained	Ex250	NC_000002.12:g.178619747_178619748insATCA	NC_000002.12(NM_001267550.2):c.46566_46569dup	NP_001254479.2:p.(Lys15524Ter)	LIKELY_PATHOGENIC	PVS1,PM2_supporting
2	178557545	TC	T	2-178557545-TC-T	TTN	NM_001267550.2	c.87716del_p.Gly29239AspfsTer32	1	FS	frameshift_variant	Ex329	NC_000002.12:g.178557546del	NC_000002.12(NM_001267550.2):c.87716del	NP_001254479.2:p.(Gly29239AspfsTer32)	LIKELY_PATHOGENIC	PVS1,PM2_supporting,PS4_NA(BP->PP)
2	178768934	C	T	2-178768934-C-T	TTN	NM_001267550.2	c.8903-1G>A_p.?	1	ESS	splice_acceptor_variant	In37/38	NC_000002.12:g.178768934C>T	NC_000002.12(NM_001267550.2):c.8903-1G>A	NP_001254479.2:p.(?)	LIKELY_PATHOGENIC	PVS1,PM2_supporting
2	178753123	C	G	2-178753123-C-G	TTN	NM_001267550.2	c.11311+1G>C_p.?	1	ESS	splice_donor_variant	In47/48	NC_000002.12:g.178753123C>G	NC_000002.12(NM_001267550.2):c.11311+1G>C	NP_001254479.2:p.(?)	LIKELY_PATHOGENIC	PVS1,PM2_supporting
2	178557998	GC	G	2-178557998-GC-G	TTN	NM_001267550.2	c.87355del_p.Ala29119LeufsTer17	1	FS	frameshift_variant	Ex328	NC_000002.12:g.178557999del	NC_000002.12(NM_001267550.2):c.87355del	NP_001254479.2:p.(Ala29119LeufsTer17)	PATHOGENIC	PVS1,PM2_supporting,PP5,PS4_supporting
2	178558475	GC	G	2-178558475-GC-G	TTN	NM_001267550.2	c.86983del_p.Ala28995GlnfsTer11	1	FS	frameshift_variant	Ex327	NC_000002.12:g.178558476del	NC_000002.12(NM_001267550.2):c.86983del	NP_001254479.2:p.(Ala28995GlnfsTer11)	LIKELY_PATHOGENIC	PVS1,PM2_supporting
2	178602281	C	T	2-178602281-C-T	TTN	NM_001267550.2	c.55120+1G>A_p.?	1	ESS	splice_donor_variant	In283/284	NC_000002.12:g.178602281C>T	NC_000002.12(NM_001267550.2):c.55120+1G>A	NP_001254479.2:p.(?)	LIKELY_PATHOGENIC	PVS1,PM2_supporting
2	178559479	GT	G	2-178559479-GT-G	TTN	NM_001267550.2	c.86652del_p.Lys28884AsnfsTer12	1	FS	frameshift_variant	Ex326	NC_000002.12:g.178559480del	NC_000002.12(NM_001267550.2):c.86652del	NP_001254479.2:p.(Lys28884AsnfsTer12)	LIKELY_PATHOGENIC	PVS1,PM2_supporting
2	178770321	C	G	2-178770321-C-G	TTN	NM_001267550.2	c.8381-1G>C_p.?	1	ESS	splice_acceptor_variant	In35/36	NC_000002.12:g.178770321C>G	NC_000002.12(NM_001267550.2):c.8381-1G>C	NP_001254479.2:p.(?)	LIKELY_PATHOGENIC	PVS1,PM2_supporting
2	178769921	G	GT	2-178769921-G-GT	TTN	NM_001267550.2	c.8659dup_p.Thr2887AsnfsTer9	1	FS	frameshift_variant	Ex37	NC_000002.12:g.178769921_178769922insT	NC_000002.12(NM_001267550.2):c.8659dup	NP_001254479.2:p.(Thr2887AsnfsTer9)	LIKELY_PATHOGENIC	PVS1,PM2_supporting
2	178620519	C	T	2-178620519-C-T	TTN	NM_001267550.2	c.46002G>A_p.Trp15334Ter	1	SG	stop_gained	Ex248	NC_000002.12:g.178620519C>T	NC_000002.12(NM_001267550.2):c.46002G>A	NP_001254479.2:p.(Trp15334Ter)	LIKELY_PATHOGENIC	PVS1,PM2_supporting
2	178776263	G	C	2-178776263-G-C	TTN	NM_001267550.2	c.5601C>G_p.Tyr1867Ter	1	SG	stop_gained	Ex28	NC_000002.12:g.178776263G>C	NC_000002.12(NM_001267550.2):c.5601C>G	NP_001254479.2:p.(Tyr1867Ter)	LIKELY_PATHOGENIC	PVS1,PM2_supporting
2	178546688	A	T	2-178546688-A-T	TTN	NM_001267550.2	c.94740T>A_p.Tyr31580Ter	1	SG	stop_gained	Ex341	NC_000002.12:g.178546688A>T	NC_000002.12(NM_001267550.2):c.94740T>A	NP_001254479.2:p.(Tyr31580Ter)	LIKELY_PATHOGENIC	PVS1,PM2_supporting
2	178769921	GT	G	2-178769921-GT-G	TTN	NM_001267550.2	c.8659del_p.Thr2887ProfsTer2	1	FS	frameshift_variant	Ex37	NC_000002.12:g.178769922del	NC_000002.12(NM_001267550.2):c.8659del	NP_001254479.2:p.(Thr2887ProfsTer2)	LIKELY_PATHOGENIC	PVS1,PM2_supporting
2	178549285	T	A	2-178549285-T-A	TTN	NM_001267550.2	c.92341A>T_p.Lys30781Ter	1	SG	stop_gained	Ex339	NC_000002.12:g.178549285T>A	NC_000002.12(NM_001267550.2):c.92341A>T	NP_001254479.2:p.(Lys30781Ter)	LIKELY_PATHOGENIC	PVS1,PM2_supporting
2	178559554	CTT	C	2-178559554-CTT-C	TTN	NM_001267550.2	c.86576_86577del_p.Lys28859ArgfsTer11	1	FS	frameshift_variant	Ex326	NC_000002.12:g.178559555_178559556del	NC_000002.12(NM_001267550.2):c.86576_86577del	NP_001254479.2:p.(Lys28859ArgfsTer11)	LIKELY_PATHOGENIC	PVS1,PM2_supporting
2	178559740	TAGTAC	T	2-178559740-TAGTAC-T	TTN	NM_001267550.2	c.86387_86391del_p.Arg28796GlnfsTer5	1	FS	frameshift_variant	Ex326	NC_000002.12:g.178559741_178559745del	NC_000002.12(NM_001267550.2):c.86387_86391del	NP_001254479.2:p.(Arg28796GlnfsTer5)	LIKELY_PATHOGENIC	PVS1,PM2_supporting,PP5
2	178590452	C	A	2-178590452-C-A	TTN	NM_001267550.2	c.61273G>T_p.Glu20425Ter	1	SG	stop_gained	Ex304	NC_000002.12:g.178590452C>A	NC_000002.12(NM_001267550.2):c.61273G>T	NP_001254479.2:p.(Glu20425Ter)	LIKELY_PATHOGENIC	PVS1,PM2_supporting
2	178560231	CTT	C	2-178560231-CTT-C	TTN	NM_001267550.2	c.85899_85900del_p.Leu28635SerfsTer3	1	FS	frameshift_variant	Ex326	NC_000002.12:g.178560232_178560233del	NC_000002.12(NM_001267550.2):c.85899_85900del	NP_001254479.2:p.(Leu28635SerfsTer3)	PATHOGENIC	PVS1,PM2_supporting,PP5,PS4_supporting
2	178795040	C	T	2-178795040-C-T	TTN	NM_001267550.2	c.1127G>A_p.Trp376Ter	1	SG	stop_gained	Ex7	NC_000002.12:g.178795040C>T	NC_000002.12(NM_001267550.2):c.1127G>A	NP_001254479.2:p.(Trp376Ter)	LIKELY_PATHOGENIC	PVS1,PM2_supporting
2	178551700	A	T	2-178551700-A-T	TTN	NM_001267550.2	c.91200T>A_p.Tyr30400Ter	1	SG	stop_gained	Ex335	NC_000002.12:g.178551700A>T	NC_000002.12(NM_001267550.2):c.91200T>A	NP_001254479.2:p.(Tyr30400Ter)	LIKELY_PATHOGENIC	PVS1,PM2_supporting
2	178560676	AAT	A	2-178560676-AAT-A	TTN	NM_001267550.2	c.85454_85455del_p.Tyr28485LeufsTer7	1	FS	frameshift_variant	Ex326	NC_000002.12:g.178560677_178560678del	NC_000002.12(NM_001267550.2):c.85454_85455del	NP_001254479.2:p.(Tyr28485LeufsTer7)	LIKELY_PATHOGENIC	PVS1,PM2_supporting
2	178560796	T	TG	2-178560796-T-TG	TTN	NM_001267550.2	c.85335dup_p.Lys28446GlnfsTer4	1	FS	frameshift_variant	Ex326	NC_000002.12:g.178560796_178560797insG	NC_000002.12(NM_001267550.2):c.85335dup	NP_001254479.2:p.(Lys28446GlnfsTer4)	LIKELY_PATHOGENIC	PVS1,PM2_supporting
2	178561120	CACTA	C	2-178561120-CACTA-C	TTN	NM_001267550.2	c.85008_85011del_p.Glu28338HisfsTer9	1	FS	frameshift_variant	Ex326	NC_000002.12:g.178561121_178561124del	NC_000002.12(NM_001267550.2):c.85008_85011del	NP_001254479.2:p.(Glu28338HisfsTer9)	PATHOGENIC	PVS1,PM2_supporting,PS4_supporting
2	178741812	G	C	2-178741812-G-C	TTN	NM_001267550.2	c.11421C>G_p.Tyr3807Ter	1	SG	stop_gained	Ex48	NC_000002.12:g.178741812G>C	NC_000002.12(NM_001267550.2):c.11421C>G	NP_001254479.2:p.(Tyr3807Ter)	LIKELY_PATHOGENIC	PVS1,PM2_supporting
2	178561301	AT	A	2-178561301-AT-A	TTN	NM_001267550.2	c.84830del_p.His28277LeufsTer24	1	FS	frameshift_variant	Ex326	NC_000002.12:g.178561302del	NC_000002.12(NM_001267550.2):c.84830del	NP_001254479.2:p.(His28277LeufsTer24)	LIKELY_PATHOGENIC	PVS1,PM2_supporting
2	178775741	C	T	2-178775741-C-T	TTN	NM_001267550.2	c.6123G>A_p.Trp2041Ter	1	SG	stop_gained	Ex28	NC_000002.12:g.178775741C>T	NC_000002.12(NM_001267550.2):c.6123G>A	NP_001254479.2:p.(Trp2041Ter)	LIKELY_PATHOGENIC	PVS1,PM2_supporting
2	178561542	CTTCT	C	2-178561542-CTTCT-C	TTN	NM_001267550.2	c.84586_84589del_p.Arg28196AlafsTer18	1	FS	frameshift_variant	Ex326	NC_000002.12:g.178561543_178561546del	NC_000002.12(NM_001267550.2):c.84586_84589del	NP_001254479.2:p.(Arg28196AlafsTer18)	PATHOGENIC	PVS1,PM2_supporting,PP5,PS4_supporting
2	178566343	C	A	2-178566343-C-A	TTN	NM_001267550.2	c.79789G>T_p.Glu26597Ter	1	SG	stop_gained	Ex326	NC_000002.12:g.178566343C>A	NC_000002.12(NM_001267550.2):c.79789G>T	NP_001254479.2:p.(Glu26597Ter)	LIKELY_PATHOGENIC	PVS1,PM2_supporting
2	178561589	AT	A	2-178561589-AT-A	TTN	NM_001267550.2	c.84542del_p.Asp28181ValfsTer6	1	FS	frameshift_variant	Ex326	NC_000002.12:g.178561590del	NC_000002.12(NM_001267550.2):c.84542del	NP_001254479.2:p.(Asp28181ValfsTer6)	LIKELY_PATHOGENIC	PVS1,PM2_supporting
2	178759173	C	A	2-178759173-C-A	TTN	NM_001267550.2	c.10115-1G>T_p.?	1	ESS	splice_acceptor_variant	In43/44	NC_000002.12:g.178759173C>A	NC_000002.12(NM_001267550.2):c.10115-1G>T	NP_001254479.2:p.(?)	LIKELY_PATHOGENIC	PVS1,PM2_supporting
2	178562332	AG	A	2-178562332-AG-A	TTN	NM_001267550.2	c.83799del_p.Phe27934SerfsTer3	1	FS	frameshift_variant	Ex326	NC_000002.12:g.178562333del	NC_000002.12(NM_001267550.2):c.83799del	NP_001254479.2:p.(Phe27934SerfsTer3)	LIKELY_PATHOGENIC	PVS1,PM2_supporting
2	178549253	A	T	2-178549253-A-T	TTN	NM_001267550.2	c.92373T>A_p.Tyr30791Ter	1	SG	stop_gained	Ex339	NC_000002.12:g.178549253A>T	NC_000002.12(NM_001267550.2):c.92373T>A	NP_001254479.2:p.(Tyr30791Ter)	LIKELY_PATHOGENIC	PVS1,PM2_supporting
2	178562463	TC	T	2-178562463-TC-T	TTN	NM_001267550.2	c.83668del_p.Asp27890MetfsTer30	1	FS	frameshift_variant	Ex326	NC_000002.12:g.178562464del	NC_000002.12(NM_001267550.2):c.83668del	NP_001254479.2:p.(Asp27890MetfsTer30)	LIKELY_PATHOGENIC	PVS1,PM2_supporting
2	178779227	A	G	2-178779227-A-G	TTN	NM_001267550.2	c.3963+2T>C_p.?	1	ESS	splice_donor_variant	In23/24	NC_000002.12:g.178779227A>G	NC_000002.12(NM_001267550.2):c.3963+2T>C	NP_001254479.2:p.(?)	LIKELY_PATHOGENIC	PVS1,PM2_supporting
2	178740952	TAA	T	2-178740952-TAA-T	TTN	NM_001267550.2	c.12279_12280del_p.Tyr4094Ter	1	SG	frameshift_variant|stop_gained	Ex48	NC_000002.12:g.178740953_178740954del	NC_000002.12(NM_001267550.2):c.12279_12280del	NP_001254479.2:p.(Tyr4094Ter)	LIKELY_PATHOGENIC	PVS1,PM2_supporting
2	178565465	A	C	2-178565465-A-C	TTN	NM_001267550.2	c.80667T>G_p.Tyr26889Ter	1	SG	stop_gained	Ex326	NC_000002.12:g.178565465A>C	NC_000002.12(NM_001267550.2):c.80667T>G	NP_001254479.2:p.(Tyr26889Ter)	LIKELY_PATHOGENIC	PVS1,PM2_supporting
2	178562724	AC	A	2-178562724-AC-A	TTN	NM_001267550.2	c.83407del_p.Val27803SerfsTer68	1	FS	frameshift_variant	Ex326	NC_000002.12:g.178562725del	NC_000002.12(NM_001267550.2):c.83407del	NP_001254479.2:p.(Val27803SerfsTer68)	PATHOGENIC	PVS1,PM2_supporting,PP5,PS4_supporting
2	178799567	AG	A	2-178799567-AG-A	TTN	NM_001267550.2	c.833del_p.Ala278ValfsTer9	1	FS	frameshift_variant	Ex6	NC_000002.12:g.178799568del	NC_000002.12(NM_001267550.2):c.833del	NP_001254479.2:p.(Ala278ValfsTer9)	LIKELY_PATHOGENIC	PVS1,PM2_supporting,PP5
2	178562747	TC	T	2-178562747-TC-T	TTN	NM_001267550.2	c.83384del_p.Gly27795GlufsTer76	1	FS	frameshift_variant	Ex326	NC_000002.12:g.178562748del	NC_000002.12(NM_001267550.2):c.83384del	NP_001254479.2:p.(Gly27795GlufsTer76)	LIKELY_PATHOGENIC	PVS1,PM2_supporting,PP5
2	178777524	G	T	2-178777524-G-T	TTN	NM_001267550.2	c.4541C>A_p.Ser1514Ter	1	SG	stop_gained	Ex26	NC_000002.12:g.178777524G>T	NC_000002.12(NM_001267550.2):c.4541C>A	NP_001254479.2:p.(Ser1514Ter)	LIKELY_PATHOGENIC	PVS1,PM2_supporting
2	178599827	C	A	2-178599827-C-A	TTN	NM_001267550.2	c.56074G>T_p.Glu18692Ter	1	SG	stop_gained	Ex289	NC_000002.12:g.178599827C>A	NC_000002.12(NM_001267550.2):c.56074G>T	NP_001254479.2:p.(Glu18692Ter)	LIKELY_PATHOGENIC	PVS1,PM2_supporting
2	178587801	CTGCAAA	C	2-178587801-CTGCAAA-C	TTN	NM_001267550.2	c.63509-7_63509-2del_p.?	1	ESS	splice_acceptor_variant	In305/306	NC_000002.12:g.178587802_178587807del	NC_000002.12(NM_001267550.2):c.63509-7_63509-2del	NP_001254479.2:p.(?)	LIKELY_PATHOGENIC	PVS1,PM2_supporting
2	178641316	C	G	2-178641316-C-G	TTN	NM_001267550.2	c.40559-1G>C_p.?	1	ESS	splice_acceptor_variant	In219/220	NC_000002.12:g.178641316C>G	NC_000002.12(NM_001267550.2):c.40559-1G>C	NP_001254479.2:p.(?)	LIKELY_PATHOGENIC	PVS1,PM2_supporting
2	178770676	C	G	2-178770676-C-G	TTN	NM_001267550.2	c.8117-1G>C_p.?	1	ESS	splice_acceptor_variant	In34/35	NC_000002.12:g.178770676C>G	NC_000002.12(NM_001267550.2):c.8117-1G>C	NP_001254479.2:p.(?)	LIKELY_PATHOGENIC	PVS1,PM2_supporting
2	178610329	A	AACTT	2-178610329-A-AACTT	TTN	NM_001267550.2	c.51193_51196dup_p.Leu17066Ter	1	SG	frameshift_variant|stop_gained	Ex271	NC_000002.12:g.178610329_178610330insACTT	NC_000002.12(NM_001267550.2):c.51193_51196dup	NP_001254479.2:p.(Leu17066Ter)	LIKELY_PATHOGENIC	PVS1,PM2_supporting
2	178770483	GCA	G	2-178770483-GCA-G	TTN	NM_001267550.2	c.8307_8308del_p.Ala2770HisfsTer4	1	FS	frameshift_variant	Ex35	NC_000002.12:g.178770484_178770485del	NC_000002.12(NM_001267550.2):c.8307_8308del	NP_001254479.2:p.(Ala2770HisfsTer4)	PATHOGENIC	PVS1,PM2_supporting,PP5,PS4_moderate
2	178546503	C	T	2-178546503-C-T	TTN	NM_001267550.2	c.94829-1G>A_p.?	1	ESS	splice_acceptor_variant	In341/342	NC_000002.12:g.178546503C>T	NC_000002.12(NM_001267550.2):c.94829-1G>A	NP_001254479.2:p.(?)	LIKELY_PATHOGENIC	PVS1,PM2_supporting
2	178563058	TAGCACTTGCA	T	2-178563058-TAGCACTTGCA-T	TTN	NM_001267550.2	c.83064_83073del_p.Ala27689LeufsTer31	1	FS	frameshift_variant	Ex326	NC_000002.12:g.178563059_178563068del	NC_000002.12(NM_001267550.2):c.83064_83073del	NP_001254479.2:p.(Ala27689LeufsTer31)	LIKELY_PATHOGENIC	PVS1,PM2_supporting,PP5
2	178563555	TC	T	2-178563555-TC-T	TTN	NM_001267550.2	c.82576del_p.Asp27526IlefsTer6	1	FS	frameshift_variant	Ex326	NC_000002.12:g.178563556del	NC_000002.12(NM_001267550.2):c.82576del	NP_001254479.2:p.(Asp27526IlefsTer6)	LIKELY_PATHOGENIC	PVS1,PM2_supporting,PP5
2	178563806	G	GA	2-178563806-G-GA	TTN	NM_001267550.2	c.82325dup_p.Arg27443ProfsTer7	1	FS	frameshift_variant	Ex326	NC_000002.12:g.178563806_178563807insA	NC_000002.12(NM_001267550.2):c.82325dup	NP_001254479.2:p.(Arg27443ProfsTer7)	LIKELY_PATHOGENIC	PVS1,PM2_supporting
2	178799590	TA	T	2-178799590-TA-T	TTN	NM_001267550.2	c.810del_p.Ile271LeufsTer16	1	FS	frameshift_variant	Ex6	NC_000002.12:g.178799591del	NC_000002.12(NM_001267550.2):c.810del	NP_001254479.2:p.(Ile271LeufsTer16)	LIKELY_PATHOGENIC	PVS1,PM2_supporting
2	178565391	A	AC	2-178565391-A-AC	TTN	NM_001267550.2	c.80740dup_p.Val26914GlyfsTer5	1	FS	frameshift_variant	Ex326	NC_000002.12:g.178565391_178565392insC	NC_000002.12(NM_001267550.2):c.80740dup	NP_001254479.2:p.(Val26914GlyfsTer5)	LIKELY_PATHOGENIC	PVS1,PM2_supporting,PP5
2	178565733	ATAAGTGATGCACTGGTCTGGGACACATCAGTGAG	A	2-178565733-ATAAGTGATGCACTGGTCTGGGACACATCAGTGAG-A	TTN	NM_001267550.2	c.80365_80398del_p.Leu26789CysfsTer44	1	FS	frameshift_variant	Ex326	NC_000002.12:g.178565734_178565767del	NC_000002.12(NM_001267550.2):c.80365_80398del	NP_001254479.2:p.(Leu26789CysfsTer44)	LIKELY_PATHOGENIC	PVS1,PM2_supporting
2	178565894	G	GT	2-178565894-G-GT	TTN	NM_001267550.2	c.80237dup_p.Asn26746LysfsTer15	1	FS	frameshift_variant	Ex326	NC_000002.12:g.178565894_178565895insT	NC_000002.12(NM_001267550.2):c.80237dup	NP_001254479.2:p.(Asn26746LysfsTer15)	LIKELY_PATHOGENIC	PVS1,PM2_supporting
2	178589461	AC	A	2-178589461-AC-A	TTN	NM_001267550.2	c.62263del_p.Val20755Ter	1	SG	frameshift_variant|stop_gained	Ex304	NC_000002.12:g.178589462del	NC_000002.12(NM_001267550.2):c.62263del	NP_001254479.2:p.(Val20755Ter)	LIKELY_PATHOGENIC	PVS1,PM2_supporting
2	178784308	A	T	2-178784308-A-T	TTN	NM_001267550.2	c.2537T>A_p.Leu846Ter	1	SG	stop_gained	Ex16	NC_000002.12:g.178784308A>T	NC_000002.12(NM_001267550.2):c.2537T>A	NP_001254479.2:p.(Leu846Ter)	LIKELY_PATHOGENIC	PVS1,PM2_supporting
2	178591505	C	CTGAAA	2-178591505-C-CTGAAA	TTN	NM_001267550.2	c.60221-6_60221-2dup_p.?	1	ESS	splice_acceptor_variant	In303/304	NC_000002.12:g.178591505_178591506insTGAAA	NC_000002.12(NM_001267550.2):c.60221-6_60221-2dup	NP_001254479.2:p.(?)	LIKELY_PATHOGENIC	PVS1,PM2_supporting
2	178566468	TCA	T	2-178566468-TCA-T	TTN	NM_001267550.2	c.79662_79663del_p.Glu26555ThrfsTer5	1	FS	frameshift_variant	Ex326	NC_000002.12:g.178566469_178566470del	NC_000002.12(NM_001267550.2):c.79662_79663del	NP_001254479.2:p.(Glu26555ThrfsTer5)	LIKELY_PATHOGENIC	PVS1,PM2_supporting
2	178773837	C	G	2-178773837-C-G	TTN	NM_001267550.2	c.7330+1G>C_p.?	1	ESS	splice_donor_variant	In31/32	NC_000002.12:g.178773837C>G	NC_000002.12(NM_001267550.2):c.7330+1G>C	NP_001254479.2:p.(?)	LIKELY_PATHOGENIC	PVS1,PM2_supporting
2	178566527	T	TTC	2-178566527-T-TTC	TTN	NM_001267550.2	c.79604_79605insGA_p.Ile26536LysfsTer2	1	FS	frameshift_variant	Ex326	NC_000002.12:g.178566527_178566528insTC	NC_000002.12(NM_001267550.2):c.79604_79605insGA	NP_001254479.2:p.(Ile26536LysfsTer2)	LIKELY_PATHOGENIC	PVS1,PM2_supporting
2	178566787	TC	T	2-178566787-TC-T	TTN	NM_001267550.2	c.79344del_p.Thr26449GlnfsTer3	1	FS	frameshift_variant	Ex326	NC_000002.12:g.178566788del	NC_000002.12(NM_001267550.2):c.79344del	NP_001254479.2:p.(Thr26449GlnfsTer3)	LIKELY_PATHOGENIC	PVS1,PM2_supporting
2	178567273	GTCTA	G	2-178567273-GTCTA-G	TTN	NM_001267550.2	c.78855_78858del_p.Arg26286GlnfsTer20	1	FS	frameshift_variant	Ex326	NC_000002.12:g.178567274_178567277del	NC_000002.12(NM_001267550.2):c.78855_78858del	NP_001254479.2:p.(Arg26286GlnfsTer20)	LIKELY_PATHOGENIC	PVS1,PM2_supporting,PP5
2	178567681	A	AC	2-178567681-A-AC	TTN	NM_001267550.2	c.78450dup_p.Ser26151ValfsTer5	1	FS	frameshift_variant	Ex326	NC_000002.12:g.178567681_178567682insC	NC_000002.12(NM_001267550.2):c.78450dup	NP_001254479.2:p.(Ser26151ValfsTer5)	LIKELY_PATHOGENIC	PVS1,PM2_supporting
2	178592222	A	T	2-178592222-A-T	TTN	NM_001267550.2	c.59682T>A_p.Cys19894Ter	1	SG	stop_gained	Ex302	NC_000002.12:g.178592222A>T	NC_000002.12(NM_001267550.2):c.59682T>A	NP_001254479.2:p.(Cys19894Ter)	LIKELY_PATHOGENIC	PVS1,PM2_supporting
2	178567706	AT	A	2-178567706-AT-A	TTN	NM_001267550.2	c.78425del_p.Asn26142MetfsTer31	1	FS	frameshift_variant	Ex326	NC_000002.12:g.178567707del	NC_000002.12(NM_001267550.2):c.78425del	NP_001254479.2:p.(Asn26142MetfsTer31)	LIKELY_PATHOGENIC	PVS1,PM2_supporting,PP5
2	178634714	GCCCCATA	G	2-178634714-GCCCCATA-G	TTN	NM_001267550.2	c.42151+2_42151+8del_p.?	1	ESS	splice_donor_variant	In229/230	NC_000002.12:g.178634715_178634721del	NC_000002.12(NM_001267550.2):c.42151+2_42151+8del	NP_001254479.2:p.(?)	LIKELY_PATHOGENIC	PVS1,PM2_supporting
2	178539030	G	A	2-178539030-G-A	TTN	NM_001267550.2	c.98905C>T_p.Gln32969Ter	1	SG	stop_gained	Ex353	NC_000002.12:g.178539030G>A	NC_000002.12(NM_001267550.2):c.98905C>T	NP_001254479.2:p.(Gln32969Ter)	LIKELY_PATHOGENIC	PVS1,PM2_supporting
2	178567779	CT	C	2-178567779-CT-C	TTN	NM_001267550.2	c.78352del_p.Ser26118ValfsTer2	1	FS	frameshift_variant	Ex326	NC_000002.12:g.178567780del	NC_000002.12(NM_001267550.2):c.78352del	NP_001254479.2:p.(Ser26118ValfsTer2)	PATHOGENIC	PVS1,PM2_supporting,PS4_supporting
2	178567783	C	CA	2-178567783-C-CA	TTN	NM_001267550.2	c.78348dup_p.Gly26117TrpfsTer13	1	FS	frameshift_variant	Ex326	NC_000002.12:g.178567783_178567784insA	NC_000002.12(NM_001267550.2):c.78348dup	NP_001254479.2:p.(Gly26117TrpfsTer13)	LIKELY_PATHOGENIC	PVS1,PM2_supporting,PP5
2	178549197	G	C	2-178549197-G-C	TTN	NM_001267550.2	c.92429C>G_p.Ser30810Ter	1	SG	stop_gained	Ex339	NC_000002.12:g.178549197G>C	NC_000002.12(NM_001267550.2):c.92429C>G	NP_001254479.2:p.(Ser30810Ter)	LIKELY_PATHOGENIC	PVS1,PM2_supporting
2	178568536	C	A	2-178568536-C-A	TTN	NM_001267550.2	c.77596G>T_p.Gly25866Ter	1	SG	stop_gained	Ex326	NC_000002.12:g.178568536C>A	NC_000002.12(NM_001267550.2):c.77596G>T	NP_001254479.2:p.(Gly25866Ter)	LIKELY_PATHOGENIC	PVS1,PM2_supporting
2	178601915	C	G	2-178601915-C-G	TTN	NM_001267550.2	c.55270-1G>C_p.?	1	ESS	splice_acceptor_variant	In284/285	NC_000002.12:g.178601915C>G	NC_000002.12(NM_001267550.2):c.55270-1G>C	NP_001254479.2:p.(?)	LIKELY_PATHOGENIC	PVS1,PM2_supporting
2	178568180	AGCTACAATTGGATCAGACT	A	2-178568180-AGCTACAATTGGATCAGACT-A	TTN	NM_001267550.2	c.77933_77951del_p.Glu25978ValfsTer40	1	FS	frameshift_variant	Ex326	NC_000002.12:g.178568181_178568199del	NC_000002.12(NM_001267550.2):c.77933_77951del	NP_001254479.2:p.(Glu25978ValfsTer40)	LIKELY_PATHOGENIC	PVS1,PM2_supporting,PP5
2	178568252	TTC	T	2-178568252-TTC-T	TTN	NM_001267550.2	c.77878_77879del_p.Glu25960IlefsTer4	1	FS	frameshift_variant	Ex326	NC_000002.12:g.178568253_178568254del	NC_000002.12(NM_001267550.2):c.77878_77879del	NP_001254479.2:p.(Glu25960IlefsTer4)	LIKELY_PATHOGENIC	PVS1,PM2_supporting
2	178568306	A	AG	2-178568306-A-AG	TTN	NM_001267550.2	c.77825dup_p.Ala25943CysfsTer5	1	FS	frameshift_variant	Ex326	NC_000002.12:g.178568306_178568307insG	NC_000002.12(NM_001267550.2):c.77825dup	NP_001254479.2:p.(Ala25943CysfsTer5)	LIKELY_PATHOGENIC	PVS1,PM2_supporting
2	178568469	AGAGTTACAATT	A	2-178568469-AGAGTTACAATT-A	TTN	NM_001267550.2	c.77652_77662del_p.Glu25884AspfsTer3	1	FS	frameshift_variant	Ex326	NC_000002.12:g.178568470_178568480del	NC_000002.12(NM_001267550.2):c.77652_77662del	NP_001254479.2:p.(Glu25884AspfsTer3)	LIKELY_PATHOGENIC	PVS1,PM2_supporting
2	178571600	G	GTAAT	2-178571600-G-GTAAT	TTN	NM_001267550.2	c.74528_74531dup_p.Tyr24844Ter	1	SG	frameshift_variant|stop_gained	Ex326	NC_000002.12:g.178571600_178571601insTAAT	NC_000002.12(NM_001267550.2):c.74528_74531dup	NP_001254479.2:p.(Tyr24844Ter)	LIKELY_PATHOGENIC	PVS1,PM2_supporting
2	178568482	CGA	C	2-178568482-CGA-C	TTN	NM_001267550.2	c.77648_77649del_p.Ile25883ArgfsTer7	1	FS	frameshift_variant	Ex326	NC_000002.12:g.178568483_178568484del	NC_000002.12(NM_001267550.2):c.77648_77649del	NP_001254479.2:p.(Ile25883ArgfsTer7)	LIKELY_PATHOGENIC	PVS1,PM2_supporting
2	178530240	C	T	2-178530240-C-T	TTN	NM_001267550.2	c.106374+1G>A_p.?	1	ESS	splice_donor_variant	In358/359	NC_000002.12:g.178530240C>T	NC_000002.12(NM_001267550.2):c.106374+1G>A	NP_001254479.2:p.(?)	LIKELY_PATHOGENIC	PVS1,PM2_supporting
2	178568485	TG	T	2-178568485-TG-T	TTN	NM_001267550.2	c.77646del_p.Ile25883SerfsTer4	1	FS	frameshift_variant	Ex326	NC_000002.12:g.178568486del	NC_000002.12(NM_001267550.2):c.77646del	NP_001254479.2:p.(Ile25883SerfsTer4)	LIKELY_PATHOGENIC	PVS1,PM2_supporting,PP5
2	178740812	G	A	2-178740812-G-A	TTN	NM_001267550.2	c.12421C>T_p.Gln4141Ter	1	SG	stop_gained	Ex48	NC_000002.12:g.178740812G>A	NC_000002.12(NM_001267550.2):c.12421C>T	NP_001254479.2:p.(Gln4141Ter)	LIKELY_PATHOGENIC	PVS1,PM2_supporting
2	178793475	G	A	2-178793475-G-A	TTN	NM_001267550.2	c.1465C>T_p.Gln489Ter	1	SG	stop_gained	Ex9	NC_000002.12:g.178793475G>A	NC_000002.12(NM_001267550.2):c.1465C>T	NP_001254479.2:p.(Gln489Ter)	LIKELY_PATHOGENIC	PVS1,PM2_supporting
2	178640631	C	CT	2-178640631-C-CT	TTN	NM_001267550.2	c.40634-2dup_p.?	1	ESS	splice_acceptor_variant	In220/221	NC_000002.12:g.178640631_178640632insT	NC_000002.12(NM_001267550.2):c.40634-2dup	NP_001254479.2:p.(?)	LIKELY_PATHOGENIC	PVS1,PM2_supporting
2	178566793	T	A	2-178566793-T-A	TTN	NM_001267550.2	c.79339A>T_p.Arg26447Ter	1	SG	stop_gained	Ex326	NC_000002.12:g.178566793T>A	NC_000002.12(NM_001267550.2):c.79339A>T	NP_001254479.2:p.(Arg26447Ter)	LIKELY_PATHOGENIC	PVS1,PM2_supporting
2	178569624	TC	T	2-178569624-TC-T	TTN	NM_001267550.2	c.76507del_p.Glu25503LysfsTer3	1	FS	frameshift_variant	Ex326	NC_000002.12:g.178569625del	NC_000002.12(NM_001267550.2):c.76507del	NP_001254479.2:p.(Glu25503LysfsTer3)	PATHOGENIC	PVS1,PM2_supporting,PP5,PS4_supporting
2	178599660	G	T	2-178599660-G-T	TTN	NM_001267550.2	c.56241C>A_p.Cys18747Ter	1	SG	stop_gained	Ex289	NC_000002.12:g.178599660G>T	NC_000002.12(NM_001267550.2):c.56241C>A	NP_001254479.2:p.(Cys18747Ter)	LIKELY_PATHOGENIC	PVS1,PM2_supporting
2	178569745	TATTA	T	2-178569745-TATTA-T	TTN	NM_001267550.2	c.76383_76386del_p.Asn25462LysfsTer4	1	FS	frameshift_variant	Ex326	NC_000002.12:g.178569746_178569749del	NC_000002.12(NM_001267550.2):c.76383_76386del	NP_001254479.2:p.(Asn25462LysfsTer4)	PATHOGENIC	PVS1,PM2_supporting,PP5,PS4_supporting
2	178569891	A	AC	2-178569891-A-AC	TTN	NM_001267550.2	c.76240dup_p.Val25414GlyfsTer19	1	FS	frameshift_variant	Ex326	NC_000002.12:g.178569891_178569892insC	NC_000002.12(NM_001267550.2):c.76240dup	NP_001254479.2:p.(Val25414GlyfsTer19)	LIKELY_PATHOGENIC	PVS1,PM2_supporting,PP5
2	178569952	A	AAGGAGGGCTTGGTTCACTAAGTT	2-178569952-A-AAGGAGGGCTTGGTTCACTAAGTT	TTN	NM_001267550.2	c.76179_76180insAACTTAGTGAACCAAGCCCTCCT_p.Ser25394AsnfsTer30	1	FS	frameshift_variant	Ex326	NC_000002.12:g.178569952_178569953insAGGAGGGCTTGGTTCACTAAGTT	NC_000002.12(NM_001267550.2):c.76179_76180insAACTTAGTGAACCAAGCCCTCCT	NP_001254479.2:p.(Ser25394AsnfsTer30)	LIKELY_PATHOGENIC	PVS1,PM2_supporting,PP5
2	178605048	G	T	2-178605048-G-T	TTN	NM_001267550.2	c.54129C>A_p.Tyr18043Ter	1	SG	stop_gained	Ex280	NC_000002.12:g.178605048G>T	NC_000002.12(NM_001267550.2):c.54129C>A	NP_001254479.2:p.(Tyr18043Ter)	LIKELY_PATHOGENIC	PVS1,PM2_supporting
2	178570021	CTA	C	2-178570021-CTA-C	TTN	NM_001267550.2	c.76109_76110del_p.Ile25370ArgfsTer6	1	FS	frameshift_variant	Ex326	NC_000002.12:g.178570022_178570023del	NC_000002.12(NM_001267550.2):c.76109_76110del	NP_001254479.2:p.(Ile25370ArgfsTer6)	PATHOGENIC	PVS1,PM2_supporting,PS4_supporting
2	178609920	C	CT	2-178609920-C-CT	TTN	NM_001267550.2	c.51502_51503insA_p.Trp17168Ter	1	SG	frameshift_variant|stop_gained	Ex272	NC_000002.12:g.178609920_178609921insT	NC_000002.12(NM_001267550.2):c.51502_51503insA	NP_001254479.2:p.(Trp17168Ter)	LIKELY_PATHOGENIC	PVS1,PM2_supporting
2	178609572	T	C	2-178609572-T-C	TTN	NM_001267550.2	c.51740-2A>G_p.?	1	ESS	splice_acceptor_variant	In272/273	NC_000002.12:g.178609572T>C	NC_000002.12(NM_001267550.2):c.51740-2A>G	NP_001254479.2:p.(?)	LIKELY_PATHOGENIC	PVS1,PM2_supporting
2	178570183	TC	T	2-178570183-TC-T	TTN	NM_001267550.2	c.75948del_p.Thr25317ProfsTer5	1	FS	frameshift_variant	Ex326	NC_000002.12:g.178570184del	NC_000002.12(NM_001267550.2):c.75948del	NP_001254479.2:p.(Thr25317ProfsTer5)	LIKELY_PATHOGENIC	PVS1,PM2_supporting
2	178554640	G	T	2-178554640-G-T	TTN	NM_001267550.2	c.88707C>A_p.Tyr29569Ter	1	SG	stop_gained	Ex332	NC_000002.12:g.178554640G>T	NC_000002.12(NM_001267550.2):c.88707C>A	NP_001254479.2:p.(Tyr29569Ter)	LIKELY_PATHOGENIC	PVS1,PM2_supporting
2	178784068	A	G	2-178784068-A-G	TTN	NM_001267550.2	c.2775+2T>C_p.?	1	ESS	splice_donor_variant	In16/17	NC_000002.12:g.178784068A>G	NC_000002.12(NM_001267550.2):c.2775+2T>C	NP_001254479.2:p.(?)	LIKELY_PATHOGENIC	PVS1,PM2_supporting
2	178570586	GTAATT	G	2-178570586-GTAATT-G	TTN	NM_001267550.2	c.75541_75545del_p.Asn25181HisfsTer21	1	FS	frameshift_variant	Ex326	NC_000002.12:g.178570587_178570591del	NC_000002.12(NM_001267550.2):c.75541_75545del	NP_001254479.2:p.(Asn25181HisfsTer21)	LIKELY_PATHOGENIC	PVS1,PM2_supporting
2	178570797	C	CTT	2-178570797-C-CTT	TTN	NM_001267550.2	c.75333_75334dup_p.Ser25112LysfsTer36	1	FS	frameshift_variant	Ex326	NC_000002.12:g.178570797_178570798insTT	NC_000002.12(NM_001267550.2):c.75333_75334dup	NP_001254479.2:p.(Ser25112LysfsTer36)	LIKELY_PATHOGENIC	PVS1,PM2_supporting,PP5
2	178570990	ATTCT	A	2-178570990-ATTCT-A	TTN	NM_001267550.2	c.75138_75141del_p.Lys25046AsnfsTer8	1	FS	frameshift_variant	Ex326	NC_000002.12:g.178570991_178570994del	NC_000002.12(NM_001267550.2):c.75138_75141del	NP_001254479.2:p.(Lys25046AsnfsTer8)	PATHOGENIC	PVS1,PM2_supporting,PP5,PS4_moderate
2	178633046	T	C	2-178633046-T-C	TTN	NM_001267550.2	c.43087-2A>G_p.?	1	ESS	splice_acceptor_variant	In233/234	NC_000002.12:g.178633046T>C	NC_000002.12(NM_001267550.2):c.43087-2A>G	NP_001254479.2:p.(?)	LIKELY_PATHOGENIC	PVS1,PM2_supporting
2	178532485	G	T	2-178532485-G-T	TTN	NM_001267550.2	c.104130C>A_p.Tyr34710Ter	1	SG	stop_gained	Ex358	NC_000002.12:g.178532485G>T	NC_000002.12(NM_001267550.2):c.104130C>A	NP_001254479.2:p.(Tyr34710Ter)	LIKELY_PATHOGENIC	PVS1,PM2_supporting
2	178773562	AG	A	2-178773562-AG-A	TTN	NM_001267550.2	c.7493del_p.Thr2498IlefsTer5	1	FS	frameshift_variant	Ex32	NC_000002.12:g.178773563del	NC_000002.12(NM_001267550.2):c.7493del	NP_001254479.2:p.(Thr2498IlefsTer5)	LIKELY_PATHOGENIC	PVS1,PM2_supporting,PP5
2	178571364	TCCCTGGA	T	2-178571364-TCCCTGGA-T	TTN	NM_001267550.2	c.74761_74767del_p.Ser24921ThrfsTer23	1	FS	frameshift_variant	Ex326	NC_000002.12:g.178571365_178571371del	NC_000002.12(NM_001267550.2):c.74761_74767del	NP_001254479.2:p.(Ser24921ThrfsTer23)	PATHOGENIC	PVS1,PM2_supporting,PS4_supporting
2	178571372	G	GT	2-178571372-G-GT	TTN	NM_001267550.2	c.74759_74760insA_p.Ser24921LeufsTer11	1	FS	frameshift_variant	Ex326	NC_000002.12:g.178571372_178571373insT	NC_000002.12(NM_001267550.2):c.74759_74760insA	NP_001254479.2:p.(Ser24921LeufsTer11)	PATHOGENIC	PVS1,PM2_supporting,PS4_supporting
2	178571793	CGG	C	2-178571793-CGG-C	TTN	NM_001267550.2	c.74337_74338del_p.Cys24779TrpfsTer10	1	FS	frameshift_variant	Ex326	NC_000002.12:g.178571794_178571795del	NC_000002.12(NM_001267550.2):c.74337_74338del	NP_001254479.2:p.(Cys24779TrpfsTer10)	LIKELY_PATHOGENIC	PVS1,PM2_supporting
2	178740834	G	T	2-178740834-G-T	TTN	NM_001267550.2	c.12399C>A_p.Cys4133Ter	1	SG	stop_gained	Ex48	NC_000002.12:g.178740834G>T	NC_000002.12(NM_001267550.2):c.12399C>A	NP_001254479.2:p.(Cys4133Ter)	LIKELY_PATHOGENIC	PVS1,PM2_supporting
2	178782211	C	T	2-178782211-C-T	TTN	NM_001267550.2	c.3380+1G>A_p.?	1	ESS	splice_donor_variant	In20/21	NC_000002.12:g.178782211C>T	NC_000002.12(NM_001267550.2):c.3380+1G>A	NP_001254479.2:p.(?)	LIKELY_PATHOGENIC	PVS1,PM2_supporting
2	178613865	TCA	T	2-178613865-TCA-T	TTN	NM_001267550.2	c.49416_49417del_p.Cys16472Ter	1	SG	frameshift_variant|stop_gained	Ex263	NC_000002.12:g.178613866_178613867del	NC_000002.12(NM_001267550.2):c.49416_49417del	NP_001254479.2:p.(Cys16472Ter)	LIKELY_PATHOGENIC	PVS1,PM2_supporting
2	178571874	TTA	T	2-178571874-TTA-T	TTN	NM_001267550.2	c.74256_74257del_p.Asp24752GlufsTer9	1	FS	frameshift_variant	Ex326	NC_000002.12:g.178571875_178571876del	NC_000002.12(NM_001267550.2):c.74256_74257del	NP_001254479.2:p.(Asp24752GlufsTer9)	LIKELY_PATHOGENIC	PVS1,PM2_supporting
2	178621742	C	A	2-178621742-C-A	TTN	NM_001267550.2	c.45083-1G>T_p.?	1	ESS	splice_acceptor_variant	In244/245	NC_000002.12:g.178621742C>A	NC_000002.12(NM_001267550.2):c.45083-1G>T	NP_001254479.2:p.(?)	LIKELY_PATHOGENIC	PVS1,PM2_supporting
2	178572007	CGATCACTGGCACACTCAGTTGTCTAG	C	2-178572007-CGATCACTGGCACACTCAGTTGTCTAG-C	TTN	NM_001267550.2	c.74099_74124del_p.Pro24700ArgfsTer23	1	FS	frameshift_variant	Ex326	NC_000002.12:g.178572008_178572033del	NC_000002.12(NM_001267550.2):c.74099_74124del	NP_001254479.2:p.(Pro24700ArgfsTer23)	LIKELY_PATHOGENIC	PVS1,PM2_supporting,PP5
2	178566149	G	C	2-178566149-G-C	TTN	NM_001267550.2	c.79983C>G_p.Tyr26661Ter	1	SG	stop_gained	Ex326	NC_000002.12:g.178566149G>C	NC_000002.12(NM_001267550.2):c.79983C>G	NP_001254479.2:p.(Tyr26661Ter)	LIKELY_PATHOGENIC	PVS1,PM2_supporting
2	178572127	CTG	C	2-178572127-CTG-C	TTN	NM_001267550.2	c.74003_74004del_p.Thr24668SerfsTer5	1	FS	frameshift_variant	Ex326	NC_000002.12:g.178572128_178572129del	NC_000002.12(NM_001267550.2):c.74003_74004del	NP_001254479.2:p.(Thr24668SerfsTer5)	LIKELY_PATHOGENIC	PVS1,PM2_supporting
2	178572309	GC	G	2-178572309-GC-G	TTN	NM_001267550.2	c.73822del_p.Ala24608GlnfsTer4	1	FS	frameshift_variant	Ex326	NC_000002.12:g.178572310del	NC_000002.12(NM_001267550.2):c.73822del	NP_001254479.2:p.(Ala24608GlnfsTer4)	LIKELY_PATHOGENIC	PVS1,PM2_supporting
2	178634786	G	A	2-178634786-G-A	TTN	NM_001267550.2	c.42088C>T_p.Gln14030Ter	1	SG	stop_gained	Ex229	NC_000002.12:g.178634786G>A	NC_000002.12(NM_001267550.2):c.42088C>T	NP_001254479.2:p.(Gln14030Ter)	LIKELY_PATHOGENIC	PVS1,PM2_supporting
2	178593016	C	T	2-178593016-C-T	TTN	NM_001267550.2	c.59103G>A_p.Trp19701Ter	1	SG	stop_gained	Ex300	NC_000002.12:g.178593016C>T	NC_000002.12(NM_001267550.2):c.59103G>A	NP_001254479.2:p.(Trp19701Ter)	LIKELY_PATHOGENIC	PVS1,PM2_supporting
2	178773679	G	GCC	2-178773679-G-GCC	TTN	NM_001267550.2	c.7375_7376dup_p.Thr2460AlafsTer15	1	FS	frameshift_variant	Ex32	NC_000002.12:g.178773679_178773680insCC	NC_000002.12(NM_001267550.2):c.7375_7376dup	NP_001254479.2:p.(Thr2460AlafsTer15)	LIKELY_PATHOGENIC	PVS1,PM2_supporting
2	178558237	T	C	2-178558237-T-C	TTN	NM_001267550.2	c.87119-2A>G_p.?	1	ESS	splice_acceptor_variant	In327/328	NC_000002.12:g.178558237T>C	NC_000002.12(NM_001267550.2):c.87119-2A>G	NP_001254479.2:p.(?)	LIKELY_PATHOGENIC	PVS1,PM2_supporting
2	178768671	A	G	2-178768671-A-G	TTN	NM_001267550.2	c.9163+2T>C_p.?	1	ESS	splice_donor_variant	In38/39	NC_000002.12:g.178768671A>G	NC_000002.12(NM_001267550.2):c.9163+2T>C	NP_001254479.2:p.(?)	LIKELY_PATHOGENIC	PVS1,PM2_supporting
2	178538690	T	A	2-178538690-T-A	TTN	NM_001267550.2	c.99139A>T_p.Lys33047Ter	1	SG	stop_gained	Ex354	NC_000002.12:g.178538690T>A	NC_000002.12(NM_001267550.2):c.99139A>T	NP_001254479.2:p.(Lys33047Ter)	LIKELY_PATHOGENIC	PVS1,PM2_supporting
2	178572728	T	TTC	2-178572728-T-TTC	TTN	NM_001267550.2	c.73402_73403dup_p.Ser24469AsnfsTer3	1	FS	frameshift_variant	Ex326	NC_000002.12:g.178572728_178572729insTC	NC_000002.12(NM_001267550.2):c.73402_73403dup	NP_001254479.2:p.(Ser24469AsnfsTer3)	LIKELY_PATHOGENIC	PVS1,PM2_supporting
2	178572734	AT	A	2-178572734-AT-A	TTN	NM_001267550.2	c.73397del_p.His24466LeufsTer5	1	FS	frameshift_variant	Ex326	NC_000002.12:g.178572735del	NC_000002.12(NM_001267550.2):c.73397del	NP_001254479.2:p.(His24466LeufsTer5)	LIKELY_PATHOGENIC	PVS1,PM2_supporting
2	178540372	T	C	2-178540372-T-C	TTN	NM_001267550.2	c.97796-2A>G_p.?	1	ESS	splice_acceptor_variant	In350/351	NC_000002.12:g.178540372T>C	NC_000002.12(NM_001267550.2):c.97796-2A>G	NP_001254479.2:p.(?)	LIKELY_PATHOGENIC	PVS1,PM2_supporting
2	178579007	C	A	2-178579007-C-A	TTN	NM_001267550.2	c.68023G>T_p.Glu22675Ter	1	SG	stop_gained	Ex320	NC_000002.12:g.178579007C>A	NC_000002.12(NM_001267550.2):c.68023G>T	NP_001254479.2:p.(Glu22675Ter)	LIKELY_PATHOGENIC	PVS1,PM2_supporting
2	178533234	G	A	2-178533234-G-A	TTN	NM_001267550.2	c.103381C>T_p.Gln34461Ter	1	SG	stop_gained	Ex358	NC_000002.12:g.178533234G>A	NC_000002.12(NM_001267550.2):c.103381C>T	NP_001254479.2:p.(Gln34461Ter)	LIKELY_PATHOGENIC	PVS1,PM2_supporting
2	178774375	C	A	2-178774375-C-A	TTN	NM_001267550.2	c.6889G>T_p.Gly2297Ter	1	SG	stop_gained	Ex30	NC_000002.12:g.178774375C>A	NC_000002.12(NM_001267550.2):c.6889G>T	NP_001254479.2:p.(Gly2297Ter)	LIKELY_PATHOGENIC	PVS1,PM2_supporting
2	178578183	ACCCT	A	2-178578183-ACCCT-A	TTN	NM_001267550.2	c.68330-2_68331del_p.?	1	ESS	splice_donor_variant	In321/322-Ex322	NC_000002.12:g.178578184_178578187del	NC_000002.12(NM_001267550.2):c.68330-2_68331del	NP_001254479.2:p.(?)	LIKELY_PATHOGENIC	PVS1,PM2_supporting
2	178530659	C	T	2-178530659-C-T	TTN	NM_001267550.2	c.105956G>A_p.Trp35319Ter	1	SG	stop_gained	Ex358	NC_000002.12:g.178530659C>T	NC_000002.12(NM_001267550.2):c.105956G>A	NP_001254479.2:p.(Trp35319Ter)	LIKELY_PATHOGENIC	PVS1,PM2_supporting
2	178573182	G	GT	2-178573182-G-GT	TTN	NM_001267550.2	c.72949_72950insA_p.Ala24317AspfsTer3	1	FS	frameshift_variant	Ex326	NC_000002.12:g.178573182_178573183insT	NC_000002.12(NM_001267550.2):c.72949_72950insA	NP_001254479.2:p.(Ala24317AspfsTer3)	LIKELY_PATHOGENIC	PVS1,PM2_supporting
2	178573188	TA	T	2-178573188-TA-T	TTN	NM_001267550.2	c.72943del_p.Tyr24315ThrfsTer88	1	FS	frameshift_variant	Ex326	NC_000002.12:g.178573189del	NC_000002.12(NM_001267550.2):c.72943del	NP_001254479.2:p.(Tyr24315ThrfsTer88)	LIKELY_PATHOGENIC	PVS1,PM2_supporting
2	178573292	TAAATC	T	2-178573292-TAAATC-T	TTN	NM_001267550.2	c.72835_72839del_p.Asp24279LysfsTer3	1	FS	frameshift_variant	Ex326	NC_000002.12:g.178573293_178573297del	NC_000002.12(NM_001267550.2):c.72835_72839del	NP_001254479.2:p.(Asp24279LysfsTer3)	LIKELY_PATHOGENIC	PVS1,PM2_supporting
2	178622000	C	T	2-178622000-C-T	TTN	NM_001267550.2	c.44922G>A_p.Trp14974Ter	1	SG	stop_gained	Ex244	NC_000002.12:g.178622000C>T	NC_000002.12(NM_001267550.2):c.44922G>A	NP_001254479.2:p.(Trp14974Ter)	LIKELY_PATHOGENIC	PVS1,PM2_supporting
2	178573462	CA	C	2-178573462-CA-C	TTN	NM_001267550.2	c.72669del_p.Asp24224IlefsTer8	1	FS	frameshift_variant	Ex326	NC_000002.12:g.178573463del	NC_000002.12(NM_001267550.2):c.72669del	NP_001254479.2:p.(Asp24224IlefsTer8)	PATHOGENIC	PVS1,PM2_supporting,PS3_supporting(PP->PM),PS4_moderate
2	178641239	A	G	2-178641239-A-G	TTN	NM_001267550.2	c.40633+2T>C_p.?	1	ESS	splice_donor_variant	In220/221	NC_000002.12:g.178641239A>G	NC_000002.12(NM_001267550.2):c.40633+2T>C	NP_001254479.2:p.(?)	LIKELY_PATHOGENIC	PVS1,PM2_supporting
2	178573501	A	AT	2-178573501-A-AT	TTN	NM_001267550.2	c.72630dup_p.Ser24211IlefsTer14	1	FS	frameshift_variant	Ex326	NC_000002.12:g.178573501_178573502insT	NC_000002.12(NM_001267550.2):c.72630dup	NP_001254479.2:p.(Ser24211IlefsTer14)	LIKELY_PATHOGENIC	PVS1,PM2_supporting,PP5
2	178573518	AC	A	2-178573518-AC-A	TTN	NM_001267550.2	c.72613del_p.Val24205TrpfsTer13	1	FS	frameshift_variant	Ex326	NC_000002.12:g.178573519del	NC_000002.12(NM_001267550.2):c.72613del	NP_001254479.2:p.(Val24205TrpfsTer13)	LIKELY_PATHOGENIC	PVS1,PM2_supporting,PP5
2	178590146	G	A	2-178590146-G-A	TTN	NM_001267550.2	c.61579C>T_p.Gln20527Ter	1	SG	stop_gained	Ex304	NC_000002.12:g.178590146G>A	NC_000002.12(NM_001267550.2):c.61579C>T	NP_001254479.2:p.(Gln20527Ter)	LIKELY_PATHOGENIC	PVS1,PM2_supporting
2	178573619	TG	T	2-178573619-TG-T	TTN	NM_001267550.2	c.72512del_p.Thr24171LysfsTer3	1	FS	frameshift_variant	Ex326	NC_000002.12:g.178573620del	NC_000002.12(NM_001267550.2):c.72512del	NP_001254479.2:p.(Thr24171LysfsTer3)	LIKELY_PATHOGENIC	PVS1,PM2_supporting
2	178573638	GT	G	2-178573638-GT-G	TTN	NM_001267550.2	c.72493del_p.Thr24165ProfsTer9	1	FS	frameshift_variant	Ex326	NC_000002.12:g.178573639del	NC_000002.12(NM_001267550.2):c.72493del	NP_001254479.2:p.(Thr24165ProfsTer9)	LIKELY_PATHOGENIC	PVS1,PM2_supporting
2	178570376	C	T	2-178570376-C-T	TTN	NM_001267550.2	c.75756G>A_p.Trp25252Ter	1	SG	stop_gained	Ex326	NC_000002.12:g.178570376C>T	NC_000002.12(NM_001267550.2):c.75756G>A	NP_001254479.2:p.(Trp25252Ter)	LIKELY_PATHOGENIC	PVS1,PM2_supporting
2	178574497	CT	C	2-178574497-CT-C	TTN	NM_001267550.2	c.71634del_p.Ala23879LeufsTer2	1	FS	frameshift_variant	Ex326	NC_000002.12:g.178574498del	NC_000002.12(NM_001267550.2):c.71634del	NP_001254479.2:p.(Ala23879LeufsTer2)	LIKELY_PATHOGENIC	PVS1,PM2_supporting,PP5
2	178574577	GA	G	2-178574577-GA-G	TTN	NM_001267550.2	c.71554del_p.Ser23852LeufsTer8	1	FS	frameshift_variant	Ex326	NC_000002.12:g.178574578del	NC_000002.12(NM_001267550.2):c.71554del	NP_001254479.2:p.(Ser23852LeufsTer8)	LIKELY_PATHOGENIC	PVS1,PM2_supporting
2	178774019	ACTTT	A	2-178774019-ACTTT-A	TTN	NM_001267550.2	c.7145_7148del_p.Glu2382ValfsTer7	1	FS	frameshift_variant	Ex31	NC_000002.12:g.178774020_178774023del	NC_000002.12(NM_001267550.2):c.7145_7148del	NP_001254479.2:p.(Glu2382ValfsTer7)	LIKELY_PATHOGENIC	PVS1,PM2_supporting
2	178574985	C	CA	2-178574985-C-CA	TTN	NM_001267550.2	c.71146_71147insT_p.Gly23716ValfsTer2	1	FS	frameshift_variant	Ex326	NC_000002.12:g.178574985_178574986insA	NC_000002.12(NM_001267550.2):c.71146_71147insT	NP_001254479.2:p.(Gly23716ValfsTer2)	LIKELY_PATHOGENIC	PVS1,PM2_supporting
2	178574995	CT	C	2-178574995-CT-C	TTN	NM_001267550.2	c.71136del_p.Gly23713GlufsTer32	1	FS	frameshift_variant	Ex326	NC_000002.12:g.178574996del	NC_000002.12(NM_001267550.2):c.71136del	NP_001254479.2:p.(Gly23713GlufsTer32)	LIKELY_PATHOGENIC	PVS1,PM2_supporting
2	178575124	CT	C	2-178575124-CT-C	TTN	NM_001267550.2	c.71007del_p.Gly23670GlufsTer22	1	FS	frameshift_variant	Ex326	NC_000002.12:g.178575125del	NC_000002.12(NM_001267550.2):c.71007del	NP_001254479.2:p.(Gly23670GlufsTer22)	LIKELY_PATHOGENIC	PVS1,PM2_supporting,PP5
2	178575268	CG	C	2-178575268-CG-C	TTN	NM_001267550.2	c.70863del_p.Val23622SerfsTer44	1	FS	frameshift_variant	Ex326	NC_000002.12:g.178575269del	NC_000002.12(NM_001267550.2):c.70863del	NP_001254479.2:p.(Val23622SerfsTer44)	LIKELY_PATHOGENIC	PVS1,PM2_supporting
2	178575377	C	CA	2-178575377-C-CA	TTN	NM_001267550.2	c.70754dup_p.Lys23586GlufsTer12	1	FS	frameshift_variant	Ex326	NC_000002.12:g.178575377_178575378insA	NC_000002.12(NM_001267550.2):c.70754dup	NP_001254479.2:p.(Lys23586GlufsTer12)	LIKELY_PATHOGENIC	PVS1,PM2_supporting,PP5
2	178575559	C	CTG	2-178575559-C-CTG	TTN	NM_001267550.2	c.70571_70572dup_p.Glu23525GlnfsTer4	1	FS	frameshift_variant	Ex326	NC_000002.12:g.178575559_178575560insTG	NC_000002.12(NM_001267550.2):c.70571_70572dup	NP_001254479.2:p.(Glu23525GlnfsTer4)	LIKELY_PATHOGENIC	PVS1,PM2_supporting,PP5
2	178575619	AT	A	2-178575619-AT-A	TTN	NM_001267550.2	c.70512del_p.Glu23504AspfsTer6	1	FS	frameshift_variant	Ex326	NC_000002.12:g.178575620del	NC_000002.12(NM_001267550.2):c.70512del	NP_001254479.2:p.(Glu23504AspfsTer6)	LIKELY_PATHOGENIC	PVS1,PM2_supporting
2	178774276	T	TGGTCCTCCCAA	2-178774276-T-TGGTCCTCCCAA	TTN	NM_001267550.2	c.6987_6988insTTGGGAGGACC_p.Lys2330LeufsTer24	1	FS	frameshift_variant	Ex30	NC_000002.12:g.178774276_178774277insGGTCCTCCCAA	NC_000002.12(NM_001267550.2):c.6987_6988insTTGGGAGGACC	NP_001254479.2:p.(Lys2330LeufsTer24)	LIKELY_PATHOGENIC	PVS1,PM2_supporting
2	178774276	T	TGACCAGGA	2-178774276-T-TGACCAGGA	TTN	NM_001267550.2	c.6987_6988insTCCTGGTC_p.Lys2330SerfsTer23	1	FS	frameshift_variant	Ex30	NC_000002.12:g.178774276_178774277insGACCAGGA	NC_000002.12(NM_001267550.2):c.6987_6988insTCCTGGTC	NP_001254479.2:p.(Lys2330SerfsTer23)	LIKELY_PATHOGENIC	PVS1,PM2_supporting
2	178774279	T	TCCTGG	2-178774279-T-TCCTGG	TTN	NM_001267550.2	c.6984_6985insCCAGG_p.Thr2329ProfsTer23	1	FS	frameshift_variant	Ex30	NC_000002.12:g.178774279_178774280insCCTGG	NC_000002.12(NM_001267550.2):c.6984_6985insCCAGG	NP_001254479.2:p.(Thr2329ProfsTer23)	LIKELY_PATHOGENIC	PVS1,PM2_supporting
2	178771472	C	G	2-178771472-C-G	TTN	NM_001267550.2	c.7856-1G>C_p.?	1	ESS	splice_acceptor_variant	In33/34	NC_000002.12:g.178771472C>G	NC_000002.12(NM_001267550.2):c.7856-1G>C	NP_001254479.2:p.(?)	LIKELY_PATHOGENIC	PVS1,PM2_supporting
2	178576581	TC	T	2-178576581-TC-T	TTN	NM_001267550.2	c.69662del_p.Gly23221GlufsTer13	1	FS	frameshift_variant	Ex325	NC_000002.12:g.178576582del	NC_000002.12(NM_001267550.2):c.69662del	NP_001254479.2:p.(Gly23221GlufsTer13)	LIKELY_PATHOGENIC	PVS1,PM2_supporting,PP5
2	178576773	AG	A	2-178576773-AG-A	TTN	NM_001267550.2	c.69470del_p.Thr23157MetfsTer20	1	FS	frameshift_variant	Ex325	NC_000002.12:g.178576774del	NC_000002.12(NM_001267550.2):c.69470del	NP_001254479.2:p.(Thr23157MetfsTer20)	LIKELY_PATHOGENIC	PVS1,PM2_supporting
2	178576813	TC	T	2-178576813-TC-T	TTN	NM_001267550.2	c.69430del_p.Glu23144LysfsTer33	1	FS	frameshift_variant	Ex325	NC_000002.12:g.178576814del	NC_000002.12(NM_001267550.2):c.69430del	NP_001254479.2:p.(Glu23144LysfsTer33)	LIKELY_PATHOGENIC	PVS1,PM2_supporting
2	178577077	C	CAA	2-178577077-C-CAA	TTN	NM_001267550.2	c.69256_69257dup_p.Leu23086PhefsTer33	1	FS	frameshift_variant	Ex324	NC_000002.12:g.178577077_178577078insAA	NC_000002.12(NM_001267550.2):c.69256_69257dup	NP_001254479.2:p.(Leu23086PhefsTer33)	LIKELY_PATHOGENIC	PVS1,PM2_supporting,PP5
2	178577092	TTC	T	2-178577092-TTC-T	TTN	NM_001267550.2	c.69241_69242del_p.Glu23081AsnfsTer11	1	FS	frameshift_variant	Ex324	NC_000002.12:g.178577093_178577094del	NC_000002.12(NM_001267550.2):c.69241_69242del	NP_001254479.2:p.(Glu23081AsnfsTer11)	LIKELY_PATHOGENIC	PVS1,PM2_supporting,PP5
2	178577120	AT	A	2-178577120-AT-A	TTN	NM_001267550.2	c.69214del_p.Ile23072LeufsTer46	1	FS	frameshift_variant	Ex324	NC_000002.12:g.178577121del	NC_000002.12(NM_001267550.2):c.69214del	NP_001254479.2:p.(Ile23072LeufsTer46)	LIKELY_PATHOGENIC	PVS1,PM2_supporting,PP5
2	178577446	G	GGTAT	2-178577446-G-GGTAT	TTN	NM_001267550.2	c.68885_68888dup_p.Ile22964TyrfsTer8	1	FS	frameshift_variant	Ex324	NC_000002.12:g.178577446_178577447insGTAT	NC_000002.12(NM_001267550.2):c.68885_68888dup	NP_001254479.2:p.(Ile22964TyrfsTer8)	LIKELY_PATHOGENIC	PVS1,PM2_supporting,PP5,PS4_NA(BP->PP)
2	178560716	C	T	2-178560716-C-T	TTN	NM_001267550.2	c.85416G>A_p.Trp28472Ter	1	SG	stop_gained	Ex326	NC_000002.12:g.178560716C>T	NC_000002.12(NM_001267550.2):c.85416G>A	NP_001254479.2:p.(Trp28472Ter)	LIKELY_PATHOGENIC	PVS1,PM2_supporting
2	178593960	C	T	2-178593960-C-T	TTN	NM_001267550.2	c.58432+1G>A_p.?	1	ESS	splice_donor_variant	In297/298	NC_000002.12:g.178593960C>T	NC_000002.12(NM_001267550.2):c.58432+1G>A	NP_001254479.2:p.(?)	LIKELY_PATHOGENIC	PVS1,PM2_supporting
2	178577450	TC	T	2-178577450-TC-T	TTN	NM_001267550.2	c.68884del_p.Asp22962IlefsTer5	1	FS	frameshift_variant	Ex324	NC_000002.12:g.178577451del	NC_000002.12(NM_001267550.2):c.68884del	NP_001254479.2:p.(Asp22962IlefsTer5)	LIKELY_PATHOGENIC	PVS1,PM2_supporting
2	178613159	A	T	2-178613159-A-T	TTN	NM_001267550.2	c.49648+2T>A_p.?	1	ESS	splice_donor_variant	In264/265	NC_000002.12:g.178613159A>T	NC_000002.12(NM_001267550.2):c.49648+2T>A	NP_001254479.2:p.(?)	LIKELY_PATHOGENIC	PVS1,PM2_supporting
2	178578119	CT	C	2-178578119-CT-C	TTN	NM_001267550.2	c.68395del_p.Arg22799GlyfsTer2	1	FS	frameshift_variant	Ex322	NC_000002.12:g.178578120del	NC_000002.12(NM_001267550.2):c.68395del	NP_001254479.2:p.(Arg22799GlyfsTer2)	LIKELY_PATHOGENIC	PVS1,PM2_supporting
2	178578127	AGTCTT	A	2-178578127-AGTCTT-A	TTN	NM_001267550.2	c.68383_68387del_p.Lys22795SerfsTer8	1	FS	frameshift_variant	Ex322	NC_000002.12:g.178578128_178578132del	NC_000002.12(NM_001267550.2):c.68383_68387del	NP_001254479.2:p.(Lys22795SerfsTer8)	LIKELY_PATHOGENIC	PVS1,PM2_supporting,PP5
2	178740643	A	T	2-178740643-A-T	TTN	NM_001267550.2	c.12590T>A_p.Leu4197Ter	1	SG	stop_gained	Ex48	NC_000002.12:g.178740643A>T	NC_000002.12(NM_001267550.2):c.12590T>A	NP_001254479.2:p.(Leu4197Ter)	LIKELY_PATHOGENIC	PVS1,PM2_supporting
2	178578631	GT	G	2-178578631-GT-G	TTN	NM_001267550.2	c.68308del_p.Thr22770LeufsTer29	1	FS	frameshift_variant	Ex321	NC_000002.12:g.178578632del	NC_000002.12(NM_001267550.2):c.68308del	NP_001254479.2:p.(Thr22770LeufsTer29)	LIKELY_PATHOGENIC	PVS1,PM2_supporting,PP5
2	178609482	G	T	2-178609482-G-T	TTN	NM_001267550.2	c.51828C>A_p.Tyr17276Ter	1	SG	stop_gained	Ex273	NC_000002.12:g.178609482G>T	NC_000002.12(NM_001267550.2):c.51828C>A	NP_001254479.2:p.(Tyr17276Ter)	LIKELY_PATHOGENIC	PVS1,PM2_supporting
2	178774438	TG	T	2-178774438-TG-T	TTN	NM_001267550.2	c.6825del_p.Asp2275GlufsTer2	1	FS	frameshift_variant	Ex30	NC_000002.12:g.178774439del	NC_000002.12(NM_001267550.2):c.6825del	NP_001254479.2:p.(Asp2275GlufsTer2)	LIKELY_PATHOGENIC	PVS1,PM2_supporting,PP5,PS4_NA(BP->PP)
2	178578959	AC	A	2-178578959-AC-A	TTN	NM_001267550.2	c.68070del_p.Lys22690AsnfsTer3	1	FS	frameshift_variant	Ex320	NC_000002.12:g.178578960del	NC_000002.12(NM_001267550.2):c.68070del	NP_001254479.2:p.(Lys22690AsnfsTer3)	LIKELY_PATHOGENIC	PVS1,PM2_supporting
2	178579115	T	TTATGGAGA	2-178579115-T-TTATGGAGA	TTN	NM_001267550.2	c.67907_67914dup_p.Lys22639SerfsTer3	1	FS	frameshift_variant	Ex320	NC_000002.12:g.178579115_178579116insTATGGAGA	NC_000002.12(NM_001267550.2):c.67907_67914dup	NP_001254479.2:p.(Lys22639SerfsTer3)	LIKELY_PATHOGENIC	PVS1,PM2_supporting,PP5
2	178579120	G	GAGAT	2-178579120-G-GAGAT	TTN	NM_001267550.2	c.67906_67909dup_p.Ser22637TyrfsTer19	1	FS	frameshift_variant	Ex320	NC_000002.12:g.178579120_178579121insAGAT	NC_000002.12(NM_001267550.2):c.67906_67909dup	NP_001254479.2:p.(Ser22637TyrfsTer19)	LIKELY_PATHOGENIC	PVS1,PM2_supporting,PP5
2	178579125	A	AGTTC	2-178579125-A-AGTTC	TTN	NM_001267550.2	c.67901_67904dup_p.Ile22636AsnfsTer20	1	FS	frameshift_variant	Ex320	NC_000002.12:g.178579125_178579126insGTTC	NC_000002.12(NM_001267550.2):c.67901_67904dup	NP_001254479.2:p.(Ile22636AsnfsTer20)	LIKELY_PATHOGENIC	PVS1,PM2_supporting,PP5
2	178570851	G	C	2-178570851-G-C	TTN	NM_001267550.2	c.75281C>G_p.Ser25094Ter	1	SG	stop_gained	Ex326	NC_000002.12:g.178570851G>C	NC_000002.12(NM_001267550.2):c.75281C>G	NP_001254479.2:p.(Ser25094Ter)	LIKELY_PATHOGENIC	PVS1,PM2_supporting
2	178549364	A	T	2-178549364-A-T	TTN	NM_001267550.2	c.92262T>A_p.Tyr30754Ter	1	SG	stop_gained	Ex339	NC_000002.12:g.178549364A>T	NC_000002.12(NM_001267550.2):c.92262T>A	NP_001254479.2:p.(Tyr30754Ter)	LIKELY_PATHOGENIC	PVS1,PM2_supporting
2	178579126	GTTCC	G	2-178579126-GTTCC-G	TTN	NM_001267550.2	c.67900_67903del_p.Gly22634LeufsTer4	1	FS	frameshift_variant	Ex320	NC_000002.12:g.178579127_178579130del	NC_000002.12(NM_001267550.2):c.67900_67903del	NP_001254479.2:p.(Gly22634LeufsTer4)	LIKELY_PATHOGENIC	PVS1,PM2_supporting
2	178774943	CG	C	2-178774943-CG-C	TTN	NM_001267550.2	c.6767del_p.Thr2256ArgfsTer15	1	FS	frameshift_variant	Ex29	NC_000002.12:g.178774944del	NC_000002.12(NM_001267550.2):c.6767del	NP_001254479.2:p.(Thr2256ArgfsTer15)	LIKELY_PATHOGENIC	PVS1,PM2_supporting
2	178774950	AC	A	2-178774950-AC-A	TTN	NM_001267550.2	c.6760del_p.Val2254SerfsTer17	1	FS	frameshift_variant	Ex29	NC_000002.12:g.178774951del	NC_000002.12(NM_001267550.2):c.6760del	NP_001254479.2:p.(Val2254SerfsTer17)	LIKELY_PATHOGENIC	PVS1,PM2_supporting
2	178580119	CAT	C	2-178580119-CAT-C	TTN	NM_001267550.2	c.67166_67167del_p.Tyr22389CysfsTer6	1	FS	frameshift_variant	Ex318	NC_000002.12:g.178580120_178580121del	NC_000002.12(NM_001267550.2):c.67166_67167del	NP_001254479.2:p.(Tyr22389CysfsTer6)	LIKELY_PATHOGENIC	PVS1,PM2_supporting,PP5
2	178569967	C	A	2-178569967-C-A	TTN	NM_001267550.2	c.76165G>T_p.Glu25389Ter	1	SG	stop_gained	Ex326	NC_000002.12:g.178569967C>A	NC_000002.12(NM_001267550.2):c.76165G>T	NP_001254479.2:p.(Glu25389Ter)	LIKELY_PATHOGENIC	PVS1,PM2_supporting
2	178581634	GAT	G	2-178581634-GAT-G	TTN	NM_001267550.2	c.66632_66633del_p.Asn22211ThrfsTer7	1	FS	frameshift_variant	Ex316	NC_000002.12:g.178581635_178581636del	NC_000002.12(NM_001267550.2):c.66632_66633del	NP_001254479.2:p.(Asn22211ThrfsTer7)	LIKELY_PATHOGENIC	PVS1,PM2_supporting
2	178565652	C	T	2-178565652-C-T	TTN	NM_001267550.2	c.80480G>A_p.Trp26827Ter	1	SG	stop_gained	Ex326	NC_000002.12:g.178565652C>T	NC_000002.12(NM_001267550.2):c.80480G>A	NP_001254479.2:p.(Trp26827Ter)	LIKELY_PATHOGENIC	PVS1,PM2_supporting
2	178610089	C	G	2-178610089-C-G	TTN	NM_001267550.2	c.51436+1G>C_p.?	1	ESS	splice_donor_variant	In271/272	NC_000002.12:g.178610089C>G	NC_000002.12(NM_001267550.2):c.51436+1G>C	NP_001254479.2:p.(?)	LIKELY_PATHOGENIC	PVS1,PM2_supporting
2	178581775	CT	C	2-178581775-CT-C	TTN	NM_001267550.2	c.66492del_p.Val22165TyrfsTer9	1	FS	frameshift_variant	Ex316	NC_000002.12:g.178581776del	NC_000002.12(NM_001267550.2):c.66492del	NP_001254479.2:p.(Val22165TyrfsTer9)	LIKELY_PATHOGENIC	PVS1,PM2_supporting,PP5
2	178582087	CT	C	2-178582087-CT-C	TTN	NM_001267550.2	c.66281del_p.Lys22094SerfsTer18	1	FS	frameshift_variant	Ex315	NC_000002.12:g.178582088del	NC_000002.12(NM_001267550.2):c.66281del	NP_001254479.2:p.(Lys22094SerfsTer18)	LIKELY_PATHOGENIC	PVS1,PM2_supporting
2	178582392	CTA	C	2-178582392-CTA-C	TTN	NM_001267550.2	c.66062_66063del_p.Ile22021ArgfsTer4	1	FS	frameshift_variant	Ex314	NC_000002.12:g.178582393_178582394del	NC_000002.12(NM_001267550.2):c.66062_66063del	NP_001254479.2:p.(Ile22021ArgfsTer4)	LIKELY_PATHOGENIC	PVS1,PM2_supporting,PP5
2	178582964	CT	C	2-178582964-CT-C	TTN	NM_001267550.2	c.65838del_p.Ala21947ProfsTer8	1	FS	frameshift_variant	Ex313	NC_000002.12:g.178582965del	NC_000002.12(NM_001267550.2):c.65838del	NP_001254479.2:p.(Ala21947ProfsTer8)	LIKELY_PATHOGENIC	PVS1,PM2_supporting
2	178535301	T	A	2-178535301-T-A	TTN	NM_001267550.2	c.101314A>T_p.Lys33772Ter	1	SG	stop_gained	Ex358	NC_000002.12:g.178535301T>A	NC_000002.12(NM_001267550.2):c.101314A>T	NP_001254479.2:p.(Lys33772Ter)	LIKELY_PATHOGENIC	PVS1,PM2_supporting
2	178583120	CT	C	2-178583120-CT-C	TTN	NM_001267550.2	c.65682del_p.Val21895PhefsTer10	1	FS	frameshift_variant	Ex313	NC_000002.12:g.178583121del	NC_000002.12(NM_001267550.2):c.65682del	NP_001254479.2:p.(Val21895PhefsTer10)	LIKELY_PATHOGENIC	PVS1,PM2_supporting
2	178583650	TG	T	2-178583650-TG-T	TTN	NM_001267550.2	c.65531del_p.Pro21844HisfsTer9	1	FS	frameshift_variant	Ex312	NC_000002.12:g.178583651del	NC_000002.12(NM_001267550.2):c.65531del	NP_001254479.2:p.(Pro21844HisfsTer9)	LIKELY_PATHOGENIC	PVS1,PM2_supporting,PP5
2	178583676	CA	C	2-178583676-CA-C	TTN	NM_001267550.2	c.65505del_p.Ile21835MetfsTer6	1	FS	frameshift_variant	Ex312	NC_000002.12:g.178583677del	NC_000002.12(NM_001267550.2):c.65505del	NP_001254479.2:p.(Ile21835MetfsTer6)	LIKELY_PATHOGENIC	PVS1,PM2_supporting,PP5
2	178620215	A	G	2-178620215-A-G	TTN	NM_001267550.2	c.46304+2T>C_p.?	1	ESS	splice_donor_variant	In248/249	NC_000002.12:g.178620215A>G	NC_000002.12(NM_001267550.2):c.46304+2T>C	NP_001254479.2:p.(?)	LIKELY_PATHOGENIC	PVS1,PM2_supporting
2	178584754	CTCCT	C	2-178584754-CTCCT-C	TTN	NM_001267550.2	c.64883_64886del_p.Gln21628ArgfsTer67	1	FS	frameshift_variant	Ex310	NC_000002.12:g.178584755_178584758del	NC_000002.12(NM_001267550.2):c.64883_64886del	NP_001254479.2:p.(Gln21628ArgfsTer67)	LIKELY_PATHOGENIC	PVS1,PM2_supporting
2	178586657	CA	C	2-178586657-CA-C	TTN	NM_001267550.2	c.64243del_p.Trp21415GlyfsTer7	1	FS	frameshift_variant	Ex308	NC_000002.12:g.178586658del	NC_000002.12(NM_001267550.2):c.64243del	NP_001254479.2:p.(Trp21415GlyfsTer7)	LIKELY_PATHOGENIC	PVS1,PM2_supporting,PP5
2	178586692	A	AAT	2-178586692-A-AAT	TTN	NM_001267550.2	c.64208_64209insAT_p.Ser21404LeufsTer19	1	FS	frameshift_variant	Ex308	NC_000002.12:g.178586692_178586693insAT	NC_000002.12(NM_001267550.2):c.64208_64209insAT	NP_001254479.2:p.(Ser21404LeufsTer19)	LIKELY_PATHOGENIC	PVS1,PM2_supporting
2	178560341	C	T	2-178560341-C-T	TTN	NM_001267550.2	c.85791G>A_p.Trp28597Ter	1	SG	stop_gained	Ex326	NC_000002.12:g.178560341C>T	NC_000002.12(NM_001267550.2):c.85791G>A	NP_001254479.2:p.(Trp28597Ter)	LIKELY_PATHOGENIC	PVS1,PM2_supporting
2	178586693	G	GA	2-178586693-G-GA	TTN	NM_001267550.2	c.64207_64208insT_p.Thr21403IlefsTer2	1	FS	frameshift_variant	Ex308	NC_000002.12:g.178586693_178586694insA	NC_000002.12(NM_001267550.2):c.64207_64208insT	NP_001254479.2:p.(Thr21403IlefsTer2)	LIKELY_PATHOGENIC	PVS1,PM2_supporting
2	178775454	AC	A	2-178775454-AC-A	TTN	NM_001267550.2	c.6409del_p.Val2137SerfsTer2	1	FS	frameshift_variant	Ex28	NC_000002.12:g.178775455del	NC_000002.12(NM_001267550.2):c.6409del	NP_001254479.2:p.(Val2137SerfsTer2)	LIKELY_PATHOGENIC	PVS1,PM2_supporting,PP5
2	178557556	C	T	2-178557556-C-T	TTN	NM_001267550.2	c.87707-1G>A_p.?	1	ESS	splice_acceptor_variant	In328/329	NC_000002.12:g.178557556C>T	NC_000002.12(NM_001267550.2):c.87707-1G>A	NP_001254479.2:p.(?)	LIKELY_PATHOGENIC	PVS1,PM2_supporting
2	178587228	GT	G	2-178587228-GT-G	TTN	NM_001267550.2	c.63982del_p.Thr21328ProfsTer13	1	FS	frameshift_variant	Ex307	NC_000002.12:g.178587229del	NC_000002.12(NM_001267550.2):c.63982del	NP_001254479.2:p.(Thr21328ProfsTer13)	LIKELY_PATHOGENIC	PVS1,PM2_supporting,PP5
2	178602406	A	T	2-178602406-A-T	TTN	NM_001267550.2	c.54996T>A_p.Cys18332Ter	1	SG	stop_gained	Ex283	NC_000002.12:g.178602406A>T	NC_000002.12(NM_001267550.2):c.54996T>A	NP_001254479.2:p.(Cys18332Ter)	LIKELY_PATHOGENIC	PVS1,PM2_supporting
2	178587629	GT	G	2-178587629-GT-G	TTN	NM_001267550.2	c.63679del_p.Thr21227LeufsTer20	1	FS	frameshift_variant	Ex306	NC_000002.12:g.178587630del	NC_000002.12(NM_001267550.2):c.63679del	NP_001254479.2:p.(Thr21227LeufsTer20)	LIKELY_PATHOGENIC	PVS1,PM2_supporting
2	178544440	C	T	2-178544440-C-T	TTN	NM_001267550.2	c.95789G>A_p.Trp31930Ter	1	SG	stop_gained	Ex345	NC_000002.12:g.178544440C>T	NC_000002.12(NM_001267550.2):c.95789G>A	NP_001254479.2:p.(Trp31930Ter)	LIKELY_PATHOGENIC	PVS1,PM2_supporting
2	178587723	CA	C	2-178587723-CA-C	TTN	NM_001267550.2	c.63585del_p.Phe21195LeufsTer3	1	FS	frameshift_variant	Ex306	NC_000002.12:g.178587724del	NC_000002.12(NM_001267550.2):c.63585del	NP_001254479.2:p.(Phe21195LeufsTer3)	LIKELY_PATHOGENIC	PVS1,PM2_supporting
2	178563959	C	T	2-178563959-C-T	TTN	NM_001267550.2	c.82173G>A_p.Trp27391Ter	1	SG	stop_gained	Ex326	NC_000002.12:g.178563959C>T	NC_000002.12(NM_001267550.2):c.82173G>A	NP_001254479.2:p.(Trp27391Ter)	LIKELY_PATHOGENIC	PVS1,PM2_supporting
2	178591839	C	CTTCA	2-178591839-C-CTTCA	TTN	NM_001267550.2	c.59976_59979dup_p.Val19994Ter	1	SG	frameshift_variant|stop_gained	Ex303	NC_000002.12:g.178591839_178591840insTTCA	NC_000002.12(NM_001267550.2):c.59976_59979dup	NP_001254479.2:p.(Val19994Ter)	LIKELY_PATHOGENIC	PVS1,PM2_supporting
2	178589384	CAGTT	C	2-178589384-CAGTT-C	TTN	NM_001267550.2	c.62337_62340del_p.Thr20780SerfsTer32	1	FS	frameshift_variant	Ex304	NC_000002.12:g.178589385_178589388del	NC_000002.12(NM_001267550.2):c.62337_62340del	NP_001254479.2:p.(Thr20780SerfsTer32)	LIKELY_PATHOGENIC	PVS1,PM2_supporting,PP5
2	178589530	C	CTT	2-178589530-C-CTT	TTN	NM_001267550.2	c.62194_62195insAA_p.Arg20732LysfsTer25	1	FS	frameshift_variant	Ex304	NC_000002.12:g.178589530_178589531insTT	NC_000002.12(NM_001267550.2):c.62194_62195insAA	NP_001254479.2:p.(Arg20732LysfsTer25)	LIKELY_PATHOGENIC	PVS1,PM2_supporting,PP5
2	178770059	C	A	2-178770059-C-A	TTN	NM_001267550.2	c.8641+1G>T_p.?	1	ESS	splice_donor_variant	In36/37	NC_000002.12:g.178770059C>A	NC_000002.12(NM_001267550.2):c.8641+1G>T	NP_001254479.2:p.(?)	LIKELY_PATHOGENIC	PVS1,PM2_supporting
2	178771209	G	A	2-178771209-G-A	TTN	NM_001267550.2	c.8116+2C>T_p.?	1	ESS	splice_donor_variant	In34/35	NC_000002.12:g.178771209G>A	NC_000002.12(NM_001267550.2):c.8116+2C>T	NP_001254479.2:p.(?)	LIKELY_PATHOGENIC	PVS1,PM2_supporting
2	178589610	AACATGATATG	A	2-178589610-AACATGATATG-A	TTN	NM_001267550.2	c.62105_62114del_p.Ser20702LeufsTer51	1	FS	frameshift_variant	Ex304	NC_000002.12:g.178589611_178589620del	NC_000002.12(NM_001267550.2):c.62105_62114del	NP_001254479.2:p.(Ser20702LeufsTer51)	LIKELY_PATHOGENIC	PVS1,PM2_supporting
2	178590368	C	CA	2-178590368-C-CA	TTN	NM_001267550.2	c.61356dup_p.Val20453CysfsTer5	1	FS	frameshift_variant	Ex304	NC_000002.12:g.178590368_178590369insA	NC_000002.12(NM_001267550.2):c.61356dup	NP_001254479.2:p.(Val20453CysfsTer5)	LIKELY_PATHOGENIC	PVS1,PM2_supporting
2	178591268	CTG	C	2-178591268-CTG-C	TTN	NM_001267550.2	c.60455_60456del_p.Thr20152SerfsTer7	1	FS	frameshift_variant	Ex304	NC_000002.12:g.178591269_178591270del	NC_000002.12(NM_001267550.2):c.60455_60456del	NP_001254479.2:p.(Thr20152SerfsTer7)	LIKELY_PATHOGENIC	PVS1,PM2_supporting,PP5
2	178785628	C	A	2-178785628-C-A	TTN	NM_001267550.2	c.2485G>T_p.Gly829Ter	1	SG	stop_gained	Ex15	NC_000002.12:g.178785628C>A	NC_000002.12(NM_001267550.2):c.2485G>T	NP_001254479.2:p.(Gly829Ter)	LIKELY_PATHOGENIC	PVS1,PM2_supporting
2	178591290	G	GTC	2-178591290-G-GTC	TTN	NM_001267550.2	c.60433_60434dup_p.Asp20145GlufsTer19	1	FS	frameshift_variant	Ex304	NC_000002.12:g.178591290_178591291insTC	NC_000002.12(NM_001267550.2):c.60433_60434dup	NP_001254479.2:p.(Asp20145GlufsTer19)	LIKELY_PATHOGENIC	PVS1,PM2_supporting,PP5
2	178753181	C	A	2-178753181-C-A	TTN	NM_001267550.2	c.11255-1G>T_p.?	1	ESS	splice_acceptor_variant	In46/47	NC_000002.12:g.178753181C>A	NC_000002.12(NM_001267550.2):c.11255-1G>T	NP_001254479.2:p.(?)	LIKELY_PATHOGENIC	PVS1,PM2_supporting
2	178613818	T	A	2-178613818-T-A	TTN	NM_001267550.2	c.49465A>T_p.Arg16489Ter	1	SG	stop_gained	Ex263	NC_000002.12:g.178613818T>A	NC_000002.12(NM_001267550.2):c.49465A>T	NP_001254479.2:p.(Arg16489Ter)	LIKELY_PATHOGENIC	PVS1,PM2_supporting
2	178547406	C	A	2-178547406-C-A	TTN	NM_001267550.2	c.94219+1G>T_p.?	1	ESS	splice_donor_variant	In339/340	NC_000002.12:g.178547406C>A	NC_000002.12(NM_001267550.2):c.94219+1G>T	NP_001254479.2:p.(?)	LIKELY_PATHOGENIC	PVS1,PM2_supporting
2	178531374	C	A	2-178531374-C-A	TTN	NM_001267550.2	c.105241G>T_p.Glu35081Ter	1	SG	stop_gained	Ex358	NC_000002.12:g.178531374C>A	NC_000002.12(NM_001267550.2):c.105241G>T	NP_001254479.2:p.(Glu35081Ter)	LIKELY_PATHOGENIC	PVS1,PM2_supporting
2	178591351	TAG	T	2-178591351-TAG-T	TTN	NM_001267550.2	c.60372_60373del_p.His20124GlnfsTer4	1	FS	frameshift_variant	Ex304	NC_000002.12:g.178591352_178591353del	NC_000002.12(NM_001267550.2):c.60372_60373del	NP_001254479.2:p.(His20124GlnfsTer4)	LIKELY_PATHOGENIC	PVS1,PM2_supporting
2	178591354	TGCTCATCGGTTTTAATCTCACTCCCATCG	T	2-178591354-TGCTCATCGGTTTTAATCTCACTCCCATCG-T	TTN	NM_001267550.2	c.60342_60370del_p.Asp20115LeufsTer4	1	FS	frameshift_variant	Ex304	NC_000002.12:g.178591355_178591383del	NC_000002.12(NM_001267550.2):c.60342_60370del	NP_001254479.2:p.(Asp20115LeufsTer4)	LIKELY_PATHOGENIC	PVS1,PM2_supporting
2	178782343	G	GT	2-178782343-G-GT	TTN	NM_001267550.2	c.3248dup_p.Tyr1083Ter	1	SG	frameshift_variant|stop_gained	Ex20	NC_000002.12:g.178782343_178782344insT	NC_000002.12(NM_001267550.2):c.3248dup	NP_001254479.2:p.(Tyr1083Ter)	LIKELY_PATHOGENIC	PVS1,PM2_supporting
2	178592029	G	GTCCATAC	2-178592029-G-GTCCATAC	TTN	NM_001267550.2	c.59868_59874dup_p.Arg19959ValfsTer8	1	FS	frameshift_variant	Ex302	NC_000002.12:g.178592029_178592030insTCCATAC	NC_000002.12(NM_001267550.2):c.59868_59874dup	NP_001254479.2:p.(Arg19959ValfsTer8)	LIKELY_PATHOGENIC	PVS1,PM2_supporting
2	178592064	TA	T	2-178592064-TA-T	TTN	NM_001267550.2	c.59839del_p.Tyr19947ThrfsTer5	1	FS	frameshift_variant	Ex302	NC_000002.12:g.178592065del	NC_000002.12(NM_001267550.2):c.59839del	NP_001254479.2:p.(Tyr19947ThrfsTer5)	LIKELY_PATHOGENIC	PVS1,PM2_supporting
2	178592099	ACT	A	2-178592099-ACT-A	TTN	NM_001267550.2	c.59803_59804del_p.His19936LeufsTer3	1	FS	frameshift_variant	Ex302	NC_000002.12:g.178592100_178592101del	NC_000002.12(NM_001267550.2):c.59803_59804del	NP_001254479.2:p.(His19936LeufsTer3)	LIKELY_PATHOGENIC	PVS1,PM2_supporting,PP5
2	178592140	CG	C	2-178592140-CG-C	TTN	NM_001267550.2	c.59763del_p.Ser19921ArgfsTer21	1	FS	frameshift_variant	Ex302	NC_000002.12:g.178592141del	NC_000002.12(NM_001267550.2):c.59763del	NP_001254479.2:p.(Ser19921ArgfsTer21)	PATHOGENIC	PVS1,PM2_supporting,PP5,PS4_supporting
2	178592652	CAG	C	2-178592652-CAG-C	TTN	NM_001267550.2	c.59351_59352del_p.Pro19784ArgfsTer5	1	FS	frameshift_variant	Ex301	NC_000002.12:g.178592653_178592654del	NC_000002.12(NM_001267550.2):c.59351_59352del	NP_001254479.2:p.(Pro19784ArgfsTer5)	PATHOGENIC	PVS1,PM2_supporting,PP5,PS4_supporting
2	178779366	C	A	2-178779366-C-A	TTN	NM_001267550.2	c.3826G>T_p.Glu1276Ter	1	SG	stop_gained	Ex23	NC_000002.12:g.178779366C>A	NC_000002.12(NM_001267550.2):c.3826G>T	NP_001254479.2:p.(Glu1276Ter)	LIKELY_PATHOGENIC	PVS1,PM2_supporting
2	178592913	AC	A	2-178592913-AC-A	TTN	NM_001267550.2	c.59205del_p.Glu19735AspfsTer24	1	FS	frameshift_variant	Ex300	NC_000002.12:g.178592914del	NC_000002.12(NM_001267550.2):c.59205del	NP_001254479.2:p.(Glu19735AspfsTer24)	PATHOGENIC	PVS1,PM2_supporting,PP5,PS4_supporting
2	178592916	CAG	C	2-178592916-CAG-C	TTN	NM_001267550.2	c.59201_59202del_p.Pro19734ArgfsTer5	1	FS	frameshift_variant	Ex300	NC_000002.12:g.178592917_178592918del	NC_000002.12(NM_001267550.2):c.59201_59202del	NP_001254479.2:p.(Pro19734ArgfsTer5)	PATHOGENIC	PVS1,PM2_supporting,PP5,PS4
2	178553500	A	G	2-178553500-A-G	TTN	NM_001267550.2	c.89503+2T>C_p.?	1	ESS	splice_donor_variant	In334/335	NC_000002.12:g.178553500A>G	NC_000002.12(NM_001267550.2):c.89503+2T>C	NP_001254479.2:p.(?)	LIKELY_PATHOGENIC	PVS1,PM2_supporting
2	178775531	C	T	2-178775531-C-T	TTN	NM_001267550.2	c.6333G>A_p.Trp2111Ter	1	SG	stop_gained	Ex28	NC_000002.12:g.178775531C>T	NC_000002.12(NM_001267550.2):c.6333G>A	NP_001254479.2:p.(Trp2111Ter)	LIKELY_PATHOGENIC	PVS1,PM2_supporting
2	178593255	TTCATACTGACA	T	2-178593255-TTCATACTGACA-T	TTN	NM_001267550.2	c.58942_58952del_p.Cys19648IlefsTer8	1	FS	frameshift_variant	Ex299	NC_000002.12:g.178593256_178593266del	NC_000002.12(NM_001267550.2):c.58942_58952del	NP_001254479.2:p.(Cys19648IlefsTer8)	LIKELY_PATHOGENIC	PVS1,PM2_supporting
2	178635163	A	C	2-178635163-A-C	TTN	NM_001267550.2	c.42024+2T>G_p.?	1	ESS	splice_donor_variant	In228/229	NC_000002.12:g.178635163A>C	NC_000002.12(NM_001267550.2):c.42024+2T>G	NP_001254479.2:p.(?)	LIKELY_PATHOGENIC	PVS1,PM2_supporting
2	178593282	AG	A	2-178593282-AG-A	TTN	NM_001267550.2	c.58925del_p.Pro19642LeufsTer4	1	FS	frameshift_variant	Ex299	NC_000002.12:g.178593283del	NC_000002.12(NM_001267550.2):c.58925del	NP_001254479.2:p.(Pro19642LeufsTer4)	LIKELY_PATHOGENIC	PVS1,PM2_supporting,PP5
2	178776043	T	TCC	2-178776043-T-TCC	TTN	NM_001267550.2	c.5819_5820dup_p.Arg1941GlyfsTer38	1	FS	frameshift_variant	Ex28	NC_000002.12:g.178776043_178776044insCC	NC_000002.12(NM_001267550.2):c.5819_5820dup	NP_001254479.2:p.(Arg1941GlyfsTer38)	LIKELY_PATHOGENIC	PVS1,PM2_supporting
2	178613793	C	T	2-178613793-C-T	TTN	NM_001267550.2	c.49490G>A_p.Trp16497Ter	1	SG	stop_gained	Ex263	NC_000002.12:g.178613793C>T	NC_000002.12(NM_001267550.2):c.49490G>A	NP_001254479.2:p.(Trp16497Ter)	LIKELY_PATHOGENIC	PVS1,PM2_supporting
2	178528605	C	A	2-178528605-C-A	TTN	NM_001267550.2	c.107146G>T_p.Gly35716Ter	1	SG	stop_gained	Ex360	NC_000002.12:g.178528605C>A	NC_000002.12(NM_001267550.2):c.107146G>T	NP_001254479.2:p.(Gly35716Ter)	LIKELY_PATHOGENIC	PVS1,PM2_supporting
2	178767900	A	AT	2-178767900-A-AT	TTN	NM_001267550.2	c.9329dup_p.Tyr3110Ter	1	SG	frameshift_variant|stop_gained	Ex40	NC_000002.12:g.178767900_178767901insT	NC_000002.12(NM_001267550.2):c.9329dup	NP_001254479.2:p.(Tyr3110Ter)	LIKELY_PATHOGENIC	PVS1,PM2_supporting
2	178776055	AC	A	2-178776055-AC-A	TTN	NM_001267550.2	c.5808del_p.Arg1936SerfsTer42	1	FS	frameshift_variant	Ex28	NC_000002.12:g.178776056del	NC_000002.12(NM_001267550.2):c.5808del	NP_001254479.2:p.(Arg1936SerfsTer42)	LIKELY_PATHOGENIC	PVS1,PM2_supporting,PP5
2	178594644	CA	C	2-178594644-CA-C	TTN	NM_001267550.2	c.57849del_p.Val19284TyrfsTer18	1	FS	splice_region_variant|frameshift_variant	Ex296	NC_000002.12:g.178594645del	NC_000002.12(NM_001267550.2):c.57849del	NP_001254479.2:p.(Val19284TyrfsTer18)	LIKELY_PATHOGENIC	PVS1,PM2_supporting,PP5
2	178782805	C	A	2-178782805-C-A	TTN	NM_001267550.2	c.3100+1G>T_p.?	1	ESS	splice_donor_variant	In18/19	NC_000002.12:g.178782805C>A	NC_000002.12(NM_001267550.2):c.3100+1G>T	NP_001254479.2:p.(?)	LIKELY_PATHOGENIC	PVS1,PM2_supporting
2	178595642	CTG	C	2-178595642-CTG-C	TTN	NM_001267550.2	c.57710_57711del_p.Thr19237SerfsTer24	1	FS	frameshift_variant	Ex295	NC_000002.12:g.178595643_178595644del	NC_000002.12(NM_001267550.2):c.57710_57711del	NP_001254479.2:p.(Thr19237SerfsTer24)	LIKELY_PATHOGENIC	PVS1,PM2_supporting,PP5
2	178597747	AT	A	2-178597747-AT-A	TTN	NM_001267550.2	c.57334del_p.Ile19112SerfsTer17	1	FS	frameshift_variant	Ex294	NC_000002.12:g.178597748del	NC_000002.12(NM_001267550.2):c.57334del	NP_001254479.2:p.(Ile19112SerfsTer17)	LIKELY_PATHOGENIC	PVS1,PM2_supporting,PP5
2	178586783	A	C	2-178586783-A-C	TTN	NM_001267550.2	c.64118T>G_p.Leu21373Ter	1	SG	stop_gained	Ex308	NC_000002.12:g.178586783A>C	NC_000002.12(NM_001267550.2):c.64118T>G	NP_001254479.2:p.(Leu21373Ter)	LIKELY_PATHOGENIC	PVS1,PM2_supporting
2	178597982	A	ACT	2-178597982-A-ACT	TTN	NM_001267550.2	c.57186_57187dup_p.Val19063GlufsTer22	1	FS	frameshift_variant	Ex293	NC_000002.12:g.178597982_178597983insCT	NC_000002.12(NM_001267550.2):c.57186_57187dup	NP_001254479.2:p.(Val19063GlufsTer22)	LIKELY_PATHOGENIC	PVS1,PM2_supporting
2	178739183	C	A	2-178739183-C-A	TTN	NM_001267550.2	c.14050G>T_p.Gly4684Ter	1	SG	stop_gained	Ex48	NC_000002.12:g.178739183C>A	NC_000002.12(NM_001267550.2):c.14050G>T	NP_001254479.2:p.(Gly4684Ter)	LIKELY_PATHOGENIC	PVS1,PM2_supporting
2	178598977	A	AT	2-178598977-A-AT	TTN	NM_001267550.2	c.56732dup_p.Asp18911GlufsTer25	1	FS	frameshift_variant	Ex291	NC_000002.12:g.178598977_178598978insT	NC_000002.12(NM_001267550.2):c.56732dup	NP_001254479.2:p.(Asp18911GlufsTer25)	LIKELY_PATHOGENIC	PVS1,PM2_supporting,PP5,PS4_NA(BP->PP)
2	178599015	TA	T	2-178599015-TA-T	TTN	NM_001267550.2	c.56694del_p.Asn18899ThrfsTer3	1	FS	frameshift_variant	Ex291	NC_000002.12:g.178599016del	NC_000002.12(NM_001267550.2):c.56694del	NP_001254479.2:p.(Asn18899ThrfsTer3)	LIKELY_PATHOGENIC	PVS1,PM2_supporting
2	178610991	A	G	2-178610991-A-G	TTN	NM_001267550.2	c.51136+2T>C_p.?	1	ESS	splice_donor_variant	In270/271	NC_000002.12:g.178610991A>G	NC_000002.12(NM_001267550.2):c.51136+2T>C	NP_001254479.2:p.(?)	LIKELY_PATHOGENIC	PVS1,PM2_supporting
2	178599216	GATTCGGAATACAT	G	2-178599216-GATTCGGAATACAT-G	TTN	NM_001267550.2	c.56564_56576del_p.Tyr18855SerfsTer38	1	FS	frameshift_variant	Ex290	NC_000002.12:g.178599217_178599229del	NC_000002.12(NM_001267550.2):c.56564_56576del	NP_001254479.2:p.(Tyr18855SerfsTer38)	LIKELY_PATHOGENIC	PVS1,PM2_supporting,PP5
2	178566420	A	T	2-178566420-A-T	TTN	NM_001267550.2	c.79712T>A_p.Leu26571Ter	1	SG	stop_gained	Ex326	NC_000002.12:g.178566420A>T	NC_000002.12(NM_001267550.2):c.79712T>A	NP_001254479.2:p.(Leu26571Ter)	LIKELY_PATHOGENIC	PVS1,PM2_supporting
2	178640046	A	G	2-178640046-A-G	TTN	NM_001267550.2	c.40786+2T>C_p.?	1	ESS	splice_donor_variant	In222/223	NC_000002.12:g.178640046A>G	NC_000002.12(NM_001267550.2):c.40786+2T>C	NP_001254479.2:p.(?)	LIKELY_PATHOGENIC	PVS1,PM2_supporting
2	178640539	A	T	2-178640539-A-T	TTN	NM_001267550.2	c.40723+2T>A_p.?	1	ESS	splice_donor_variant	In221/222	NC_000002.12:g.178640539A>T	NC_000002.12(NM_001267550.2):c.40723+2T>A	NP_001254479.2:p.(?)	LIKELY_PATHOGENIC	PVS1,PM2_supporting
2	178740272	T	A	2-178740272-T-A	TTN	NM_001267550.2	c.12961A>T_p.Arg4321Ter	1	SG	stop_gained	Ex48	NC_000002.12:g.178740272T>A	NC_000002.12(NM_001267550.2):c.12961A>T	NP_001254479.2:p.(Arg4321Ter)	LIKELY_PATHOGENIC	PVS1,PM2_supporting
2	178621583	C	A	2-178621583-C-A	TTN	NM_001267550.2	c.45241G>T_p.Glu15081Ter	1	SG	stop_gained	Ex245	NC_000002.12:g.178621583C>A	NC_000002.12(NM_001267550.2):c.45241G>T	NP_001254479.2:p.(Glu15081Ter)	LIKELY_PATHOGENIC	PVS1,PM2_supporting
2	178599684	GT	G	2-178599684-GT-G	TTN	NM_001267550.2	c.56216del_p.Asn18739ThrfsTer5	1	FS	frameshift_variant	Ex289	NC_000002.12:g.178599685del	NC_000002.12(NM_001267550.2):c.56216del	NP_001254479.2:p.(Asn18739ThrfsTer5)	LIKELY_PATHOGENIC	PVS1,PM2_supporting
2	178740445	A	T	2-178740445-A-T	TTN	NM_001267550.2	c.12788T>A_p.Leu4263Ter	1	SG	stop_gained	Ex48	NC_000002.12:g.178740445A>T	NC_000002.12(NM_001267550.2):c.12788T>A	NP_001254479.2:p.(Leu4263Ter)	LIKELY_PATHOGENIC	PVS1,PM2_supporting
2	178607571	C	T	2-178607571-C-T	TTN	NM_001267550.2	c.53117G>A_p.Trp17706Ter	1	SG	stop_gained	Ex277	NC_000002.12:g.178607571C>T	NC_000002.12(NM_001267550.2):c.53117G>A	NP_001254479.2:p.(Trp17706Ter)	LIKELY_PATHOGENIC	PVS1,PM2_supporting
2	178778873	C	T	2-178778873-C-T	TTN	NM_001267550.2	c.4208+1G>A_p.?	1	ESS	splice_donor_variant	In24/25	NC_000002.12:g.178778873C>T	NC_000002.12(NM_001267550.2):c.4208+1G>A	NP_001254479.2:p.(?)	LIKELY_PATHOGENIC	PVS1,PM2_supporting
2	178599771	AC	A	2-178599771-AC-A	TTN	NM_001267550.2	c.56129del_p.Gly18710ValfsTer7	1	FS	frameshift_variant	Ex289	NC_000002.12:g.178599772del	NC_000002.12(NM_001267550.2):c.56129del	NP_001254479.2:p.(Gly18710ValfsTer7)	LIKELY_PATHOGENIC	PVS1,PM2_supporting
2	178601396	CCA	C	2-178601396-CCA-C	TTN	NM_001267550.2	c.55599_55600del_p.Cys18533TrpfsTer9	1	FS	frameshift_variant	Ex287	NC_000002.12:g.178601397_178601398del	NC_000002.12(NM_001267550.2):c.55599_55600del	NP_001254479.2:p.(Cys18533TrpfsTer9)	LIKELY_PATHOGENIC	PVS1,PM2_supporting
2	178776321	TC	T	2-178776321-TC-T	TTN	NM_001267550.2	c.5542del_p.Glu1848SerfsTer17	1	FS	frameshift_variant	Ex28	NC_000002.12:g.178776322del	NC_000002.12(NM_001267550.2):c.5542del	NP_001254479.2:p.(Glu1848SerfsTer17)	LIKELY_PATHOGENIC	PVS1,PM2_supporting
2	178602404	TC	T	2-178602404-TC-T	TTN	NM_001267550.2	c.54997del_p.Glu18333AsnfsTer7	1	FS	frameshift_variant	Ex283	NC_000002.12:g.178602405del	NC_000002.12(NM_001267550.2):c.54997del	NP_001254479.2:p.(Glu18333AsnfsTer7)	LIKELY_PATHOGENIC	PVS1,PM2_supporting
2	178602409	G	GATTA	2-178602409-G-GATTA	TTN	NM_001267550.2	c.54992_54993insTAAT_p.Cys18332AsnfsTer3	1	FS	frameshift_variant	Ex283	NC_000002.12:g.178602409_178602410insATTA	NC_000002.12(NM_001267550.2):c.54992_54993insTAAT	NP_001254479.2:p.(Cys18332AsnfsTer3)	LIKELY_PATHOGENIC	PVS1,PM2_supporting
2	178602440	CTT	C	2-178602440-CTT-C	TTN	NM_001267550.2	c.54960_54961del_p.Arg18321SerfsTer3	1	FS	frameshift_variant	Ex283	NC_000002.12:g.178602441_178602442del	NC_000002.12(NM_001267550.2):c.54960_54961del	NP_001254479.2:p.(Arg18321SerfsTer3)	PATHOGENIC	PVS1,PM2_supporting,PS4_supporting
2	178602545	T	TTCGTTTTATCTTTAACTTCTGGGCAAGAAGGTGGCCCCGGTGGAACTAATAACAAAAGAAAAAAAAAAGCTTCATCAGA	2-178602545-T-TTCGTTTTATCTTTAACTTCTGGGCAAGAAGGTGGCCCCGGTGGAACTAATAACAAAAGAAAAAAAAAAGCTTCATCAGA	TTN	NM_001267550.2	c.54812-34_54856dup_p.Lys18286IlefsTer2	1	FS	frameshift_variant	Ex283	NC_000002.12:g.178602545_178602546insTCGTTTTATCTTTAACTTCTGGGCAAGAAGGTGGCCCCGGTGGAACTAATAACAAAAGAAAAAAAAAAGCTTCATCAGA	NC_000002.12(NM_001267550.2):c.54812-34_54856dup	NP_001254479.2:p.(Lys18286IlefsTer2)	LIKELY_PATHOGENIC	PVS1,PM2_supporting
2	178775051	G	C	2-178775051-G-C	TTN	NM_001267550.2	c.6660C>G_p.Tyr2220Ter	1	SG	stop_gained	Ex29	NC_000002.12:g.178775051G>C	NC_000002.12(NM_001267550.2):c.6660C>G	NP_001254479.2:p.(Tyr2220Ter)	LIKELY_PATHOGENIC	PVS1,PM2_supporting
2	178769940	C	G	2-178769940-C-G	TTN	NM_001267550.2	c.8642-1G>C_p.?	1	ESS	splice_acceptor_variant	In36/37	NC_000002.12:g.178769940C>G	NC_000002.12(NM_001267550.2):c.8642-1G>C	NP_001254479.2:p.(?)	LIKELY_PATHOGENIC	PVS1,PM2_supporting
2	178578962	T	A	2-178578962-T-A	TTN	NM_001267550.2	c.68068A>T_p.Lys22690Ter	1	SG	stop_gained	Ex320	NC_000002.12:g.178578962T>A	NC_000002.12(NM_001267550.2):c.68068A>T	NP_001254479.2:p.(Lys22690Ter)	LIKELY_PATHOGENIC	PVS1,PM2_supporting
2	178583228	C	T	2-178583228-C-T	TTN	NM_001267550.2	c.65576-1G>A_p.?	1	ESS	splice_acceptor_variant	In312/313	NC_000002.12:g.178583228C>T	NC_000002.12(NM_001267550.2):c.65576-1G>A	NP_001254479.2:p.(?)	LIKELY_PATHOGENIC	PVS1,PM2_supporting
2	178607783	A	G	2-178607783-A-G	TTN	NM_001267550.2	c.53002+2T>C_p.?	1	ESS	splice_donor_variant	In276/277	NC_000002.12:g.178607783A>G	NC_000002.12(NM_001267550.2):c.53002+2T>C	NP_001254479.2:p.(?)	LIKELY_PATHOGENIC	PVS1,PM2_supporting
2	178561163	A	C	2-178561163-A-C	TTN	NM_001267550.2	c.84969T>G_p.Tyr28323Ter	1	SG	stop_gained	Ex326	NC_000002.12:g.178561163A>C	NC_000002.12(NM_001267550.2):c.84969T>G	NP_001254479.2:p.(Tyr28323Ter)	LIKELY_PATHOGENIC	PVS1,PM2_supporting
2	178603990	CA	C	2-178603990-CA-C	TTN	NM_001267550.2	c.54696del_p.Asn18232LysfsTer18	1	FS	frameshift_variant	Ex282	NC_000002.12:g.178603991del	NC_000002.12(NM_001267550.2):c.54696del	NP_001254479.2:p.(Asn18232LysfsTer18)	LIKELY_PATHOGENIC	PVS1,PM2_supporting
2	178605064	TC	T	2-178605064-TC-T	TTN	NM_001267550.2	c.54112del_p.Glu18038ArgfsTer47	1	FS	frameshift_variant	Ex280	NC_000002.12:g.178605065del	NC_000002.12(NM_001267550.2):c.54112del	NP_001254479.2:p.(Glu18038ArgfsTer47)	LIKELY_PATHOGENIC	PVS1,PM2_supporting,PP5,PS4_NA(BP->PP)
2	178539182	C	T	2-178539182-C-T	TTN	NM_001267550.2	c.98753G>A_p.Trp32918Ter	1	SG	stop_gained	Ex353	NC_000002.12:g.178539182C>T	NC_000002.12(NM_001267550.2):c.98753G>A	NP_001254479.2:p.(Trp32918Ter)	LIKELY_PATHOGENIC	PVS1,PM2_supporting
2	178605123	CTTGG	C	2-178605123-CTTGG-C	TTN	NM_001267550.2	c.54050_54053del_p.Thr18017ArgfsTer67	1	FS	frameshift_variant	Ex280	NC_000002.12:g.178605124_178605127del	NC_000002.12(NM_001267550.2):c.54050_54053del	NP_001254479.2:p.(Thr18017ArgfsTer67)	LIKELY_PATHOGENIC	PVS1,PM2_supporting
2	178605153	T	TG	2-178605153-T-TG	TTN	NM_001267550.2	c.54023_54024insC_p.Glu18008AspfsTer5	1	FS	frameshift_variant	Ex280	NC_000002.12:g.178605153_178605154insG	NC_000002.12(NM_001267550.2):c.54023_54024insC	NP_001254479.2:p.(Glu18008AspfsTer5)	LIKELY_PATHOGENIC	PVS1,PM2_supporting,PP5
2	178782599	G	C	2-178782599-G-C	TTN	NM_001267550.2	c.3104C>G_p.Ser1035Ter	1	SG	stop_gained	Ex19	NC_000002.12:g.178782599G>C	NC_000002.12(NM_001267550.2):c.3104C>G	NP_001254479.2:p.(Ser1035Ter)	LIKELY_PATHOGENIC	PVS1,PM2_supporting
2	178605275	G	GC	2-178605275-G-GC	TTN	NM_001267550.2	c.53901dup_p.Arg17968AlafsTer12	1	FS	frameshift_variant	Ex280	NC_000002.12:g.178605275_178605276insC	NC_000002.12(NM_001267550.2):c.53901dup	NP_001254479.2:p.(Arg17968AlafsTer12)	PATHOGENIC	PVS1,PM2_supporting,PP5,PS4_supporting
2	178619756	G	A	2-178619756-G-A	TTN	NM_001267550.2	c.46561C>T_p.Gln15521Ter	1	SG	stop_gained	Ex250	NC_000002.12:g.178619756G>A	NC_000002.12(NM_001267550.2):c.46561C>T	NP_001254479.2:p.(Gln15521Ter)	PATHOGENIC	PVS1,PM2_supporting,PP3
2	178544246	C	A	2-178544246-C-A	TTN	NM_001267550.2	c.95983G>T_p.Glu31995Ter	1	SG	stop_gained	Ex345	NC_000002.12:g.178544246C>A	NC_000002.12(NM_001267550.2):c.95983G>T	NP_001254479.2:p.(Glu31995Ter)	PATHOGENIC	PVS1,PM2_supporting,PP3
2	178802317	C	T	2-178802317-C-T	TTN	NM_001267550.2	c.116G>A_p.Trp39Ter	1	SG	stop_gained	Ex3	NC_000002.12:g.178802317C>T	NC_000002.12(NM_001267550.2):c.116G>A	NP_001254479.2:p.(Trp39Ter)	PATHOGENIC	PVS1,PM2_supporting,PP3
2	178607108	C	A	2-178607108-C-A	TTN	NM_001267550.2	c.53494G>T_p.Glu17832Ter	1	SG	stop_gained	Ex278	NC_000002.12:g.178607108C>A	NC_000002.12(NM_001267550.2):c.53494G>T	NP_001254479.2:p.(Glu17832Ter)	PATHOGENIC	PVS1,PM2_supporting,PP3
2	178605524	AC	A	2-178605524-AC-A	TTN	NM_001267550.2	c.53770del_p.Val17924LeufsTer31	1	FS	frameshift_variant	Ex279	NC_000002.12:g.178605525del	NC_000002.12(NM_001267550.2):c.53770del	NP_001254479.2:p.(Val17924LeufsTer31)	LIKELY_PATHOGENIC	PVS1,PM2_supporting,PP5
2	178620249	G	T	2-178620249-G-T	TTN	NM_001267550.2	c.46272C>A_p.Tyr15424Ter	1	SG	stop_gained	Ex248	NC_000002.12:g.178620249G>T	NC_000002.12(NM_001267550.2):c.46272C>A	NP_001254479.2:p.(Tyr15424Ter)	PATHOGENIC	PVS1,PM2_supporting,PP3,PP5
2	178576687	C	T	2-178576687-C-T	TTN	NM_001267550.2	c.69557G>A_p.Trp23186Ter	1	SG	stop_gained	Ex325	NC_000002.12:g.178576687C>T	NC_000002.12(NM_001267550.2):c.69557G>A	NP_001254479.2:p.(Trp23186Ter)	PATHOGENIC	PVS1,PM2_supporting,PP3,PP5
2	178607812	G	A	2-178607812-G-A	TTN	NM_001267550.2	c.52975C>T_p.Gln17659Ter	1	SG	stop_gained	Ex276	NC_000002.12:g.178607812G>A	NC_000002.12(NM_001267550.2):c.52975C>T	NP_001254479.2:p.(Gln17659Ter)	PATHOGENIC	PVS1,PM2_supporting,PP3,PP5,PS4_NA(BP->PP)
2	178740965	G	A	2-178740965-G-A	TTN	NM_001267550.2	c.12268C>T_p.Gln4090Ter	1	SG	stop_gained	Ex48	NC_000002.12:g.178740965G>A	NC_000002.12(NM_001267550.2):c.12268C>T	NP_001254479.2:p.(Gln4090Ter)	LIKELY_PATHOGENIC	PVS1,PM2_supporting,PP5
2	178740116	G	A	2-178740116-G-A	TTN	NM_001267550.2	c.13117C>T_p.Gln4373Ter	1	SG	stop_gained	Ex48	NC_000002.12:g.178740116G>A	NC_000002.12(NM_001267550.2):c.13117C>T	NP_001254479.2:p.(Gln4373Ter)	LIKELY_PATHOGENIC	PVS1,PM2_supporting,PP5
2	178586656	C	T	2-178586656-C-T	TTN	NM_001267550.2	c.64245G>A_p.Trp21415Ter	1	SG	stop_gained	Ex308	NC_000002.12:g.178586656C>T	NC_000002.12(NM_001267550.2):c.64245G>A	NP_001254479.2:p.(Trp21415Ter)	LIKELY_PATHOGENIC	PVS1,PM2_supporting,PP5
2	178569178	CA	C	2-178569178-CA-C	TTN	NM_001267550.2	c.76953del_p.Val25652Ter	1	SG	frameshift_variant|stop_gained	Ex326	NC_000002.12:g.178569179del	NC_000002.12(NM_001267550.2):c.76953del	NP_001254479.2:p.(Val25652Ter)	LIKELY_PATHOGENIC	PVS1,PM2_supporting,PP5
2	178578804	A	G	2-178578804-A-G	TTN	NM_001267550.2	c.68224+2T>C_p.?	1	ESS	splice_donor_variant	In320/321	NC_000002.12:g.178578804A>G	NC_000002.12(NM_001267550.2):c.68224+2T>C	NP_001254479.2:p.(?)	LIKELY_PATHOGENIC	PVS1,PM2_supporting,PP5
2	178607307	AG	A	2-178607307-AG-A	TTN	NM_001267550.2	c.53294del_p.Pro17765LeufsTer7	1	FS	frameshift_variant	Ex278	NC_000002.12:g.178607308del	NC_000002.12(NM_001267550.2):c.53294del	NP_001254479.2:p.(Pro17765LeufsTer7)	LIKELY_PATHOGENIC	PVS1,PM2_supporting,PP5
2	178540194	G	A	2-178540194-G-A	TTN	NM_001267550.2	c.97972C>T_p.Arg32658Ter	1	SG	stop_gained	Ex351	NC_000002.12:g.178540194G>A	NC_000002.12(NM_001267550.2):c.97972C>T	NP_001254479.2:p.(Arg32658Ter)	LIKELY_PATHOGENIC	PVS1,PM2_supporting,PP5
2	178799824	C	T	2-178799824-C-T	TTN	NM_001267550.2	c.669+1G>A_p.?	1	ESS	splice_donor_variant	In5/6	NC_000002.12:g.178799824C>T	NC_000002.12(NM_001267550.2):c.669+1G>A	NP_001254479.2:p.(?)	LIKELY_PATHOGENIC	PVS1,PM2_supporting,PP5
2	178607437	CA	C	2-178607437-CA-C	TTN	NM_001267550.2	c.53250del_p.Cys17750TrpfsTer10	1	FS	frameshift_variant	Ex277	NC_000002.12:g.178607438del	NC_000002.12(NM_001267550.2):c.53250del	NP_001254479.2:p.(Cys17750TrpfsTer10)	LIKELY_PATHOGENIC	PVS1,PM2_supporting
2	178607656	CAG	C	2-178607656-CAG-C	TTN	NM_001267550.2	c.53030_53031del_p.Ser17677CysfsTer14	1	FS	frameshift_variant	Ex277	NC_000002.12:g.178607657_178607658del	NC_000002.12(NM_001267550.2):c.53030_53031del	NP_001254479.2:p.(Ser17677CysfsTer14)	LIKELY_PATHOGENIC	PVS1,PM2_supporting
2	178610102	G	A	2-178610102-G-A	TTN	NM_001267550.2	c.51424C>T_p.Gln17142Ter	1	SG	stop_gained	Ex271	NC_000002.12:g.178610102G>A	NC_000002.12(NM_001267550.2):c.51424C>T	NP_001254479.2:p.(Gln17142Ter)	LIKELY_PATHOGENIC	PVS1,PM2_supporting,PP5
2	178531192	G	GT	2-178531192-G-GT	TTN	NM_001267550.2	c.105422dup_p.Tyr35141Ter	1	SG	frameshift_variant|stop_gained	Ex358	NC_000002.12:g.178531192_178531193insT	NC_000002.12(NM_001267550.2):c.105422dup	NP_001254479.2:p.(Tyr35141Ter)	LIKELY_PATHOGENIC	PVS1,PM2_supporting,PP5
2	178617198	T	A	2-178617198-T-A	TTN	NM_001267550.2	c.47797A>T_p.Arg15933Ter	1	SG	stop_gained	Ex255	NC_000002.12:g.178617198T>A	NC_000002.12(NM_001267550.2):c.47797A>T	NP_001254479.2:p.(Arg15933Ter)	LIKELY_PATHOGENIC	PVS1,PM2_supporting,PP5
2	178607856	A	ACCCGAAG	2-178607856-A-ACCCGAAG	TTN	NM_001267550.2	c.52924_52930dup_p.Val17644AlafsTer24	1	FS	frameshift_variant	Ex276	NC_000002.12:g.178607856_178607857insCCCGAAG	NC_000002.12(NM_001267550.2):c.52924_52930dup	NP_001254479.2:p.(Val17644AlafsTer24)	LIKELY_PATHOGENIC	PVS1,PM2_supporting,PP5
2	178609450	ACATTTTCATC	A	2-178609450-ACATTTTCATC-A	TTN	NM_001267550.2	c.51850_51859del_p.Asp17284LeufsTer32	1	FS	frameshift_variant	Ex273	NC_000002.12:g.178609451_178609460del	NC_000002.12(NM_001267550.2):c.51850_51859del	NP_001254479.2:p.(Asp17284LeufsTer32)	LIKELY_PATHOGENIC	PVS1,PM2_supporting
2	178609471	G	GTAATA	2-178609471-G-GTAATA	TTN	NM_001267550.2	c.51834_51838dup_p.Thr17280IlefsTer5	1	FS	frameshift_variant	Ex273	NC_000002.12:g.178609471_178609472insTAATA	NC_000002.12(NM_001267550.2):c.51834_51838dup	NP_001254479.2:p.(Thr17280IlefsTer5)	LIKELY_PATHOGENIC	PVS1,PM2_supporting,PP5
2	178609523	CA	C	2-178609523-CA-C	TTN	NM_001267550.2	c.51786del_p.Asp17263MetfsTer3	1	FS	frameshift_variant	Ex273	NC_000002.12:g.178609524del	NC_000002.12(NM_001267550.2):c.51786del	NP_001254479.2:p.(Asp17263MetfsTer3)	LIKELY_PATHOGENIC	PVS1,PM2_supporting,PP5
2	178777528	G	A	2-178777528-G-A	TTN	NM_001267550.2	c.4537C>T_p.Gln1513Ter	1	SG	stop_gained	Ex26	NC_000002.12:g.178777528G>A	NC_000002.12(NM_001267550.2):c.4537C>T	NP_001254479.2:p.(Gln1513Ter)	LIKELY_PATHOGENIC	PVS1,PM2_supporting,PP5
2	178609714	T	TGA	2-178609714-T-TGA	TTN	NM_001267550.2	c.51708_51709insTC_p.Thr17237SerfsTer8	1	FS	frameshift_variant	Ex272	NC_000002.12:g.178609714_178609715insGA	NC_000002.12(NM_001267550.2):c.51708_51709insTC	NP_001254479.2:p.(Thr17237SerfsTer8)	LIKELY_PATHOGENIC	PVS1,PM2_supporting
2	178609715	AGC	A	2-178609715-AGC-A	TTN	NM_001267550.2	c.51706_51707del_p.Ala17236TyrfsTer11	1	FS	frameshift_variant	Ex272	NC_000002.12:g.178609716_178609717del	NC_000002.12(NM_001267550.2):c.51706_51707del	NP_001254479.2:p.(Ala17236TyrfsTer11)	LIKELY_PATHOGENIC	PVS1,PM2_supporting
2	178609922	T	TTACAAAGGTACCTCCTATTACAAAGGAG	2-178609922-T-TTACAAAGGTACCTCCTATTACAAAGGAG	TTN	NM_001267550.2	c.51500_51501insCTCCTTTGTAATAGGAGGTACCTTTGTA_p.Trp17168SerfsTer16	1	FS	frameshift_variant	Ex272	NC_000002.12:g.178609922_178609923insTACAAAGGTACCTCCTATTACAAAGGAG	NC_000002.12(NM_001267550.2):c.51500_51501insCTCCTTTGTAATAGGAGGTACCTTTGTA	NP_001254479.2:p.(Trp17168SerfsTer16)	LIKELY_PATHOGENIC	PVS1,PM2_supporting
2	178609489	G	T	2-178609489-G-T	TTN	NM_001267550.2	c.51821C>A_p.Ser17274Ter	1	SG	stop_gained	Ex273	NC_000002.12:g.178609489G>T	NC_000002.12(NM_001267550.2):c.51821C>A	NP_001254479.2:p.(Ser17274Ter)	LIKELY_PATHOGENIC	PVS1,PM2_supporting,PP5
2	178609978	CA	C	2-178609978-CA-C	TTN	NM_001267550.2	c.51444del_p.Asp17149IlefsTer4	1	FS	frameshift_variant	Ex272	NC_000002.12:g.178609979del	NC_000002.12(NM_001267550.2):c.51444del	NP_001254479.2:p.(Asp17149IlefsTer4)	PATHOGENIC	PVS1,PM2_supporting,PP5,PS4_supporting
2	178598059	C	T	2-178598059-C-T	TTN	NM_001267550.2	c.57112-1G>A_p.?	1	ESS	splice_acceptor_variant	In292/293	NC_000002.12:g.178598059C>T	NC_000002.12(NM_001267550.2):c.57112-1G>A	NP_001254479.2:p.(?)	LIKELY_PATHOGENIC	PVS1,PM2_supporting,PP5
2	178610355	ACTTG	A	2-178610355-ACTTG-A	TTN	NM_001267550.2	c.51167_51170del_p.Ala17056ValfsTer10	1	FS	frameshift_variant	Ex271	NC_000002.12:g.178610356_178610359del	NC_000002.12(NM_001267550.2):c.51167_51170del	NP_001254479.2:p.(Ala17056ValfsTer10)	LIKELY_PATHOGENIC	PVS1,PM2_supporting
2	178632201	G	A	2-178632201-G-A	TTN	NM_001267550.2	c.43693C>T_p.Gln14565Ter	1	SG	stop_gained	Ex236	NC_000002.12:g.178632201G>A	NC_000002.12(NM_001267550.2):c.43693C>T	NP_001254479.2:p.(Gln14565Ter)	LIKELY_PATHOGENIC	PVS1,PM2_supporting,PP5
2	178611840	CTG	C	2-178611840-CTG-C	TTN	NM_001267550.2	c.50467_50468del_p.Gln16823ValfsTer6	1	FS	frameshift_variant	Ex268	NC_000002.12:g.178611841_178611842del	NC_000002.12(NM_001267550.2):c.50467_50468del	NP_001254479.2:p.(Gln16823ValfsTer6)	LIKELY_PATHOGENIC	PVS1,PM2_supporting,PP5
2	178607014	CTTTTACCTAGTGGATCAACTGCAA	C	2-178607014-CTTTTACCTAGTGGATCAACTGCAA-C	TTN	NM_001267550.2	c.53564_53581+6del_p.?	1	ESS	splice_acceptor_variant	Ex278-In278/279	NC_000002.12:g.178607015_178607038del	NC_000002.12(NM_001267550.2):c.53564_53581+6del	NP_001254479.2:p.(?)	LIKELY_PATHOGENIC	PVS1,PM2_supporting,PP5
2	178601884	G	A	2-178601884-G-A	TTN	NM_001267550.2	c.55300C>T_p.Gln18434Ter	1	SG	splice_region_variant|stop_gained	Ex285	NC_000002.12:g.178601884G>A	NC_000002.12(NM_001267550.2):c.55300C>T	NP_001254479.2:p.(Gln18434Ter)	LIKELY_PATHOGENIC	PVS1,PM2_supporting,PP5
2	178563133	G	A	2-178563133-G-A	TTN	NM_001267550.2	c.82999C>T_p.Gln27667Ter	1	SG	stop_gained	Ex326	NC_000002.12:g.178563133G>A	NC_000002.12(NM_001267550.2):c.82999C>T	NP_001254479.2:p.(Gln27667Ter)	LIKELY_PATHOGENIC	PVS1,PM2_supporting,PP5
2	178739783	C	A	2-178739783-C-A	TTN	NM_001267550.2	c.13450G>T_p.Glu4484Ter	1	SG	stop_gained	Ex48	NC_000002.12:g.178739783C>A	NC_000002.12(NM_001267550.2):c.13450G>T	NP_001254479.2:p.(Glu4484Ter)	LIKELY_PATHOGENIC	PVS1,PM2_supporting,PP5
2	178618583	C	T	2-178618583-C-T	TTN	NM_001267550.2	c.46966+1G>A_p.?	1	ESS	splice_donor_variant	In251/252	NC_000002.12:g.178618583C>T	NC_000002.12(NM_001267550.2):c.46966+1G>A	NP_001254479.2:p.(?)	LIKELY_PATHOGENIC	PVS1,PM2_supporting,PP5
2	178567934	A	AT	2-178567934-A-AT	TTN	NM_001267550.2	c.78197dup_p.Tyr26066Ter	1	SG	frameshift_variant|stop_gained	Ex326	NC_000002.12:g.178567934_178567935insT	NC_000002.12(NM_001267550.2):c.78197dup	NP_001254479.2:p.(Tyr26066Ter)	LIKELY_PATHOGENIC	PVS1,PM2_supporting,PP5
2	178599851	C	T	2-178599851-C-T	TTN	NM_001267550.2	c.56051-1G>A_p.?	1	ESS	splice_acceptor_variant	In288/289	NC_000002.12:g.178599851C>T	NC_000002.12(NM_001267550.2):c.56051-1G>A	NP_001254479.2:p.(?)	LIKELY_PATHOGENIC	PVS1,PM2_supporting,PP5
2	178776867	G	GT	2-178776867-G-GT	TTN	NM_001267550.2	c.4996dup_p.Thr1666AsnfsTer3	1	FS	frameshift_variant	Ex28	NC_000002.12:g.178776867_178776868insT	NC_000002.12(NM_001267550.2):c.4996dup	NP_001254479.2:p.(Thr1666AsnfsTer3)	LIKELY_PATHOGENIC	PVS1,PM2_supporting
2	178614294	CAT	C	2-178614294-CAT-C	TTN	NM_001267550.2	c.49101_49102del_p.Cys16368SerfsTer10	1	FS	frameshift_variant	Ex262	NC_000002.12:g.178614295_178614296del	NC_000002.12(NM_001267550.2):c.49101_49102del	NP_001254479.2:p.(Cys16368SerfsTer10)	LIKELY_PATHOGENIC	PVS1,PM2_supporting,PP5
2	178614908	GT	G	2-178614908-GT-G	TTN	NM_001267550.2	c.48698del_p.Asn16233ThrfsTer30	1	FS	frameshift_variant	Ex260	NC_000002.12:g.178614909del	NC_000002.12(NM_001267550.2):c.48698del	NP_001254479.2:p.(Asn16233ThrfsTer30)	LIKELY_PATHOGENIC	PVS1,PM2_supporting
2	178741524	A	T	2-178741524-A-T	TTN	NM_001267550.2	c.11709T>A_p.Cys3903Ter	1	SG	stop_gained	Ex48	NC_000002.12:g.178741524A>T	NC_000002.12(NM_001267550.2):c.11709T>A	NP_001254479.2:p.(Cys3903Ter)	LIKELY_PATHOGENIC	PVS1,PM2_supporting,PP5
2	178614921	ACG	A	2-178614921-ACG-A	TTN	NM_001267550.2	c.48684_48685del_p.Val16229GlufsTer9	1	FS	frameshift_variant	Ex260	NC_000002.12:g.178614922_178614923del	NC_000002.12(NM_001267550.2):c.48684_48685del	NP_001254479.2:p.(Val16229GlufsTer9)	LIKELY_PATHOGENIC	PVS1,PM2_supporting
2	178616513	T	TC	2-178616513-T-TC	TTN	NM_001267550.2	c.48277dup_p.Glu16093GlyfsTer12	1	FS	frameshift_variant	Ex257	NC_000002.12:g.178616513_178616514insC	NC_000002.12(NM_001267550.2):c.48277dup	NP_001254479.2:p.(Glu16093GlyfsTer12)	LIKELY_PATHOGENIC	PVS1,PM2_supporting
2	178569395	A	T	2-178569395-A-T	TTN	NM_001267550.2	c.76737T>A_p.Tyr25579Ter	1	SG	stop_gained	Ex326	NC_000002.12:g.178569395A>T	NC_000002.12(NM_001267550.2):c.76737T>A	NP_001254479.2:p.(Tyr25579Ter)	LIKELY_PATHOGENIC	PVS1,PM2_supporting,PP5
2	178616728	C	T	2-178616728-C-T	TTN	NM_001267550.2	c.48160+1G>A_p.?	1	ESS	splice_donor_variant	In256/257	NC_000002.12:g.178616728C>T	NC_000002.12(NM_001267550.2):c.48160+1G>A	NP_001254479.2:p.(?)	LIKELY_PATHOGENIC	PVS1,PM2_supporting,PP5
2	178616860	TTC	T	2-178616860-TTC-T	TTN	NM_001267550.2	c.48027_48028del_p.Lys16010AsnfsTer16	1	FS	frameshift_variant	Ex256	NC_000002.12:g.178616861_178616862del	NC_000002.12(NM_001267550.2):c.48027_48028del	NP_001254479.2:p.(Lys16010AsnfsTer16)	PATHOGENIC	PVS1,PM2_supporting,PP3
2	178617003	T	TG	2-178617003-T-TG	TTN	NM_001267550.2	c.47885dup_p.Met15963AsnfsTer7	1	FS	frameshift_variant	Ex256	NC_000002.12:g.178617003_178617004insG	NC_000002.12(NM_001267550.2):c.47885dup	NP_001254479.2:p.(Met15963AsnfsTer7)	LIKELY_PATHOGENIC	PVS1,PM2_supporting,PP5
2	178777234	CTTTCA	C	2-178777234-CTTTCA-C	TTN	NM_001267550.2	c.4724_4728del_p.Met1575SerfsTer6	1	FS	frameshift_variant	Ex27	NC_000002.12:g.178777235_178777239del	NC_000002.12(NM_001267550.2):c.4724_4728del	NP_001254479.2:p.(Met1575SerfsTer6)	PATHOGENIC	PVS1,PM2_supporting,PS4_moderate(BP->PS)
2	178569034	G	A	2-178569034-G-A	TTN	NM_001267550.2	c.77098C>T_p.Gln25700Ter	1	SG	stop_gained	Ex326	NC_000002.12:g.178569034G>A	NC_000002.12(NM_001267550.2):c.77098C>T	NP_001254479.2:p.(Gln25700Ter)	LIKELY_PATHOGENIC	PVS1,PM2_supporting,PP5
2	178530912	T	A	2-178530912-T-A	TTN	NM_001267550.2	c.105703A>T_p.Lys35235Ter	1	SG	stop_gained	Ex358	NC_000002.12:g.178530912T>A	NC_000002.12(NM_001267550.2):c.105703A>T	NP_001254479.2:p.(Lys35235Ter)	LIKELY_PATHOGENIC	PVS1,PM2_supporting,PP5
2	178782248	C	T	2-178782248-C-T	TTN	NM_001267550.2	c.3344G>A_p.Trp1115Ter	1	SG	stop_gained	Ex20	NC_000002.12:g.178782248C>T	NC_000002.12(NM_001267550.2):c.3344G>A	NP_001254479.2:p.(Trp1115Ter)	LIKELY_PATHOGENIC	PVS1,PM2_supporting,PP5
2	178618266	CG	C	2-178618266-CG-C	TTN	NM_001267550.2	c.47191del_p.Arg15731ValfsTer2	1	FS	frameshift_variant	Ex252	NC_000002.12:g.178618267del	NC_000002.12(NM_001267550.2):c.47191del	NP_001254479.2:p.(Arg15731ValfsTer2)	LIKELY_PATHOGENIC	PVS1,PM2_supporting
2	178528806	CAG	C	2-178528806-CAG-C	TTN	NM_001267550.2	c.106943_106944del_p.Ser35648Ter	1	SG	frameshift_variant|stop_gained	Ex360	NC_000002.12:g.178528807_178528808del	NC_000002.12(NM_001267550.2):c.106943_106944del	NP_001254479.2:p.(Ser35648Ter)	LIKELY_PATHOGENIC	PVS1,PM2_supporting,PP5
2	178557800	C	T	2-178557800-C-T	TTN	NM_001267550.2	c.87554G>A_p.Trp29185Ter	1	SG	stop_gained	Ex328	NC_000002.12:g.178557800C>T	NC_000002.12(NM_001267550.2):c.87554G>A	NP_001254479.2:p.(Trp29185Ter)	LIKELY_PATHOGENIC	PVS1,PM2_supporting,PP5
2	178618388	T	TA	2-178618388-T-TA	TTN	NM_001267550.2	c.47069dup_p.Gly15691ArgfsTer5	1	FS	frameshift_variant	Ex252	NC_000002.12:g.178618388_178618389insA	NC_000002.12(NM_001267550.2):c.47069dup	NP_001254479.2:p.(Gly15691ArgfsTer5)	LIKELY_PATHOGENIC	PVS1,PM2_supporting
2	178618705	AG	A	2-178618705-AG-A	TTN	NM_001267550.2	c.46844del_p.Thr15615IlefsTer11	1	FS	frameshift_variant	Ex251	NC_000002.12:g.178618706del	NC_000002.12(NM_001267550.2):c.46844del	NP_001254479.2:p.(Thr15615IlefsTer11)	LIKELY_PATHOGENIC	PVS1,PM2_supporting
2	178619645	CTTCT	C	2-178619645-CTTCT-C	TTN	NM_001267550.2	c.46668_46671del_p.Glu15557ProfsTer28	1	FS	frameshift_variant	Ex250	NC_000002.12:g.178619646_178619649del	NC_000002.12(NM_001267550.2):c.46668_46671del	NP_001254479.2:p.(Glu15557ProfsTer28)	LIKELY_PATHOGENIC	PVS1,PM2_supporting,PP5
2	178564409	A	T	2-178564409-A-T	TTN	NM_001267550.2	c.81723T>A_p.Tyr27241Ter	1	SG	stop_gained	Ex326	NC_000002.12:g.178564409A>T	NC_000002.12(NM_001267550.2):c.81723T>A	NP_001254479.2:p.(Tyr27241Ter)	LIKELY_PATHOGENIC	PVS1,PM2_supporting,PP5
2	178619742	G	GT	2-178619742-G-GT	TTN	NM_001267550.2	c.46574dup_p.His15525GlnfsTer6	1	FS	frameshift_variant	Ex250	NC_000002.12:g.178619742_178619743insT	NC_000002.12(NM_001267550.2):c.46574dup	NP_001254479.2:p.(His15525GlnfsTer6)	LIKELY_PATHOGENIC	PVS1,PM2_supporting
2	178621258	TC	T	2-178621258-TC-T	TTN	NM_001267550.2	c.45459del_p.Arg15154GlyfsTer23	1	FS	frameshift_variant	Ex246	NC_000002.12:g.178621259del	NC_000002.12(NM_001267550.2):c.45459del	NP_001254479.2:p.(Arg15154GlyfsTer23)	LIKELY_PATHOGENIC	PVS1,PM2_supporting,PP5
2	178621273	GA	G	2-178621273-GA-G	TTN	NM_001267550.2	c.45444del_p.Pro15149GlnfsTer28	1	FS	frameshift_variant	Ex246	NC_000002.12:g.178621274del	NC_000002.12(NM_001267550.2):c.45444del	NP_001254479.2:p.(Pro15149GlnfsTer28)	LIKELY_PATHOGENIC	PVS1,PM2_supporting
2	178617384	C	A	2-178617384-C-A	TTN	NM_001267550.2	c.47701G>T_p.Glu15901Ter	1	SG	stop_gained	Ex254	NC_000002.12:g.178617384C>A	NC_000002.12(NM_001267550.2):c.47701G>T	NP_001254479.2:p.(Glu15901Ter)	LIKELY_PATHOGENIC	PVS1,PM2_supporting,PP5
2	178621503	A	AGAGCT	2-178621503-A-AGAGCT	TTN	NM_001267550.2	c.45316_45320dup_p.Arg15108AlafsTer71	1	FS	frameshift_variant	Ex245	NC_000002.12:g.178621503_178621504insGAGCT	NC_000002.12(NM_001267550.2):c.45316_45320dup	NP_001254479.2:p.(Arg15108AlafsTer71)	PATHOGENIC	PVS1,PM2_supporting,PP5,PS4_supporting
2	178553061	G	A	2-178553061-G-A	TTN	NM_001267550.2	c.89839C>T_p.Arg29947Ter	1	SG	stop_gained	Ex335	NC_000002.12:g.178553061G>A	NC_000002.12(NM_001267550.2):c.89839C>T	NP_001254479.2:p.(Arg29947Ter)	LIKELY_PATHOGENIC	PVS1,PM2_supporting,PP5
2	178621723	G	GT	2-178621723-G-GT	TTN	NM_001267550.2	c.45100dup_p.Thr15034AsnfsTer8	1	FS	frameshift_variant	Ex245	NC_000002.12:g.178621723_178621724insT	NC_000002.12(NM_001267550.2):c.45100dup	NP_001254479.2:p.(Thr15034AsnfsTer8)	PATHOGENIC	PVS1,PM2_supporting,PP5,PS4_supporting
2	178630271	C	CATTG	2-178630271-C-CATTG	TTN	NM_001267550.2	c.44247_44250dup_p.Val14751GlnfsTer3	1	FS	frameshift_variant	Ex239	NC_000002.12:g.178630271_178630272insATTG	NC_000002.12(NM_001267550.2):c.44247_44250dup	NP_001254479.2:p.(Val14751GlnfsTer3)	LIKELY_PATHOGENIC	PVS1,PM2_supporting
2	178620555	C	T	2-178620555-C-T	TTN	NM_001267550.2	c.45966G>A_p.Trp15322Ter	1	SG	stop_gained	Ex248	NC_000002.12:g.178620555C>T	NC_000002.12(NM_001267550.2):c.45966G>A	NP_001254479.2:p.(Trp15322Ter)	LIKELY_PATHOGENIC	PVS1,PM2_supporting,PP5
2	178591146	C	T	2-178591146-C-T	TTN	NM_001267550.2	c.60579G>A_p.Trp20193Ter	1	SG	stop_gained	Ex304	NC_000002.12:g.178591146C>T	NC_000002.12(NM_001267550.2):c.60579G>A	NP_001254479.2:p.(Trp20193Ter)	LIKELY_PATHOGENIC	PVS1,PM2_supporting,PP5
2	178630898	A	ATCACTCCACACTGTGTGTC	2-178630898-A-ATCACTCCACACTGTGTGTC	TTN	NM_001267550.2	c.44059_44060insGACACACAGTGTGGAGTGA_p.Met14687ArgfsTer10	1	FS	frameshift_variant	Ex238	NC_000002.12:g.178630898_178630899insTCACTCCACACTGTGTGTC	NC_000002.12(NM_001267550.2):c.44059_44060insGACACACAGTGTGGAGTGA	NP_001254479.2:p.(Met14687ArgfsTer10)	LIKELY_PATHOGENIC	PVS1,PM2_supporting
2	178572091	G	A	2-178572091-G-A	TTN	NM_001267550.2	c.74041C>T_p.Gln24681Ter	1	SG	stop_gained	Ex326	NC_000002.12:g.178572091G>A	NC_000002.12(NM_001267550.2):c.74041C>T	NP_001254479.2:p.(Gln24681Ter)	LIKELY_PATHOGENIC	PVS1,PM2_supporting,PP5
2	178632635	C	CT	2-178632635-C-CT	TTN	NM_001267550.2	c.43370dup_p.Asp14458GlyfsTer4	1	FS	frameshift_variant	Ex235	NC_000002.12:g.178632635_178632636insT	NC_000002.12(NM_001267550.2):c.43370dup	NP_001254479.2:p.(Asp14458GlyfsTer4)	LIKELY_PATHOGENIC	PVS1,PM2_supporting
2	178789460	ATTGT	A	2-178789460-ATTGT-A	TTN	NM_001267550.2	c.1972_1975del_p.Thr658Ter	1	SG	frameshift_variant|stop_gained	Ex13	NC_000002.12:g.178789461_178789464del	NC_000002.12(NM_001267550.2):c.1972_1975del	NP_001254479.2:p.(Thr658Ter)	LIKELY_PATHOGENIC	PVS1,PM2_supporting,PP5
2	178633489	C	CT	2-178633489-C-CT	TTN	NM_001267550.2	c.42869dup_p.Ala14291GlyfsTer4	1	FS	frameshift_variant	Ex232	NC_000002.12:g.178633489_178633490insT	NC_000002.12(NM_001267550.2):c.42869dup	NP_001254479.2:p.(Ala14291GlyfsTer4)	LIKELY_PATHOGENIC	PVS1,PM2_supporting
2	178554864	C	A	2-178554864-C-A	TTN	NM_001267550.2	c.88594+1G>T_p.?	1	ESS	splice_donor_variant	In331/332	NC_000002.12:g.178554864C>A	NC_000002.12(NM_001267550.2):c.88594+1G>T	NP_001254479.2:p.(?)	LIKELY_PATHOGENIC	PVS1,PM2_supporting,PP5
2	178575256	C	A	2-178575256-C-A	TTN	NM_001267550.2	c.70876G>T_p.Glu23626Ter	1	SG	stop_gained	Ex326	NC_000002.12:g.178575256C>A	NC_000002.12(NM_001267550.2):c.70876G>T	NP_001254479.2:p.(Glu23626Ter)	LIKELY_PATHOGENIC	PVS1,PM2_supporting,PP5
2	178528755	G	A	2-178528755-G-A	TTN	NM_001267550.2	c.106996C>T_p.Gln35666Ter	1	SG	stop_gained	Ex360	NC_000002.12:g.178528755G>A	NC_000002.12(NM_001267550.2):c.106996C>T	NP_001254479.2:p.(Gln35666Ter)	LIKELY_PATHOGENIC	PVS1,PM2_supporting,PP5
2	178633859	G	GA	2-178633859-G-GA	TTN	NM_001267550.2	c.42639dup_p.Gln14214SerfsTer26	1	FS	frameshift_variant	Ex231	NC_000002.12:g.178633859_178633860insA	NC_000002.12(NM_001267550.2):c.42639dup	NP_001254479.2:p.(Gln14214SerfsTer26)	LIKELY_PATHOGENIC	PVS1,PM2_supporting,PP5
2	178634063	AC	A	2-178634063-AC-A	TTN	NM_001267550.2	c.42435del_p.Met14145IlefsTer9	1	FS	frameshift_variant	Ex231	NC_000002.12:g.178634064del	NC_000002.12(NM_001267550.2):c.42435del	NP_001254479.2:p.(Met14145IlefsTer9)	LIKELY_PATHOGENIC	PVS1,PM2_supporting
2	178634390	TCTTCTTGCCCTCCACCTCAG	T	2-178634390-TCTTCTTGCCCTCCACCTCAG-T	TTN	NM_001267550.2	c.42371_42390del_p.Ala14124AspfsTer19	1	FS	frameshift_variant	Ex230	NC_000002.12:g.178634391_178634410del	NC_000002.12(NM_001267550.2):c.42371_42390del	NP_001254479.2:p.(Ala14124AspfsTer19)	LIKELY_PATHOGENIC	PVS1,PM2_supporting,PP5,PS4_NA(BP->PP)
2	178634558	A	AT	2-178634558-A-AT	TTN	NM_001267550.2	c.42222dup_p.Cys14075MetfsTer16	1	FS	frameshift_variant	Ex230	NC_000002.12:g.178634558_178634559insT	NC_000002.12(NM_001267550.2):c.42222dup	NP_001254479.2:p.(Cys14075MetfsTer16)	LIKELY_PATHOGENIC	PVS1,PM2_supporting
2	178580611	T	G	2-178580611-T-G	TTN	NM_001267550.2	c.66770-2A>C_p.?	1	ESS	splice_acceptor_variant	In316/317	NC_000002.12:g.178580611T>G	NC_000002.12(NM_001267550.2):c.66770-2A>C	NP_001254479.2:p.(?)	LIKELY_PATHOGENIC	PVS1,PM2_supporting,PP5
2	178604246	A	T	2-178604246-A-T	TTN	NM_001267550.2	c.54441T>A_p.Tyr18147Ter	1	SG	stop_gained	Ex282	NC_000002.12:g.178604246A>T	NC_000002.12(NM_001267550.2):c.54441T>A	NP_001254479.2:p.(Tyr18147Ter)	LIKELY_PATHOGENIC	PVS1,PM2_supporting,PP5
2	178612431	C	T	2-178612431-C-T	TTN	NM_001267550.2	c.50094G>A_p.Trp16698Ter	1	SG	stop_gained	Ex266	NC_000002.12:g.178612431C>T	NC_000002.12(NM_001267550.2):c.50094G>A	NP_001254479.2:p.(Trp16698Ter)	LIKELY_PATHOGENIC	PVS1,PM2_supporting,PP5
2	178634792	GT	G	2-178634792-GT-G	TTN	NM_001267550.2	c.42081del_p.Lys14027AsnfsTer21	1	FS	frameshift_variant	Ex229	NC_000002.12:g.178634793del	NC_000002.12(NM_001267550.2):c.42081del	NP_001254479.2:p.(Lys14027AsnfsTer21)	LIKELY_PATHOGENIC	PVS1,PM2_supporting
2	178594102	C	CA	2-178594102-C-CA	TTN	NM_001267550.2	c.58290dup_p.Asp19431Ter	1	SG	frameshift_variant|stop_gained	Ex297	NC_000002.12:g.178594102_178594103insA	NC_000002.12(NM_001267550.2):c.58290dup	NP_001254479.2:p.(Asp19431Ter)	LIKELY_PATHOGENIC	PVS1,PM2_supporting,PP5
2	178636087	TG	T	2-178636087-TG-T	TTN	NM_001267550.2	c.41483del_p.Pro13828GlnfsTer6	1	FS	frameshift_variant	Ex226	NC_000002.12:g.178636088del	NC_000002.12(NM_001267550.2):c.41483del	NP_001254479.2:p.(Pro13828GlnfsTer6)	LIKELY_PATHOGENIC	PVS1,PM2_supporting,PP5,PS4_NA(BP->PP)
2	178546832	A	T	2-178546832-A-T	TTN	NM_001267550.2	c.94596T>A_p.Tyr31532Ter	1	SG	stop_gained	Ex341	NC_000002.12:g.178546832A>T	NC_000002.12(NM_001267550.2):c.94596T>A	NP_001254479.2:p.(Tyr31532Ter)	LIKELY_PATHOGENIC	PVS1,PM2_supporting,PP5
2	178535850	C	A	2-178535850-C-A	TTN	NM_001267550.2	c.100766-1G>T_p.?	1	ESS	splice_acceptor_variant	In357/358	NC_000002.12:g.178535850C>A	NC_000002.12(NM_001267550.2):c.100766-1G>T	NP_001254479.2:p.(?)	LIKELY_PATHOGENIC	PVS1,PM2_supporting,PP5
2	178635990	C	A	2-178635990-C-A	TTN	NM_001267550.2	c.41581G>T_p.Glu13861Ter	1	SG	stop_gained	Ex226	NC_000002.12:g.178635990C>A	NC_000002.12(NM_001267550.2):c.41581G>T	NP_001254479.2:p.(Glu13861Ter)	LIKELY_PATHOGENIC	PVS1,PM2_supporting,PP5
2	178636203	C	CT	2-178636203-C-CT	TTN	NM_001267550.2	c.41367dup_p.Val13790SerfsTer20	1	FS	frameshift_variant	Ex226	NC_000002.12:g.178636203_178636204insT	NC_000002.12(NM_001267550.2):c.41367dup	NP_001254479.2:p.(Val13790SerfsTer20)	LIKELY_PATHOGENIC	PVS1,PM2_supporting,PP5
2	178557061	T	TA	2-178557061-T-TA	TTN	NM_001267550.2	c.88092dup_p.Ser29365Ter	1	SG	frameshift_variant|stop_gained	Ex330	NC_000002.12:g.178557061_178557062insA	NC_000002.12(NM_001267550.2):c.88092dup	NP_001254479.2:p.(Ser29365Ter)	LIKELY_PATHOGENIC	PVS1,PM2_supporting,PP5
2	178607686	C	G	2-178607686-C-G	TTN	NM_001267550.2	c.53003-1G>C_p.?	1	ESS	splice_acceptor_variant	In276/277	NC_000002.12:g.178607686C>G	NC_000002.12(NM_001267550.2):c.53003-1G>C	NP_001254479.2:p.(?)	LIKELY_PATHOGENIC	PVS1,PM2_supporting,PP5
2	178618695	G	A	2-178618695-G-A	TTN	NM_001267550.2	c.46855C>T_p.Gln15619Ter	1	SG	stop_gained	Ex251	NC_000002.12:g.178618695G>A	NC_000002.12(NM_001267550.2):c.46855C>T	NP_001254479.2:p.(Gln15619Ter)	LIKELY_PATHOGENIC	PVS1,PM2_supporting,PP5
2	178636424	GTCTTT	G	2-178636424-GTCTTT-G	TTN	NM_001267550.2	c.41298_41302del_p.Glu13766AspfsTer5	1	FS	frameshift_variant	Ex225	NC_000002.12:g.178636425_178636429del	NC_000002.12(NM_001267550.2):c.41298_41302del	NP_001254479.2:p.(Glu13766AspfsTer5)	LIKELY_PATHOGENIC	PVS1,PM2_supporting
2	178611269	T	A	2-178611269-T-A	TTN	NM_001267550.2	c.50860A>T_p.Lys16954Ter	1	SG	splice_region_variant|stop_gained	Ex270	NC_000002.12:g.178611269T>A	NC_000002.12(NM_001267550.2):c.50860A>T	NP_001254479.2:p.(Lys16954Ter)	LIKELY_PATHOGENIC	PVS1,PM2_supporting,PP5
2	178573558	C	A	2-178573558-C-A	TTN	NM_001267550.2	c.72574G>T_p.Glu24192Ter	1	SG	stop_gained	Ex326	NC_000002.12:g.178573558C>A	NC_000002.12(NM_001267550.2):c.72574G>T	NP_001254479.2:p.(Glu24192Ter)	LIKELY_PATHOGENIC	PVS1,PM2_supporting,PP5
2	178641247	G	GT	2-178641247-G-GT	TTN	NM_001267550.2	c.40626dup_p.Pro13543ThrfsTer13	1	FS	frameshift_variant	Ex220	NC_000002.12:g.178641247_178641248insT	NC_000002.12(NM_001267550.2):c.40626dup	NP_001254479.2:p.(Pro13543ThrfsTer13)	PATHOGENIC	PVS1,PM2_supporting,PP5,PS4_supporting
2	178780068	CT	C	2-178780068-CT-C	TTN	NM_001267550.2	c.3660del_p.Glu1221AsnfsTer4	1	FS	frameshift_variant	Ex22	NC_000002.12:g.178780069del	NC_000002.12(NM_001267550.2):c.3660del	NP_001254479.2:p.(Glu1221AsnfsTer4)	LIKELY_PATHOGENIC	PVS1,PM2_supporting
2	178781236	GGTTT	G	2-178781236-GGTTT-G	TTN	NM_001267550.2	c.3404_3407del_p.Gln1135ProfsTer7	1	FS	frameshift_variant	Ex21	NC_000002.12:g.178781237_178781240del	NC_000002.12(NM_001267550.2):c.3404_3407del	NP_001254479.2:p.(Gln1135ProfsTer7)	LIKELY_PATHOGENIC	PVS1,PM2_supporting
2	178594134	C	T	2-178594134-C-T	TTN	NM_001267550.2	c.58259G>A_p.Trp19420Ter	1	SG	stop_gained	Ex297	NC_000002.12:g.178594134C>T	NC_000002.12(NM_001267550.2):c.58259G>A	NP_001254479.2:p.(Trp19420Ter)	LIKELY_PATHOGENIC	PVS1,PM2_supporting,PP5
2	178783025	TG	T	2-178783025-TG-T	TTN	NM_001267550.2	c.2880del_p.Thr961ProfsTer14	1	FS	frameshift_variant	Ex18	NC_000002.12:g.178783026del	NC_000002.12(NM_001267550.2):c.2880del	NP_001254479.2:p.(Thr961ProfsTer14)	LIKELY_PATHOGENIC	PVS1,PM2_supporting
2	178784216	GT	G	2-178784216-GT-G	TTN	NM_001267550.2	c.2628del_p.Leu878CysfsTer21	1	FS	frameshift_variant	Ex16	NC_000002.12:g.178784217del	NC_000002.12(NM_001267550.2):c.2628del	NP_001254479.2:p.(Leu878CysfsTer21)	LIKELY_PATHOGENIC	PVS1,PM2_supporting,PP5
2	178785848	CTG	C	2-178785848-CTG-C	TTN	NM_001267550.2	c.2368_2369del_p.Gln790AspfsTer17	1	FS	splice_region_variant|frameshift_variant	Ex14	NC_000002.12:g.178785849_178785850del	NC_000002.12(NM_001267550.2):c.2368_2369del	NP_001254479.2:p.(Gln790AspfsTer17)	LIKELY_PATHOGENIC	PVS1,PM2_supporting
2	178586647	G	GTACTC	2-178586647-G-GTACTC	TTN	NM_001267550.2	c.64249_64253dup_p.Tyr21418Ter	1	SG	frameshift_variant|stop_gained	Ex308	NC_000002.12:g.178586647_178586648insTACTC	NC_000002.12(NM_001267550.2):c.64249_64253dup	NP_001254479.2:p.(Tyr21418Ter)	LIKELY_PATHOGENIC	PVS1,PM2_supporting,PP5
2	178786050	A	AGATG	2-178786050-A-AGATG	TTN	NM_001267550.2	c.2164_2167dup_p.Leu723ProfsTer3	1	FS	frameshift_variant	Ex14	NC_000002.12:g.178786050_178786051insGATG	NC_000002.12(NM_001267550.2):c.2164_2167dup	NP_001254479.2:p.(Leu723ProfsTer3)	LIKELY_PATHOGENIC	PVS1,PM2_supporting
2	178789474	AG	A	2-178789474-AG-A	TTN	NM_001267550.2	c.1961del_p.Thr654MetfsTer6	1	FS	frameshift_variant	Ex13	NC_000002.12:g.178789475del	NC_000002.12(NM_001267550.2):c.1961del	NP_001254479.2:p.(Thr654MetfsTer6)	LIKELY_PATHOGENIC	PVS1,PM2_supporting,PP5
2	178615485	C	T	2-178615485-C-T	TTN	NM_001267550.2	c.48461-1G>A_p.?	1	ESS	splice_acceptor_variant	In258/259	NC_000002.12:g.178615485C>T	NC_000002.12(NM_001267550.2):c.48461-1G>A	NP_001254479.2:p.(?)	LIKELY_PATHOGENIC	PVS1,PM2_supporting,PP5
2	178559706	G	C	2-178559706-G-C	TTN	NM_001267550.2	c.86426C>G_p.Ser28809Ter	1	SG	stop_gained	Ex326	NC_000002.12:g.178559706G>C	NC_000002.12(NM_001267550.2):c.86426C>G	NP_001254479.2:p.(Ser28809Ter)	LIKELY_PATHOGENIC	PVS1,PM2_supporting,PP5
2	178792181	TCA	T	2-178792181-TCA-T	TTN	NM_001267550.2	c.1551_1552del_p.Glu518LysfsTer13	1	FS	frameshift_variant	Ex10	NC_000002.12:g.178792182_178792183del	NC_000002.12(NM_001267550.2):c.1551_1552del	NP_001254479.2:p.(Glu518LysfsTer13)	LIKELY_PATHOGENIC	PVS1,PM2_supporting,PP5
2	178591418	T	A	2-178591418-T-A	TTN	NM_001267550.2	c.60307A>T_p.Arg20103Ter	1	SG	stop_gained	Ex304	NC_000002.12:g.178591418T>A	NC_000002.12(NM_001267550.2):c.60307A>T	NP_001254479.2:p.(Arg20103Ter)	LIKELY_PATHOGENIC	PVS1,PM2_supporting,PP5
2	178569839	A	C	2-178569839-A-C	TTN	NM_001267550.2	c.76293T>G_p.Tyr25431Ter	1	SG	stop_gained	Ex326	NC_000002.12:g.178569839A>C	NC_000002.12(NM_001267550.2):c.76293T>G	NP_001254479.2:p.(Tyr25431Ter)	LIKELY_PATHOGENIC	PVS1,PM2_supporting,PP5
2	178739322	C	T	2-178739322-C-T	TTN	NM_001267550.2	c.13911G>A_p.Trp4637Ter	1	SG	stop_gained	Ex48	NC_000002.12:g.178739322C>T	NC_000002.12(NM_001267550.2):c.13911G>A	NP_001254479.2:p.(Trp4637Ter)	LIKELY_PATHOGENIC	PVS1,PM2_supporting,PP5
2	178793463	A	AT	2-178793463-A-AT	TTN	NM_001267550.2	c.1476dup_p.Ser493IlefsTer19	1	FS	frameshift_variant	Ex9	NC_000002.12:g.178793463_178793464insT	NC_000002.12(NM_001267550.2):c.1476dup	NP_001254479.2:p.(Ser493IlefsTer19)	LIKELY_PATHOGENIC	PVS1,PM2_supporting
2	178739285	A	ACTTTT	2-178739285-A-ACTTTT	TTN	NM_001267550.2	c.13943_13947dup_p.Phe4650LysfsTer14	1	FS	frameshift_variant	Ex48	NC_000002.12:g.178739285_178739286insCTTTT	NC_000002.12(NM_001267550.2):c.13943_13947dup	NP_001254479.2:p.(Phe4650LysfsTer14)	LIKELY_PATHOGENIC	PVS1,PM2_supporting,PP5,PS4_NA(BP->PP)
2	178739309	TA	T	2-178739309-TA-T	TTN	NM_001267550.2	c.13923del_p.Asn4641LysfsTer21	1	FS	frameshift_variant	Ex48	NC_000002.12:g.178739310del	NC_000002.12(NM_001267550.2):c.13923del	NP_001254479.2:p.(Asn4641LysfsTer21)	LIKELY_PATHOGENIC	PVS1,PM2_supporting
2	178589508	A	T	2-178589508-A-T	TTN	NM_001267550.2	c.62217T>A_p.Tyr20739Ter	1	SG	stop_gained	Ex304	NC_000002.12:g.178589508A>T	NC_000002.12(NM_001267550.2):c.62217T>A	NP_001254479.2:p.(Tyr20739Ter)	LIKELY_PATHOGENIC	PVS1,PM2_supporting,PP5
2	178739472	CT	C	2-178739472-CT-C	TTN	NM_001267550.2	c.13760del_p.Glu4587GlyfsTer5	1	FS	frameshift_variant	Ex48	NC_000002.12:g.178739473del	NC_000002.12(NM_001267550.2):c.13760del	NP_001254479.2:p.(Glu4587GlyfsTer5)	LIKELY_PATHOGENIC	PVS1,PM2_supporting,PP5
2	178535239	A	C	2-178535239-A-C	TTN	NM_001267550.2	c.101376T>G_p.Tyr33792Ter	1	SG	stop_gained	Ex358	NC_000002.12:g.178535239A>C	NC_000002.12(NM_001267550.2):c.101376T>G	NP_001254479.2:p.(Tyr33792Ter)	LIKELY_PATHOGENIC	PVS1,PM2_supporting,PP5
2	178739562	AG	A	2-178739562-AG-A	TTN	NM_001267550.2	c.13670del_p.Ala4557ValfsTer14	1	FS	frameshift_variant	Ex48	NC_000002.12:g.178739563del	NC_000002.12(NM_001267550.2):c.13670del	NP_001254479.2:p.(Ala4557ValfsTer14)	LIKELY_PATHOGENIC	PVS1,PM2_supporting
2	178738255	C	T	2-178738255-C-T	TTN	NM_001267550.2	c.14198G>A_p.Trp4733Ter	1	SG	stop_gained	Ex49	NC_000002.12:g.178738255C>T	NC_000002.12(NM_001267550.2):c.14198G>A	NP_001254479.2:p.(Trp4733Ter)	LIKELY_PATHOGENIC	PVS1,PM2_supporting,PP5
2	178568806	C	A	2-178568806-C-A	TTN	NM_001267550.2	c.77326G>T_p.Glu25776Ter	1	SG	stop_gained	Ex326	NC_000002.12:g.178568806C>A	NC_000002.12(NM_001267550.2):c.77326G>T	NP_001254479.2:p.(Glu25776Ter)	LIKELY_PATHOGENIC	PVS1,PM2_supporting,PP5
2	178739787	A	T	2-178739787-A-T	TTN	NM_001267550.2	c.13446T>A_p.Tyr4482Ter	1	SG	stop_gained	Ex48	NC_000002.12:g.178739787A>T	NC_000002.12(NM_001267550.2):c.13446T>A	NP_001254479.2:p.(Tyr4482Ter)	LIKELY_PATHOGENIC	PVS1,PM2_supporting,PP5
2	178739914	A	AGGTACCCTTCCCTGTACCTCCTGCACTTTCTTTAT	2-178739914-A-AGGTACCCTTCCCTGTACCTCCTGCACTTTCTTTAT	TTN	NM_001267550.2	c.13318_13319insATAAAGAAAGTGCAGGAGGTACAGGGAAGGGTACC_p.Met4440AsnfsTer24	1	FS	frameshift_variant	Ex48	NC_000002.12:g.178739914_178739915insGGTACCCTTCCCTGTACCTCCTGCACTTTCTTTAT	NC_000002.12(NM_001267550.2):c.13318_13319insATAAAGAAAGTGCAGGAGGTACAGGGAAGGGTACC	NP_001254479.2:p.(Met4440AsnfsTer24)	LIKELY_PATHOGENIC	PVS1,PM2_supporting
2	178740088	C	CT	2-178740088-C-CT	TTN	NM_001267550.2	c.13144dup_p.Ser4382LysfsTer36	1	FS	frameshift_variant	Ex48	NC_000002.12:g.178740088_178740089insT	NC_000002.12(NM_001267550.2):c.13144dup	NP_001254479.2:p.(Ser4382LysfsTer36)	LIKELY_PATHOGENIC	PVS1,PM2_supporting,PP5
2	178550965	A	G	2-178550965-A-G	TTN	NM_001267550.2	c.91564+2T>C_p.?	1	ESS	splice_donor_variant	In336/337	NC_000002.12:g.178550965A>G	NC_000002.12(NM_001267550.2):c.91564+2T>C	NP_001254479.2:p.(?)	LIKELY_PATHOGENIC	PVS1,PM2_supporting,PP5
2	178563028	G	A	2-178563028-G-A	TTN	NM_001267550.2	c.83104C>T_p.Arg27702Ter	1	SG	stop_gained	Ex326	NC_000002.12:g.178563028G>A	NC_000002.12(NM_001267550.2):c.83104C>T	NP_001254479.2:p.(Arg27702Ter)	LIKELY_PATHOGENIC	PVS1,PM2_supporting,PP5
2	178740303	TG	T	2-178740303-TG-T	TTN	NM_001267550.2	c.12929del_p.Pro4310HisfsTer19	1	FS	frameshift_variant	Ex48	NC_000002.12:g.178740304del	NC_000002.12(NM_001267550.2):c.12929del	NP_001254479.2:p.(Pro4310HisfsTer19)	LIKELY_PATHOGENIC	PVS1,PM2_supporting
2	178591681	A	T	2-178591681-A-T	TTN	NM_001267550.2	c.60138T>A_p.Tyr20046Ter	1	SG	stop_gained	Ex303	NC_000002.12:g.178591681A>T	NC_000002.12(NM_001267550.2):c.60138T>A	NP_001254479.2:p.(Tyr20046Ter)	LIKELY_PATHOGENIC	PVS1,PM2_supporting,PP5
2	178740335	C	CT	2-178740335-C-CT	TTN	NM_001267550.2	c.12897dup_p.Gly4300ArgfsTer3	1	FS	frameshift_variant	Ex48	NC_000002.12:g.178740335_178740336insT	NC_000002.12(NM_001267550.2):c.12897dup	NP_001254479.2:p.(Gly4300ArgfsTer3)	PATHOGENIC	PVS1,PM2_supporting,PP5,PS4_supporting
2	178559456	C	T	2-178559456-C-T	TTN	NM_001267550.2	c.86676G>A_p.Trp28892Ter	1	SG	stop_gained	Ex326	NC_000002.12:g.178559456C>T	NC_000002.12(NM_001267550.2):c.86676G>A	NP_001254479.2:p.(Trp28892Ter)	LIKELY_PATHOGENIC	PVS1,PM2_supporting,PP5
2	178534662	C	A	2-178534662-C-A	TTN	NM_001267550.2	c.101953G>T_p.Glu33985Ter	1	SG	stop_gained	Ex358	NC_000002.12:g.178534662C>A	NC_000002.12(NM_001267550.2):c.101953G>T	NP_001254479.2:p.(Glu33985Ter)	LIKELY_PATHOGENIC	PVS1,PM2_supporting,PP5
2	178547073	A	C	2-178547073-A-C	TTN	NM_001267550.2	c.94452T>G_p.Tyr31484Ter	1	SG	stop_gained	Ex340	NC_000002.12:g.178547073A>C	NC_000002.12(NM_001267550.2):c.94452T>G	NP_001254479.2:p.(Tyr31484Ter)	LIKELY_PATHOGENIC	PVS1,PM2_supporting,PP5
2	178740362	C	CT	2-178740362-C-CT	TTN	NM_001267550.2	c.12870dup_p.Val4291SerfsTer12	1	FS	frameshift_variant	Ex48	NC_000002.12:g.178740362_178740363insT	NC_000002.12(NM_001267550.2):c.12870dup	NP_001254479.2:p.(Val4291SerfsTer12)	LIKELY_PATHOGENIC	PVS1,PM2_supporting,PP5
2	178741115	A	AG	2-178741115-A-AG	TTN	NM_001267550.2	c.12117dup_p.Cys4040LeufsTer11	1	FS	frameshift_variant	Ex48	NC_000002.12:g.178741115_178741116insG	NC_000002.12(NM_001267550.2):c.12117dup	NP_001254479.2:p.(Cys4040LeufsTer11)	LIKELY_PATHOGENIC	PVS1,PM2_supporting
2	178598042	AC	A	2-178598042-AC-A	TTN	NM_001267550.2	c.57127del_p.Val19043Ter	1	SG	frameshift_variant|stop_gained	Ex293	NC_000002.12:g.178598043del	NC_000002.12(NM_001267550.2):c.57127del	NP_001254479.2:p.(Val19043Ter)	LIKELY_PATHOGENIC	PVS1,PM2_supporting,PP5
2	178782604	T	A	2-178782604-T-A	TTN	NM_001267550.2	c.3101-2A>T_p.?	1	ESS	splice_acceptor_variant	In18/19	NC_000002.12:g.178782604T>A	NC_000002.12(NM_001267550.2):c.3101-2A>T	NP_001254479.2:p.(?)	LIKELY_PATHOGENIC	PVS1,PM2_supporting,PP5
2	178586657	C	T	2-178586657-C-T	TTN	NM_001267550.2	c.64244G>A_p.Trp21415Ter	1	SG	stop_gained	Ex308	NC_000002.12:g.178586657C>T	NC_000002.12(NM_001267550.2):c.64244G>A	NP_001254479.2:p.(Trp21415Ter)	LIKELY_PATHOGENIC	PVS1,PM2_supporting,PP5
2	178605263	G	A	2-178605263-G-A	TTN	NM_001267550.2	c.53914C>T_p.Arg17972Ter	1	SG	stop_gained	Ex280	NC_000002.12:g.178605263G>A	NC_000002.12(NM_001267550.2):c.53914C>T	NP_001254479.2:p.(Arg17972Ter)	LIKELY_PATHOGENIC	PVS1,PM2_supporting,PP5
2	178741213	C	CCACT	2-178741213-C-CCACT	TTN	NM_001267550.2	c.12016_12019dup_p.Gly4007GlufsTer7	1	FS	frameshift_variant	Ex48	NC_000002.12:g.178741213_178741214insCACT	NC_000002.12(NM_001267550.2):c.12016_12019dup	NP_001254479.2:p.(Gly4007GlufsTer7)	PATHOGENIC	PVS1,PM2_supporting,PS4_supporting
2	178741717	AGTGTAGCCACATCCCCCAT	A	2-178741717-AGTGTAGCCACATCCCCCAT-A	TTN	NM_001267550.2	c.11497_11515del_p.Met3833CysfsTer3	1	FS	frameshift_variant	Ex48	NC_000002.12:g.178741718_178741736del	NC_000002.12(NM_001267550.2):c.11497_11515del	NP_001254479.2:p.(Met3833CysfsTer3)	PATHOGENIC	PVS1,PM2_supporting,PP5,PS4_supporting
2	178741829	AC	A	2-178741829-AC-A	TTN	NM_001267550.2	c.11403del_p.Leu3801PhefsTer31	1	FS	frameshift_variant	Ex48	NC_000002.12:g.178741830del	NC_000002.12(NM_001267550.2):c.11403del	NP_001254479.2:p.(Leu3801PhefsTer31)	LIKELY_PATHOGENIC	PVS1,PM2_supporting
2	178780185	T	A	2-178780185-T-A	TTN	NM_001267550.2	c.3544A>T_p.Lys1182Ter	1	SG	stop_gained	Ex22	NC_000002.12:g.178780185T>A	NC_000002.12(NM_001267550.2):c.3544A>T	NP_001254479.2:p.(Lys1182Ter)	LIKELY_PATHOGENIC	PVS1,PM2_supporting,PP5
2	178527613	C	CTGCTGCTGAAACTGCTGAA	2-178527613-C-CTGCTGCTGAAACTGCTGAA	TTN	NM_001267550.2	c.107494_107512dup_p.Ser35838IlefsTer10	1	FS	frameshift_variant	Ex362	NC_000002.12:g.178527613_178527614insTGCTGCTGAAACTGCTGAA	NC_000002.12(NM_001267550.2):c.107494_107512dup	NP_001254479.2:p.(Ser35838IlefsTer10)	LIKELY_PATHOGENIC	PVS1,PM2_supporting
2	178532036	G	C	2-178532036-G-C	TTN	NM_001267550.2	c.104579C>G_p.Ser34860Ter	1	SG	stop_gained	Ex358	NC_000002.12:g.178532036G>C	NC_000002.12(NM_001267550.2):c.104579C>G	NP_001254479.2:p.(Ser34860Ter)	LIKELY_PATHOGENIC	PVS1,PM2_supporting,PP5
2	178527722	CCT	C	2-178527722-CCT-C	TTN	NM_001267550.2	c.107402_107403del_p.Glu35801GlyfsTer8	1	FS	frameshift_variant	Ex362	NC_000002.12:g.178527723_178527724del	NC_000002.12(NM_001267550.2):c.107402_107403del	NP_001254479.2:p.(Glu35801GlyfsTer8)	LIKELY_PATHOGENIC	PVS1,PM2_supporting
2	178635203	G	A	2-178635203-G-A	TTN	NM_001267550.2	c.41986C>T_p.Gln13996Ter	1	SG	stop_gained	Ex228	NC_000002.12:g.178635203G>A	NC_000002.12(NM_001267550.2):c.41986C>T	NP_001254479.2:p.(Gln13996Ter)	LIKELY_PATHOGENIC	PVS1,PM2_supporting,PP5
2	178528682	TACTG	T	2-178528682-TACTG-T	TTN	NM_001267550.2	c.107065_107068del_p.Gln35689MetfsTer3	1	FS	frameshift_variant	Ex360	NC_000002.12:g.178528683_178528686del	NC_000002.12(NM_001267550.2):c.107065_107068del	NP_001254479.2:p.(Gln35689MetfsTer3)	LIKELY_PATHOGENIC	PVS1,PM2_supporting,PP5
2	178528818	GCTCTA	G	2-178528818-GCTCTA-G	TTN	NM_001267550.2	c.106928_106932del_p.Val35643AlafsTer5	1	FS	frameshift_variant	Ex360	NC_000002.12:g.178528819_178528823del	NC_000002.12(NM_001267550.2):c.106928_106932del	NP_001254479.2:p.(Val35643AlafsTer5)	LIKELY_PATHOGENIC	PVS1,PM2_supporting,PP5
2	178529121	CT	C	2-178529121-CT-C	TTN	NM_001267550.2	c.106629del_p.Ala35544ProfsTer2	1	FS	frameshift_variant	Ex360	NC_000002.12:g.178529122del	NC_000002.12(NM_001267550.2):c.106629del	NP_001254479.2:p.(Ala35544ProfsTer2)	LIKELY_PATHOGENIC	PVS1,PM2_supporting,PP5,PS4_NA(BP->PP)
2	178530310	ACTGT	A	2-178530310-ACTGT-A	TTN	NM_001267550.2	c.106301_106304del_p.Asp35434ValfsTer43	1	FS	frameshift_variant	Ex358	NC_000002.12:g.178530311_178530314del	NC_000002.12(NM_001267550.2):c.106301_106304del	NP_001254479.2:p.(Asp35434ValfsTer43)	LIKELY_PATHOGENIC	PVS1,PM2_supporting
2	178766613	C	G	2-178766613-C-G	TTN	NM_001267550.2	c.9472-1G>C_p.?	1	ESS	splice_acceptor_variant	In40/41	NC_000002.12:g.178766613C>G	NC_000002.12(NM_001267550.2):c.9472-1G>C	NP_001254479.2:p.(?)	LIKELY_PATHOGENIC	PVS1,PM2_supporting,PP5
2	178530457	T	TA	2-178530457-T-TA	TTN	NM_001267550.2	c.106157dup_p.Ser35387IlefsTer7	1	FS	frameshift_variant	Ex358	NC_000002.12:g.178530457_178530458insA	NC_000002.12(NM_001267550.2):c.106157dup	NP_001254479.2:p.(Ser35387IlefsTer7)	LIKELY_PATHOGENIC	PVS1,PM2_supporting,PP5
2	178530499	T	TAA	2-178530499-T-TAA	TTN	NM_001267550.2	c.106114_106115dup_p.Leu35372PhefsTer34	1	FS	frameshift_variant	Ex358	NC_000002.12:g.178530499_178530500insAA	NC_000002.12(NM_001267550.2):c.106114_106115dup	NP_001254479.2:p.(Leu35372PhefsTer34)	PATHOGENIC	PVS1,PM2_supporting,PP5,PS4_supporting
2	178598879	A	T	2-178598879-A-T	TTN	NM_001267550.2	c.56831T>A_p.Leu18944Ter	1	SG	stop_gained	Ex291	NC_000002.12:g.178598879A>T	NC_000002.12(NM_001267550.2):c.56831T>A	NP_001254479.2:p.(Leu18944Ter)	LIKELY_PATHOGENIC	PVS1,PM2_supporting,PP5
2	178530565	AG	A	2-178530565-AG-A	TTN	NM_001267550.2	c.106049del_p.Thr35350MetfsTer55	1	FS	frameshift_variant	Ex358	NC_000002.12:g.178530566del	NC_000002.12(NM_001267550.2):c.106049del	NP_001254479.2:p.(Thr35350MetfsTer55)	LIKELY_PATHOGENIC	PVS1,PM2_supporting,PP5
2	178616995	A	T	2-178616995-A-T	TTN	NM_001267550.2	c.47894T>A_p.Leu15965Ter	1	SG	stop_gained	Ex256	NC_000002.12:g.178616995A>T	NC_000002.12(NM_001267550.2):c.47894T>A	NP_001254479.2:p.(Leu15965Ter)	LIKELY_PATHOGENIC	PVS1,PM2_supporting,PP5
2	178530599	TC	T	2-178530599-TC-T	TTN	NM_001267550.2	c.106015del_p.Asp35339MetfsTer66	1	FS	frameshift_variant	Ex358	NC_000002.12:g.178530600del	NC_000002.12(NM_001267550.2):c.106015del	NP_001254479.2:p.(Asp35339MetfsTer66)	PATHOGENIC	PVS1,PM2_supporting,PS4_supporting
2	178530804	G	GT	2-178530804-G-GT	TTN	NM_001267550.2	c.105810dup_p.Pro35271ThrfsTer28	1	FS	frameshift_variant	Ex358	NC_000002.12:g.178530804_178530805insT	NC_000002.12(NM_001267550.2):c.105810dup	NP_001254479.2:p.(Pro35271ThrfsTer28)	LIKELY_PATHOGENIC	PVS1,PM2_supporting,PP5
2	178586583	T	A	2-178586583-T-A	TTN	NM_001267550.2	c.64318A>T_p.Arg21440Ter	1	SG	stop_gained	Ex308	NC_000002.12:g.178586583T>A	NC_000002.12(NM_001267550.2):c.64318A>T	NP_001254479.2:p.(Arg21440Ter)	LIKELY_PATHOGENIC	PVS1,PM2_supporting,PP5
2	178535851	T	A	2-178535851-T-A	TTN	NM_001267550.2	c.100766-2A>T_p.?	1	ESS	splice_acceptor_variant	In357/358	NC_000002.12:g.178535851T>A	NC_000002.12(NM_001267550.2):c.100766-2A>T	NP_001254479.2:p.(?)	LIKELY_PATHOGENIC	PVS1,PM2_supporting,PP5
2	178530809	GT	G	2-178530809-GT-G	TTN	NM_001267550.2	c.105805del_p.Thr35269GlnfsTer24	1	FS	frameshift_variant	Ex358	NC_000002.12:g.178530810del	NC_000002.12(NM_001267550.2):c.105805del	NP_001254479.2:p.(Thr35269GlnfsTer24)	LIKELY_PATHOGENIC	PVS1,PM2_supporting,PS4_NA(BP->PP)
2	178530823	T	TA	2-178530823-T-TA	TTN	NM_001267550.2	c.105791dup_p.Ser35265IlefsTer34	1	FS	frameshift_variant	Ex358	NC_000002.12:g.178530823_178530824insA	NC_000002.12(NM_001267550.2):c.105791dup	NP_001254479.2:p.(Ser35265IlefsTer34)	LIKELY_PATHOGENIC	PVS1,PM2_supporting,PP5,PS4_NA(BP->PP)
2	178530871	CTT	C	2-178530871-CTT-C	TTN	NM_001267550.2	c.105742_105743del_p.Lys35248ValfsTer50	1	FS	frameshift_variant	Ex358	NC_000002.12:g.178530872_178530873del	NC_000002.12(NM_001267550.2):c.105742_105743del	NP_001254479.2:p.(Lys35248ValfsTer50)	LIKELY_PATHOGENIC	PVS1,PM2_supporting
2	178528428	C	G	2-178528428-C-G	TTN	NM_001267550.2	c.107224-1G>C_p.?	1	ESS	splice_acceptor_variant	In360/361	NC_000002.12:g.178528428C>G	NC_000002.12(NM_001267550.2):c.107224-1G>C	NP_001254479.2:p.(?)	LIKELY_PATHOGENIC	PVS1,PM2_supporting,PP5
2	178588802	CT	C	2-178588802-CT-C	TTN	NM_001267550.2	c.62922del_p.Val20975Ter	1	SG	frameshift_variant|stop_gained	Ex304	NC_000002.12:g.178588803del	NC_000002.12(NM_001267550.2):c.62922del	NP_001254479.2:p.(Val20975Ter)	LIKELY_PATHOGENIC	PVS1,PM2_supporting,PP5
2	178547306	C	T	2-178547306-C-T	TTN	NM_001267550.2	c.94220-1G>A_p.?	1	ESS	splice_acceptor_variant	In339/340	NC_000002.12:g.178547306C>T	NC_000002.12(NM_001267550.2):c.94220-1G>A	NP_001254479.2:p.(?)	LIKELY_PATHOGENIC	PVS1,PM2_supporting,PP5
2	178531008	CCA	C	2-178531008-CCA-C	TTN	NM_001267550.2	c.105605_105606del_p.Val35202GlyfsTer5	1	FS	frameshift_variant	Ex358	NC_000002.12:g.178531009_178531010del	NC_000002.12(NM_001267550.2):c.105605_105606del	NP_001254479.2:p.(Val35202GlyfsTer5)	LIKELY_PATHOGENIC	PVS1,PM2_supporting,PP5
2	178531423	AAC	A	2-178531423-AAC-A	TTN	NM_001267550.2	c.105190_105191del_p.Val35064PhefsTer4	1	FS	frameshift_variant	Ex358	NC_000002.12:g.178531424_178531425del	NC_000002.12(NM_001267550.2):c.105190_105191del	NP_001254479.2:p.(Val35064PhefsTer4)	LIKELY_PATHOGENIC	PVS1,PM2_supporting,PP5,BS2_supporting
2	178621668	A	T	2-178621668-A-T	TTN	NM_001267550.2	c.45156T>A_p.Cys15052Ter	1	SG	stop_gained	Ex245	NC_000002.12:g.178621668A>T	NC_000002.12(NM_001267550.2):c.45156T>A	NP_001254479.2:p.(Cys15052Ter)	LIKELY_PATHOGENIC	PVS1,PM2_supporting,PP5
2	178531453	AG	A	2-178531453-AG-A	TTN	NM_001267550.2	c.105161del_p.Pro35054LeufsTer3	1	FS	frameshift_variant	Ex358	NC_000002.12:g.178531454del	NC_000002.12(NM_001267550.2):c.105161del	NP_001254479.2:p.(Pro35054LeufsTer3)	PATHOGENIC	PVS1,PM2_supporting,PP5,PS4_supporting
2	178578078	C	A	2-178578078-C-A	TTN	NM_001267550.2	c.68437G>T_p.Glu22813Ter	1	SG	stop_gained	Ex322	NC_000002.12:g.178578078C>A	NC_000002.12(NM_001267550.2):c.68437G>T	NP_001254479.2:p.(Glu22813Ter)	LIKELY_PATHOGENIC	PVS1,PM2_supporting,PP5
2	178535688	G	A	2-178535688-G-A	TTN	NM_001267550.2	c.100927C>T_p.Gln33643Ter	1	SG	stop_gained	Ex358	NC_000002.12:g.178535688G>A	NC_000002.12(NM_001267550.2):c.100927C>T	NP_001254479.2:p.(Gln33643Ter)	LIKELY_PATHOGENIC	PVS1,PM2_supporting,PP5
2	178531661	CT	C	2-178531661-CT-C	TTN	NM_001267550.2	c.104953del_p.Ser34985AlafsTer47	1	FS	frameshift_variant	Ex358	NC_000002.12:g.178531662del	NC_000002.12(NM_001267550.2):c.104953del	NP_001254479.2:p.(Ser34985AlafsTer47)	LIKELY_PATHOGENIC	PVS1,PM2_supporting,PP5
2	178531887	TG	T	2-178531887-TG-T	TTN	NM_001267550.2	c.104727del_p.Arg34910GlyfsTer5	1	FS	frameshift_variant	Ex358	NC_000002.12:g.178531888del	NC_000002.12(NM_001267550.2):c.104727del	NP_001254479.2:p.(Arg34910GlyfsTer5)	LIKELY_PATHOGENIC	PVS1,PM2_supporting,PS4_NA(BP->PP)
2	178531890	AAAAGATATCAAATCTTGCAGACCTCT	A	2-178531890-AAAAGATATCAAATCTTGCAGACCTCT-A	TTN	NM_001267550.2	c.104699_104724del_p.Glu34900ValfsTer4	1	FS	frameshift_variant	Ex358	NC_000002.12:g.178531891_178531916del	NC_000002.12(NM_001267550.2):c.104699_104724del	NP_001254479.2:p.(Glu34900ValfsTer4)	LIKELY_PATHOGENIC	PVS1,PM2_supporting,PS4_NA(BP->PP)
2	178781187	C	A	2-178781187-C-A	TTN	NM_001267550.2	c.3457G>T_p.Glu1153Ter	1	SG	stop_gained	Ex21	NC_000002.12:g.178781187C>A	NC_000002.12(NM_001267550.2):c.3457G>T	NP_001254479.2:p.(Glu1153Ter)	LIKELY_PATHOGENIC	PVS1,PM2_supporting,PP5
2	178794398	C	T	2-178794398-C-T	TTN	NM_001267550.2	c.1398+1G>A_p.?	1	ESS	splice_donor_variant	In8/9	NC_000002.12:g.178794398C>T	NC_000002.12(NM_001267550.2):c.1398+1G>A	NP_001254479.2:p.(?)	LIKELY_PATHOGENIC	PVS1,PM2_supporting,PP5
2	178594244	T	C	2-178594244-T-C	TTN	NM_001267550.2	c.58151-2A>G_p.?	1	ESS	splice_acceptor_variant	In296/297	NC_000002.12:g.178594244T>C	NC_000002.12(NM_001267550.2):c.58151-2A>G	NP_001254479.2:p.(?)	LIKELY_PATHOGENIC	PVS1,PM2_supporting,PP5
2	178532127	A	AAT	2-178532127-A-AAT	TTN	NM_001267550.2	c.104487_104488insAT_p.Ser34830IlefsTer9	1	FS	frameshift_variant	Ex358	NC_000002.12:g.178532127_178532128insAT	NC_000002.12(NM_001267550.2):c.104487_104488insAT	NP_001254479.2:p.(Ser34830IlefsTer9)	LIKELY_PATHOGENIC	PVS1,PM2_supporting
2	178602001	C	T	2-178602001-C-T	TTN	NM_001267550.2	c.55269+1G>A_p.?	1	ESS	splice_donor_variant	In284/285	NC_000002.12:g.178602001C>T	NC_000002.12(NM_001267550.2):c.55269+1G>A	NP_001254479.2:p.(?)	LIKELY_PATHOGENIC	PVS1,PM2_supporting,PP5
2	178532357	G	GC	2-178532357-G-GC	TTN	NM_001267550.2	c.104257dup_p.Ala34753GlyfsTer15	1	FS	frameshift_variant	Ex358	NC_000002.12:g.178532357_178532358insC	NC_000002.12(NM_001267550.2):c.104257dup	NP_001254479.2:p.(Ala34753GlyfsTer15)	LIKELY_PATHOGENIC	PVS1,PM2_supporting
2	178536971	C	CTA	2-178536971-C-CTA	TTN	NM_001267550.2	c.100137_100138insTA_p.Val33380Ter	1	SG	frameshift_variant|stop_gained	Ex356	NC_000002.12:g.178536971_178536972insTA	NC_000002.12(NM_001267550.2):c.100137_100138insTA	NP_001254479.2:p.(Val33380Ter)	LIKELY_PATHOGENIC	PVS1,PM2_supporting,PP5
2	178532545	AC	A	2-178532545-AC-A	TTN	NM_001267550.2	c.104069del_p.Gly34690ValfsTer57	1	FS	frameshift_variant	Ex358	NC_000002.12:g.178532546del	NC_000002.12(NM_001267550.2):c.104069del	NP_001254479.2:p.(Gly34690ValfsTer57)	LIKELY_PATHOGENIC	PVS1,PM2_supporting,PP5,PS4_NA(BP->PP)
2	178585348	C	T	2-178585348-C-T	TTN	NM_001267550.2	c.64397-1G>A_p.?	1	ESS	splice_acceptor_variant	In308/309	NC_000002.12:g.178585348C>T	NC_000002.12(NM_001267550.2):c.64397-1G>A	NP_001254479.2:p.(?)	LIKELY_PATHOGENIC	PVS1,PM2_supporting,PP5
2	178552140	C	A	2-178552140-C-A	TTN	NM_001267550.2	c.90760G>T_p.Gly30254Ter	1	SG	stop_gained	Ex335	NC_000002.12:g.178552140C>A	NC_000002.12(NM_001267550.2):c.90760G>T	NP_001254479.2:p.(Gly30254Ter)	LIKELY_PATHOGENIC	PVS1,PM2_supporting,PP5
2	178532583	CCT	C	2-178532583-CCT-C	TTN	NM_001267550.2	c.104030_104031del_p.Glu34677GlyfsTer7	1	FS	frameshift_variant	Ex358	NC_000002.12:g.178532584_178532585del	NC_000002.12(NM_001267550.2):c.104030_104031del	NP_001254479.2:p.(Glu34677GlyfsTer7)	LIKELY_PATHOGENIC	PVS1,PM2_supporting,PP5
2	178775197	G	A	2-178775197-G-A	TTN	NM_001267550.2	c.6514C>T_p.Gln2172Ter	1	SG	stop_gained	Ex29	NC_000002.12:g.178775197G>A	NC_000002.12(NM_001267550.2):c.6514C>T	NP_001254479.2:p.(Gln2172Ter)	LIKELY_PATHOGENIC	PVS1,PM2_supporting,PP5
2	178579559	A	G	2-178579559-A-G	TTN	NM_001267550.2	c.67636+2T>C_p.?	1	ESS	splice_donor_variant	In319/320	NC_000002.12:g.178579559A>G	NC_000002.12(NM_001267550.2):c.67636+2T>C	NP_001254479.2:p.(?)	LIKELY_PATHOGENIC	PVS1,PM2_supporting,PP5
2	178591842	C	A	2-178591842-C-A	TTN	NM_001267550.2	c.59977G>T_p.Glu19993Ter	1	SG	stop_gained	Ex303	NC_000002.12:g.178591842C>A	NC_000002.12(NM_001267550.2):c.59977G>T	NP_001254479.2:p.(Glu19993Ter)	LIKELY_PATHOGENIC	PVS1,PM2_supporting,PP5
2	178598496	GTTTTCCTACC	G	2-178598496-GTTTTCCTACC-G	TTN	NM_001267550.2	c.57111_57111+9del_p.?	1	ESS	splice_acceptor_variant	Ex292-In292/293	NC_000002.12:g.178598497_178598506del	NC_000002.12(NM_001267550.2):c.57111_57111+9del	NP_001254479.2:p.(?)	LIKELY_PATHOGENIC	PVS1,PM2_supporting,PP5
2	178532669	C	CCCCAA	2-178532669-C-CCCCAA	TTN	NM_001267550.2	c.103945_103946insTTGGG_p.Arg34649LeufsTer25	1	FS	frameshift_variant	Ex358	NC_000002.12:g.178532669_178532670insCCCAA	NC_000002.12(NM_001267550.2):c.103945_103946insTTGGG	NP_001254479.2:p.(Arg34649LeufsTer25)	PATHOGENIC	PVS1,PM2_supporting,PS4_supporting
2	178565275	T	TTA	2-178565275-T-TTA	TTN	NM_001267550.2	c.80855_80856dup_p.Thr26953Ter	1	SG	frameshift_variant|stop_gained	Ex326	NC_000002.12:g.178565275_178565276insTA	NC_000002.12(NM_001267550.2):c.80855_80856dup	NP_001254479.2:p.(Thr26953Ter)	LIKELY_PATHOGENIC	PVS1,PM2_supporting,PP5
2	178753123	C	T	2-178753123-C-T	TTN	NM_001267550.2	c.11311+1G>A_p.?	1	ESS	splice_donor_variant	In47/48	NC_000002.12:g.178753123C>T	NC_000002.12(NM_001267550.2):c.11311+1G>A	NP_001254479.2:p.(?)	LIKELY_PATHOGENIC	PVS1,PM2_supporting,PP5
2	178532670	GGT	G	2-178532670-GGT-G	TTN	NM_001267550.2	c.103943_103944del_p.Tyr34648SerfsTer3	1	FS	frameshift_variant	Ex358	NC_000002.12:g.178532671_178532672del	NC_000002.12(NM_001267550.2):c.103943_103944del	NP_001254479.2:p.(Tyr34648SerfsTer3)	LIKELY_PATHOGENIC	PVS1,PM2_supporting,PS4_NA(BP->PP)
2	178528273	C	G	2-178528273-C-G	TTN	NM_001267550.2	c.107377+1G>C_p.?	1	ESS	splice_donor_variant	In361/362	NC_000002.12:g.178528273C>G	NC_000002.12(NM_001267550.2):c.107377+1G>C	NP_001254479.2:p.(?)	PATHOGENIC	PVS1,PM2_supporting,PP5,PS3_supporting(PP->PM),PS4_supporting
2	178593338	G	A	2-178593338-G-A	TTN	NM_001267550.2	c.58870C>T_p.Arg19624Ter	1	SG	stop_gained	Ex299	NC_000002.12:g.178593338G>A	NC_000002.12(NM_001267550.2):c.58870C>T	NP_001254479.2:p.(Arg19624Ter)	PATHOGENIC	PVS1,PM2_supporting,PP5,PS4
2	178612355	G	A	2-178612355-G-A	TTN	NM_001267550.2	c.50170C>T_p.Arg16724Ter	1	SG	stop_gained	Ex266	NC_000002.12:g.178612355G>A	NC_000002.12(NM_001267550.2):c.50170C>T	NP_001254479.2:p.(Arg16724Ter)	PATHOGENIC	PVS1,PM2_supporting,PP5,PS4
2	178629441	G	A	2-178629441-G-A	TTN	NM_001267550.2	c.44284C>T_p.Arg14762Ter	1	SG	splice_region_variant|stop_gained	Ex240	NC_000002.12:g.178629441G>A	NC_000002.12(NM_001267550.2):c.44284C>T	NP_001254479.2:p.(Arg14762Ter)	PATHOGENIC	PVS1,PM2_supporting,PP5,PS4
2	178562716	G	A	2-178562716-G-A	TTN	NM_001267550.2	c.83416C>T_p.Arg27806Ter	1	SG	stop_gained	Ex326	NC_000002.12:g.178562716G>A	NC_000002.12(NM_001267550.2):c.83416C>T	NP_001254479.2:p.(Arg27806Ter)	PATHOGENIC	PVS1,PM2_supporting,PP5,PS4
2	178577010	C	A	2-178577010-C-A	TTN	NM_001267550.2	c.69325G>T_p.Glu23109Ter	1	SG	stop_gained	Ex324	NC_000002.12:g.178577010C>A	NC_000002.12(NM_001267550.2):c.69325G>T	NP_001254479.2:p.(Glu23109Ter)	LIKELY_PATHOGENIC	PVS1,PM2_supporting,PP5,PS4_NA(BP->PP)
2	178582209	C	G	2-178582209-C-G	TTN	NM_001267550.2	c.66161-1G>C_p.?	1	ESS	splice_acceptor_variant	In314/315	NC_000002.12:g.178582209C>G	NC_000002.12(NM_001267550.2):c.66161-1G>C	NP_001254479.2:p.(?)	LIKELY_PATHOGENIC	PVS1,PM2_supporting,PP5,PS4_NA(BP->PP)
2	178562161	G	A	2-178562161-G-A	TTN	NM_001267550.2	c.83971C>T_p.Gln27991Ter	1	SG	stop_gained	Ex326	NC_000002.12:g.178562161G>A	NC_000002.12(NM_001267550.2):c.83971C>T	NP_001254479.2:p.(Gln27991Ter)	LIKELY_PATHOGENIC	PVS1,PM2_supporting,PP5,PS4_NA(BP->PP)
2	178568057	G	T	2-178568057-G-T	TTN	NM_001267550.2	c.78075C>A_p.Tyr26025Ter	1	SG	stop_gained	Ex326	NC_000002.12:g.178568057G>T	NC_000002.12(NM_001267550.2):c.78075C>A	NP_001254479.2:p.(Tyr26025Ter)	LIKELY_PATHOGENIC	PVS1,PM2_supporting,PP5,PS4_NA(BP->PP)
2	178532910	T	A	2-178532910-T-A	TTN	NM_001267550.2	c.103705A>T_p.Lys34569Ter	1	SG	stop_gained	Ex358	NC_000002.12:g.178532910T>A	NC_000002.12(NM_001267550.2):c.103705A>T	NP_001254479.2:p.(Lys34569Ter)	LIKELY_PATHOGENIC	PVS1,PM2_supporting,PP5,PS4_NA(BP->PP)
2	178532765	G	GGTCT	2-178532765-G-GGTCT	TTN	NM_001267550.2	c.103846_103849dup_p.Pro34617GlnfsTer3	1	FS	frameshift_variant	Ex358	NC_000002.12:g.178532765_178532766insGTCT	NC_000002.12(NM_001267550.2):c.103846_103849dup	NP_001254479.2:p.(Pro34617GlnfsTer3)	LIKELY_PATHOGENIC	PVS1,PM2_supporting,PP5
2	178568884	G	A	2-178568884-G-A	TTN	NM_001267550.2	c.77248C>T_p.Arg25750Ter	1	SG	stop_gained	Ex326	NC_000002.12:g.178568884G>A	NC_000002.12(NM_001267550.2):c.77248C>T	NP_001254479.2:p.(Arg25750Ter)	LIKELY_PATHOGENIC	PVS1,PM2_supporting,PP5,PS4_NA(BP->PP)
2	178532819	CT	C	2-178532819-CT-C	TTN	NM_001267550.2	c.103795del_p.Arg34599AspfsTer7	1	FS	frameshift_variant	Ex358	NC_000002.12:g.178532820del	NC_000002.12(NM_001267550.2):c.103795del	NP_001254479.2:p.(Arg34599AspfsTer7)	LIKELY_PATHOGENIC	PVS1,PM2_supporting
2	178532855	ACT	A	2-178532855-ACT-A	TTN	NM_001267550.2	c.103758_103759del_p.Arg34586SerfsTer32	1	FS	frameshift_variant	Ex358	NC_000002.12:g.178532856_178532857del	NC_000002.12(NM_001267550.2):c.103758_103759del	NP_001254479.2:p.(Arg34586SerfsTer32)	LIKELY_PATHOGENIC	PVS1,PM2_supporting,PP5
2	178536576	C	G	2-178536576-C-G	TTN	NM_001267550.2	c.100172-1G>C_p.?	1	ESS	splice_acceptor_variant	In356/357	NC_000002.12:g.178536576C>G	NC_000002.12(NM_001267550.2):c.100172-1G>C	NP_001254479.2:p.(?)	LIKELY_PATHOGENIC	PVS1,PM2_supporting,PP5,PS4_NA(BP->PP)
2	178532877	T	TTG	2-178532877-T-TTG	TTN	NM_001267550.2	c.103737_103738insCA_p.Met34580GlnfsTer27	1	FS	frameshift_variant	Ex358	NC_000002.12:g.178532877_178532878insTG	NC_000002.12(NM_001267550.2):c.103737_103738insCA	NP_001254479.2:p.(Met34580GlnfsTer27)	LIKELY_PATHOGENIC	PVS1,PM2_supporting,PP5
2	178533254	TC	T	2-178533254-TC-T	TTN	NM_001267550.2	c.103360del_p.Glu34454AsnfsTer3	1	FS	frameshift_variant	Ex358	NC_000002.12:g.178533255del	NC_000002.12(NM_001267550.2):c.103360del	NP_001254479.2:p.(Glu34454AsnfsTer3)	PATHOGENIC	PVS1,PM2_supporting,PS4
2	178590170	G	A	2-178590170-G-A	TTN	NM_001267550.2	c.61555C>T_p.Arg20519Ter	1	SG	stop_gained	Ex304	NC_000002.12:g.178590170G>A	NC_000002.12(NM_001267550.2):c.61555C>T	NP_001254479.2:p.(Arg20519Ter)	LIKELY_PATHOGENIC	PVS1,PM2_supporting,PP5,PS4_NA(BP->PP)
2	178570804	G	A	2-178570804-G-A	TTN	NM_001267550.2	c.75328C>T_p.Arg25110Ter	1	SG	stop_gained	Ex326	NC_000002.12:g.178570804G>A	NC_000002.12(NM_001267550.2):c.75328C>T	NP_001254479.2:p.(Arg25110Ter)	LIKELY_PATHOGENIC	PVS1,PM2_supporting,PP5,PS4_NA(BP->PP)
2	178531668	G	A	2-178531668-G-A	TTN	NM_001267550.2	c.104947C>T_p.Gln34983Ter	1	SG	stop_gained	Ex358	NC_000002.12:g.178531668G>A	NC_000002.12(NM_001267550.2):c.104947C>T	NP_001254479.2:p.(Gln34983Ter)	LIKELY_PATHOGENIC	PVS1,PM2_supporting,PP5,PS4_NA(BP->PP)
2	178605642	C	A	2-178605642-C-A	TTN	NM_001267550.2	c.53653G>T_p.Glu17885Ter	1	SG	stop_gained	Ex279	NC_000002.12:g.178605642C>A	NC_000002.12(NM_001267550.2):c.53653G>T	NP_001254479.2:p.(Glu17885Ter)	LIKELY_PATHOGENIC	PVS1,PM2_supporting,PP5,PS4_NA(BP->PP)
2	178779423	C	A	2-178779423-C-A	TTN	NM_001267550.2	c.3769G>T_p.Glu1257Ter	1	SG	stop_gained	Ex23	NC_000002.12:g.178779423C>A	NC_000002.12(NM_001267550.2):c.3769G>T	NP_001254479.2:p.(Glu1257Ter)	LIKELY_PATHOGENIC	PVS1,PM2_supporting,PP5,PS4_NA(BP->PP)
2	178533303	CTG	C	2-178533303-CTG-C	TTN	NM_001267550.2	c.103310_103311del_p.Thr34437SerfsTer3	1	FS	frameshift_variant	Ex358	NC_000002.12:g.178533304_178533305del	NC_000002.12(NM_001267550.2):c.103310_103311del	NP_001254479.2:p.(Thr34437SerfsTer3)	LIKELY_PATHOGENIC	PVS1,PM2_supporting
2	178795135	A	AG	2-178795135-A-AG	TTN	NM_001267550.2	c.1031dup_p.Trp345LeufsTer12	1	FS	frameshift_variant	Ex7	NC_000002.12:g.178795135_178795136insG	NC_000002.12(NM_001267550.2):c.1031dup	NP_001254479.2:p.(Trp345LeufsTer12)	LIKELY_PATHOGENIC	PVS1,PM2_supporting
2	178533442	T	TG	2-178533442-T-TG	TTN	NM_001267550.2	c.103172dup_p.Pro34392ThrfsTer17	1	FS	frameshift_variant	Ex358	NC_000002.12:g.178533442_178533443insG	NC_000002.12(NM_001267550.2):c.103172dup	NP_001254479.2:p.(Pro34392ThrfsTer17)	LIKELY_PATHOGENIC	PVS1,PM2_supporting,PP5,PS4_NA(BP->PP)
2	178576691	G	A	2-178576691-G-A	TTN	NM_001267550.2	c.69553C>T_p.Arg23185Ter	1	SG	stop_gained	Ex325	NC_000002.12:g.178576691G>A	NC_000002.12(NM_001267550.2):c.69553C>T	NP_001254479.2:p.(Arg23185Ter)	LIKELY_PATHOGENIC	PVS1,PM2_supporting,PP5,PS4_NA(BP->PP)
2	178599392	G	A	2-178599392-G-A	TTN	NM_001267550.2	c.56401C>T_p.Gln18801Ter	1	SG	stop_gained	Ex290	NC_000002.12:g.178599392G>A	NC_000002.12(NM_001267550.2):c.56401C>T	NP_001254479.2:p.(Gln18801Ter)	LIKELY_PATHOGENIC	PVS1,PM2_supporting,PP5,PS4_NA(BP->PP)
2	178570663	G	A	2-178570663-G-A	TTN	NM_001267550.2	c.75469C>T_p.Arg25157Ter	1	SG	stop_gained	Ex326	NC_000002.12:g.178570663G>A	NC_000002.12(NM_001267550.2):c.75469C>T	NP_001254479.2:p.(Arg25157Ter)	PATHOGENIC	PVS1,PM2_supporting,PP5,PS4_moderate
2	178766507	G	A	2-178766507-G-A	TTN	NM_001267550.2	c.9577C>T_p.Arg3193Ter	1	SG	stop_gained	Ex41	NC_000002.12:g.178766507G>A	NC_000002.12(NM_001267550.2):c.9577C>T	NP_001254479.2:p.(Arg3193Ter)	PATHOGENIC	PVS1,PM2_supporting,PP5,PS4_moderate
2	178590230	G	A	2-178590230-G-A	TTN	NM_001267550.2	c.61495C>T_p.Arg20499Ter	1	SG	stop_gained	Ex304	NC_000002.12:g.178590230G>A	NC_000002.12(NM_001267550.2):c.61495C>T	NP_001254479.2:p.(Arg20499Ter)	PATHOGENIC	PVS1,PM2_supporting,PP5,PS4_moderate
2	178604986	C	T	2-178604986-C-T	TTN	NM_001267550.2	c.54190+1G>A_p.?	1	ESS	splice_donor_variant	In280/281	NC_000002.12:g.178604986C>T	NC_000002.12(NM_001267550.2):c.54190+1G>A	NP_001254479.2:p.(?)	PATHOGENIC	PVS1,PM2_supporting,PP5,PS4_moderate
2	178542263	C	G	2-178542263-C-G	TTN	NM_001267550.2	c.97492+1G>C_p.?	1	ESS	splice_donor_variant	In349/350	NC_000002.12:g.178542263C>G	NC_000002.12(NM_001267550.2):c.97492+1G>C	NP_001254479.2:p.(?)	PATHOGENIC	PVS1,PM2_supporting,PP5,PS4_moderate
2	178545895	G	A	2-178545895-G-A	TTN	NM_001267550.2	c.95341C>T_p.Arg31781Ter	1	SG	stop_gained	Ex343	NC_000002.12:g.178545895G>A	NC_000002.12(NM_001267550.2):c.95341C>T	NP_001254479.2:p.(Arg31781Ter)	PATHOGENIC	PVS1,PM2_supporting,PP5,PS4_moderate
2	178589804	G	A	2-178589804-G-A	TTN	NM_001267550.2	c.61921C>T_p.Arg20641Ter	1	SG	stop_gained	Ex304	NC_000002.12:g.178589804G>A	NC_000002.12(NM_001267550.2):c.61921C>T	NP_001254479.2:p.(Arg20641Ter)	PATHOGENIC	PVS1,PM2_supporting,PP5,PS4_moderate
2	178533490	TTGGCATTC	T	2-178533490-TTGGCATTC-T	TTN	NM_001267550.2	c.103117_103124del_p.Glu34373ArgfsTer8	1	FS	frameshift_variant	Ex358	NC_000002.12:g.178533491_178533498del	NC_000002.12(NM_001267550.2):c.103117_103124del	NP_001254479.2:p.(Glu34373ArgfsTer8)	LIKELY_PATHOGENIC	PVS1,PM2_supporting,PP5
2	178533571	C	CT	2-178533571-C-CT	TTN	NM_001267550.2	c.103043_103044insA_p.Thr34349AspfsTer11	1	FS	frameshift_variant	Ex358	NC_000002.12:g.178533571_178533572insT	NC_000002.12(NM_001267550.2):c.103043_103044insA	NP_001254479.2:p.(Thr34349AspfsTer11)	LIKELY_PATHOGENIC	PVS1,PM2_supporting,PP5
2	178533652	G	GTTGA	2-178533652-G-GTTGA	TTN	NM_001267550.2	c.102959_102962dup_p.Ser34322GlnfsTer7	1	FS	frameshift_variant	Ex358	NC_000002.12:g.178533652_178533653insTTGA	NC_000002.12(NM_001267550.2):c.102959_102962dup	NP_001254479.2:p.(Ser34322GlnfsTer7)	PATHOGENIC	PVS1,PM2_supporting,PS4_moderate(BP->PS)
2	178609301	G	A	2-178609301-G-A	TTN	NM_001267550.2	c.52009C>T_p.Arg17337Ter	1	SG	stop_gained	Ex273	NC_000002.12:g.178609301G>A	NC_000002.12(NM_001267550.2):c.52009C>T	NP_001254479.2:p.(Arg17337Ter)	PATHOGENIC	PVS1,PM2_supporting,PP5,PS4_moderate
2	178535388	G	A	2-178535388-G-A	TTN	NM_001267550.2	c.101227C>T_p.Arg33743Ter	1	SG	stop_gained	Ex358	NC_000002.12:g.178535388G>A	NC_000002.12(NM_001267550.2):c.101227C>T	NP_001254479.2:p.(Arg33743Ter)	PATHOGENIC	PVS1,PM2_supporting,PP5,PS4_moderate
2	178614226	G	A	2-178614226-G-A	TTN	NM_001267550.2	c.49171C>T_p.Arg16391Ter	1	SG	stop_gained	Ex262	NC_000002.12:g.178614226G>A	NC_000002.12(NM_001267550.2):c.49171C>T	NP_001254479.2:p.(Arg16391Ter)	PATHOGENIC	PVS1,PM2_supporting,PP5,PS4_moderate
2	178560364	G	A	2-178560364-G-A	TTN	NM_001267550.2	c.85768C>T_p.Arg28590Ter	1	SG	stop_gained	Ex326	NC_000002.12:g.178560364G>A	NC_000002.12(NM_001267550.2):c.85768C>T	NP_001254479.2:p.(Arg28590Ter)	PATHOGENIC	PVS1,PM2_supporting,PP5,PS4_moderate(BP->PS)
2	178533673	AC	A	2-178533673-AC-A	TTN	NM_001267550.2	c.102941del_p.Gly34314ValfsTer5	1	FS	frameshift_variant	Ex358	NC_000002.12:g.178533674del	NC_000002.12(NM_001267550.2):c.102941del	NP_001254479.2:p.(Gly34314ValfsTer5)	LIKELY_PATHOGENIC	PVS1,PM2_supporting
2	178758998	T	TTGGC	2-178758998-T-TTGGC	TTN	NM_001267550.2	c.10285_10288dup_p.Asn3430SerfsTer9	1	FS	frameshift_variant	Ex44	NC_000002.12:g.178758998_178758999insTGGC	NC_000002.12(NM_001267550.2):c.10285_10288dup	NP_001254479.2:p.(Asn3430SerfsTer9)	LIKELY_PATHOGENIC	PVS1,PM2_supporting,PS4_NA(BP->PP)
2	178575154	G	A	2-178575154-G-A	TTN	NM_001267550.2	c.70978C>T_p.Arg23660Ter	1	SG	stop_gained	Ex326	NC_000002.12:g.178575154G>A	NC_000002.12(NM_001267550.2):c.70978C>T	NP_001254479.2:p.(Arg23660Ter)	PATHOGENIC	PVS1,PM2_supporting,PP5,PS4_supporting
2	178534132	AT	A	2-178534132-AT-A	TTN	NM_001267550.2	c.102482del_p.Asn34161IlefsTer8	1	FS	frameshift_variant	Ex358	NC_000002.12:g.178534133del	NC_000002.12(NM_001267550.2):c.102482del	NP_001254479.2:p.(Asn34161IlefsTer8)	LIKELY_PATHOGENIC	PVS1,PM2_supporting
2	178759039	AAACGTGT	A	2-178759039-AAACGTGT-A	TTN	NM_001267550.2	c.10241_10247del_p.Tyr3414LeufsTer7	1	FS	frameshift_variant	Ex44	NC_000002.12:g.178759040_178759046del	NC_000002.12(NM_001267550.2):c.10241_10247del	NP_001254479.2:p.(Tyr3414LeufsTer7)	PATHOGENIC	PVS1,PM2_supporting,PP5,PS4_supporting
2	178570901	A	T	2-178570901-A-T	TTN	NM_001267550.2	c.75231T>A_p.Tyr25077Ter	1	SG	stop_gained	Ex326	NC_000002.12:g.178570901A>T	NC_000002.12(NM_001267550.2):c.75231T>A	NP_001254479.2:p.(Tyr25077Ter)	PATHOGENIC	PVS1,PM2_supporting,PP5,PS4_supporting
2	178553242	G	T	2-178553242-G-T	TTN	NM_001267550.2	c.89658C>A_p.Tyr29886Ter	1	SG	stop_gained	Ex335	NC_000002.12:g.178553242G>T	NC_000002.12(NM_001267550.2):c.89658C>A	NP_001254479.2:p.(Tyr29886Ter)	PATHOGENIC	PVS1,PM2_supporting,PP5,PS4_supporting
2	178741321	C	T	2-178741321-C-T	TTN	NM_001267550.2	c.11912G>A_p.Trp3971Ter	1	SG	stop_gained	Ex48	NC_000002.12:g.178741321C>T	NC_000002.12(NM_001267550.2):c.11912G>A	NP_001254479.2:p.(Trp3971Ter)	PATHOGENIC	PVS1,PM2_supporting,PP5,PS4_supporting
2	178563859	G	A	2-178563859-G-A	TTN	NM_001267550.2	c.82273C>T_p.Gln27425Ter	1	SG	stop_gained	Ex326	NC_000002.12:g.178563859G>A	NC_000002.12(NM_001267550.2):c.82273C>T	NP_001254479.2:p.(Gln27425Ter)	PATHOGENIC	PVS1,PM2_supporting,PP5,PS4_supporting
2	178536358	G	T	2-178536358-G-T	TTN	NM_001267550.2	c.100389C>A_p.Tyr33463Ter	1	SG	stop_gained	Ex357	NC_000002.12:g.178536358G>T	NC_000002.12(NM_001267550.2):c.100389C>A	NP_001254479.2:p.(Tyr33463Ter)	PATHOGENIC	PVS1,PM2_supporting,PP5,PS4_supporting
2	178532100	G	A	2-178532100-G-A	TTN	NM_001267550.2	c.104515C>T_p.Arg34839Ter	1	SG	stop_gained	Ex358	NC_000002.12:g.178532100G>A	NC_000002.12(NM_001267550.2):c.104515C>T	NP_001254479.2:p.(Arg34839Ter)	PATHOGENIC	PVS1,PM2_supporting,PP5,PS4_supporting
2	178571886	C	T	2-178571886-C-T	TTN	NM_001267550.2	c.74246G>A_p.Trp24749Ter	1	SG	stop_gained	Ex326	NC_000002.12:g.178571886C>T	NC_000002.12(NM_001267550.2):c.74246G>A	NP_001254479.2:p.(Trp24749Ter)	PATHOGENIC	PVS1,PM2_supporting,PP5,PS4_supporting
2	178591043	T	TA	2-178591043-T-TA	TTN	NM_001267550.2	c.60681dup_p.Lys20228Ter	1	SG	frameshift_variant|stop_gained	Ex304	NC_000002.12:g.178591043_178591044insA	NC_000002.12(NM_001267550.2):c.60681dup	NP_001254479.2:p.(Lys20228Ter)	PATHOGENIC	PVS1,PM2_supporting,PP5,PS4_supporting
2	178592056	G	A	2-178592056-G-A	TTN	NM_001267550.2	c.59848C>T_p.Arg19950Ter	1	SG	stop_gained	Ex302	NC_000002.12:g.178592056G>A	NC_000002.12(NM_001267550.2):c.59848C>T	NP_001254479.2:p.(Arg19950Ter)	PATHOGENIC	PVS1,PM2_supporting,PP5,PS4_supporting
2	178534377	CTCTT	C	2-178534377-CTCTT-C	TTN	NM_001267550.2	c.102234_102237del_p.Arg34079SerfsTer9	1	FS	frameshift_variant	Ex358	NC_000002.12:g.178534378_178534381del	NC_000002.12(NM_001267550.2):c.102234_102237del	NP_001254479.2:p.(Arg34079SerfsTer9)	PATHOGENIC	PVS1,PM2_supporting,PP5,PS4_supporting
2	178534437	ATT	A	2-178534437-ATT-A	TTN	NM_001267550.2	c.102176_102177del_p.Lys34059IlefsTer24	1	FS	frameshift_variant	Ex358	NC_000002.12:g.178534438_178534439del	NC_000002.12(NM_001267550.2):c.102176_102177del	NP_001254479.2:p.(Lys34059IlefsTer24)	LIKELY_PATHOGENIC	PVS1,PM2_supporting,PP5
2	178534870	TTC	T	2-178534870-TTC-T	TTN	NM_001267550.2	c.101743_101744del_p.Glu33915AsnfsTer10	1	FS	frameshift_variant	Ex358	NC_000002.12:g.178534871_178534872del	NC_000002.12(NM_001267550.2):c.101743_101744del	NP_001254479.2:p.(Glu33915AsnfsTer10)	LIKELY_PATHOGENIC	PVS1,PM2_supporting
2	178544357	G	A	2-178544357-G-A	TTN	NM_001267550.2	c.95872C>T_p.Arg31958Ter	1	SG	stop_gained	Ex345	NC_000002.12:g.178544357G>A	NC_000002.12(NM_001267550.2):c.95872C>T	NP_001254479.2:p.(Arg31958Ter)	PATHOGENIC	PVS1,PM2_supporting,PP5,PS4_supporting
2	178543876	G	A	2-178543876-G-A	TTN	NM_001267550.2	c.96268C>T_p.Gln32090Ter	1	SG	stop_gained	Ex346	NC_000002.12:g.178543876G>A	NC_000002.12(NM_001267550.2):c.96268C>T	NP_001254479.2:p.(Gln32090Ter)	PATHOGENIC	PVS1,PM2_supporting,PP5,PS4_supporting
2	178535516	T	TA	2-178535516-T-TA	TTN	NM_001267550.2	c.101098_101099insT_p.Asp33700ValfsTer13	1	FS	frameshift_variant	Ex358	NC_000002.12:g.178535516_178535517insA	NC_000002.12(NM_001267550.2):c.101098_101099insT	NP_001254479.2:p.(Asp33700ValfsTer13)	LIKELY_PATHOGENIC	PVS1,PM2_supporting,PP5,PS4_NA(BP->PP)
2	178565095	G	A	2-178565095-G-A	TTN	NM_001267550.2	c.81037C>T_p.Arg27013Ter	1	SG	stop_gained	Ex326	NC_000002.12:g.178565095G>A	NC_000002.12(NM_001267550.2):c.81037C>T	NP_001254479.2:p.(Arg27013Ter)	PATHOGENIC	PVS1,PM2_supporting,PP5,PS4_supporting
2	178528523	CTTACTGGCAGGTTGTTTTTAAACCATTCGA	C	2-178528523-CTTACTGGCAGGTTGTTTTTAAACCATTCGA-C	TTN	NM_001267550.2	c.107198_107223+4del_p.?	1	ESS	splice_acceptor_variant	Ex360-In360/361	NC_000002.12:g.178528524_178528553del	NC_000002.12(NM_001267550.2):c.107198_107223+4del	NP_001254479.2:p.(?)	PATHOGENIC	PVS1,PM2_supporting,PP5,PS4_supporting
2	178557511	G	A	2-178557511-G-A	TTN	NM_001267550.2	c.87751C>T_p.Arg29251Ter	1	SG	stop_gained	Ex329	NC_000002.12:g.178557511G>A	NC_000002.12(NM_001267550.2):c.87751C>T	NP_001254479.2:p.(Arg29251Ter)	PATHOGENIC	PVS1,PM2_supporting,PP5,PS4_supporting
2	178613939	T	A	2-178613939-T-A	TTN	NM_001267550.2	c.49346-2A>T_p.?	1	ESS	splice_acceptor_variant	In262/263	NC_000002.12:g.178613939T>A	NC_000002.12(NM_001267550.2):c.49346-2A>T	NP_001254479.2:p.(?)	PATHOGENIC	PVS1,PM2_supporting,PP5,PS4_supporting
2	178536041	TG	T	2-178536041-TG-T	TTN	NM_001267550.2	c.100705del_p.Gln33569LysfsTer58	1	FS	frameshift_variant	Ex357	NC_000002.12:g.178536042del	NC_000002.12(NM_001267550.2):c.100705del	NP_001254479.2:p.(Gln33569LysfsTer58)	LIKELY_PATHOGENIC	PVS1,PM2_supporting
2	178536105	A	AT	2-178536105-A-AT	TTN	NM_001267550.2	c.100641dup_p.Phe33548IlefsTer2	1	FS	frameshift_variant	Ex357	NC_000002.12:g.178536105_178536106insT	NC_000002.12(NM_001267550.2):c.100641dup	NP_001254479.2:p.(Phe33548IlefsTer2)	LIKELY_PATHOGENIC	PVS1,PM2_supporting,PP5
2	178562889	A	C	2-178562889-A-C	TTN	NM_001267550.2	c.83243T>G_p.Leu27748Ter	1	SG	stop_gained	Ex326	NC_000002.12:g.178562889A>C	NC_000002.12(NM_001267550.2):c.83243T>G	NP_001254479.2:p.(Leu27748Ter)	PATHOGENIC	PVS1,PM2_supporting,PP5,PS4_supporting
2	178738259	G	A	2-178738259-G-A	TTN	NM_001267550.2	c.14194C>T_p.Gln4732Ter	1	SG	stop_gained	Ex49	NC_000002.12:g.178738259G>A	NC_000002.12(NM_001267550.2):c.14194C>T	NP_001254479.2:p.(Gln4732Ter)	PATHOGENIC	PVS1,PM2_supporting,PP5,PS4_supporting
2	178536282	AT	A	2-178536282-AT-A	TTN	NM_001267550.2	c.100464del_p.Lys33488AsnfsTer15	1	FS	frameshift_variant	Ex357	NC_000002.12:g.178536283del	NC_000002.12(NM_001267550.2):c.100464del	NP_001254479.2:p.(Lys33488AsnfsTer15)	LIKELY_PATHOGENIC	PVS1,PM2_supporting
2	178536292	G	GA	2-178536292-G-GA	TTN	NM_001267550.2	c.100454dup_p.Thr33486HisfsTer5	1	FS	frameshift_variant	Ex357	NC_000002.12:g.178536292_178536293insA	NC_000002.12(NM_001267550.2):c.100454dup	NP_001254479.2:p.(Thr33486HisfsTer5)	LIKELY_PATHOGENIC	PVS1,PM2_supporting,PP5
2	178581640	G	A	2-178581640-G-A	TTN	NM_001267550.2	c.66628C>T_p.Gln22210Ter	1	SG	stop_gained	Ex316	NC_000002.12:g.178581640G>A	NC_000002.12(NM_001267550.2):c.66628C>T	NP_001254479.2:p.(Gln22210Ter)	PATHOGENIC	PVS1,PM2_supporting,PP5,PS4_supporting
2	178613870	C	T	2-178613870-C-T	TTN	NM_001267550.2	c.49413G>A_p.Trp16471Ter	1	SG	stop_gained	Ex263	NC_000002.12:g.178613870C>T	NC_000002.12(NM_001267550.2):c.49413G>A	NP_001254479.2:p.(Trp16471Ter)	PATHOGENIC	PVS1,PM2_supporting,PP5,PS4_supporting
2	178537078	GAAGAC	G	2-178537078-GAAGAC-G	TTN	NM_001267550.2	c.100026_100030del_p.Ser33344HisfsTer7	1	FS	frameshift_variant	Ex356	NC_000002.12:g.178537079_178537083del	NC_000002.12(NM_001267550.2):c.100026_100030del	NP_001254479.2:p.(Ser33344HisfsTer7)	PATHOGENIC	PVS1,PM2_supporting,PP5,PS4_supporting
2	178604206	G	A	2-178604206-G-A	TTN	NM_001267550.2	c.54481C>T_p.Gln18161Ter	1	SG	stop_gained	Ex282	NC_000002.12:g.178604206G>A	NC_000002.12(NM_001267550.2):c.54481C>T	NP_001254479.2:p.(Gln18161Ter)	PATHOGENIC	PVS1,PM2_supporting,PP5,PS4_supporting
2	178531962	G	A	2-178531962-G-A	TTN	NM_001267550.2	c.104653C>T_p.Arg34885Ter	1	SG	stop_gained	Ex358	NC_000002.12:g.178531962G>A	NC_000002.12(NM_001267550.2):c.104653C>T	NP_001254479.2:p.(Arg34885Ter)	PATHOGENIC	PVS1,PM2_supporting,PP5,PS4_supporting
2	178621502	G	A	2-178621502-G-A	TTN	NM_001267550.2	c.45322C>T_p.Arg15108Ter	1	SG	stop_gained	Ex245	NC_000002.12:g.178621502G>A	NC_000002.12(NM_001267550.2):c.45322C>T	NP_001254479.2:p.(Arg15108Ter)	PATHOGENIC	PVS1,PM2_supporting,PP5,PS4_supporting
2	178543135	G	A	2-178543135-G-A	TTN	NM_001267550.2	c.96838C>T_p.Gln32280Ter	1	SG	stop_gained	Ex347	NC_000002.12:g.178543135G>A	NC_000002.12(NM_001267550.2):c.96838C>T	NP_001254479.2:p.(Gln32280Ter)	PATHOGENIC	PVS1,PM2_supporting,PP5,PS4_supporting
2	178599298	C	T	2-178599298-C-T	TTN	NM_001267550.2	c.56495G>A_p.Trp18832Ter	1	SG	stop_gained	Ex290	NC_000002.12:g.178599298C>T	NC_000002.12(NM_001267550.2):c.56495G>A	NP_001254479.2:p.(Trp18832Ter)	PATHOGENIC	PVS1,PM2_supporting,PP5,PS4_supporting
2	178546072	G	A	2-178546072-G-A	TTN	NM_001267550.2	c.95164C>T_p.Gln31722Ter	1	SG	stop_gained	Ex343	NC_000002.12:g.178546072G>A	NC_000002.12(NM_001267550.2):c.95164C>T	NP_001254479.2:p.(Gln31722Ter)	PATHOGENIC	PVS1,PM2_supporting,PP5,PS4_supporting
2	178618037	G	A	2-178618037-G-A	TTN	NM_001267550.2	c.47314C>T_p.Arg15772Ter	1	SG	stop_gained	Ex253	NC_000002.12:g.178618037G>A	NC_000002.12(NM_001267550.2):c.47314C>T	NP_001254479.2:p.(Arg15772Ter)	PATHOGENIC	PVS1,PM2_supporting,PP5,PS4_supporting
2	178632575	G	C	2-178632575-G-C	TTN	NM_001267550.2	c.43431C>G_p.Tyr14477Ter	1	SG	stop_gained	Ex235	NC_000002.12:g.178632575G>C	NC_000002.12(NM_001267550.2):c.43431C>G	NP_001254479.2:p.(Tyr14477Ter)	PATHOGENIC	PVS1,PM2_supporting,PP5,PS4_supporting
2	178564096	G	A	2-178564096-G-A	TTN	NM_001267550.2	c.82036C>T_p.Gln27346Ter	1	SG	stop_gained	Ex326	NC_000002.12:g.178564096G>A	NC_000002.12(NM_001267550.2):c.82036C>T	NP_001254479.2:p.(Gln27346Ter)	PATHOGENIC	PVS1,PM2_supporting,PP5,PS4_supporting
2	178633324	G	A	2-178633324-G-A	TTN	NM_001267550.2	c.42949C>T_p.Arg14317Ter	1	SG	splice_region_variant|stop_gained	Ex233	NC_000002.12:g.178633324G>A	NC_000002.12(NM_001267550.2):c.42949C>T	NP_001254479.2:p.(Arg14317Ter)	PATHOGENIC	PVS1,PM2_supporting,PP5,PS4_supporting
2	178572382	G	A	2-178572382-G-A	TTN	NM_001267550.2	c.73750C>T_p.Gln24584Ter	1	SG	stop_gained	Ex326	NC_000002.12:g.178572382G>A	NC_000002.12(NM_001267550.2):c.73750C>T	NP_001254479.2:p.(Gln24584Ter)	PATHOGENIC	PVS1,PM2_supporting,PP5,PS4_supporting
2	178607884	G	A	2-178607884-G-A	TTN	NM_001267550.2	c.52903C>T_p.Arg17635Ter	1	SG	stop_gained	Ex276	NC_000002.12:g.178607884G>A	NC_000002.12(NM_001267550.2):c.52903C>T	NP_001254479.2:p.(Arg17635Ter)	PATHOGENIC	PVS1,PM2_supporting,PP5,PS4_supporting
2	178530783	G	A	2-178530783-G-A	TTN	NM_001267550.2	c.105832C>T_p.Gln35278Ter	1	SG	stop_gained	Ex358	NC_000002.12:g.178530783G>A	NC_000002.12(NM_001267550.2):c.105832C>T	NP_001254479.2:p.(Gln35278Ter)	PATHOGENIC	PVS1,PM2_supporting,PP5,PS4_supporting
2	178549328	C	T	2-178549328-C-T	TTN	NM_001267550.2	c.92298G>A_p.Trp30766Ter	1	SG	stop_gained	Ex339	NC_000002.12:g.178549328C>T	NC_000002.12(NM_001267550.2):c.92298G>A	NP_001254479.2:p.(Trp30766Ter)	PATHOGENIC	PVS1,PM2_supporting,PP5,PS4_supporting
2	178609774	C	A	2-178609774-C-A	TTN	NM_001267550.2	c.51649G>T_p.Glu17217Ter	1	SG	stop_gained	Ex272	NC_000002.12:g.178609774C>A	NC_000002.12(NM_001267550.2):c.51649G>T	NP_001254479.2:p.(Glu17217Ter)	PATHOGENIC	PVS1,PM2_supporting,PP5,PS4_supporting
2	178577085	G	A	2-178577085-G-A	TTN	NM_001267550.2	c.69250C>T_p.Arg23084Ter	1	SG	stop_gained	Ex324	NC_000002.12:g.178577085G>A	NC_000002.12(NM_001267550.2):c.69250C>T	NP_001254479.2:p.(Arg23084Ter)	PATHOGENIC	PVS1,PM2_supporting,PP5,PS4_supporting
2	178559797	G	A	2-178559797-G-A	TTN	NM_001267550.2	c.86335C>T_p.Arg28779Ter	1	SG	stop_gained	Ex326	NC_000002.12:g.178559797G>A	NC_000002.12(NM_001267550.2):c.86335C>T	NP_001254479.2:p.(Arg28779Ter)	PATHOGENIC	PVS1,PM2_supporting,PP5,PS4_supporting
2	178591770	G	A	2-178591770-G-A	TTN	NM_001267550.2	c.60049C>T_p.Gln20017Ter	1	SG	stop_gained	Ex303	NC_000002.12:g.178591770G>A	NC_000002.12(NM_001267550.2):c.60049C>T	NP_001254479.2:p.(Gln20017Ter)	PATHOGENIC	PVS1,PM2_supporting,PP5,PS4_supporting
2	178545817	TACTG	T	2-178545817-TACTG-T	TTN	NM_001267550.2	c.95415_95416+2del_p.?	1	ESS	splice_acceptor_variant	Ex343-In343/344	NC_000002.12:g.178545818_178545821del	NC_000002.12(NM_001267550.2):c.95415_95416+2del	NP_001254479.2:p.(?)	PATHOGENIC	PVS1,PM2_supporting,PP5,PS4_supporting(BP->PM)
2	178622684	G	A	2-178622684-G-A	TTN	NM_001267550.2	c.44899C>T_p.Arg14967Ter	1	SG	stop_gained	Ex243	NC_000002.12:g.178622684G>A	NC_000002.12(NM_001267550.2):c.44899C>T	NP_001254479.2:p.(Arg14967Ter)	PATHOGENIC	PVS1,PM2_supporting,PS4
2	178613006	C	T	2-178613006-C-T	TTN	NM_001267550.2	c.49715G>A_p.Trp16572Ter	1	SG	stop_gained	Ex265	NC_000002.12:g.178613006C>T	NC_000002.12(NM_001267550.2):c.49715G>A	NP_001254479.2:p.(Trp16572Ter)	LIKELY_PATHOGENIC	PVS1,PM2_supporting,PS4_NA(BP->PP)
2	178776729	A	C	2-178776729-A-C	TTN	NM_001267550.2	c.5135T>G_p.Leu1712Ter	1	SG	stop_gained	Ex28	NC_000002.12:g.178776729A>C	NC_000002.12(NM_001267550.2):c.5135T>G	NP_001254479.2:p.(Leu1712Ter)	LIKELY_PATHOGENIC	PVS1,PM2_supporting,PS4_NA(BP->PP)
2	178541281	C	G	2-178541281-C-G	TTN	NM_001267550.2	c.97795+1G>C_p.?	1	ESS	splice_donor_variant	In350/351	NC_000002.12:g.178541281C>G	NC_000002.12(NM_001267550.2):c.97795+1G>C	NP_001254479.2:p.(?)	LIKELY_PATHOGENIC	PVS1,PM2_supporting,PS4_NA(BP->PP)
2	178770439	C	A	2-178770439-C-A	TTN	NM_001267550.2	c.8353G>T_p.Gly2785Ter	1	SG	stop_gained	Ex35	NC_000002.12:g.178770439C>A	NC_000002.12(NM_001267550.2):c.8353G>T	NP_001254479.2:p.(Gly2785Ter)	LIKELY_PATHOGENIC	PVS1,PM2_supporting,PS4_NA(BP->PP)
2	178635717	T	G	2-178635717-T-G	TTN	NM_001267550.2	c.41609-2A>C_p.?	1	ESS	splice_acceptor_variant	In226/227	NC_000002.12:g.178635717T>G	NC_000002.12(NM_001267550.2):c.41609-2A>C	NP_001254479.2:p.(?)	PATHOGENIC	PVS1,PM2_supporting,PS4_moderate
2	178536246	C	A	2-178536246-C-A	TTN	NM_001267550.2	c.100501G>T_p.Glu33501Ter	1	SG	stop_gained	Ex357	NC_000002.12:g.178536246C>A	NC_000002.12(NM_001267550.2):c.100501G>T	NP_001254479.2:p.(Glu33501Ter)	PATHOGENIC	PVS1,PM2_supporting,PS4_supporting
2	178612772	C	T	2-178612772-C-T	TTN	NM_001267550.2	c.49948+1G>A_p.?	1	ESS	splice_donor_variant	In265/266	NC_000002.12:g.178612772C>T	NC_000002.12(NM_001267550.2):c.49948+1G>A	NP_001254479.2:p.(?)	PATHOGENIC	PVS1,PM2_supporting,PS4_supporting
2	178768099	G	A	2-178768099-G-A	TTN	NM_001267550.2	c.9220C>T_p.Arg3074Ter	1	SG	stop_gained	Ex39	NC_000002.12:g.178768099G>A	NC_000002.12(NM_001267550.2):c.9220C>T	NP_001254479.2:p.(Arg3074Ter)	PATHOGENIC	PVS1,PM2_supporting,PS4_supporting
2	178594647	C	T	2-178594647-C-T	TTN	NM_001267550.2	c.57848-1G>A_p.?	1	ESS	splice_acceptor_variant	In295/296	NC_000002.12:g.178594647C>T	NC_000002.12(NM_001267550.2):c.57848-1G>A	NP_001254479.2:p.(?)	PATHOGENIC	PVS1,PM2_supporting,PS4_supporting
2	178534194	G	A	2-178534194-G-A	TTN	NM_001267550.2	c.102421C>T_p.Gln34141Ter	1	SG	stop_gained	Ex358	NC_000002.12:g.178534194G>A	NC_000002.12(NM_001267550.2):c.102421C>T	NP_001254479.2:p.(Gln34141Ter)	PATHOGENIC	PVS1,PM2_supporting,PS4_supporting
2	178550966	C	A	2-178550966-C-A	TTN	NM_001267550.2	c.91564+1G>T_p.?	1	ESS	splice_donor_variant	In336/337	NC_000002.12:g.178550966C>A	NC_000002.12(NM_001267550.2):c.91564+1G>T	NP_001254479.2:p.(?)	PATHOGENIC	PVS1,PM2_supporting,PS4_supporting
2	178766547	C	T	2-178766547-C-T	TTN	NM_001267550.2	c.9537G>A_p.Trp3179Ter	1	SG	stop_gained	Ex41	NC_000002.12:g.178766547C>T	NC_000002.12(NM_001267550.2):c.9537G>A	NP_001254479.2:p.(Trp3179Ter)	PATHOGENIC	PVS1,PM2_supporting,PS4_supporting
2	178775509	C	A	2-178775509-C-A	TTN	NM_001267550.2	c.6355G>T_p.Glu2119Ter	1	SG	stop_gained	Ex28	NC_000002.12:g.178775509C>A	NC_000002.12(NM_001267550.2):c.6355G>T	NP_001254479.2:p.(Glu2119Ter)	PATHOGENIC	PVS1,PM2_supporting,PS4_supporting
2	178532361	G	A	2-178532361-G-A	TTN	NM_001267550.2	c.104254C>T_p.Gln34752Ter	1	SG	stop_gained	Ex358	NC_000002.12:g.178532361G>A	NC_000002.12(NM_001267550.2):c.104254C>T	NP_001254479.2:p.(Gln34752Ter)	PATHOGENIC	PVS1,PM2_supporting,PS4_supporting
2	178632312	T	A	2-178632312-T-A	TTN	NM_001267550.2	c.43582A>T_p.Lys14528Ter	1	SG	stop_gained	Ex236	NC_000002.12:g.178632312T>A	NC_000002.12(NM_001267550.2):c.43582A>T	NP_001254479.2:p.(Lys14528Ter)	PATHOGENIC	PVS1,PM2_supporting,PS4_supporting
2	178802316	C	T	2-178802316-C-T	TTN	NM_001267550.2	c.117G>A_p.Trp39Ter	1	SG	stop_gained	Ex3	NC_000002.12:g.178802316C>T	NC_000002.12(NM_001267550.2):c.117G>A	NP_001254479.2:p.(Trp39Ter)	PATHOGENIC	PVS1,PM2_supporting,PS4_supporting
2	178574464	C	A	2-178574464-C-A	TTN	NM_001267550.2	c.71668G>T_p.Gly23890Ter	1	SG	stop_gained	Ex326	NC_000002.12:g.178574464C>A	NC_000002.12(NM_001267550.2):c.71668G>T	NP_001254479.2:p.(Gly23890Ter)	PATHOGENIC	PVS1,PM2_supporting,PS4_supporting
2	178775803	G	A	2-178775803-G-A	TTN	NM_001267550.2	c.6061C>T_p.Arg2021Ter	1	SG	stop_gained	Ex28	NC_000002.12:g.178775803G>A	NC_000002.12(NM_001267550.2):c.6061C>T	NP_001254479.2:p.(Arg2021Ter)	PATHOGENIC	PVS1,PM2_supporting,PS4_supporting
2	178775883	G	T	2-178775883-G-T	TTN	NM_001267550.2	c.5981C>A_p.Ser1994Ter	1	SG	stop_gained	Ex28	NC_000002.12:g.178775883G>T	NC_000002.12(NM_001267550.2):c.5981C>A	NP_001254479.2:p.(Ser1994Ter)	PATHOGENIC	PVS1,PM2_supporting,PS4_supporting
2	178609529	G	A	2-178609529-G-A	TTN	NM_001267550.2	c.51781C>T_p.Arg17261Ter	1	SG	stop_gained	Ex273	NC_000002.12:g.178609529G>A	NC_000002.12(NM_001267550.2):c.51781C>T	NP_001254479.2:p.(Arg17261Ter)	PATHOGENIC	PVS1,PM2_supporting,PS4_supporting
2	178739618	T	TA	2-178739618-T-TA	TTN	NM_001267550.2	c.13614dup_p.Asn4539Ter	1	SG	frameshift_variant|stop_gained	Ex48	NC_000002.12:g.178739618_178739619insA	NC_000002.12(NM_001267550.2):c.13614dup	NP_001254479.2:p.(Asn4539Ter)	PATHOGENIC	PVS1,PM2_supporting,PS4_supporting
2	178548967	G	A	2-178548967-G-A	TTN	NM_001267550.2	c.92659C>T_p.Gln30887Ter	1	SG	stop_gained	Ex339	NC_000002.12:g.178548967G>A	NC_000002.12(NM_001267550.2):c.92659C>T	NP_001254479.2:p.(Gln30887Ter)	LIKELY_PATHOGENIC	PVS1,PM2_supporting,PP5
2	178534263	G	A	2-178534263-G-A	TTN	NM_001267550.2	c.102352C>T_p.Arg34118Ter	1	SG	stop_gained	Ex358	NC_000002.12:g.178534263G>A	NC_000002.12(NM_001267550.2):c.102352C>T	NP_001254479.2:p.(Arg34118Ter)	LIKELY_PATHOGENIC	PVS1,PM2_supporting,PP5,PS4_NA(BP->PP)
2	178630240	C	A	2-178630240-C-A	TTN	NM_001267550.2	c.44281+1G>T_p.?	1	ESS	splice_donor_variant	In239/240	NC_000002.12:g.178630240C>A	NC_000002.12(NM_001267550.2):c.44281+1G>T	NP_001254479.2:p.(?)	PATHOGENIC	PVS1,PM2_supporting,PP5,PS4_supporting
2	178578805	C	T	2-178578805-C-T	TTN	NM_001267550.2	c.68224+1G>A_p.?	1	ESS	splice_donor_variant	In320/321	NC_000002.12:g.178578805C>T	NC_000002.12(NM_001267550.2):c.68224+1G>A	NP_001254479.2:p.(?)	PATHOGENIC	PVS1,PM2_supporting,PP5,PS4_supporting
2	178597751	G	A	2-178597751-G-A	TTN	NM_001267550.2	c.57331C>T_p.Arg19111Ter	1	SG	stop_gained	Ex294	NC_000002.12:g.178597751G>A	NC_000002.12(NM_001267550.2):c.57331C>T	NP_001254479.2:p.(Arg19111Ter)	PATHOGENIC	PVS1,PM2_supporting,PS4
